# Supplementary material for: PIDA-mediated synthesis of kynurenine derivatives by oxidative fragmentation of the tryptophan scaffold
Source: Royal Society of Chemistry journal article supplement (doi:10.1039/d5ob00057b), 2025-01-01
Supplement: d5ob00057b1.pdf [file d5ob00057b1.pdf]

## Electronic Supplementary Information (ESI)

### PIDA-Mediated Synthesis of Kynurenine Derivatives by Oxidative Fragmentation of Tryptophan Scaffold

Chinmay K. Jena,<sup>a,c</sup> Aurobindo Patnaik,<sup>a,c</sup> Sushree S. Nayak,<sup>a,c</sup> Supriya Kumari,<sup>a,b</sup> Ankita Panda,<sup>a,c</sup> Manjusha Dixit<sup>b,c</sup> and Nagendra K. Sharma\*<sup>a,c</sup>

<sup>a</sup>School of Chemical Sciences, National Institute of Science Education and Research (NISER), Jatani-752050, Odisha, India.

<sup>b</sup>School of Biological Sciences, National Institute of Science Education and Research (NISER), Jatani-752050, Odisha, India.

<sup>c</sup>Homi Bhabha National Institute (HBNI)-Mumbai, Anushaktinagar, Mumbai, 400 094, India

\*Corresponding author. Tel.: 0674-249-4141; fax: +91 (674) 2494004; E-mail: [nagendra@niser.ac.in](mailto:nagendra@niser.ac.in)

### Contents

|    |                                                                                                                        |      |
|----|------------------------------------------------------------------------------------------------------------------------|------|
| 1. | NMR and Mass Spectra of Tryptophan Derivatives ( <b>2a-2l/4a-4m/6a-6i</b> ) .....                                      | S2   |
| 2. | NMR and Mass Spectra of Kynurenine Derivatives ( <b>3a-3l/5a-5m/7a-7i</b> ) .....                                      | S70  |
| 3. | NMR and Mass Spectra of <i>N</i> -phenyl tryptophan ( <b>9</b> ) and <i>N</i> -troponyl tryptophan ( <b>12</b> ) ..... | S139 |
| 4. | NMR and Mass Spectra of Spirocyclic Motifs ( <b>8/10/13</b> ) .....                                                    | S142 |
| 5. | X-Ray Studies of Single Crystals .....                                                                                 | S147 |
| 6. | Biofilm Assay .....                                                                                                    | S156 |
| 7. | Pyocyanin Assay .....                                                                                                  | S160 |

8. Swarming Motility Assay ..... S161
9. Scanning Electron Microscopy (SEM) Analysis ..... S162
10. Bacterial Growth Curve Measurement..... S164
11. QRT-PCR (Quantitative Real-Time Polymerase Chain Reaction) Analysis ..... S164
12. Plausible Mechanisms for the Synthesis of Spirocyclic Motifs ..... S167

## 1. NMR and Mass Spectra of Tryptophan Derivatives (2a-2l/4a-4m/6a-6i)

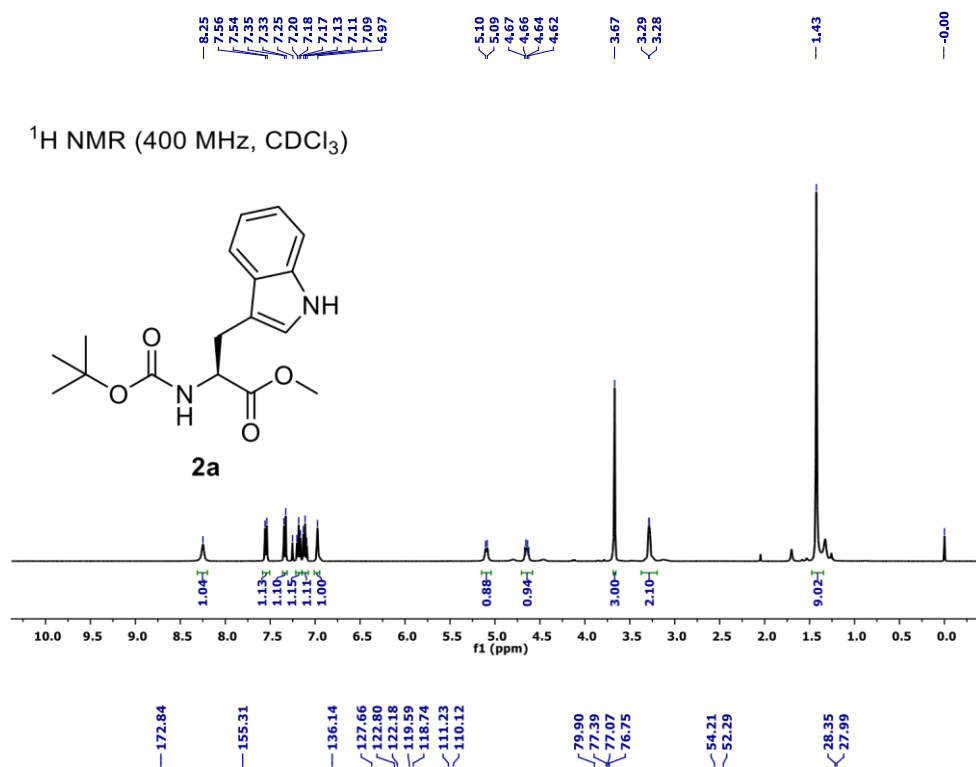

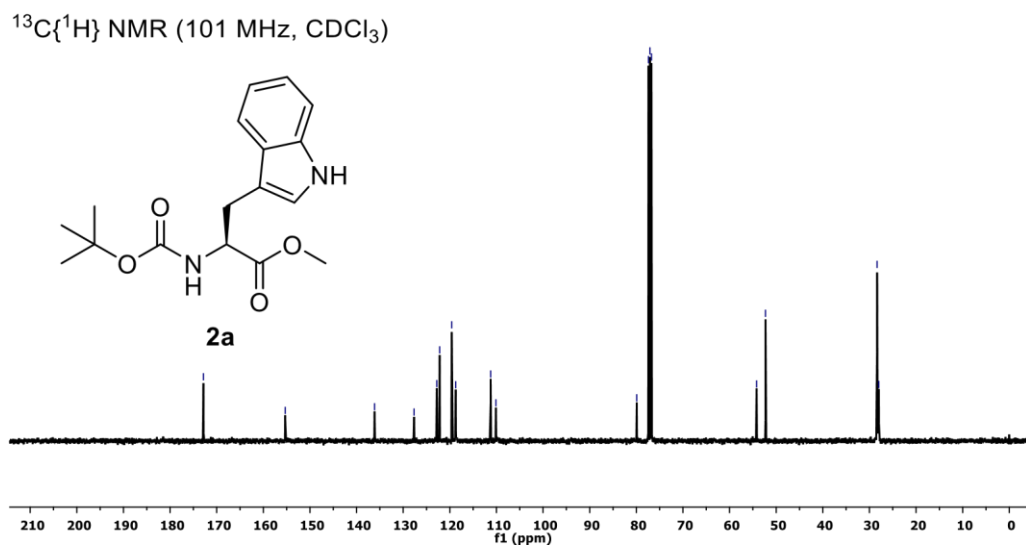

**Fig S1.**  $^1\text{H}$ ,  $^{13}\text{C}$   $\{^1\text{H}\}$  NMR spectra of tryptophan derivative **2a**.

NKS\_ARP\_40

05-May-2024  
22:14:41

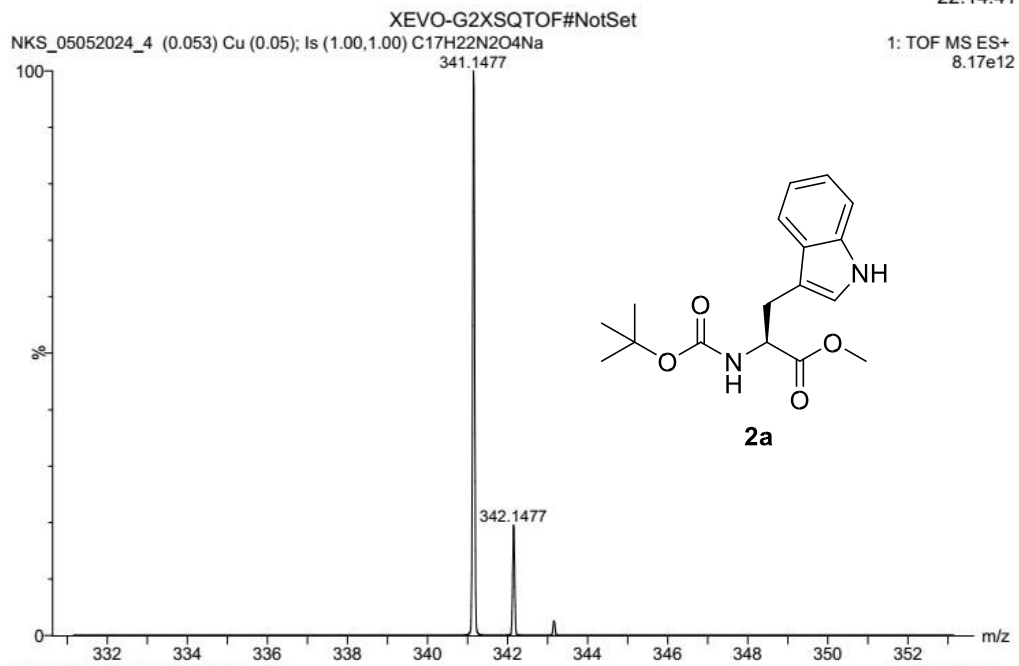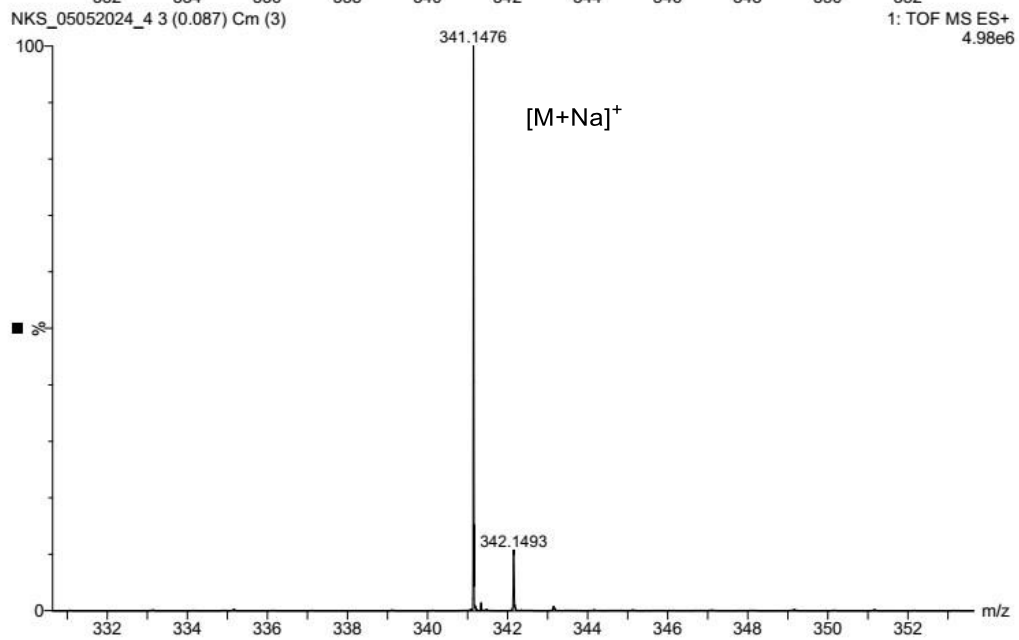

**Fig S2.** ESI-HRMS spectra of tryptophan derivative **2a**.

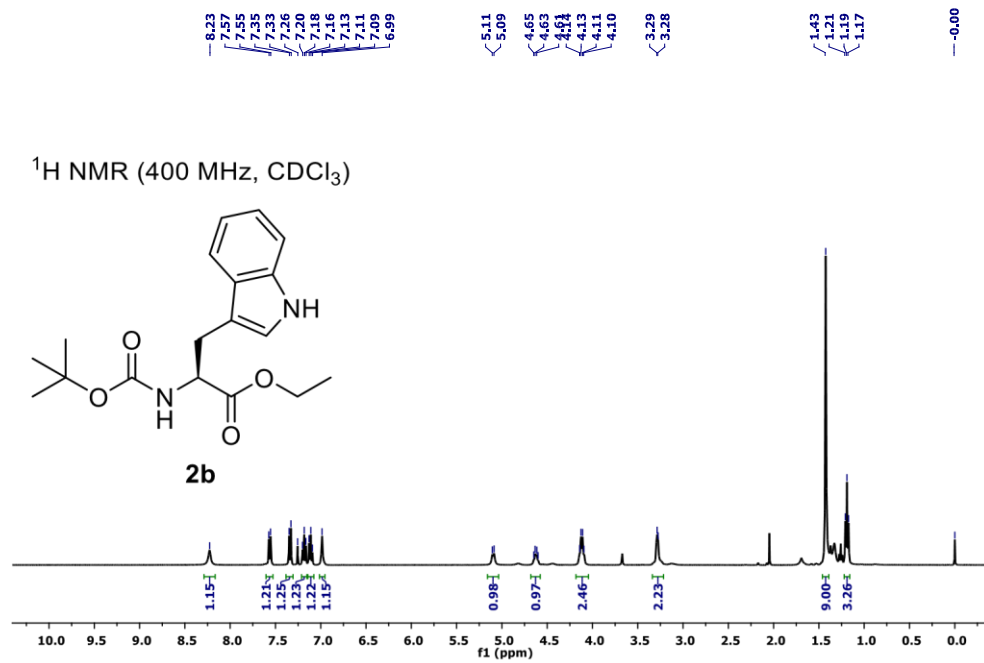

<sup>13</sup>C{<sup>1</sup>H} NMR (101 MHz, CDCl<sub>3</sub>)

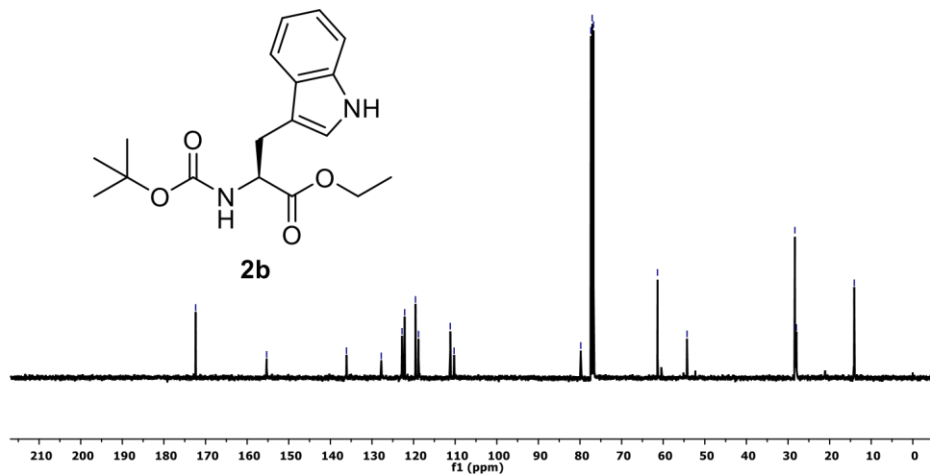

**Fig S3.** <sup>1</sup>H, <sup>13</sup>C {<sup>1</sup>H} NMR spectra of tryptophan derivative **2b**.

5  
7.33  
7.11  
6.99  
7

NKS\_ARP\_40

05-May-2024  
22:14:41

XEVO-G2XSQTOF#NotSet  
NKS\_05052024\_4 (0.053) Cu (0.05); Is (1.00,1.00) C<sub>17</sub>H<sub>22</sub>N<sub>2</sub>O<sub>4</sub>Na

1: TOF MS ES+  
8.17e12

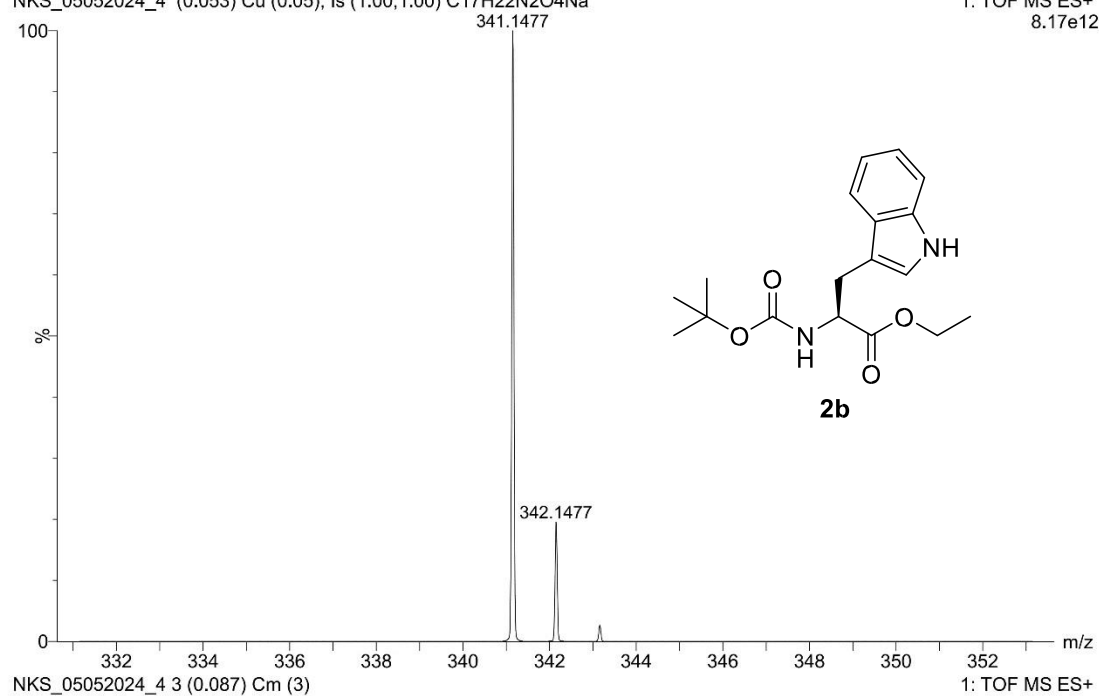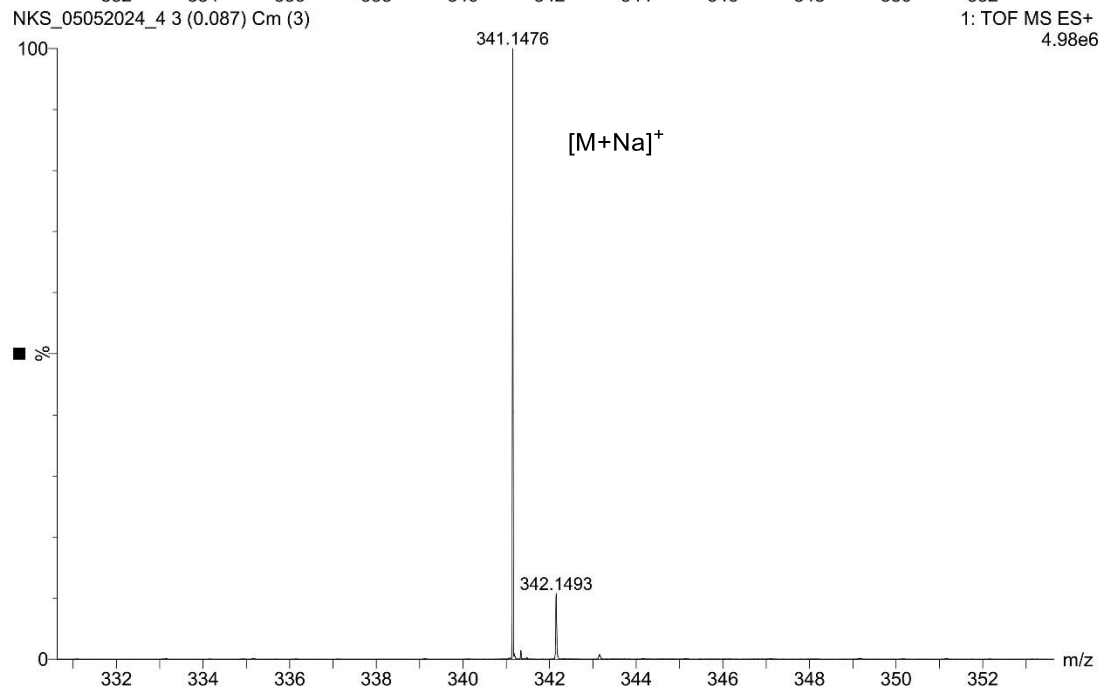

**Fig S4.** ESI-HRMS spectra of tryptophan derivative **2b**.

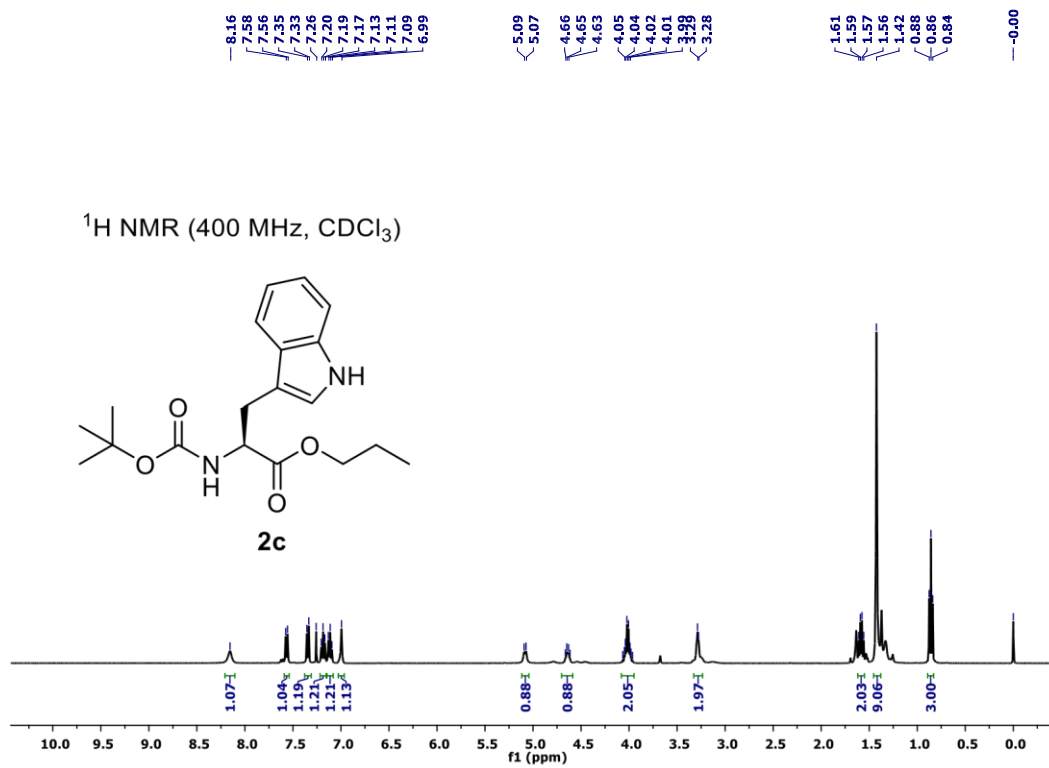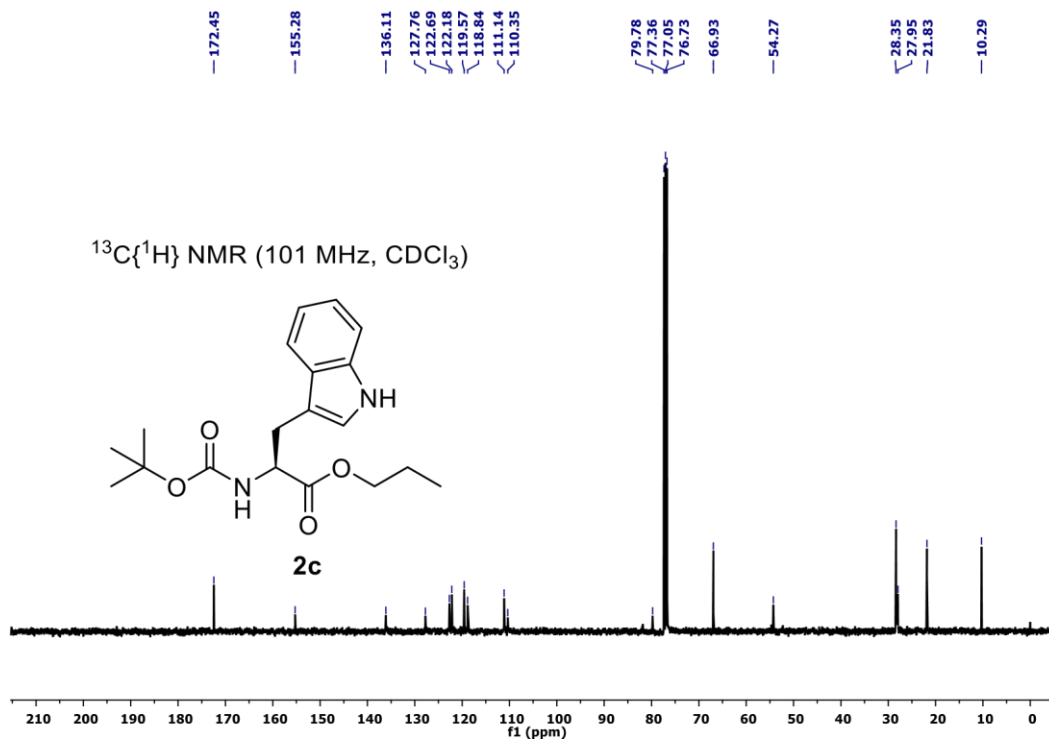



**Fig S5.**  $^1\text{H}$ ,  $^{13}\text{C}$   $\{^1\text{H}\}$  NMR spectra of tryptophan derivative **2c**.

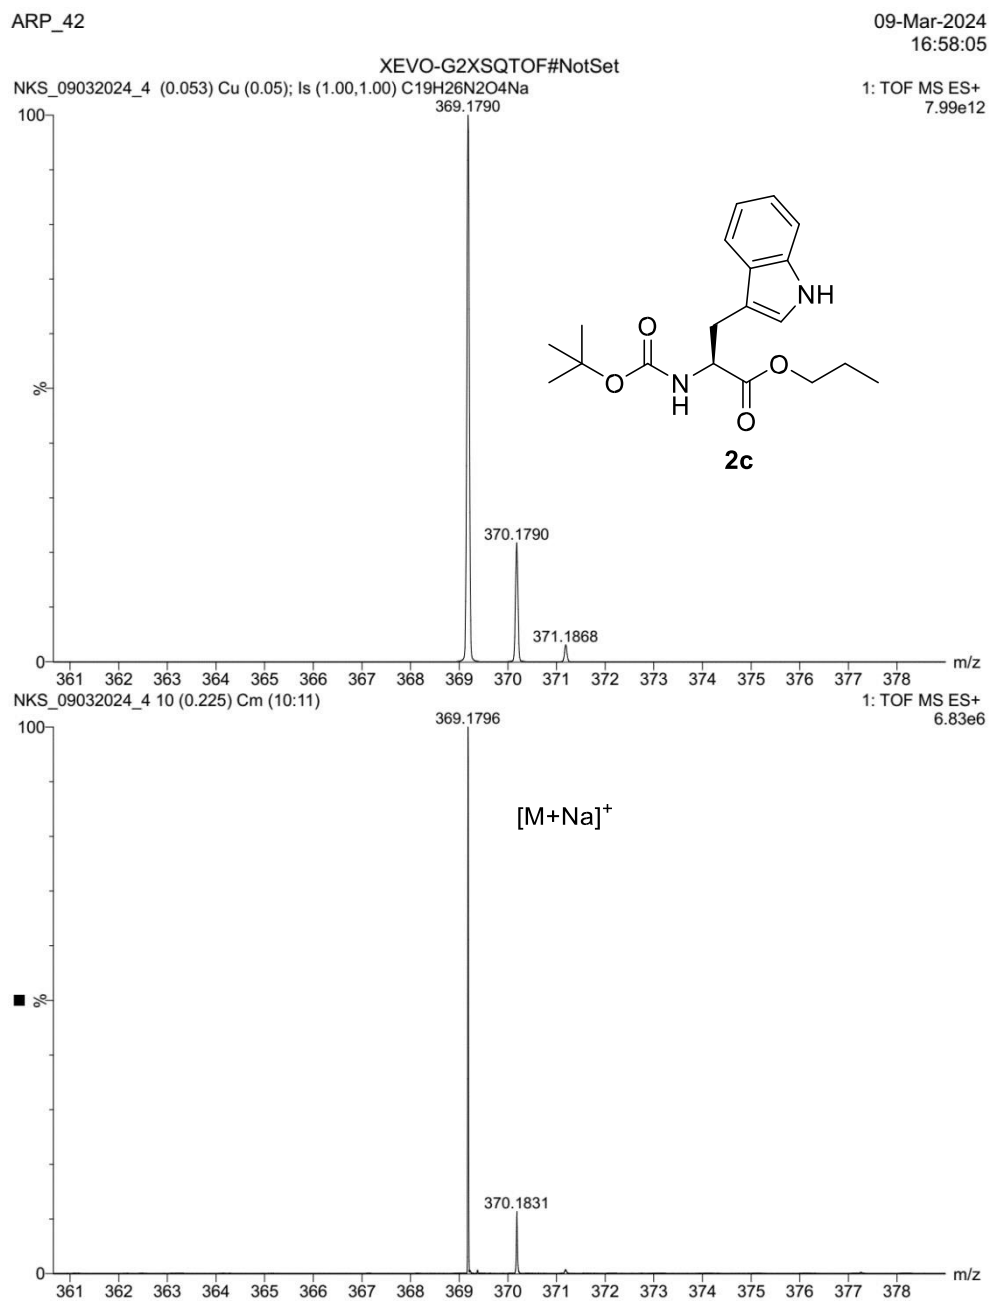

**Fig S6.** ESI-HRMS spectra of tryptophan derivative **2c**.

5  
7.33  
7.11  
6.99  
7

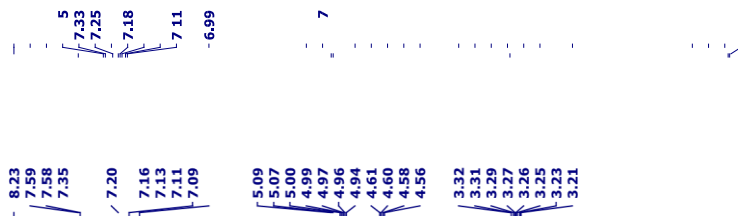

$^1\text{H}$  NMR (400 MHz,  $\text{CDCl}_3$ )

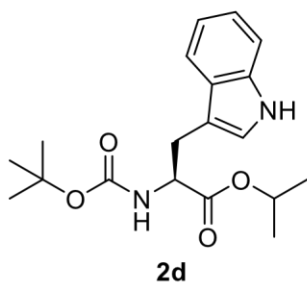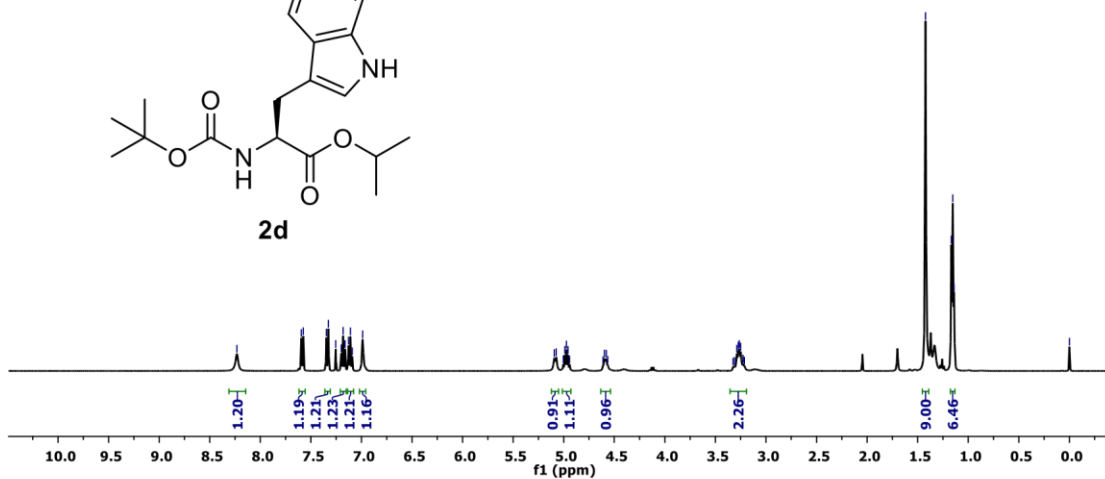

$^{13}\text{C}\{^1\text{H}\}$  NMR (101 MHz,  $\text{CDCl}_3$ )

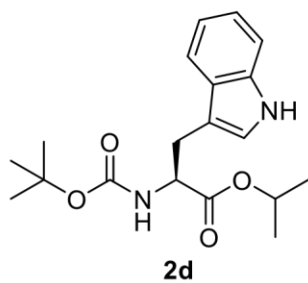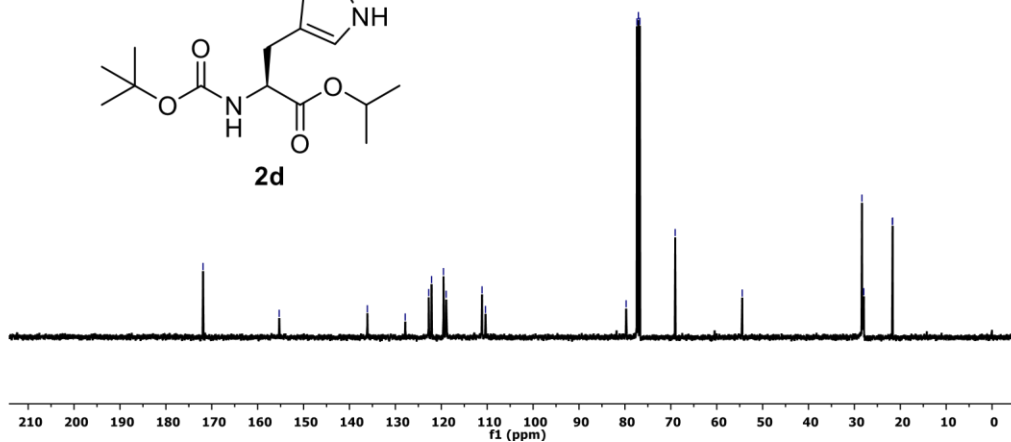

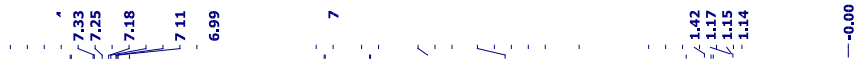

**Fig S7.**  $^1\text{H}$ ,  $^{13}\text{C}$   $\{^1\text{H}\}$  NMR spectra of tryptophan derivative **2d**.

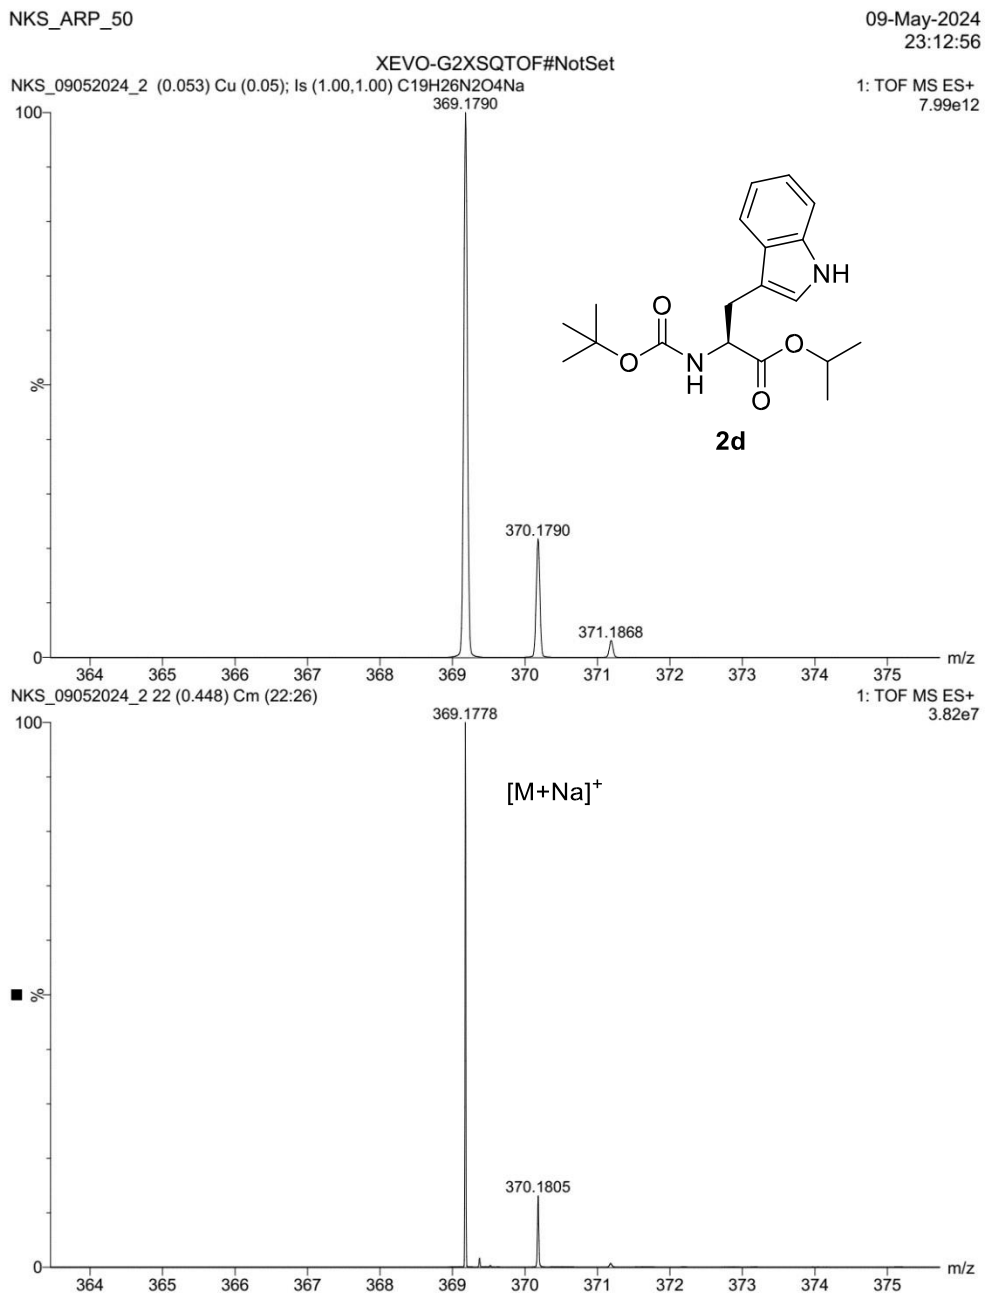

Fig S8. ESI-HRMS spectra of tryptophan derivative **2d**.

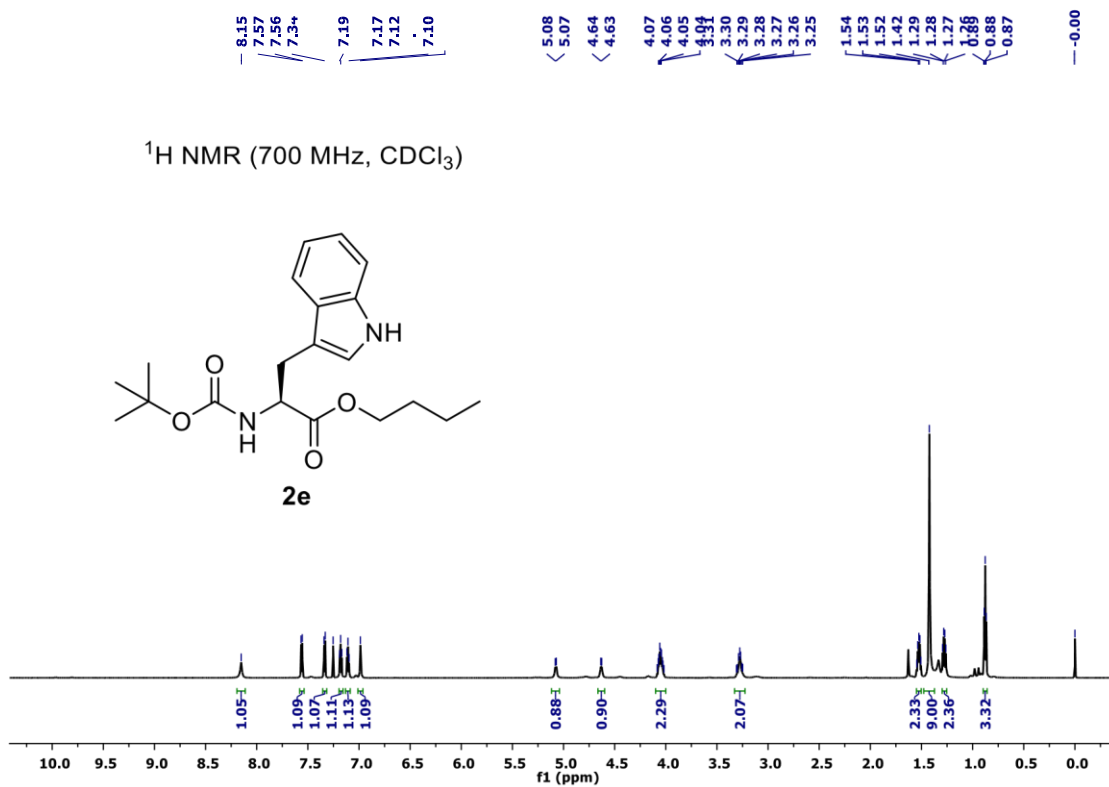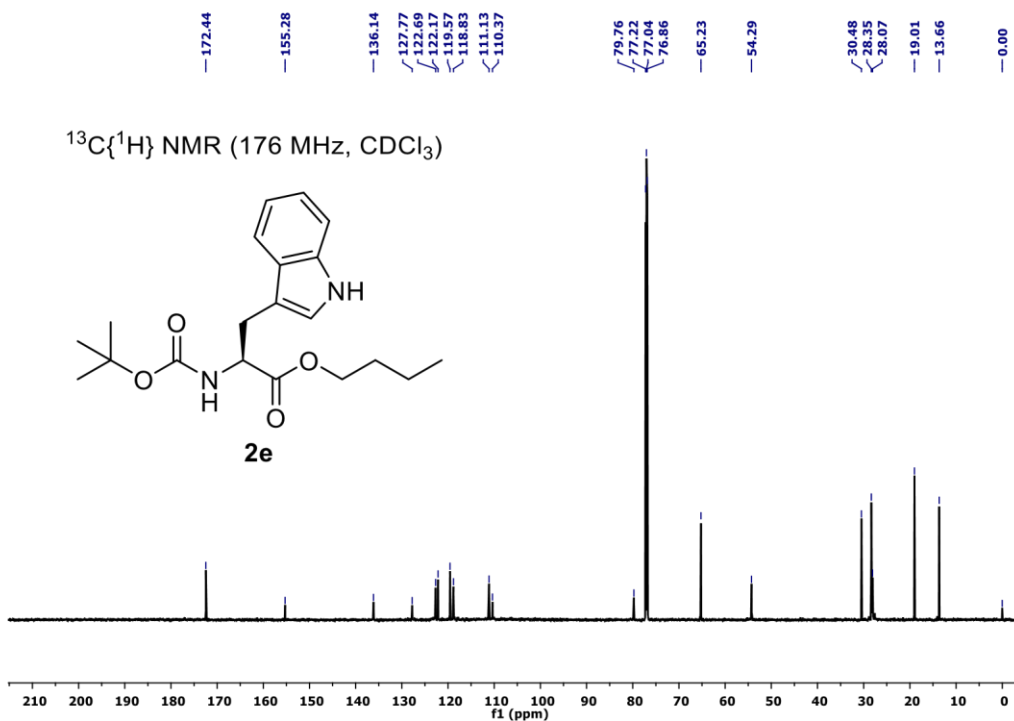

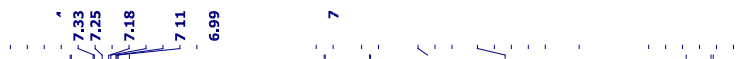

**Fig S9.**  $^1\text{H}$ ,  $^{13}\text{C}$   $\{^1\text{H}\}$  NMR spectra of tryptophan derivative **2e**.

ARP\_47

09-Mar-2024  
20:37:58

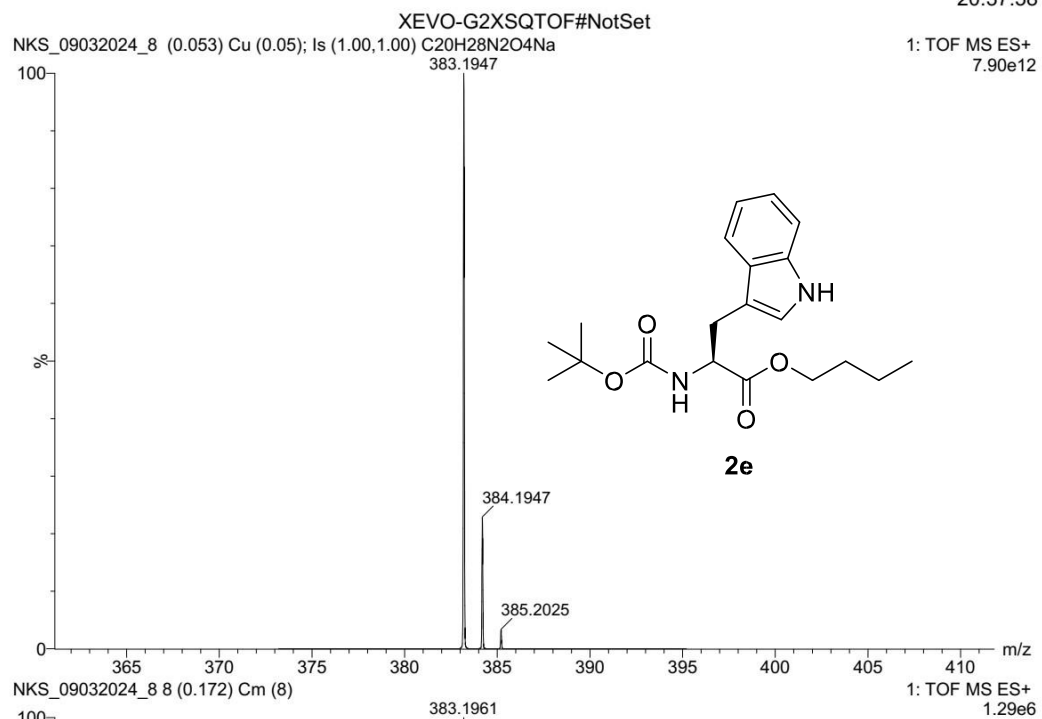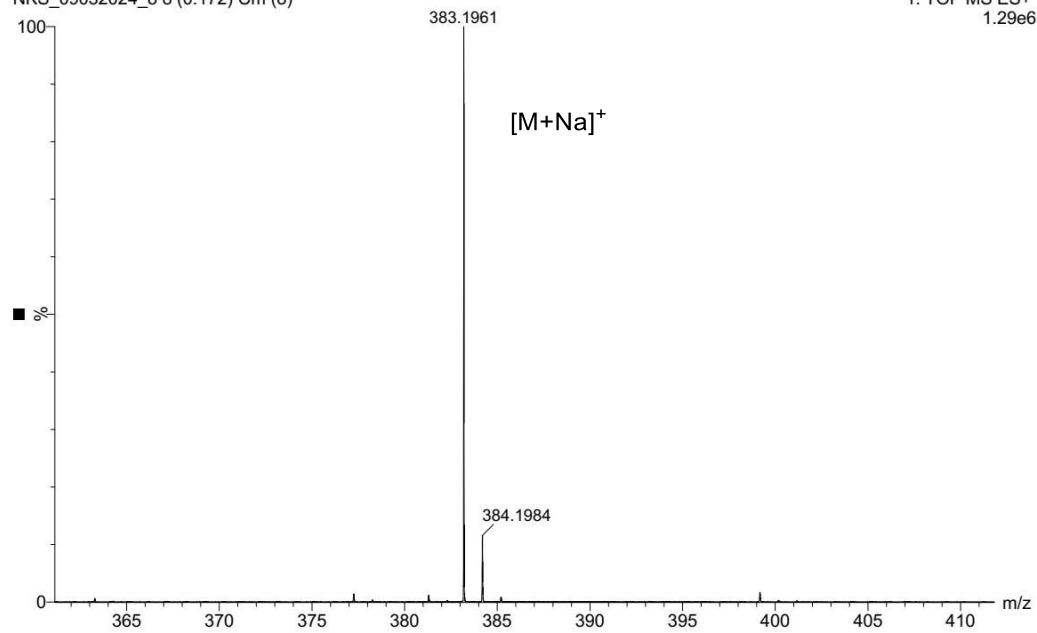

**Fig S10.** ESI-HRMS spectra of tryptophan derivative **2e**.

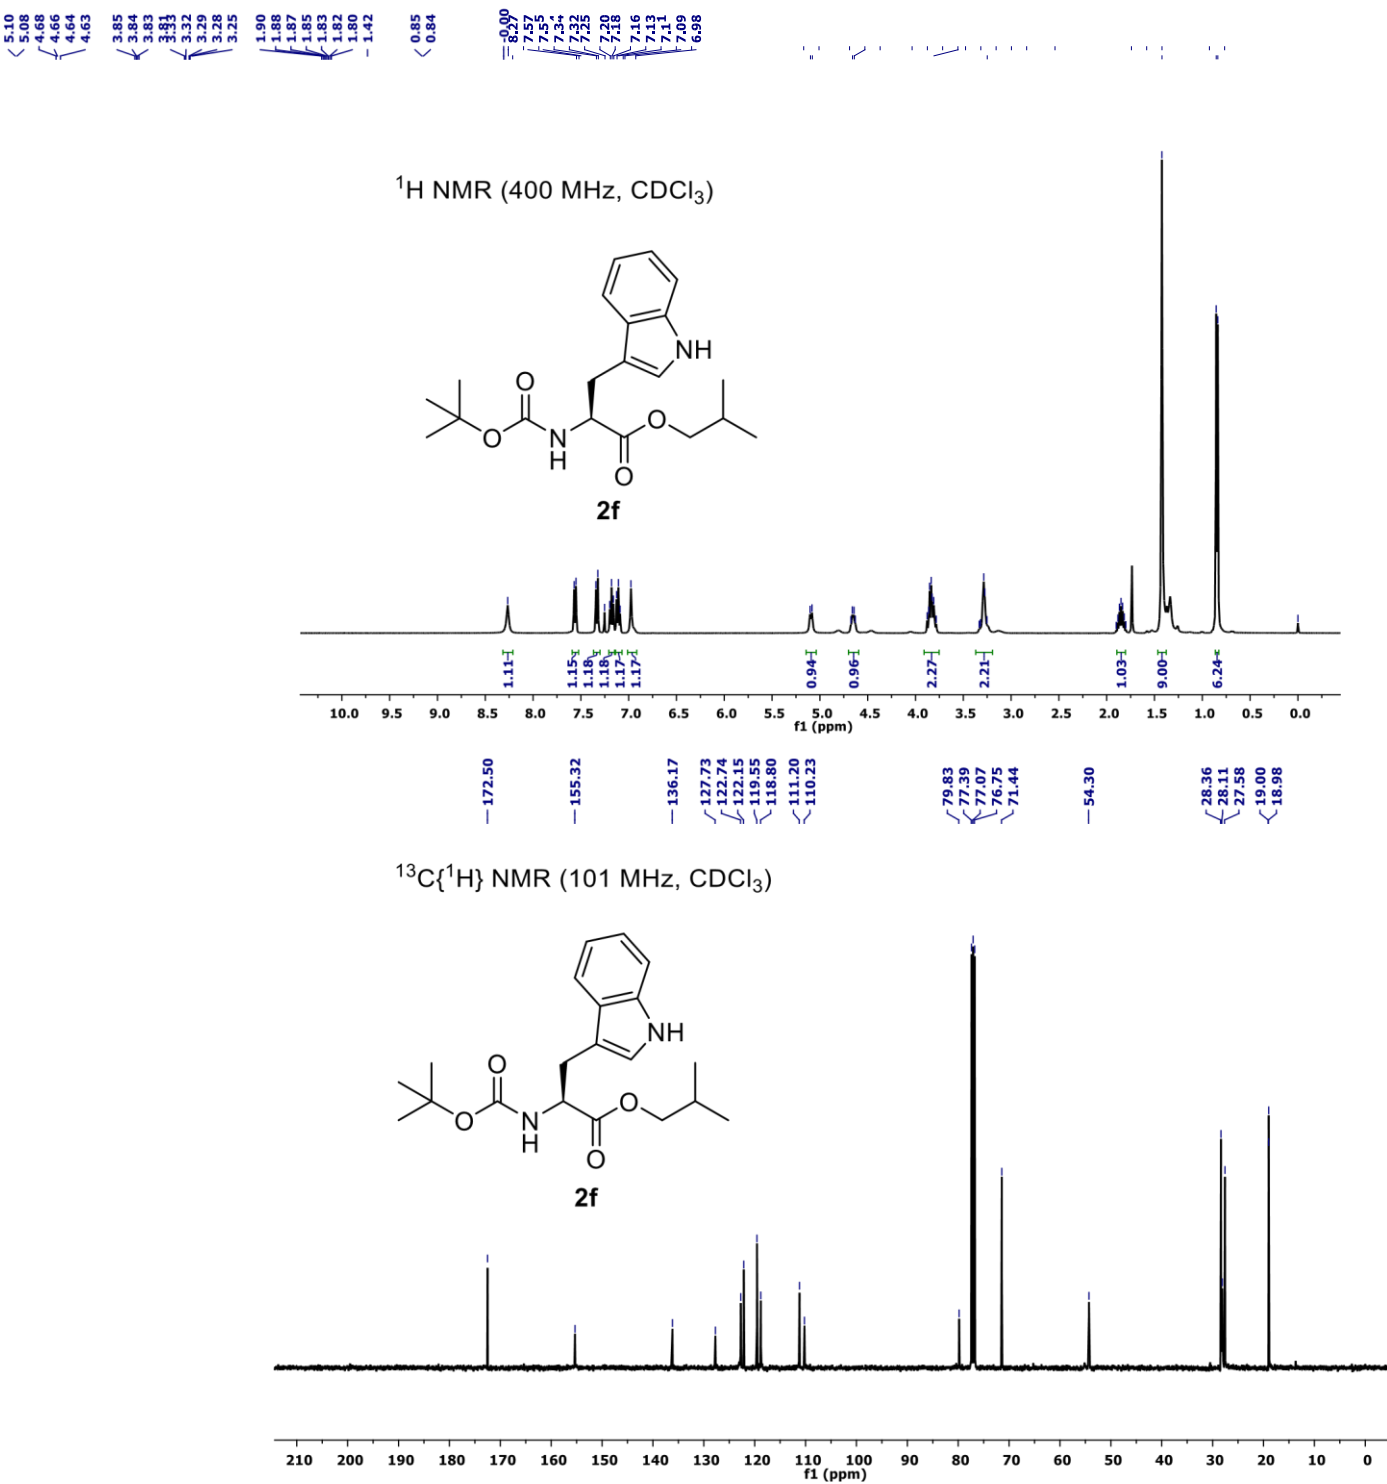

**Fig S11.** <sup>1</sup>H, <sup>13</sup>C {<sup>1</sup>H} NMR spectra of tryptophan derivative **2f**.



NKS\_ARP\_43

06-May-2024  
00:11:15

XEVO-G2XSQTOF#NotSet  
NKS\_05052024\_16 (0.053) Cu (0.05); Is (1.00,1.00) C<sub>20</sub>H<sub>28</sub>N<sub>2</sub>O<sub>4</sub>Na

1: TOF MS ES+  
7.90e12

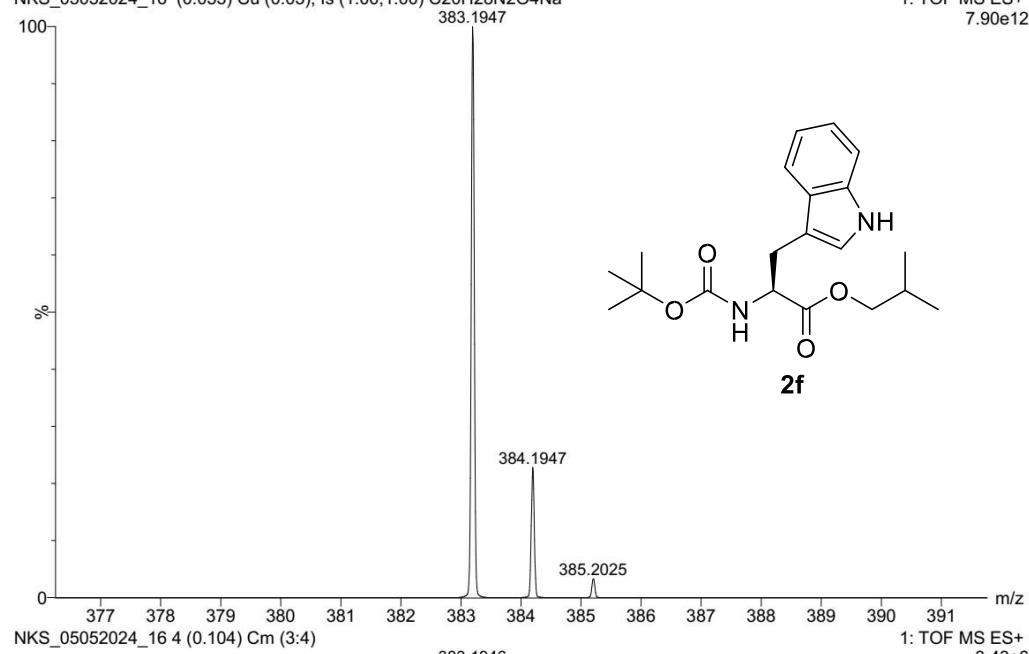

NKS\_05052024\_16 4 (0.104) Cm (3:4)

1: TOF MS ES+  
3.43e6

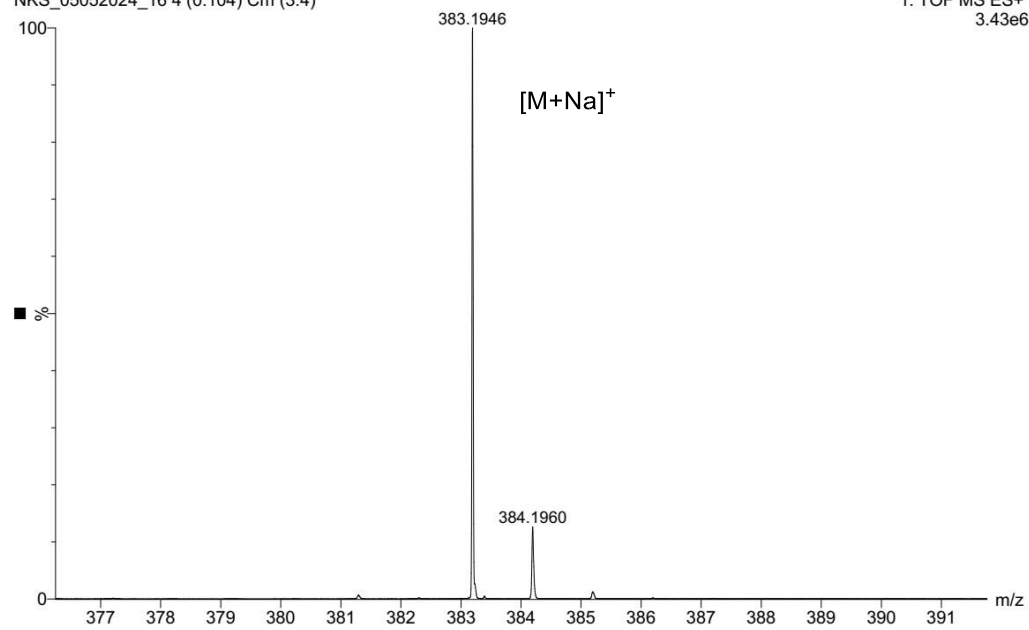

**Fig S12.** ESI-HRMS spectra of tryptophan derivative **2f**.

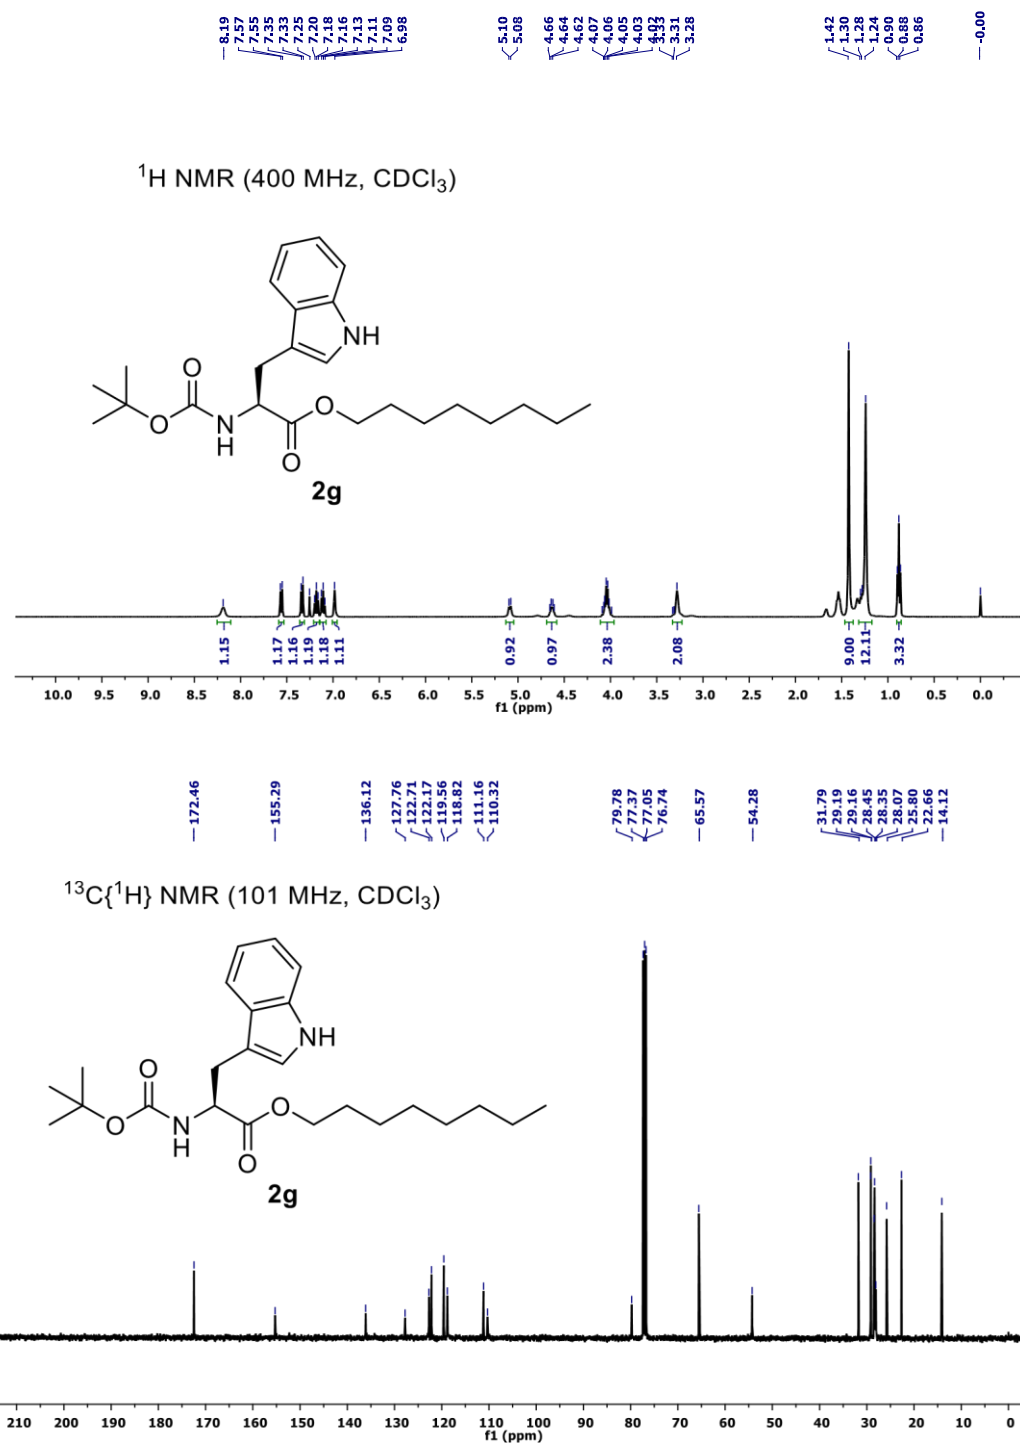

**Fig S13.** <sup>1</sup>H, <sup>13</sup>C {<sup>1</sup>H} NMR spectra of tryptophan derivative **2g**.

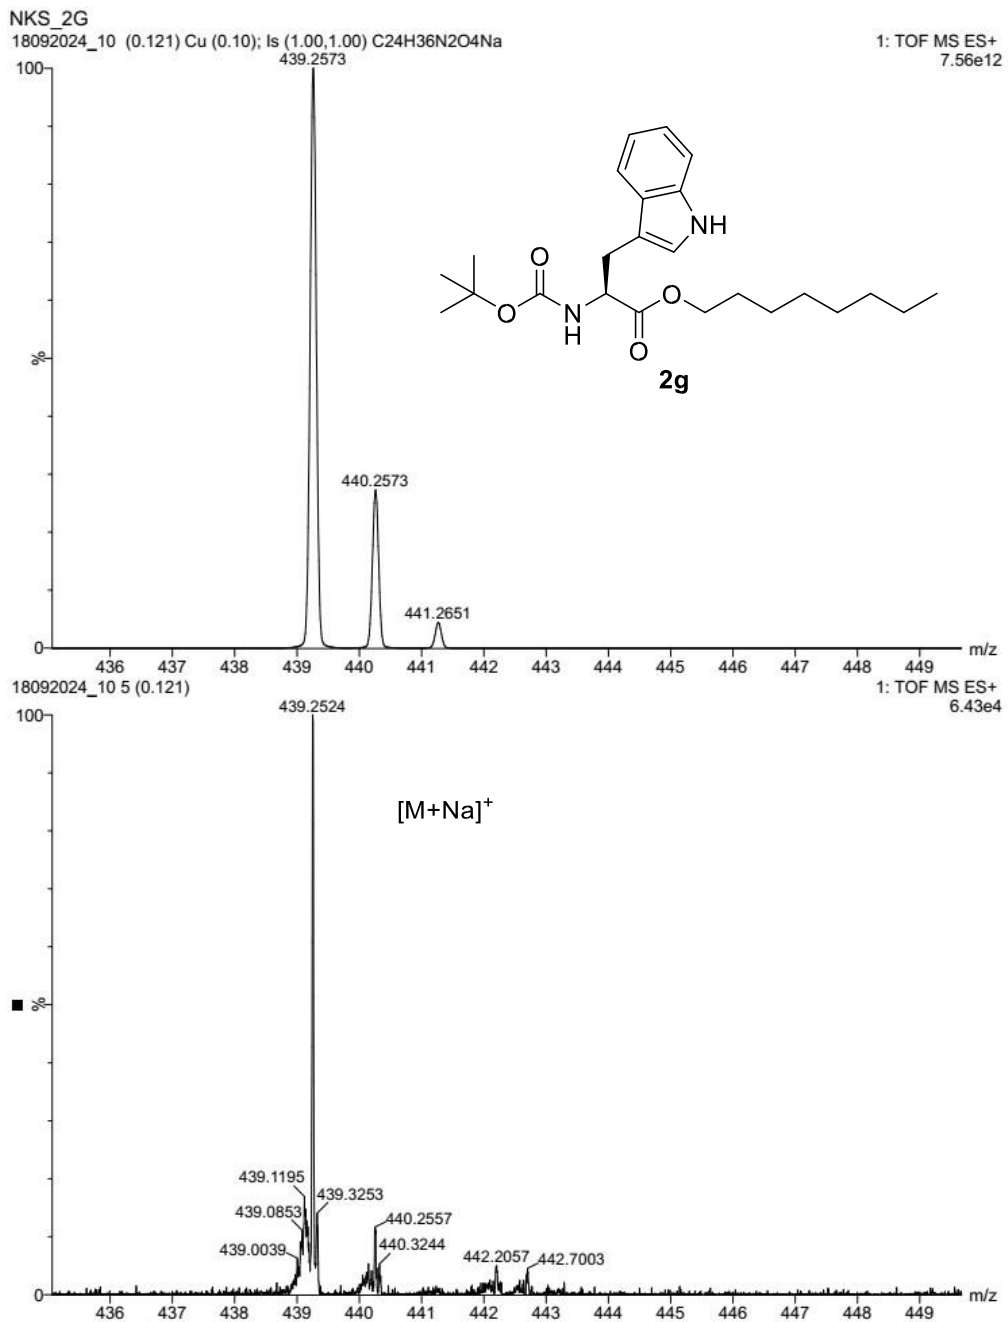

**Fig S14.** ESI-HRMS spectra of tryptophan derivative **2g**.

57 5

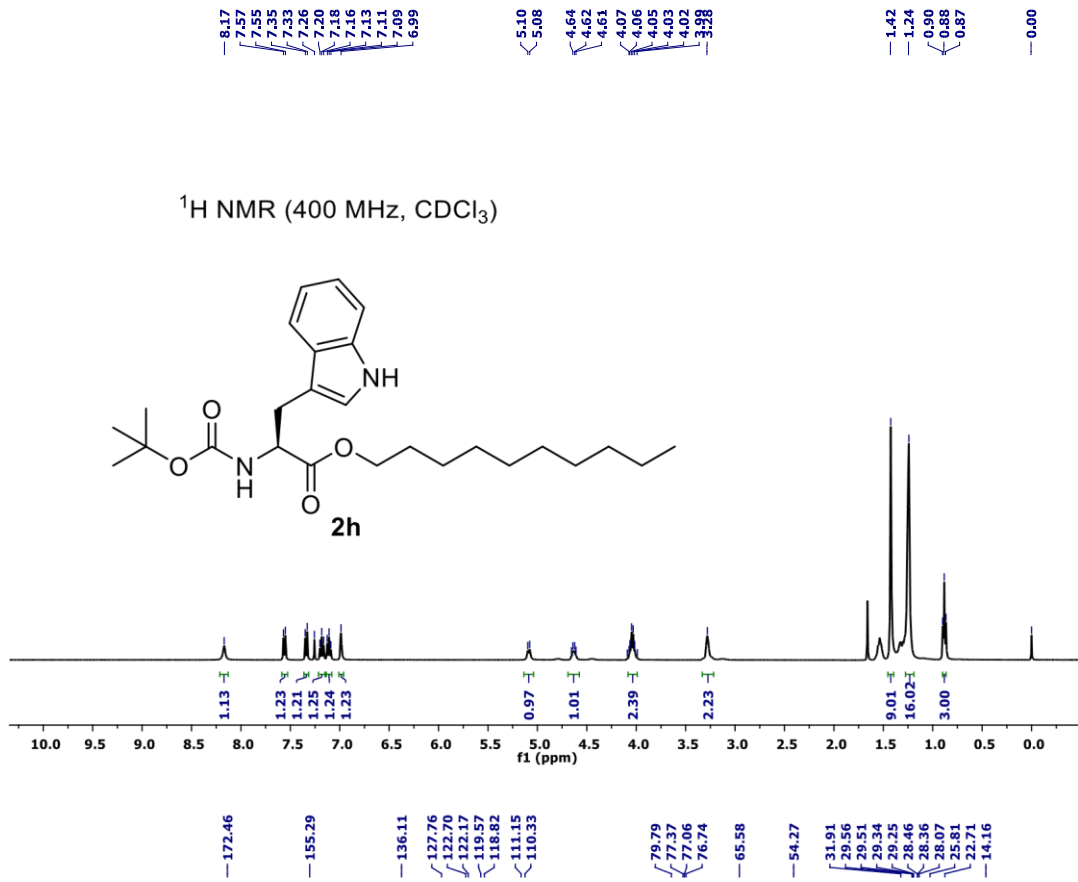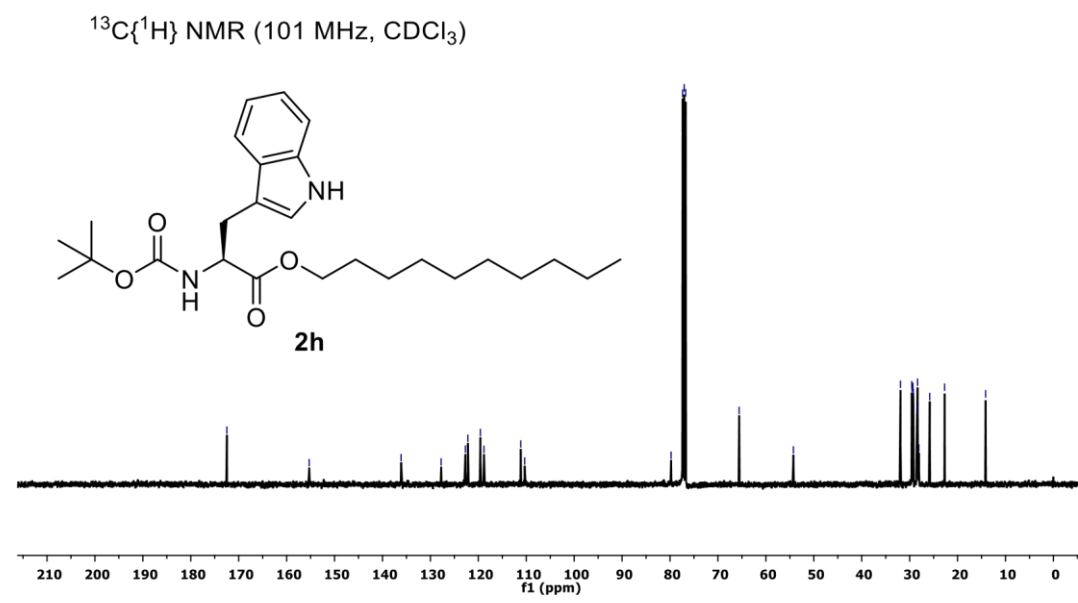

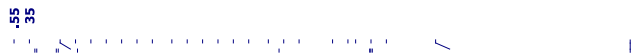

**Fig S15.**  $^1\text{H}$ ,  $^{13}\text{C}$   $\{^1\text{H}\}$  NMR spectra of tryptophan derivative **2h**.

NKS\_CKJ\_DECYL

29-Jun-2024  
17:04:28

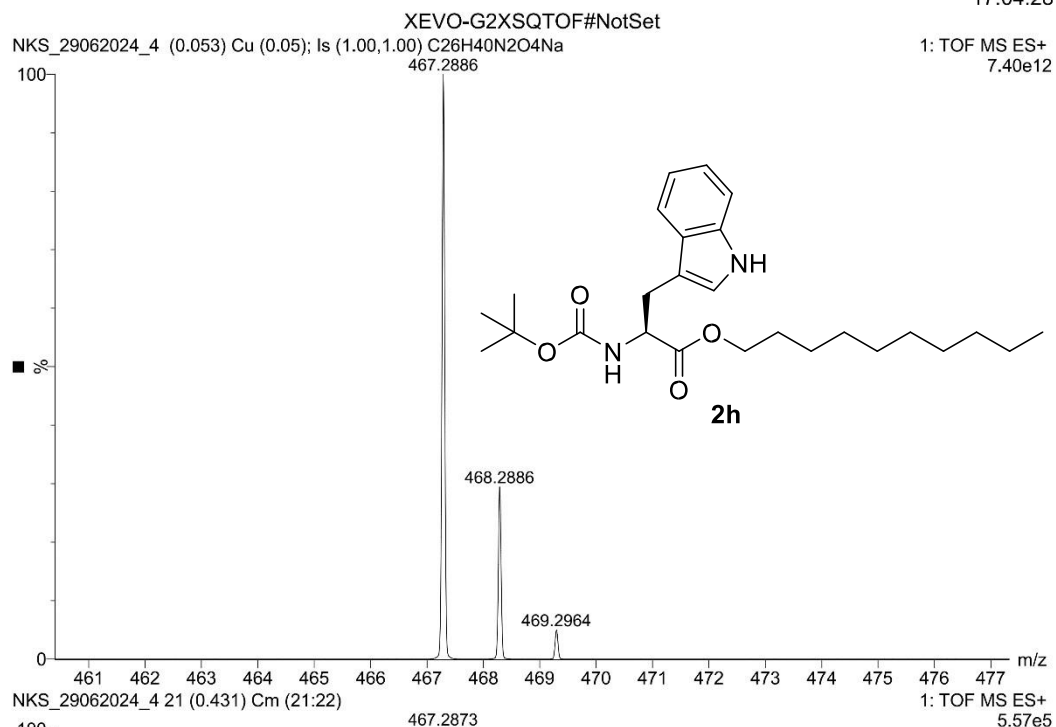

**Fig S16.** ESI-HRMS spectra of tryptophan derivative **2h**.

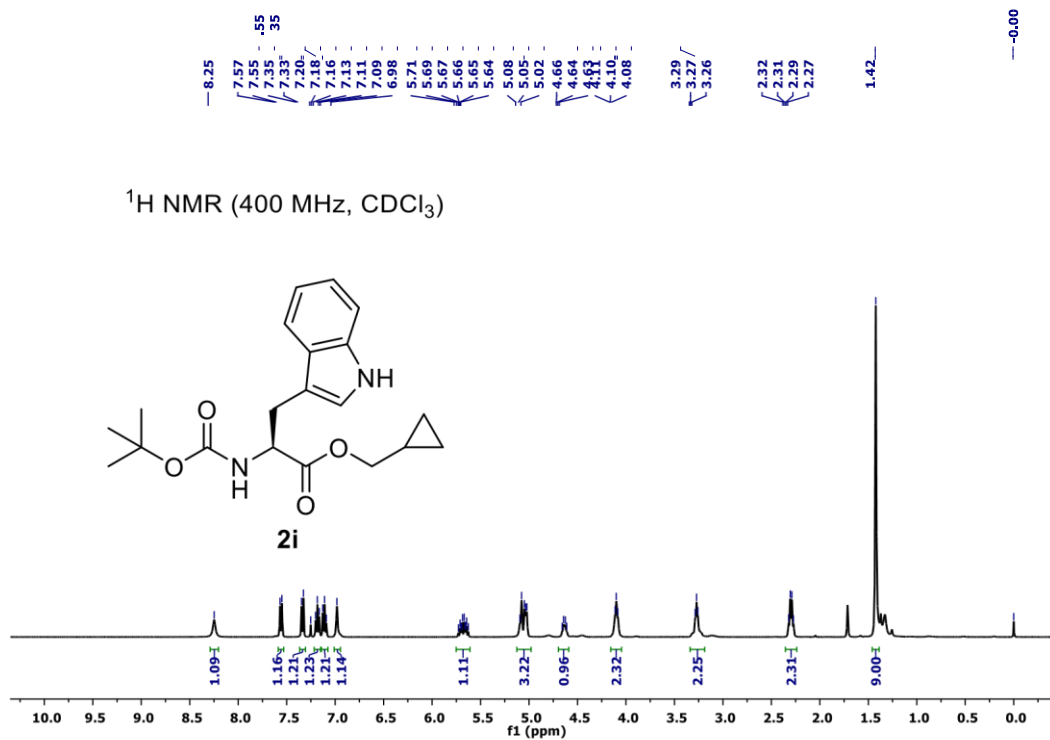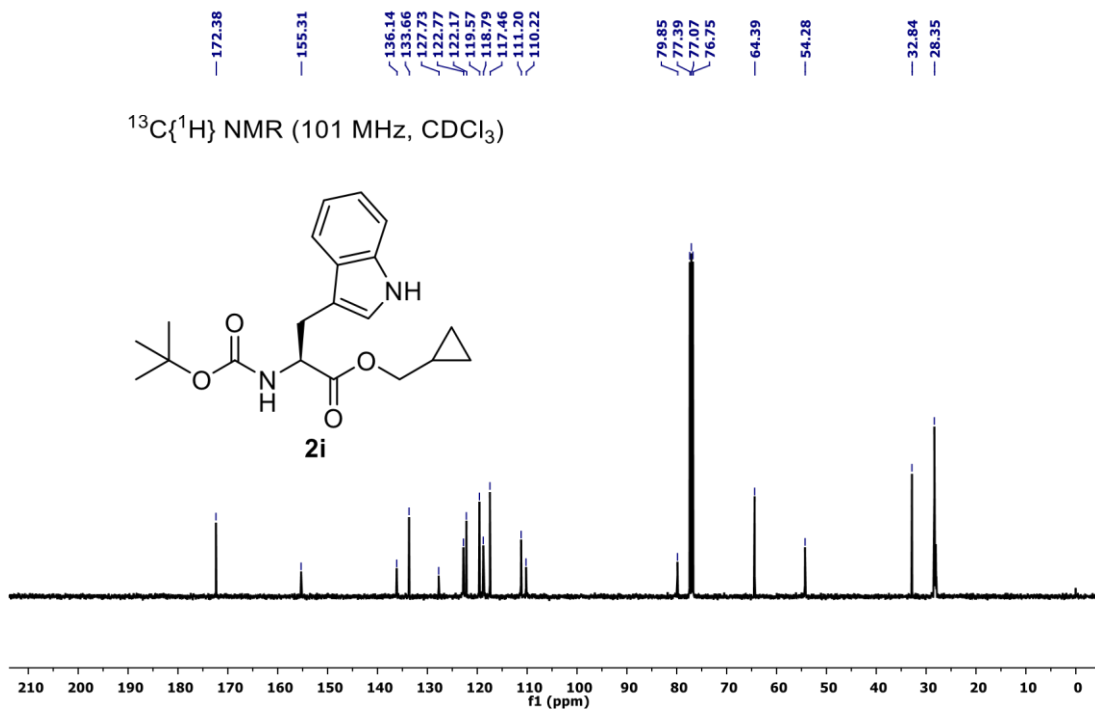

Fig S17. <sup>1</sup>H, <sup>13</sup>C {<sup>1</sup>H} NMR spectra of tryptophan derivative **2i**.



NKS\_CKJ\_1438

10-May-2024  
00:15:41

XEVO-G2XSQTOF#NotSet

NKS\_09052024\_8 (0.053) Cu (0.05); Is (1.00,1.00) C<sub>20</sub>H<sub>26</sub>N<sub>2</sub>O<sub>4</sub>Na

1: TOF MS ES+  
7.90e12

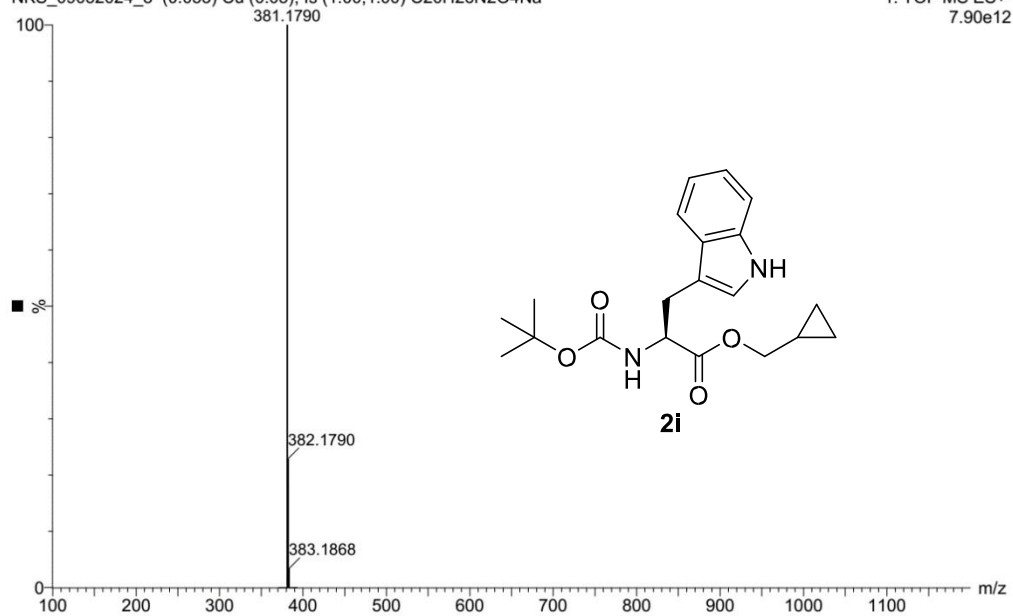

NKS\_09052024\_8 48 (0.947) Cm (47:48)

1: TOF MS ES+  
8.41e6

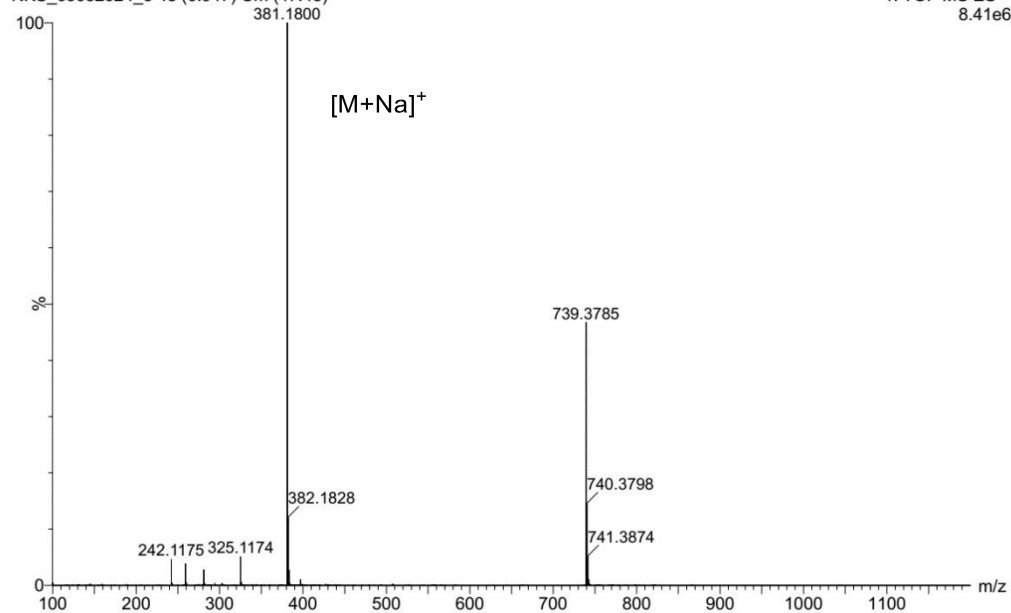

**Fig S18.** ESI-HRMS spectra of tryptophan derivative **2i**.

8.08, 7.55, 7.53, 7.34, 7.33, 7.32, 7.25, 7.24, 7.23, 7.20, 7.18, 7.12, 7.10, 6.79, 6.12, 5.09, 5.04, 4.72, 4.70, 4.68, 4.67, 55, 55, 3.29, 3.28, -1.42, -0.00

<sup>1</sup>H NMR (400 MHz, CDCl<sub>3</sub>)

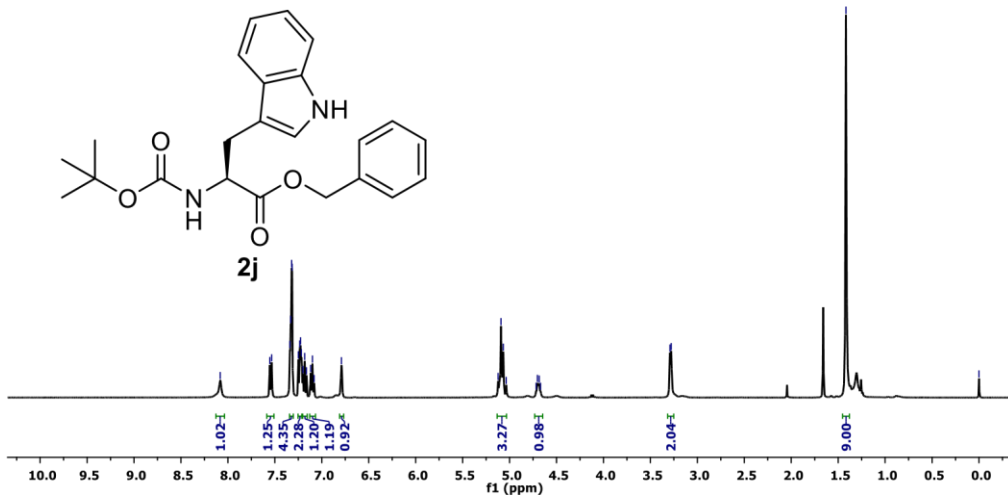

172.21, 155.28, 136.10, 135.36, 128.56, 128.47, 128.37, 128.26, 117.89, 110.04, 79.88, 77.38, 77.06, 76.74, 67.08, 54.33, 28.35, 27.99

<sup>13</sup>C{<sup>1</sup>H} NMR (101 MHz, CDCl<sub>3</sub>)

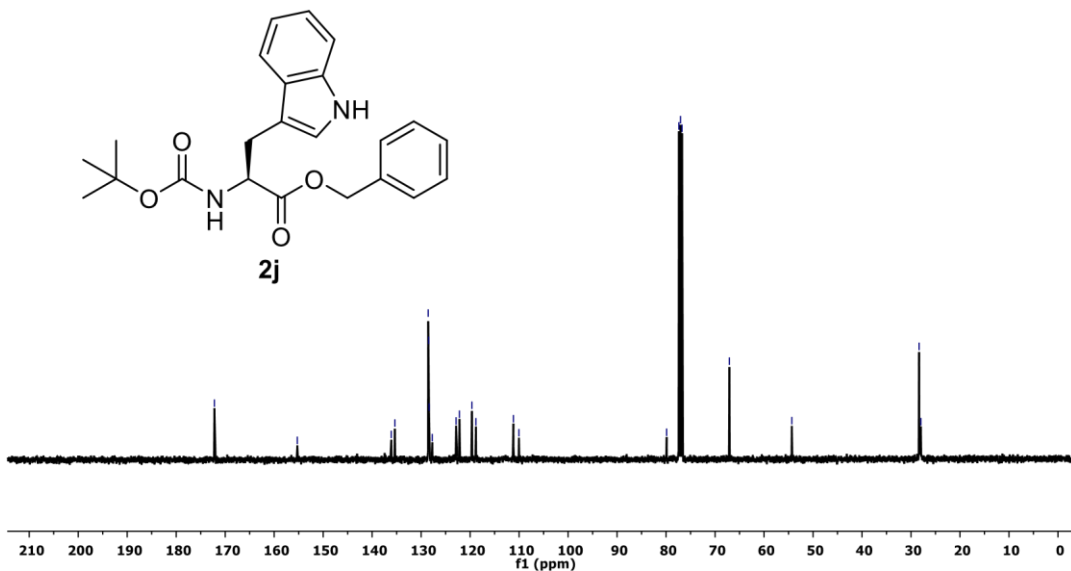

**Fig S19.**  $^1\text{H}$ ,  $^{13}\text{C}$   $\{^1\text{H}\}$  NMR spectra of tryptophan derivative **2j**.

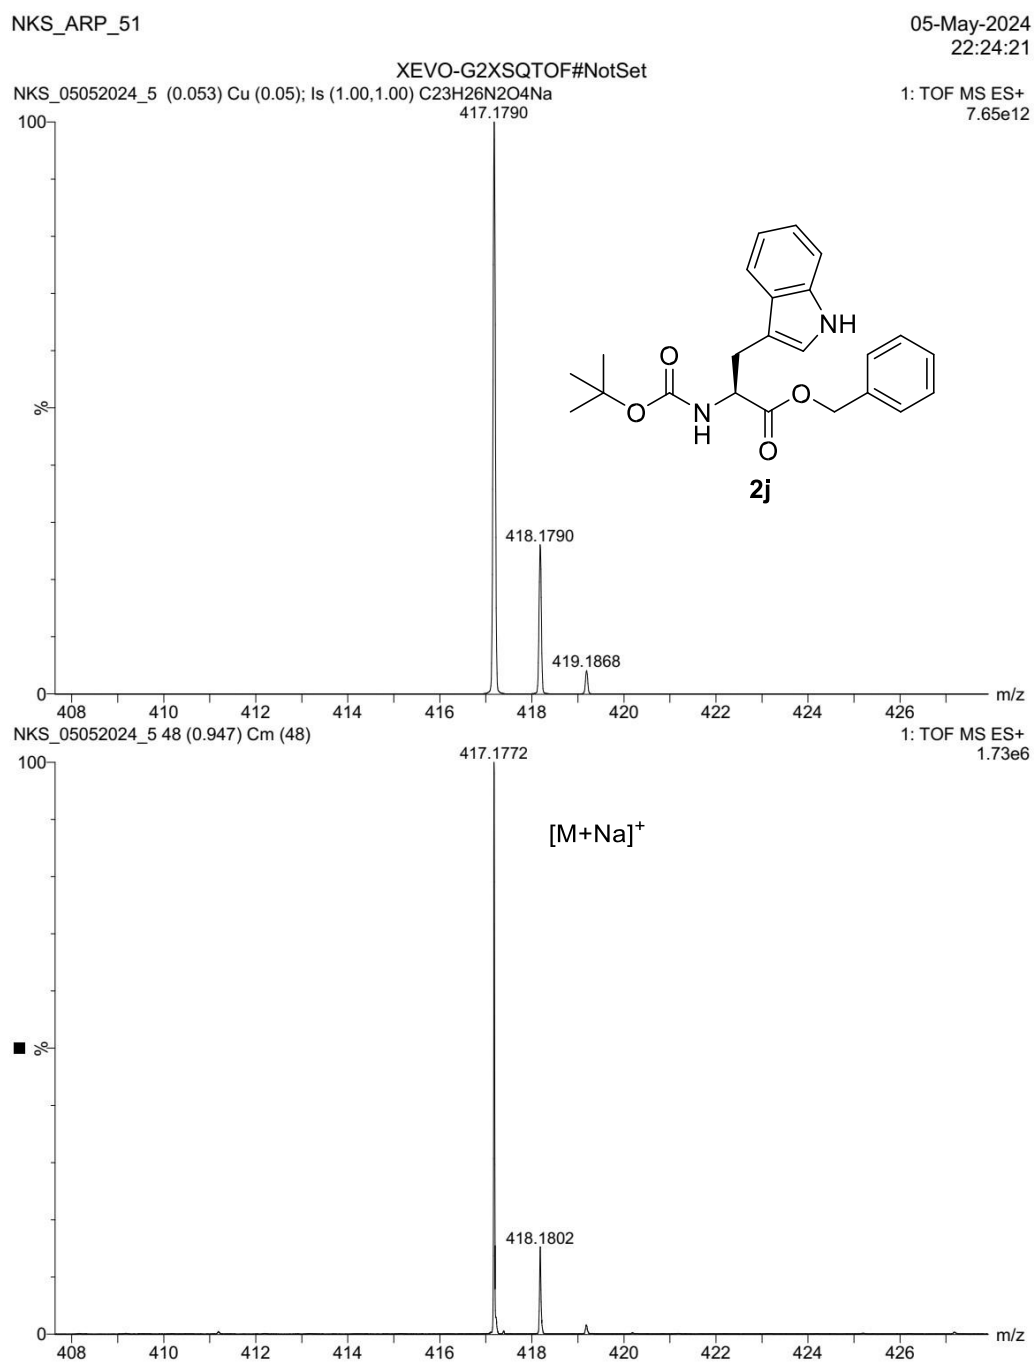

**Fig S20.** ESI-HRMS spectra of tryptophan derivative **2j**.

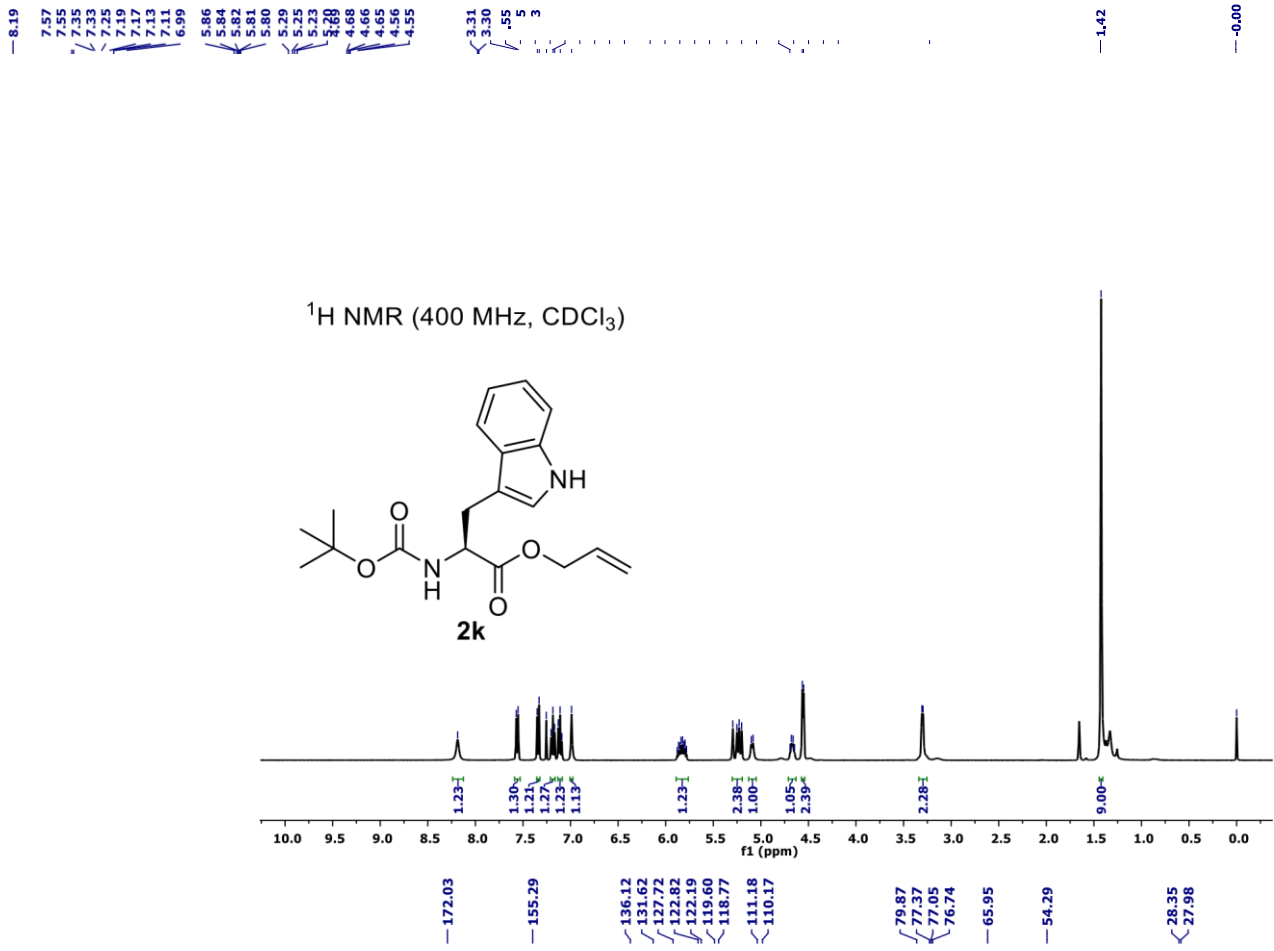

**Fig** <sup>1</sup>H, <sup>13</sup>C {<sup>1</sup>H} NMR spectra of tryptophan derivative

$^{13}\text{C}\{^1\text{H}\}$  NMR (101 MHz,  $\text{CDCl}_3$ )

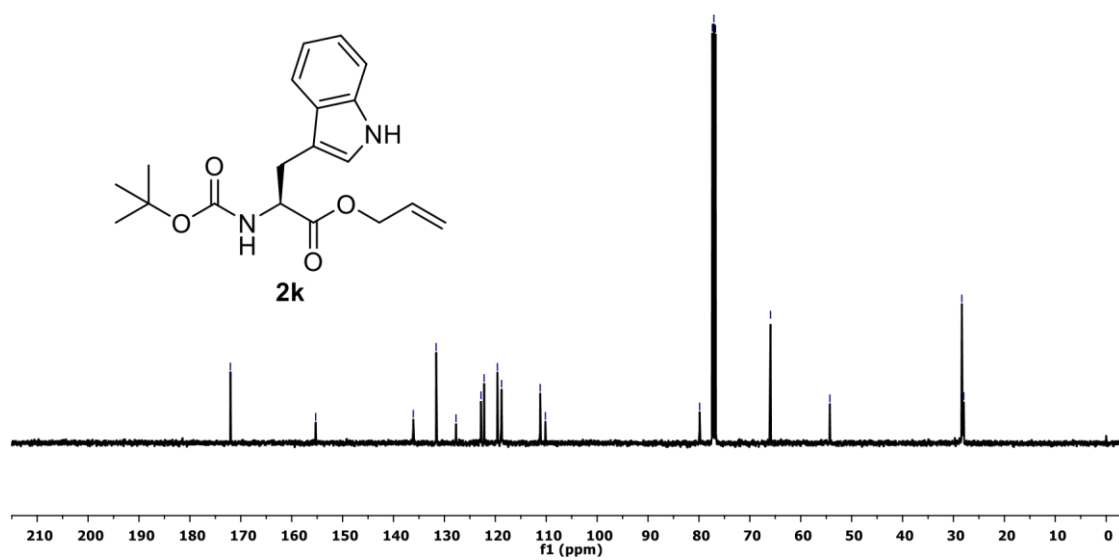

S21.

2k.

5.5 3

NKS\_CKJ\_1414

05-May-2024  
22:32:18

XEVO-G2XSQTOF#NotSet

NKS\_05052024\_6 (0.053) Cu (0.05); Is (1.00,1.00) C<sub>19</sub>H<sub>24</sub>N<sub>2</sub>O<sub>4</sub>Na

1: TOF MS ES+  
7.99e12

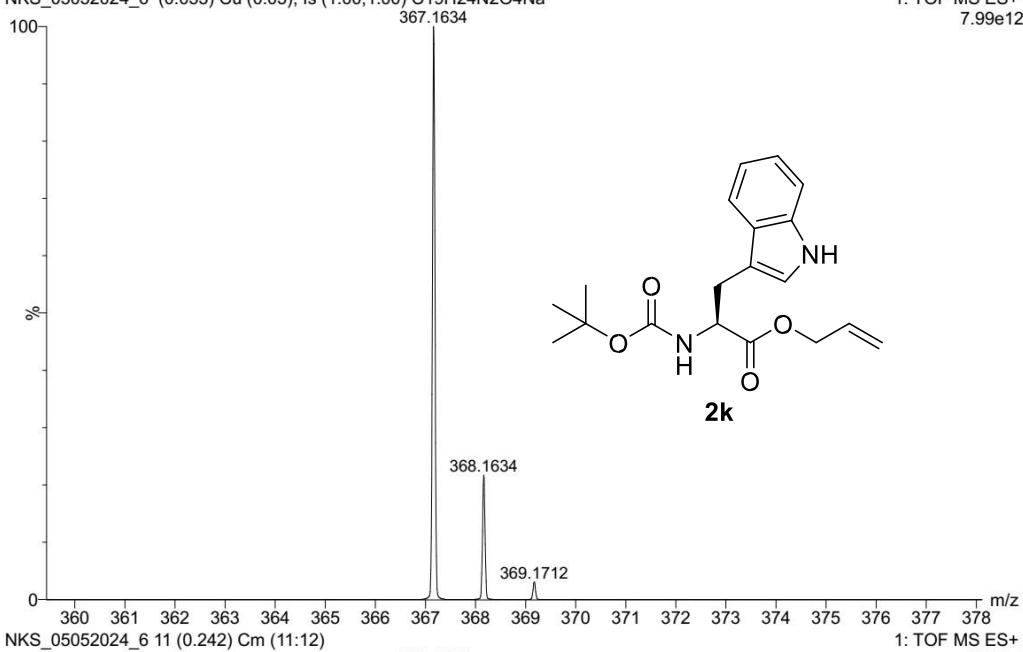

NKS\_05052024\_6 11 (0.242) Cm (11:12)

1: TOF MS ES+  
9.97e6

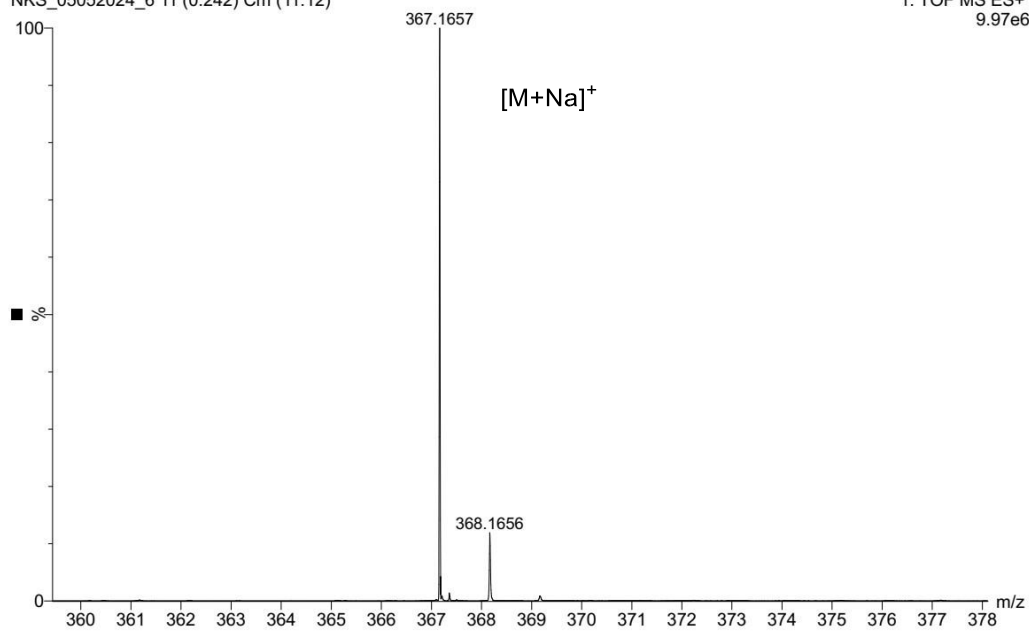

Fig

**Fig S22.** ESI-HRMS spectra of tryptophan derivative **2k**.

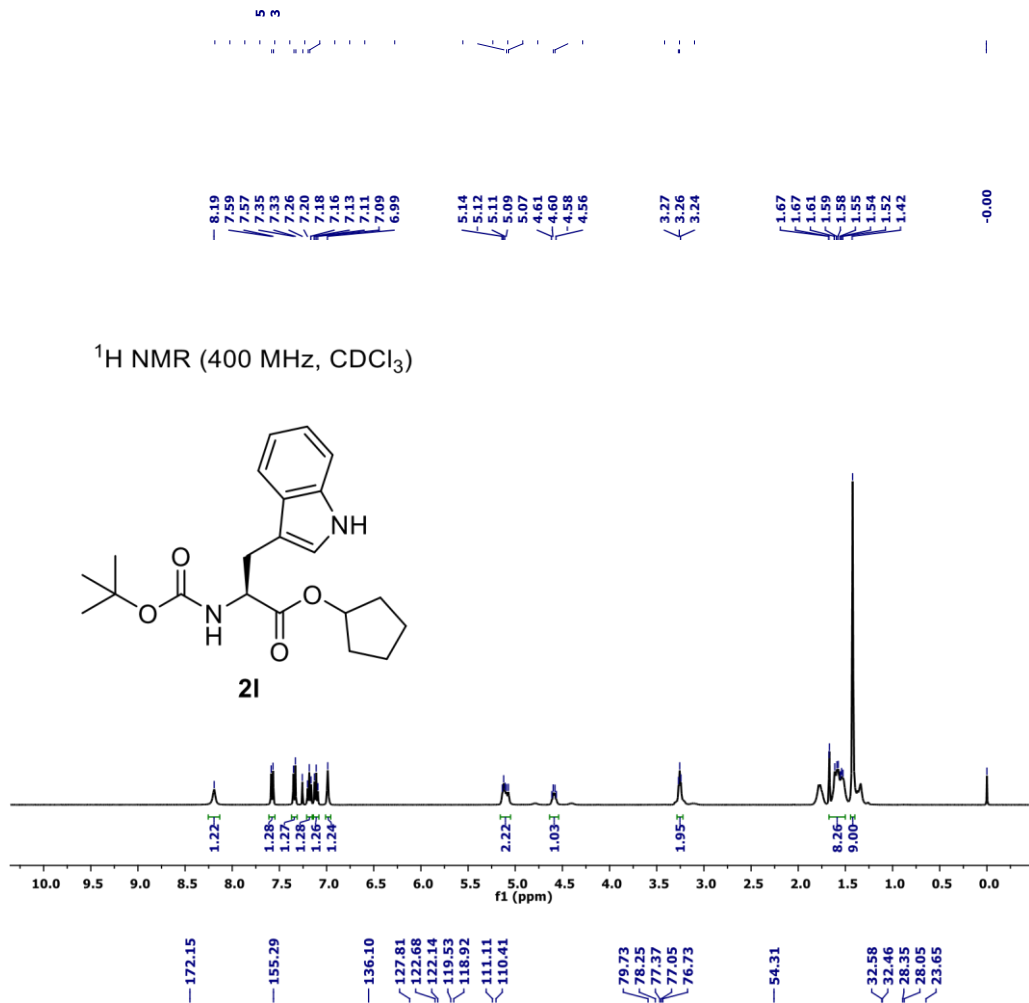

**Fig** <sup>1</sup>H, <sup>13</sup>C {<sup>1</sup>H} NMR spectra of tryptophan derivative



$^{13}\text{C}\{^1\text{H}\}$  NMR (101 MHz,  $\text{CDCl}_3$ )

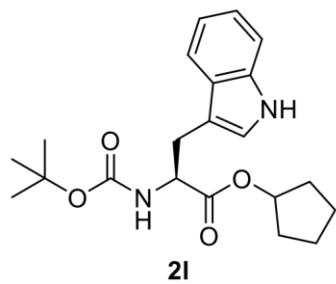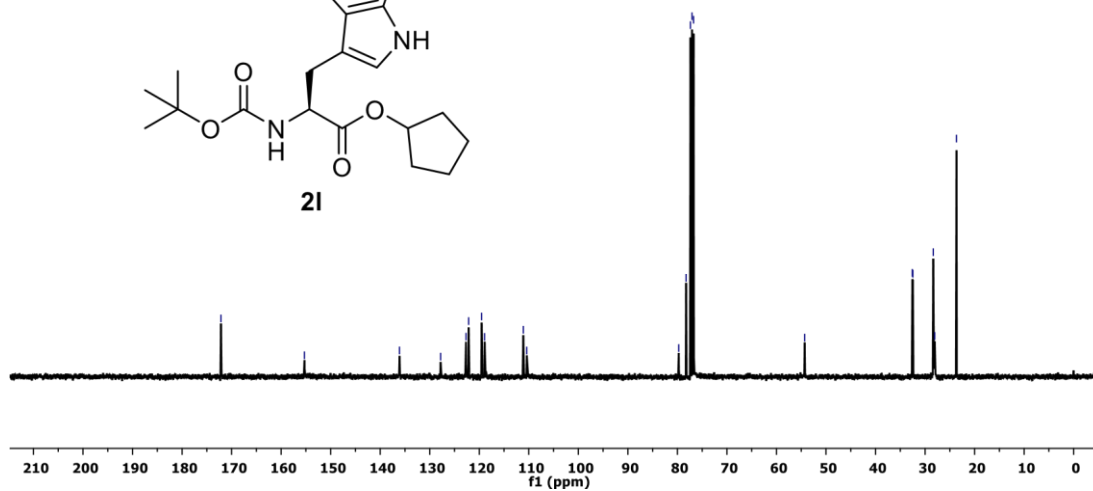

S23.

21.

NKS\_CKJ\_1437

10-May-2024  
00:07:02

XEVO-G2XSQTOF#NotSet

NKS\_09052024\_7 (0.053) Cu (0.05); Is (1.00,1.00) C<sub>21</sub>H<sub>28</sub>N<sub>2</sub>O<sub>4</sub>Na

1: TOF MS ES+  
7.82e12

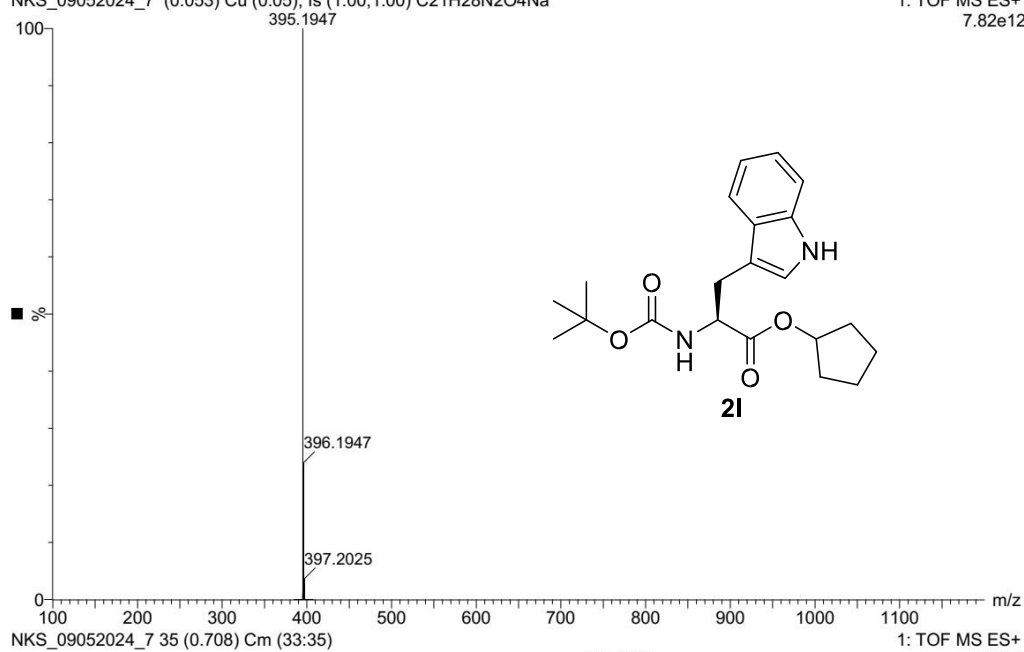

NKS\_09052024\_7 35 (0.708) Cm (33:35)

1: TOF MS ES+  
1.33e7

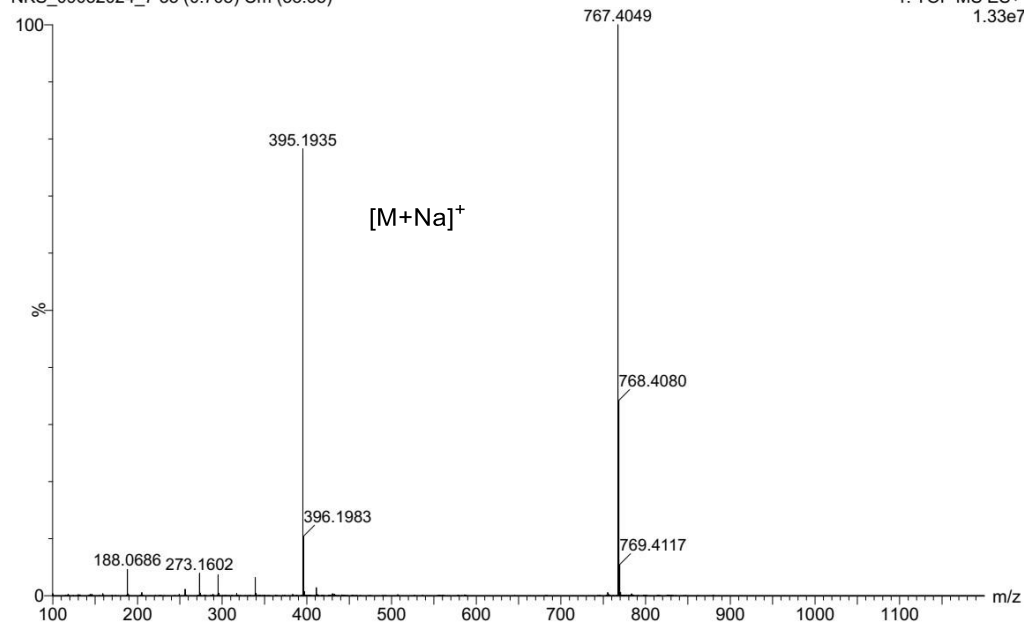

Fig

11, 12, 13, 14, 15, 16, 17, 18, 19, 20, 21, 22, 23, 24, 25, 26, 27, 28, 29, 30, 31, 32, 33, 34, 35, 36, 37, 38, 39, 40, 41, 42, 43, 44, 45, 46, 47, 48, 49, 50, 51, 52, 53, 54, 55, 56, 57, 58, 59, 60, 61, 62, 63, 64, 65, 66, 67, 68, 69, 70, 71, 72, 73, 74, 75, 76, 77, 78, 79, 80, 81, 82, 83, 84, 85, 86, 87, 88, 89, 90, 91, 92, 93, 94, 95, 96, 97, 98, 99, 100

Fig S24. ESI-HRMS spectra of tryptophan derivative 2l.

-0.00

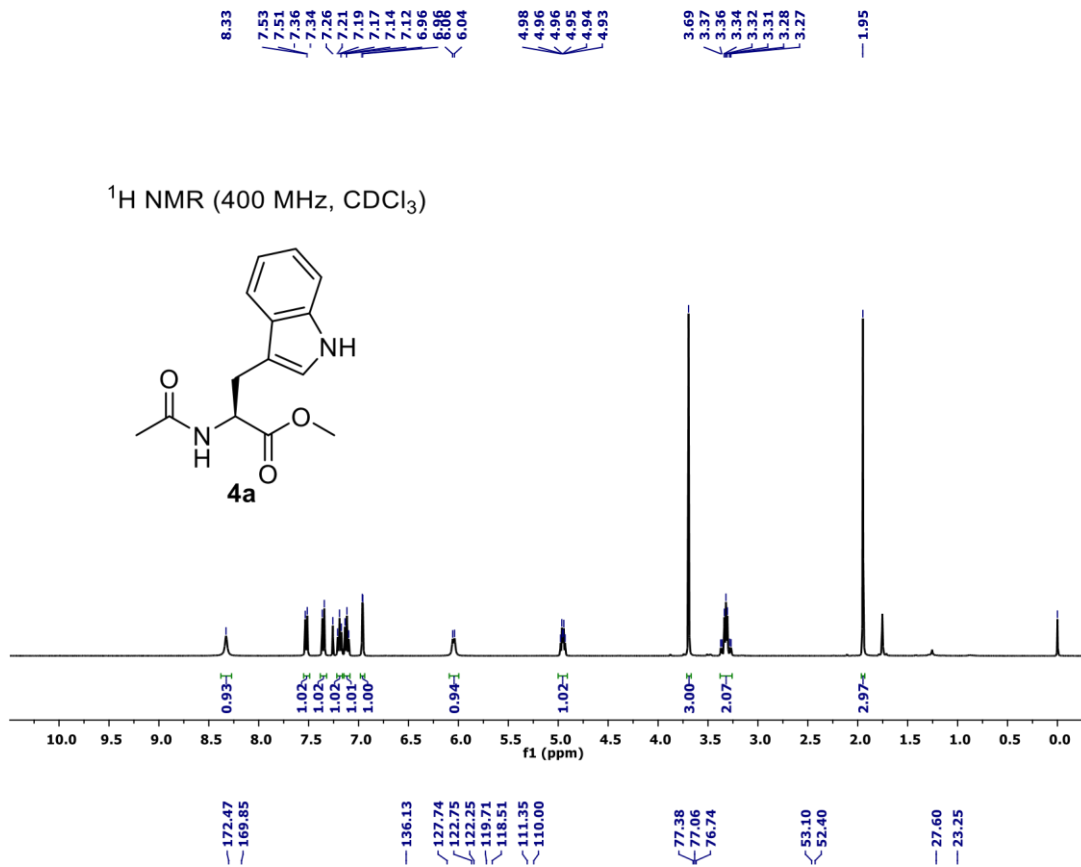

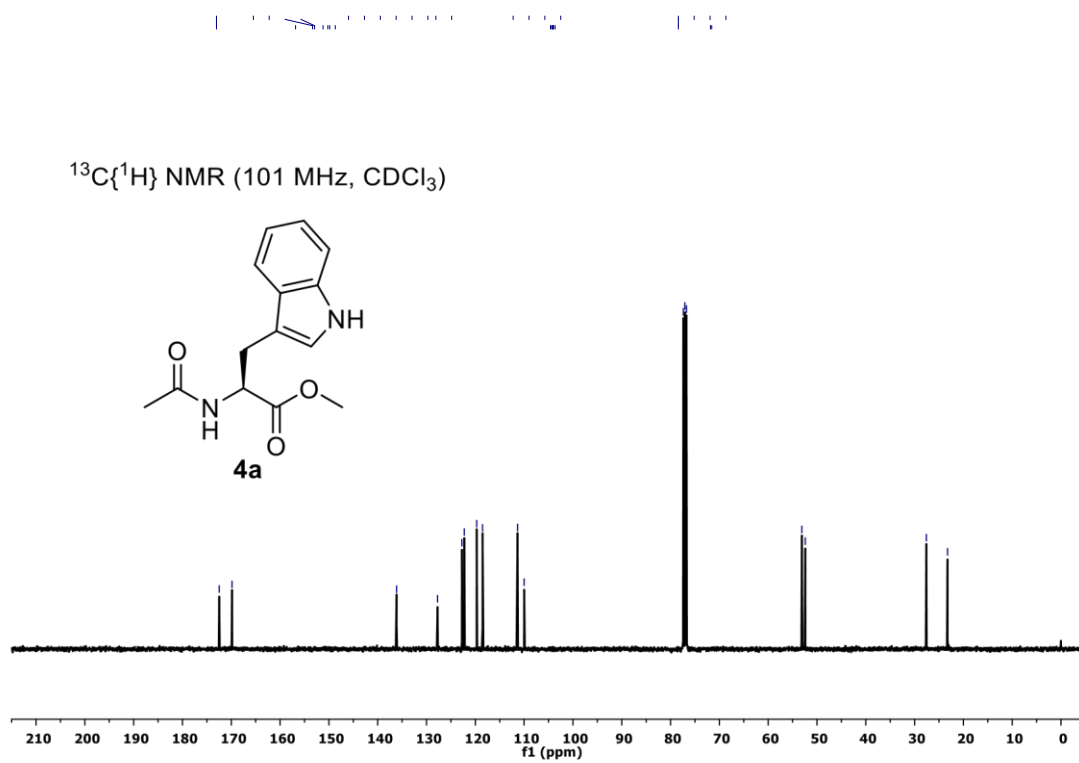

S25.

4a.

**Fig**  $^1\text{H}$ ,  $^{13}\text{C}\{^1\text{H}\}$  NMR spectra of tryptophan derivative

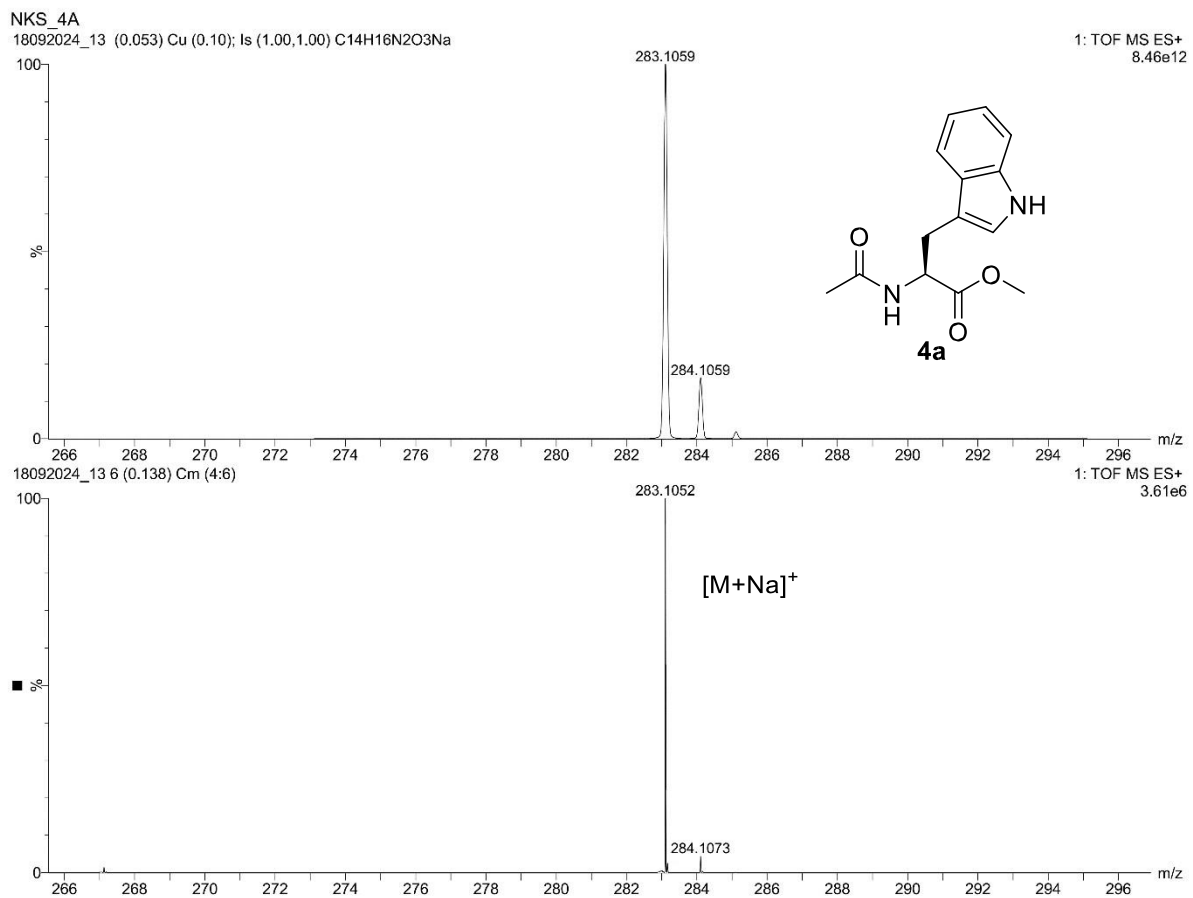

**Fig S26.** ESI-HRMS spectra of tryptophan derivative **4a**.

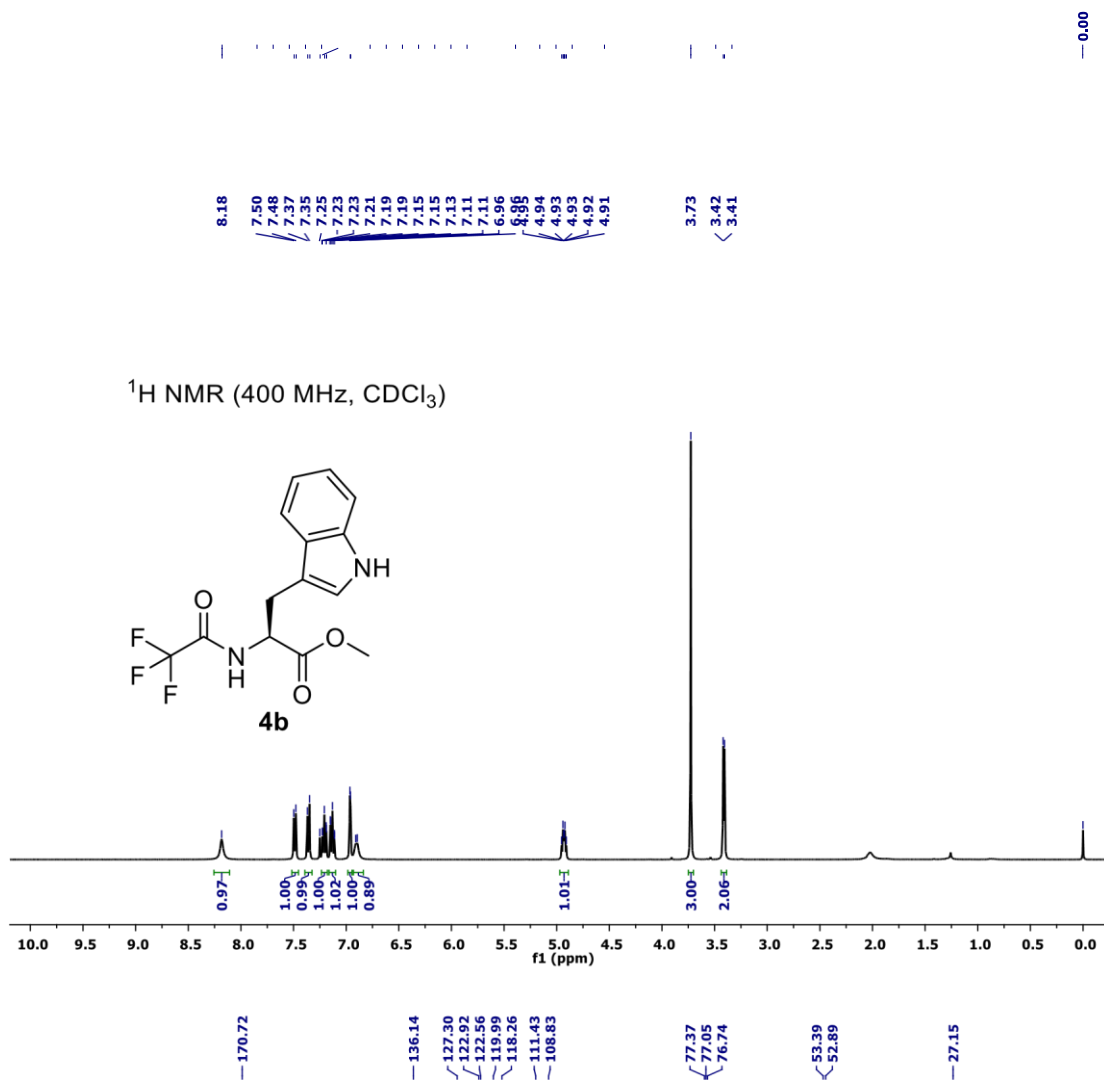

$^{13}\text{C}\{^1\text{H}\}$  NMR (101 MHz,  $\text{CDCl}_3$ )

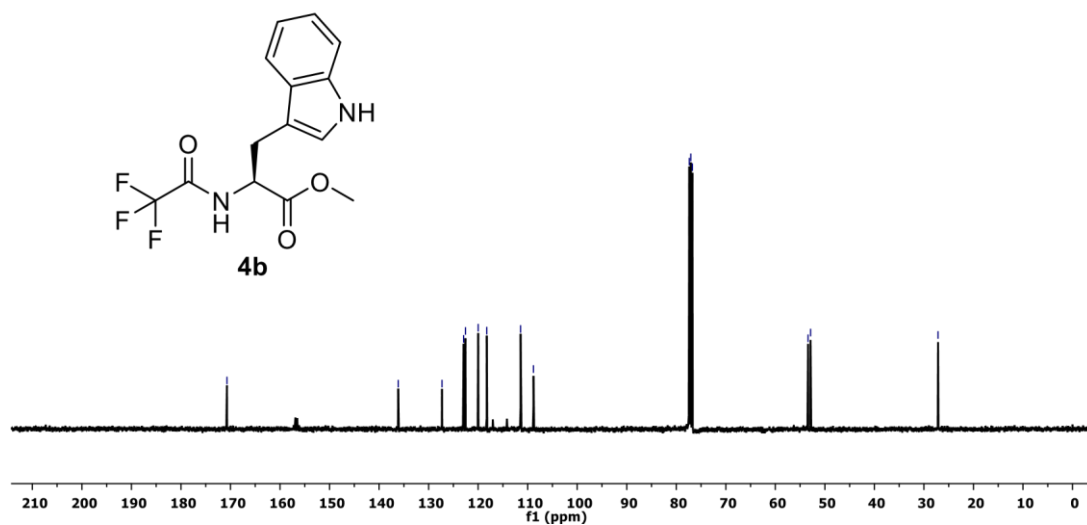

**Fig S27.**  $^1\text{H}$ ,  $^{13}\text{C}\{^1\text{H}\}$  NMR spectra of tryptophan derivative **4b**.

NKS\_CKJ\_1422

29-Jun-2024  
16:50:37

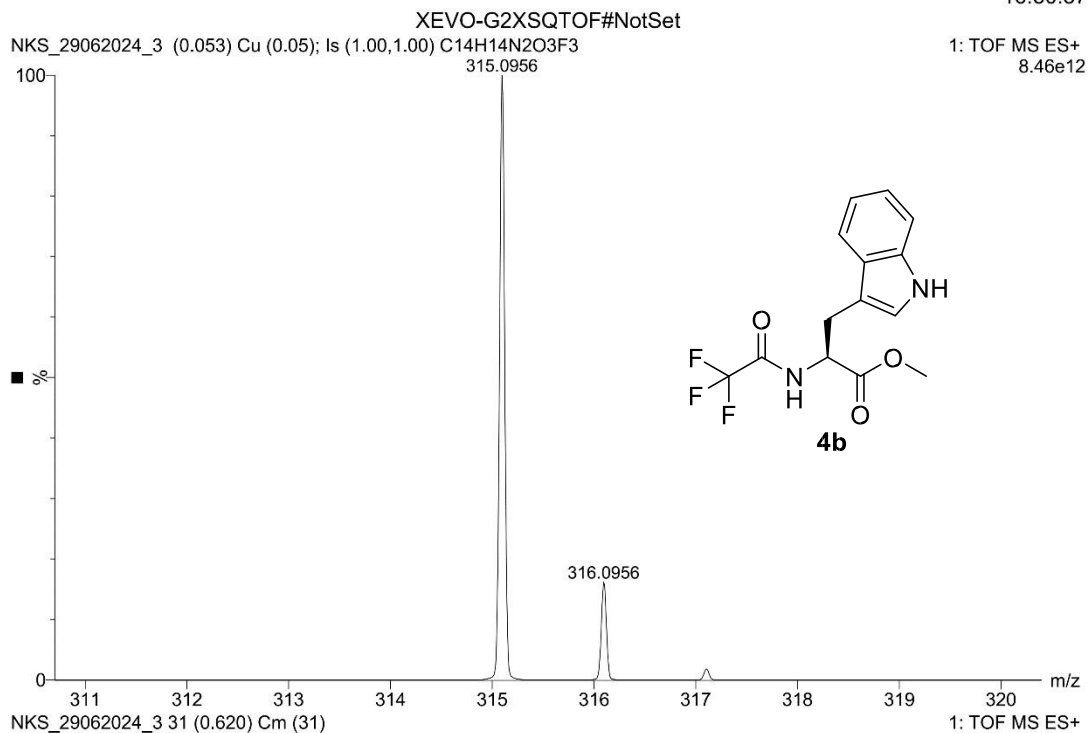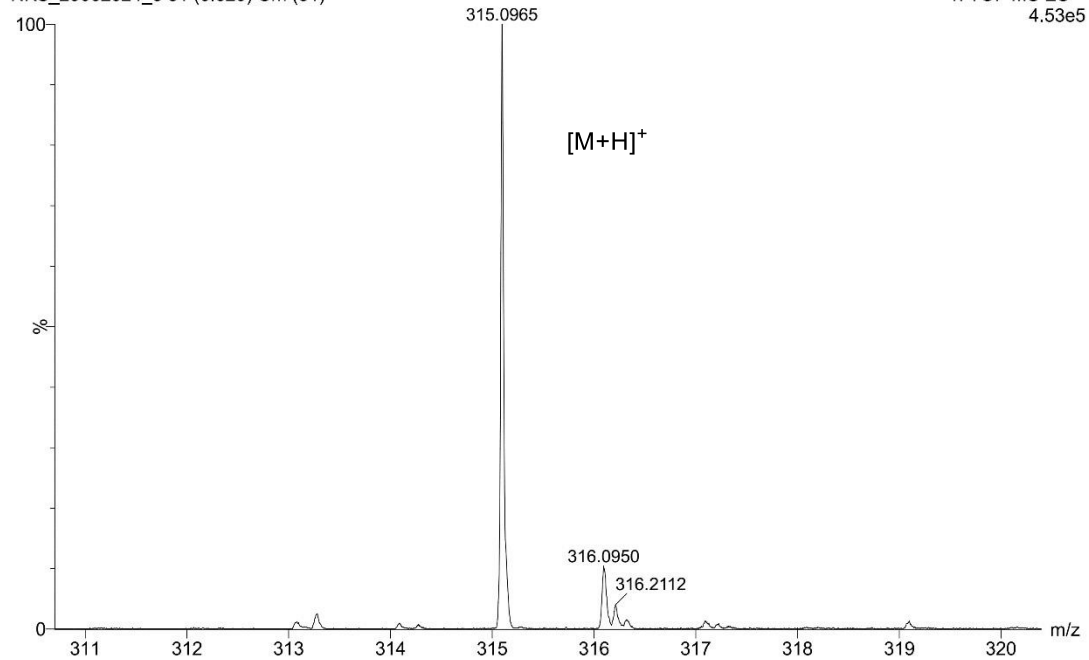

**Fig S28.** ESI-HRMS spectra of tryptophan derivative **4b**.



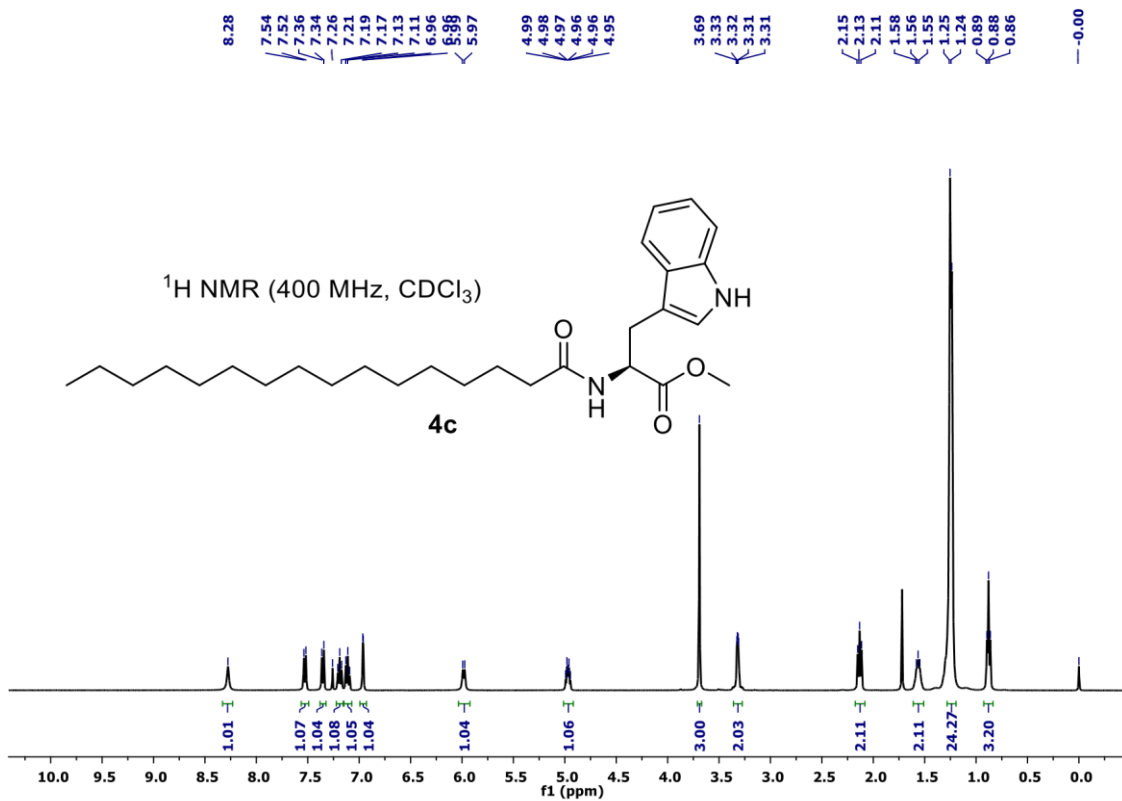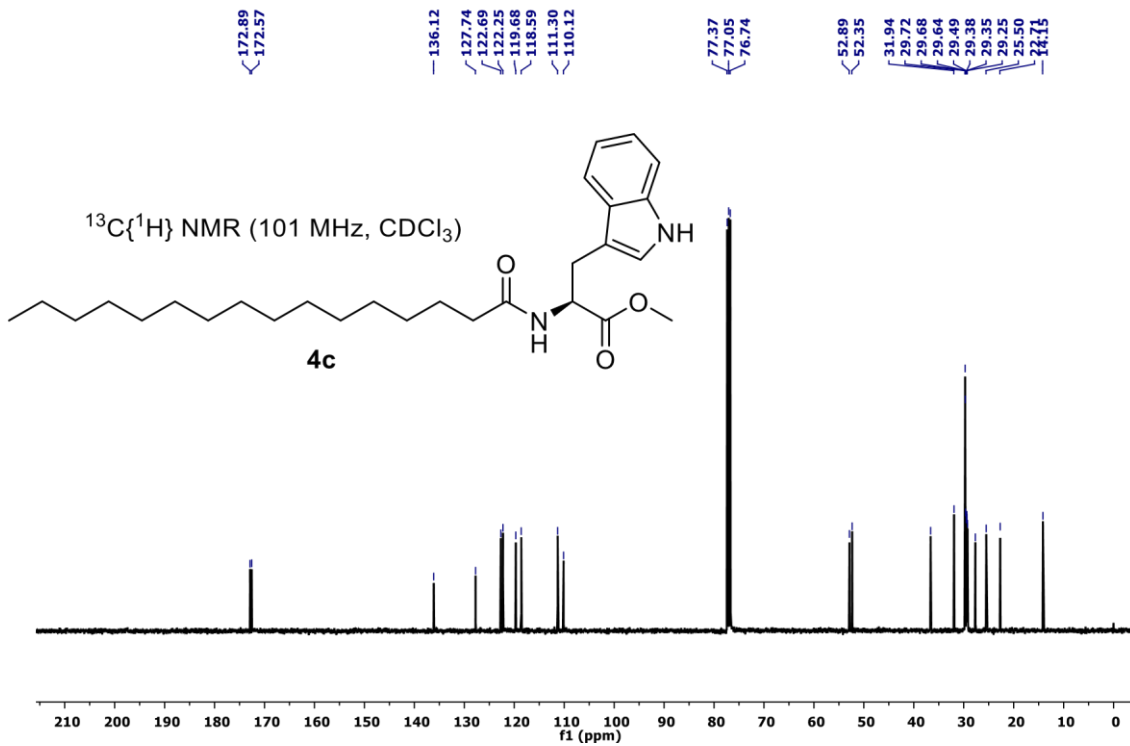

**Fig S29.**  $^1\text{H}$ ,  $^{13}\text{C}$   $\{^1\text{H}\}$  NMR spectra of tryptophan derivative **4c**.

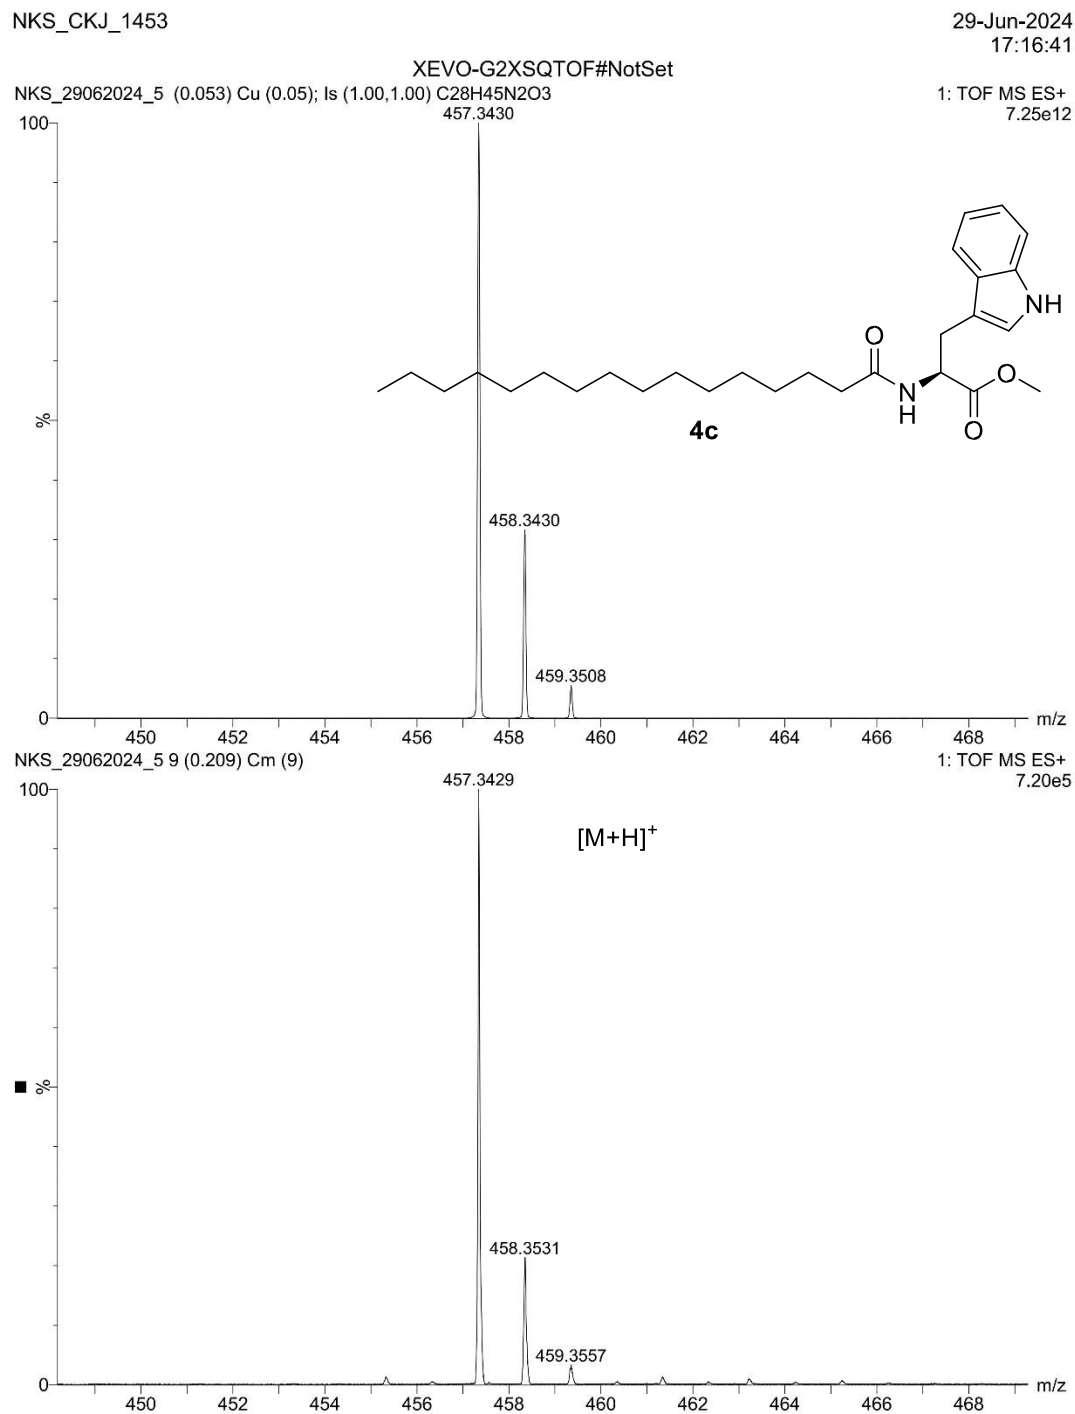

**Fig S30.** ESI-HRMS spectra of tryptophan derivative **4c**.



— 8.15  
 7.59  
 7.58  
 7.58  
 7.57  
 7.19  
 7.10  
 7.08  
 7.06  
 7.04  
 7.02  
 7.00  
 6.94  
 6.94  
 5.28  
 5.26  
 5.25  
 5.24  
 4.27  
 4.26  
 4.26  
 4.24  
 4.24  
 3.73  
 3.73  
 3.72

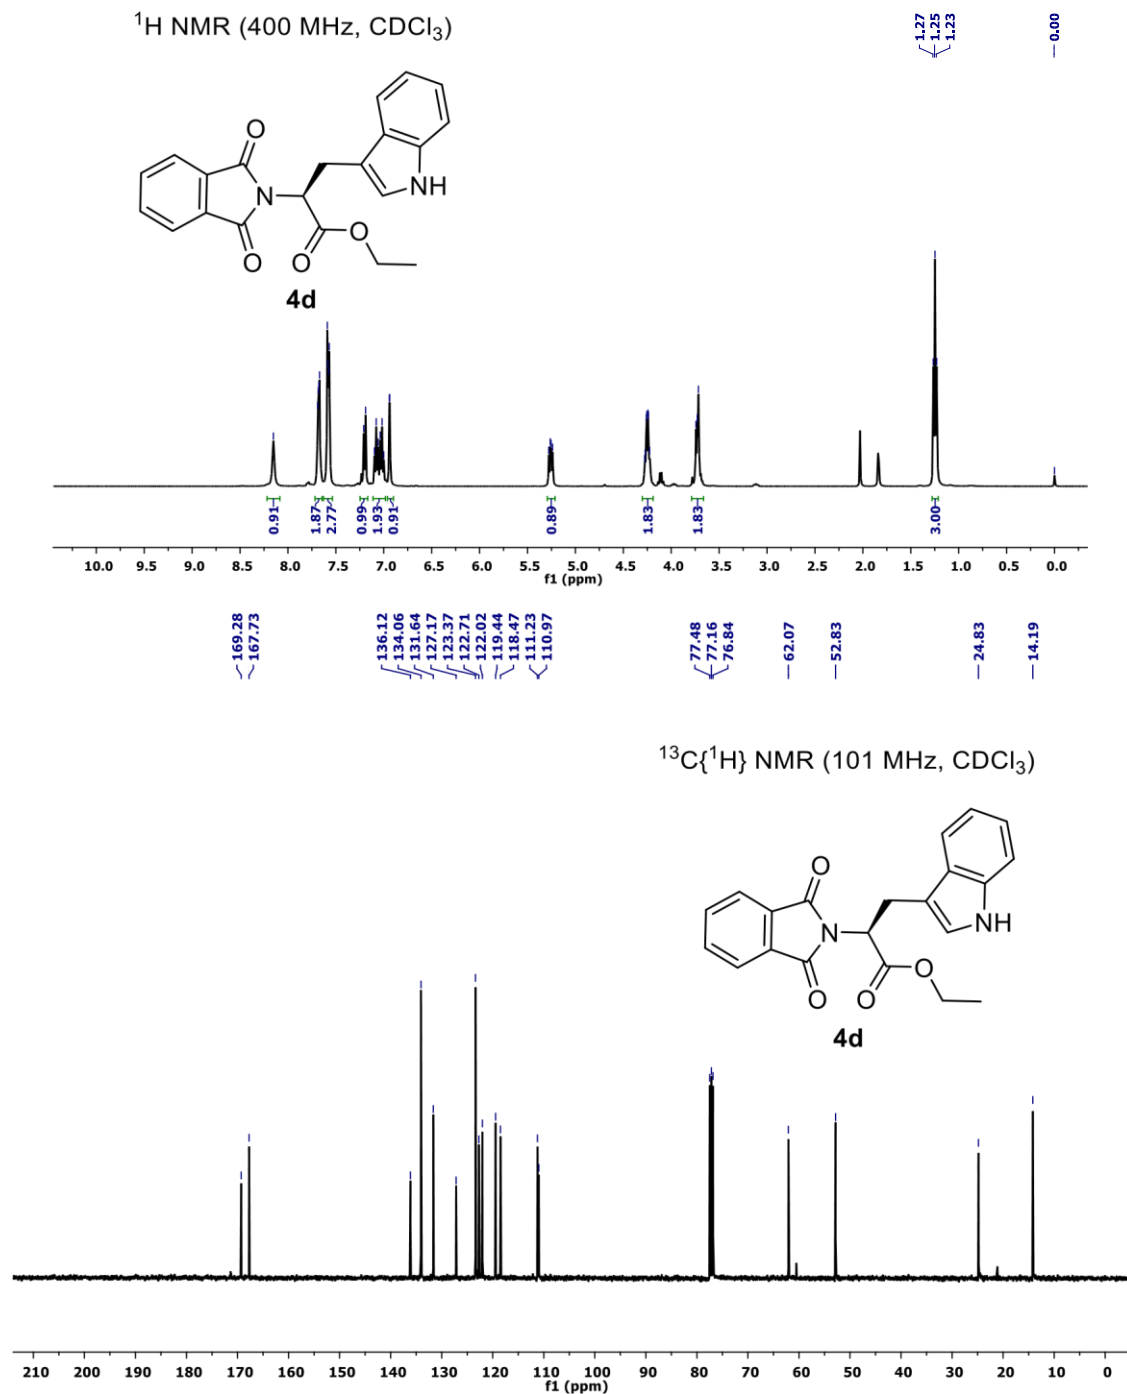

**Fig S31.**  $^1\text{H}$ ,  $^{13}\text{C}\{^1\text{H}\}$  NMR spectra of tryptophan derivative **4d**.

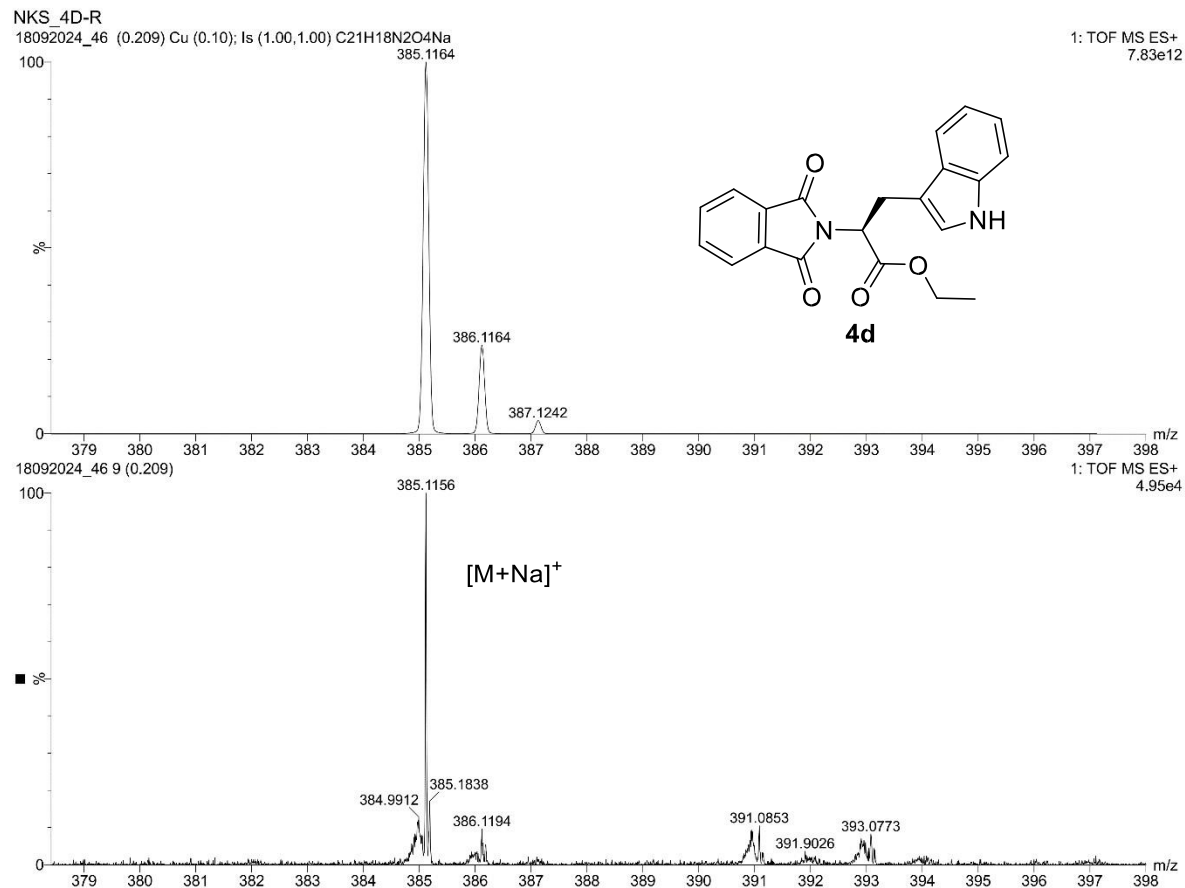

Fig S32. ESI-HRMS spectra of tryptophan derivative **4d**.

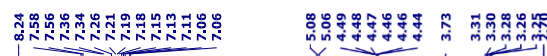

Fig  $^1\text{H}$ ,  $^{13}\text{C}$  NMR spectra of tryptophan derivative

$^1\text{H}$  NMR (400 MHz,  $\text{CDCl}_3$ )

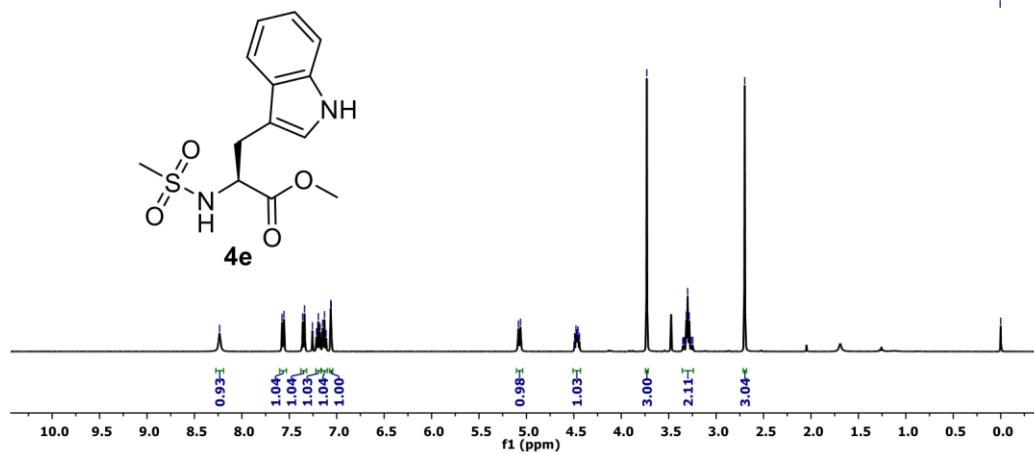

$^{13}\text{C}\{^1\text{H}\}$  NMR (101 MHz,  $\text{CDCl}_3$ )

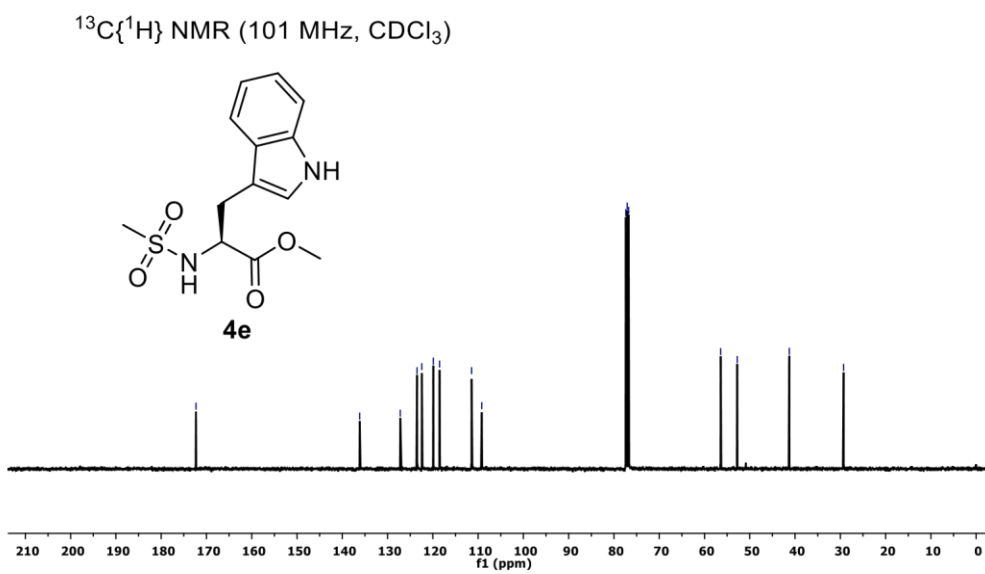

S33.  $\text{C}\{^1$

4e.

NKS\_CKJ\_1399

05-May-2024  
22:43:01

XEVO-G2XSQTOF#NotSet

NKS\_05052024\_7 (0.053) Cu (0.05); Is (1.00,1.00) C13H16N2O4SNa

1: TOF MS ES+  
8.10e12

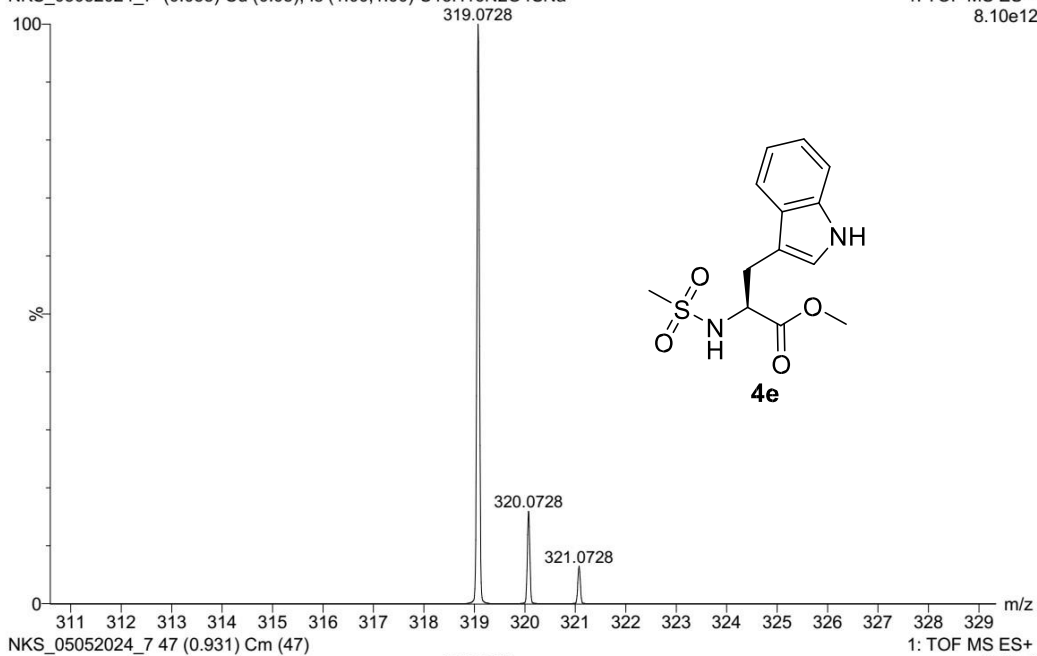

NKS\_05052024\_7 47 (0.931) Cm (47)

1: TOF MS ES+  
3.94e6

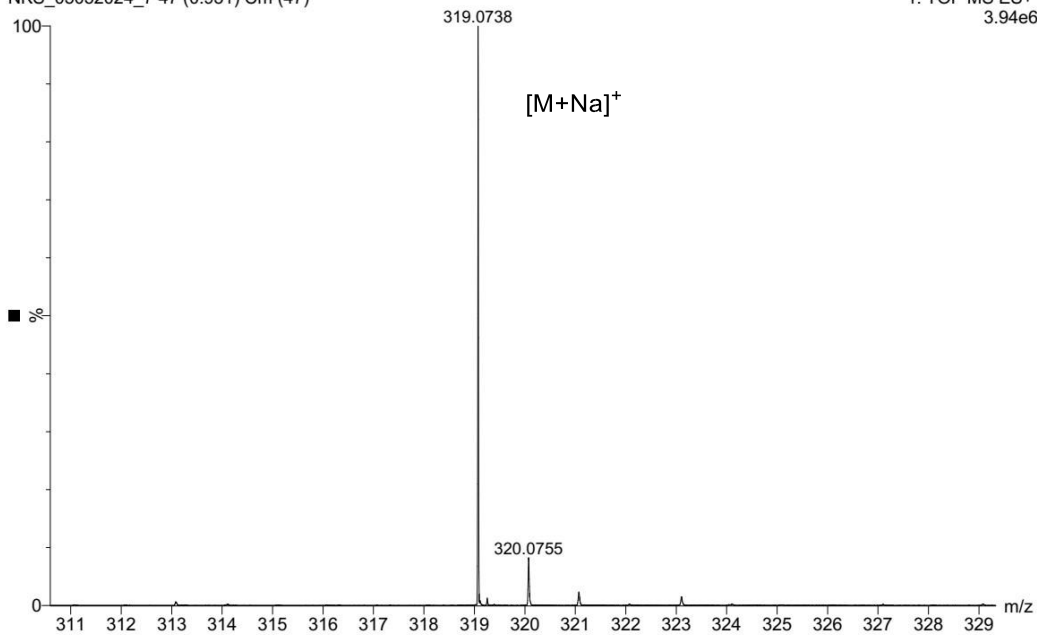

Fig



**Fig S34.** ESI-HRMS spectra of tryptophan derivative **4e**.

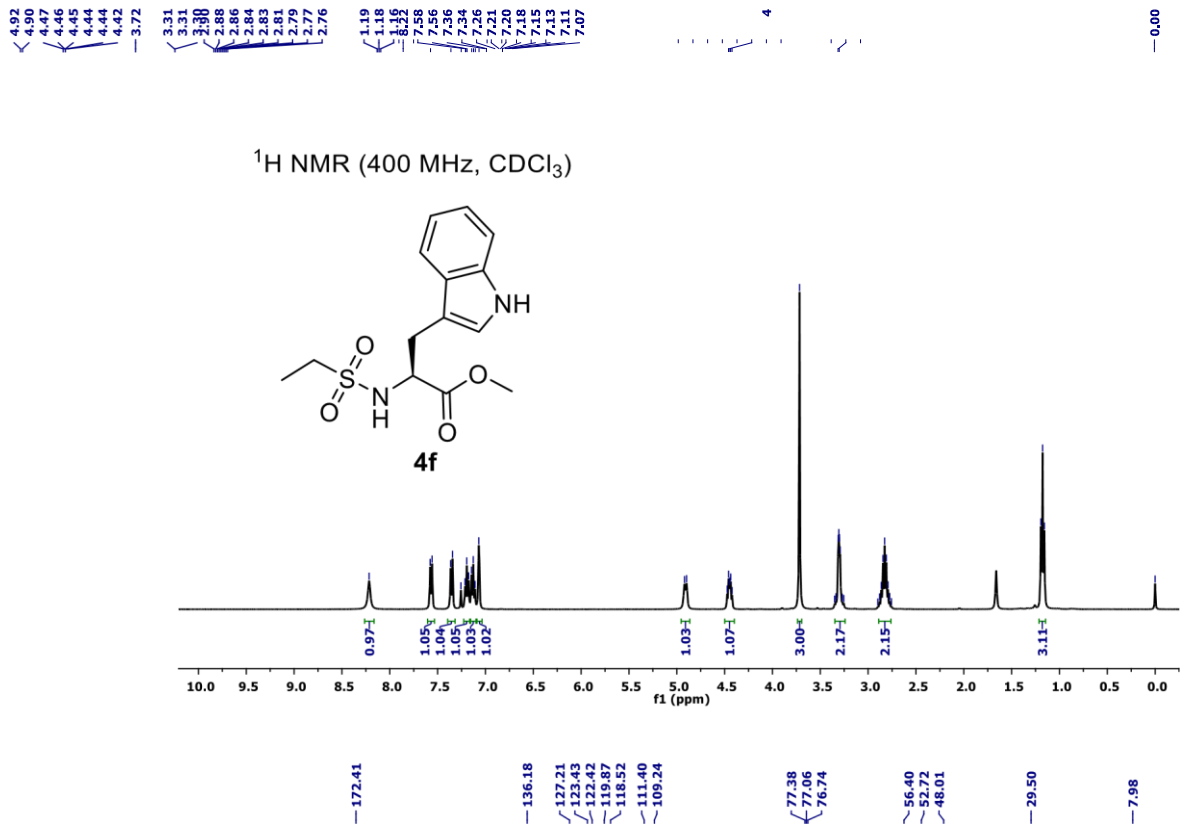

**Fig**  $^1\text{H}$ ,  $^{13}\text{C}$  NMR spectra of tryptophan derivative

$^{13}\text{C}\{^1\text{H}\}$  NMR (101 MHz,  $\text{CDCl}_3$ )

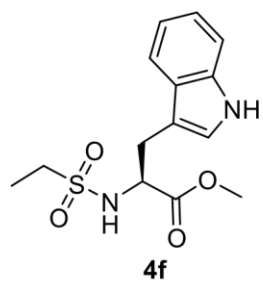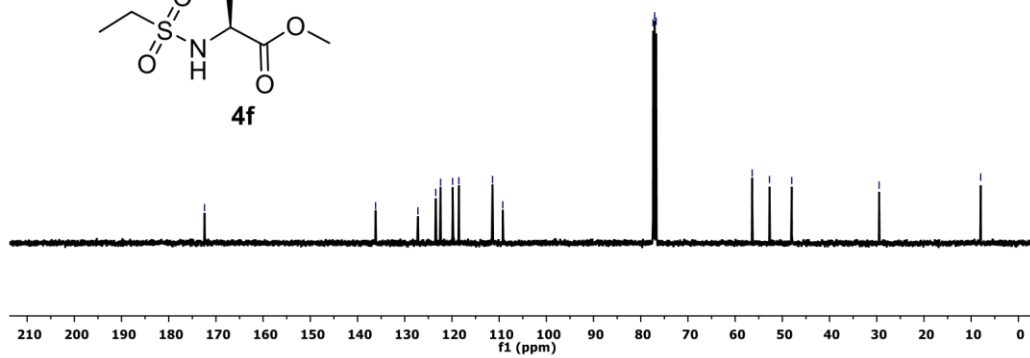

S35.  $\text{C}\{^1$

4f.

NKS\_CKJ\_1410

05-May-2024  
22:50:45

XEVO-G2XSQTOF#NotSet

NKS\_05052024\_8 (0.053) Cu (0.05); Is (1.00,1.00) C14H18N2O4SNa

1: TOF MS ES+  
8.02e12

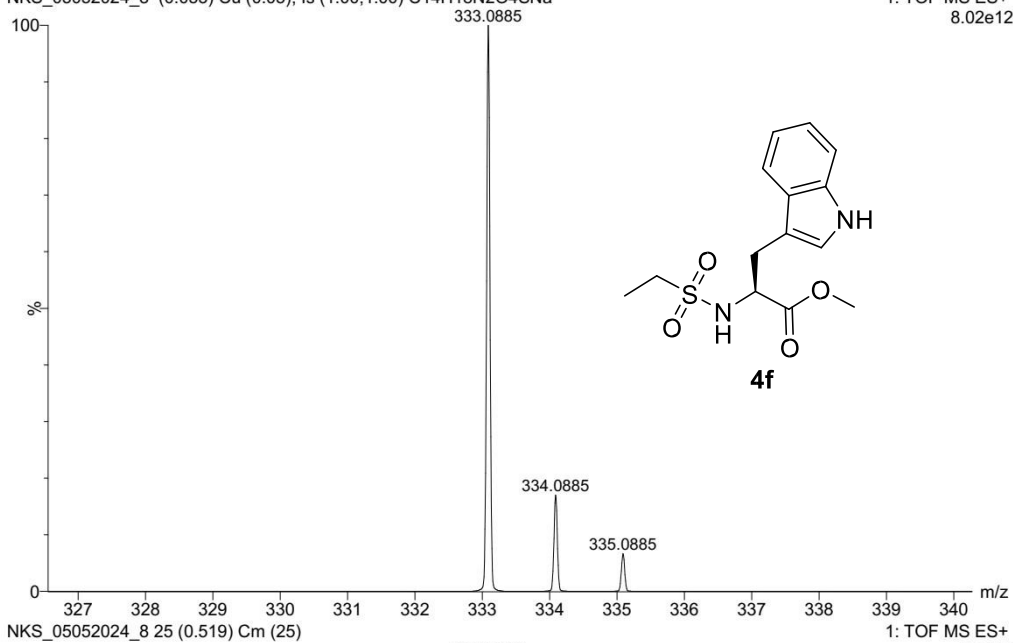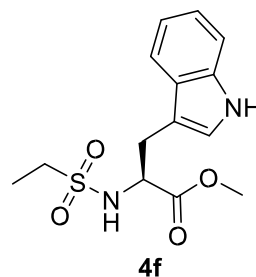

NKS\_05052024\_8 25 (0.519) Cm (25)

1: TOF MS ES+  
4.69e6

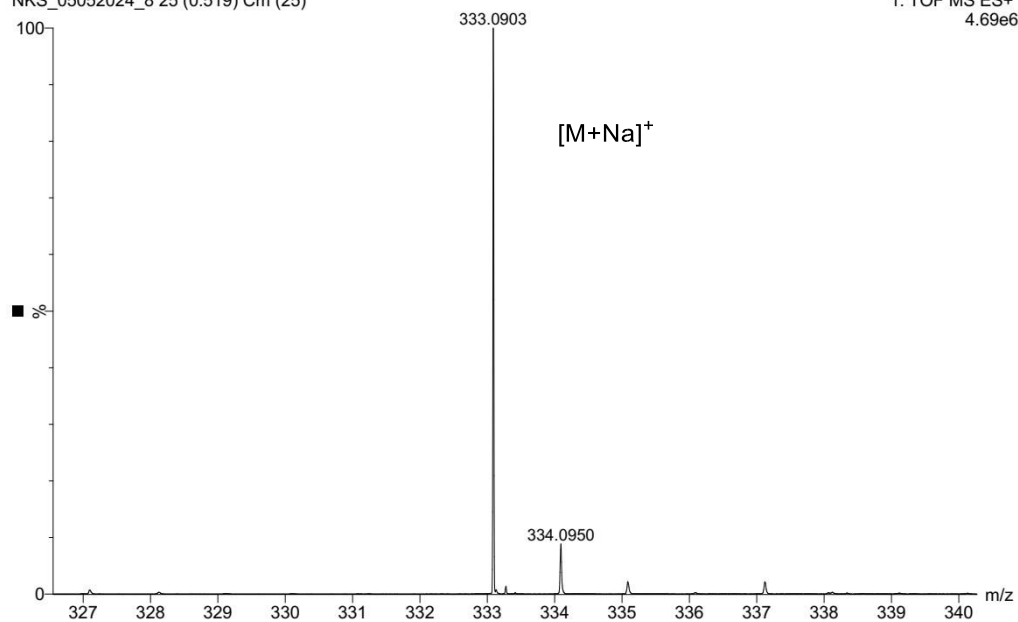

Fig

Fig S36. ESI-HRMS spectra of tryptophan derivative **4f**.

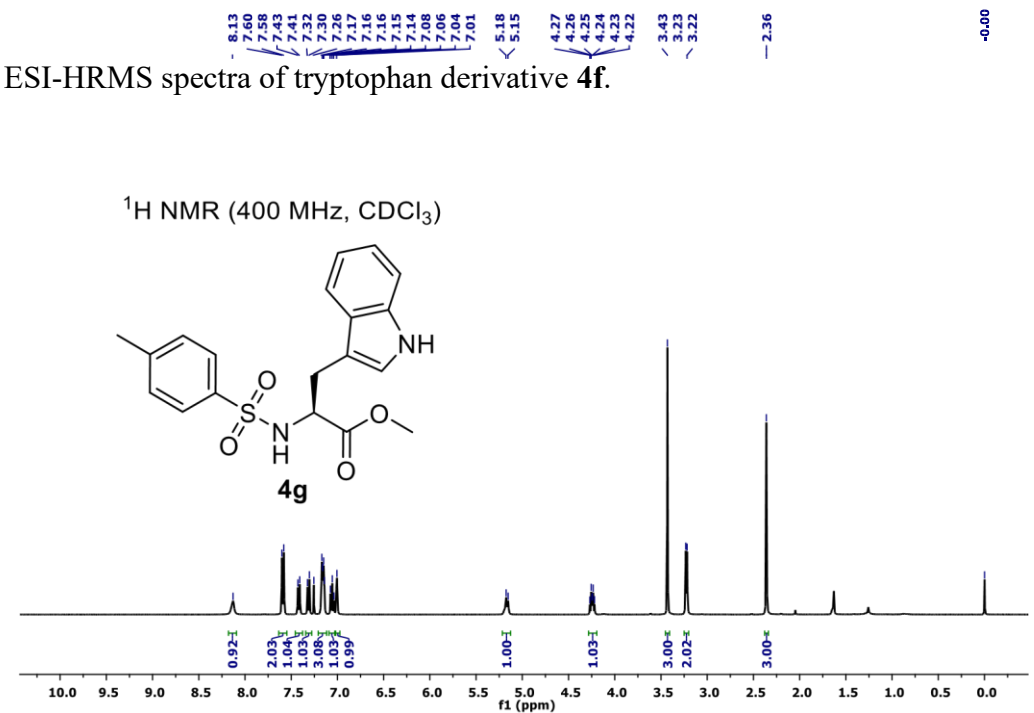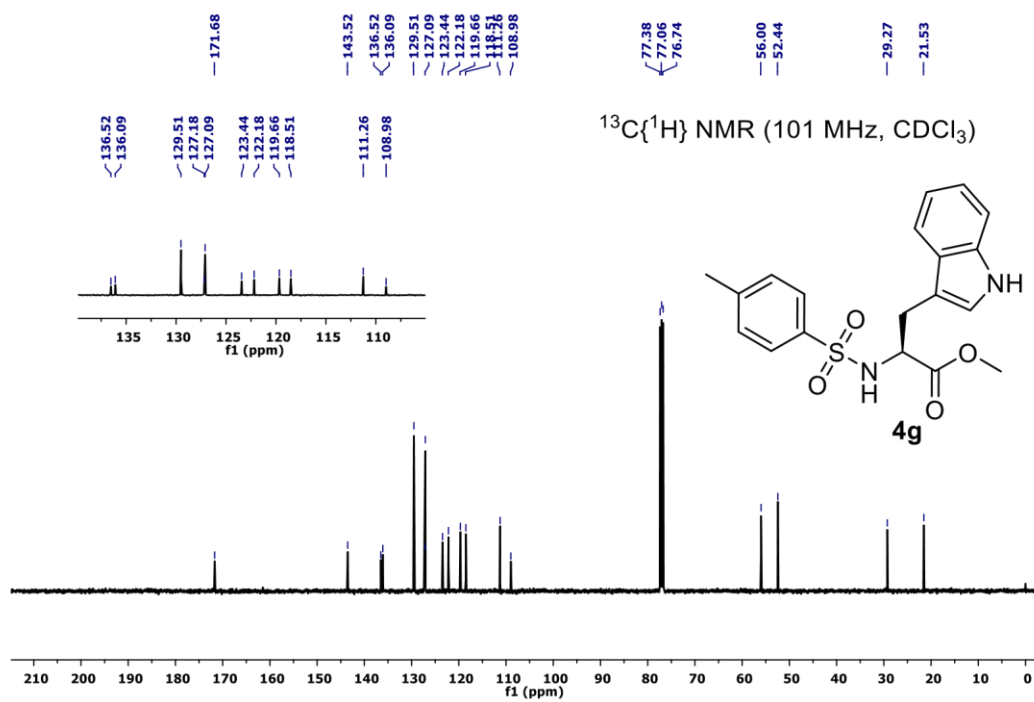

S37. C {<sup>1</sup>

**4g**.

NKS\_CKJ\_1393

05-May-2024  
23:13:44

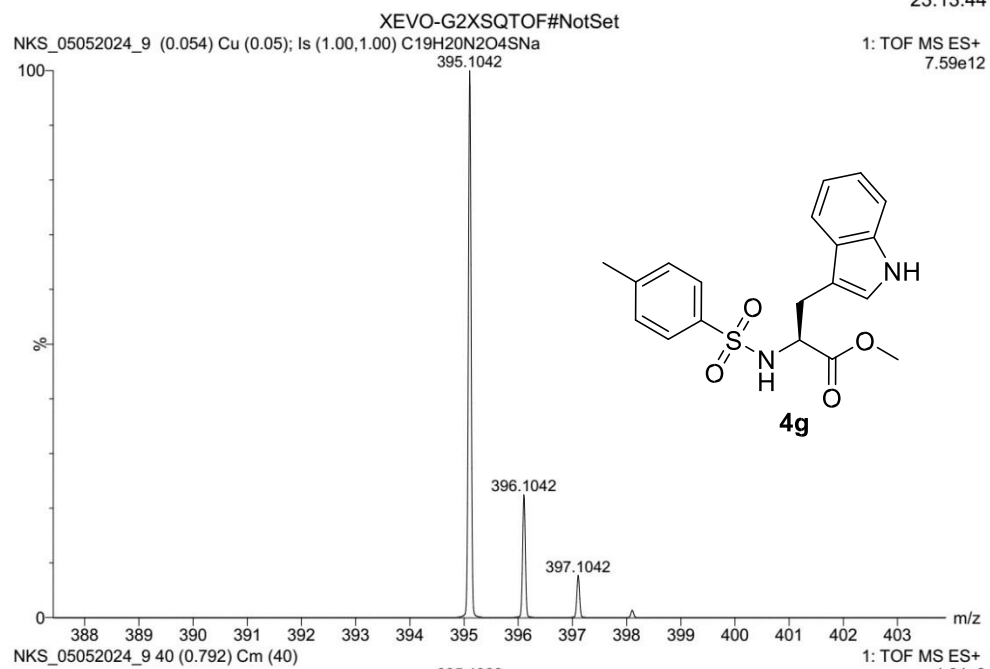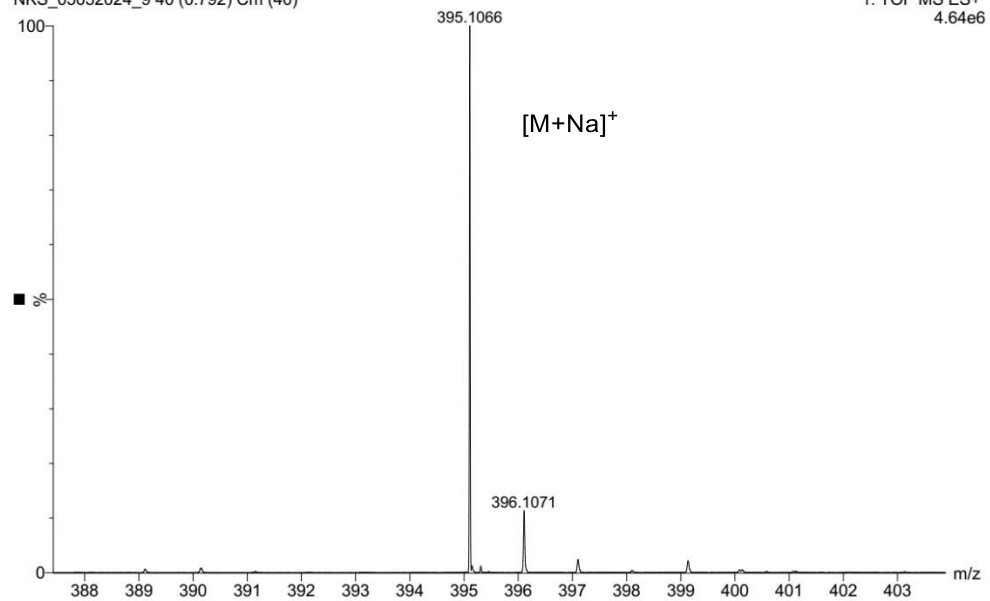

Fig

**Fig S38.** ESI-HRMS spectra of tryptophan derivative **4g**.

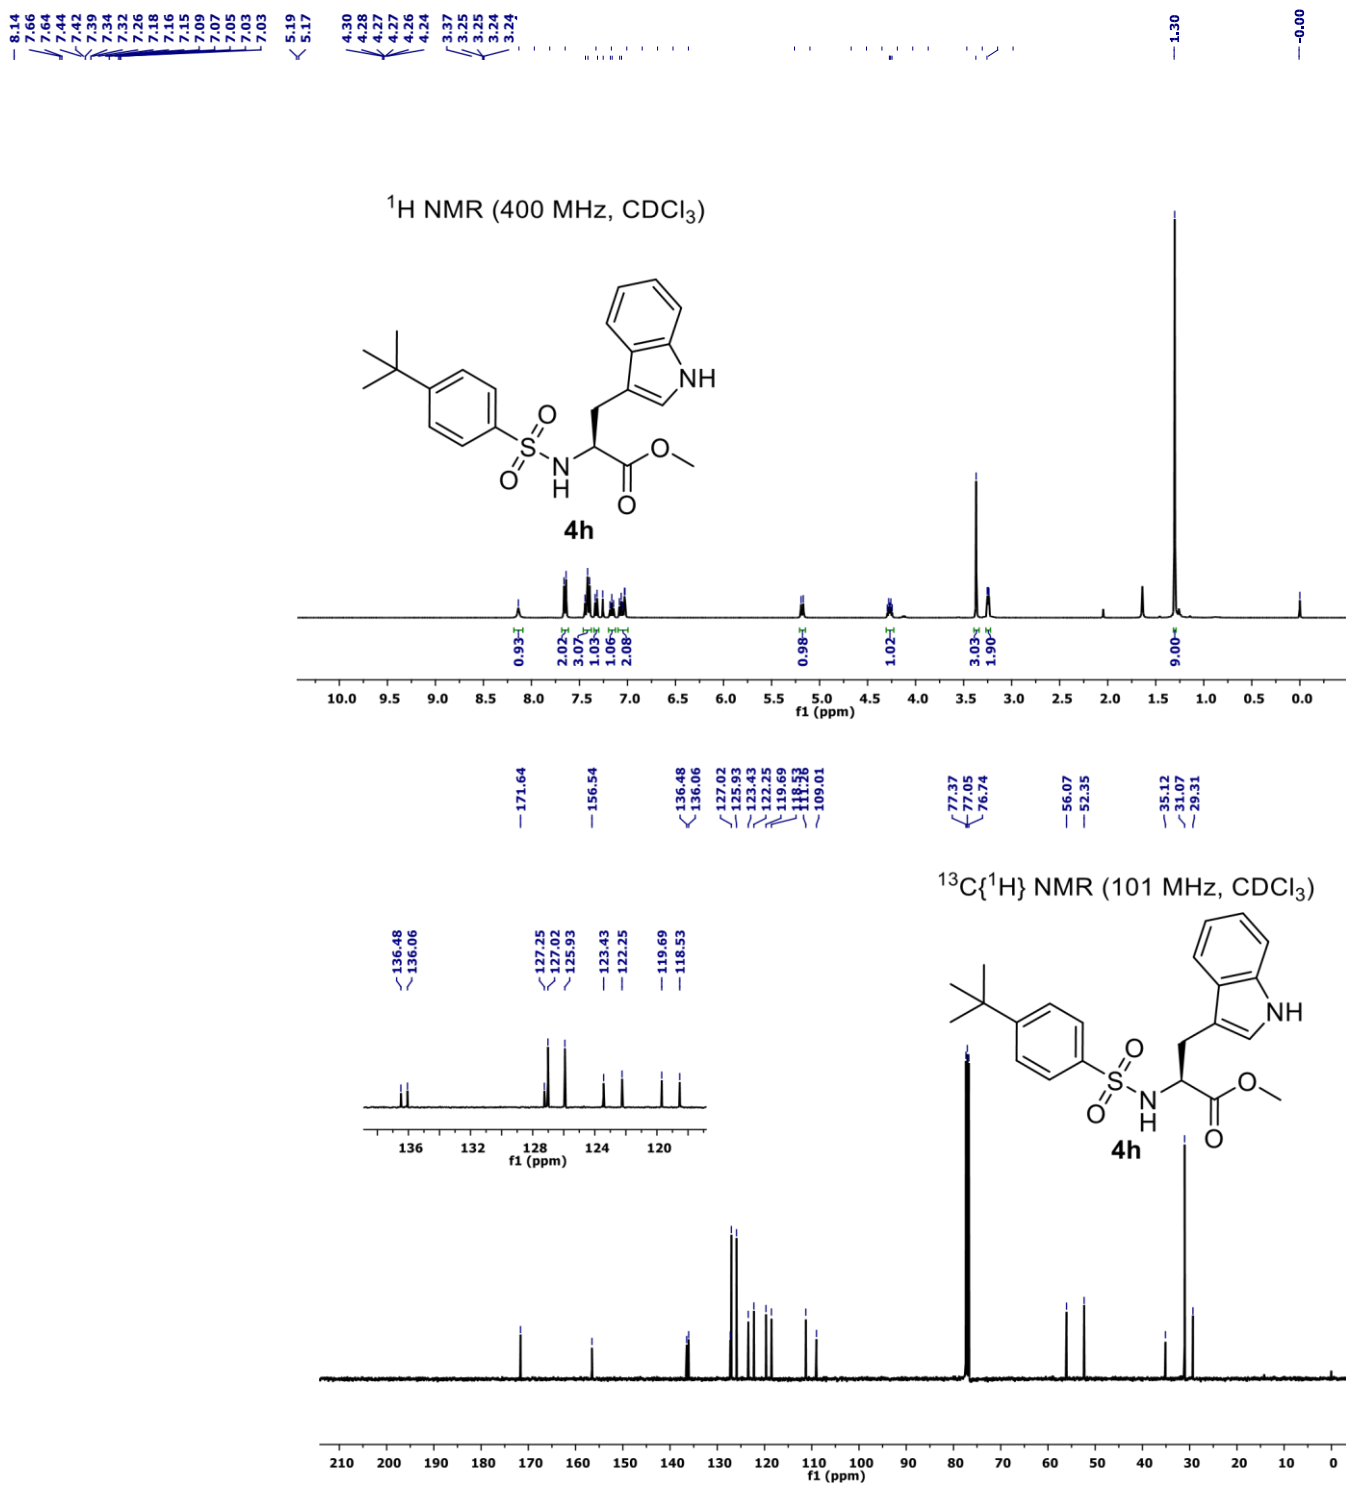

**Fig S39.** <sup>1</sup>H, <sup>13</sup>C {<sup>1</sup>H} NMR spectra of tryptophan derivative **4h**.



NKS\_CKJ\_1441

14-May-2024  
20:46:53

XEVO-G2XSQTOF#NotSet

NKS\_14052024\_1 (0.053) Cu (0.05); Is (1.00,1.00) C22H26N2O4SNa

1: TOF MS ES+  
7.35e12

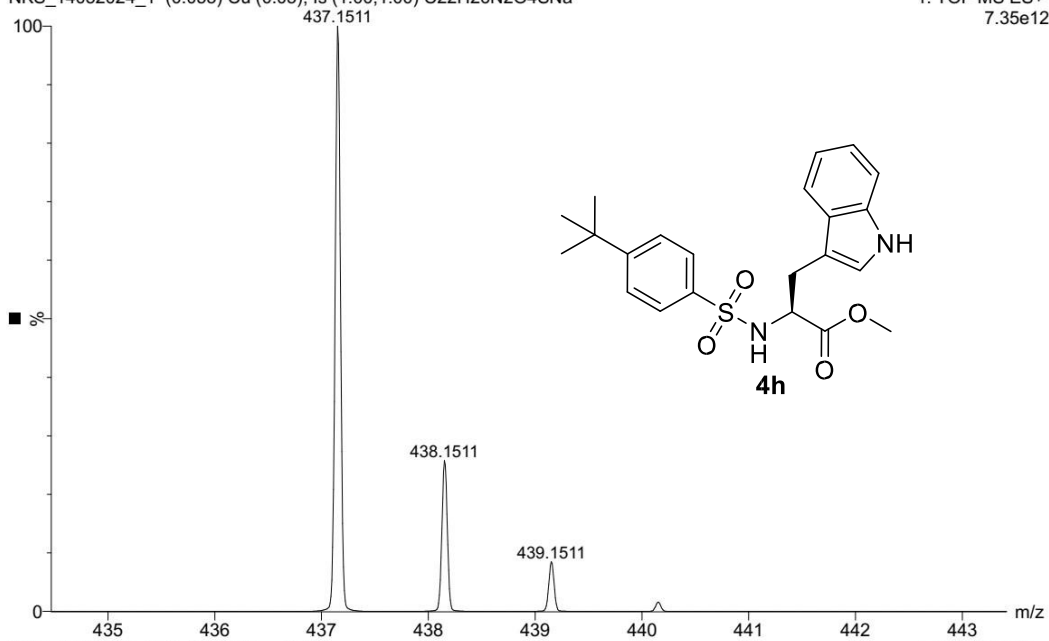

NKS\_14052024\_1 48 (0.947) Cm (48)

1: TOF MS ES+  
2.25e5

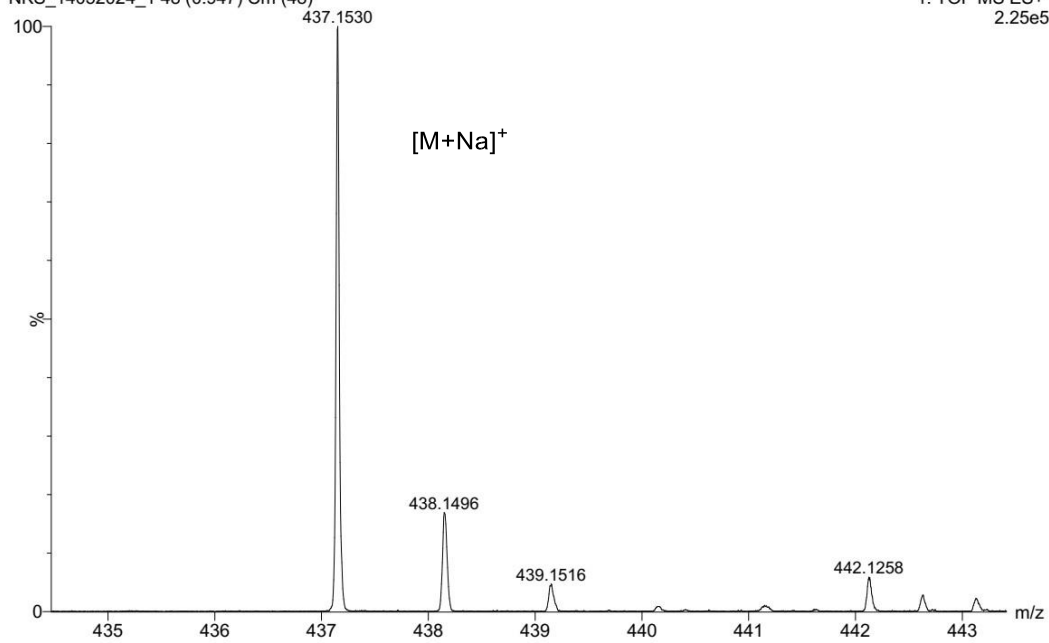

**Fig S40.** ESI-HRMS spectra of tryptophan derivative **4h**.

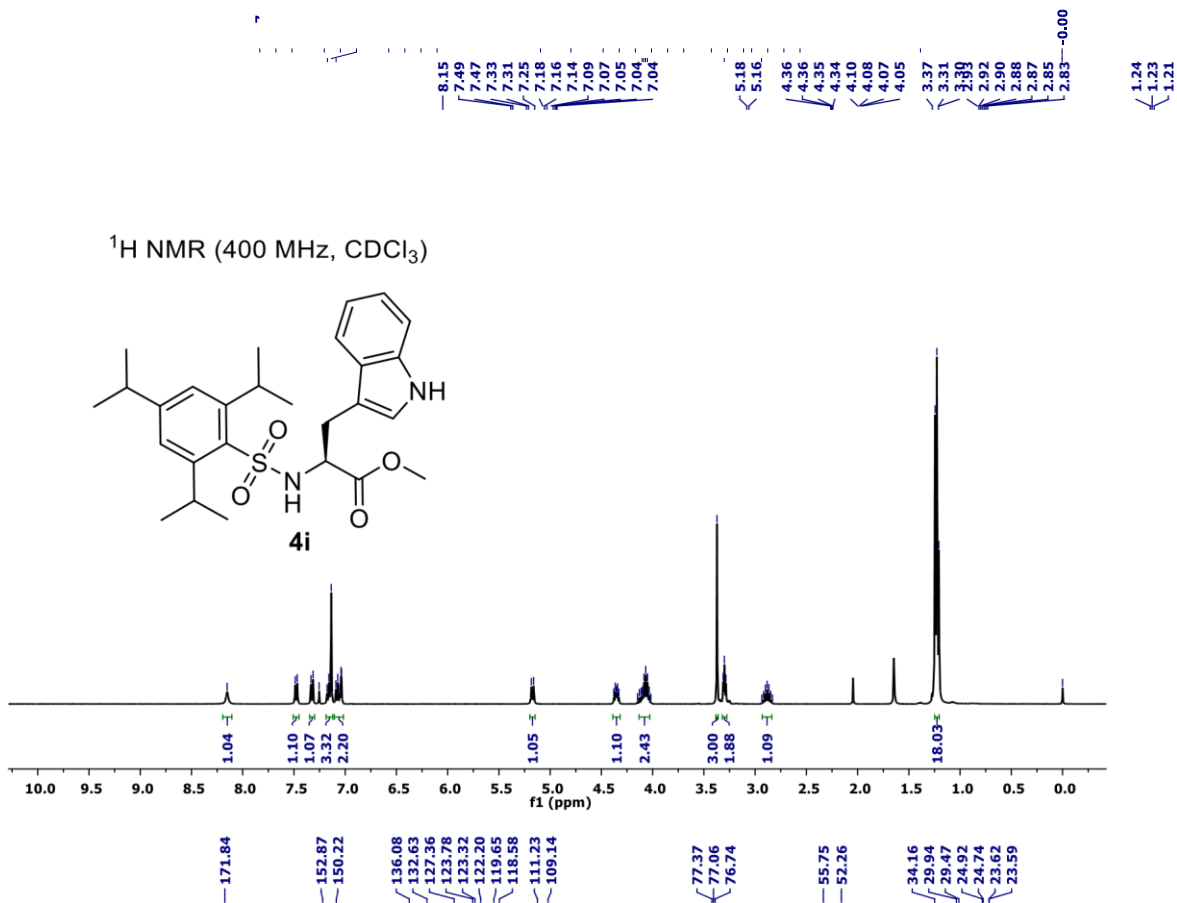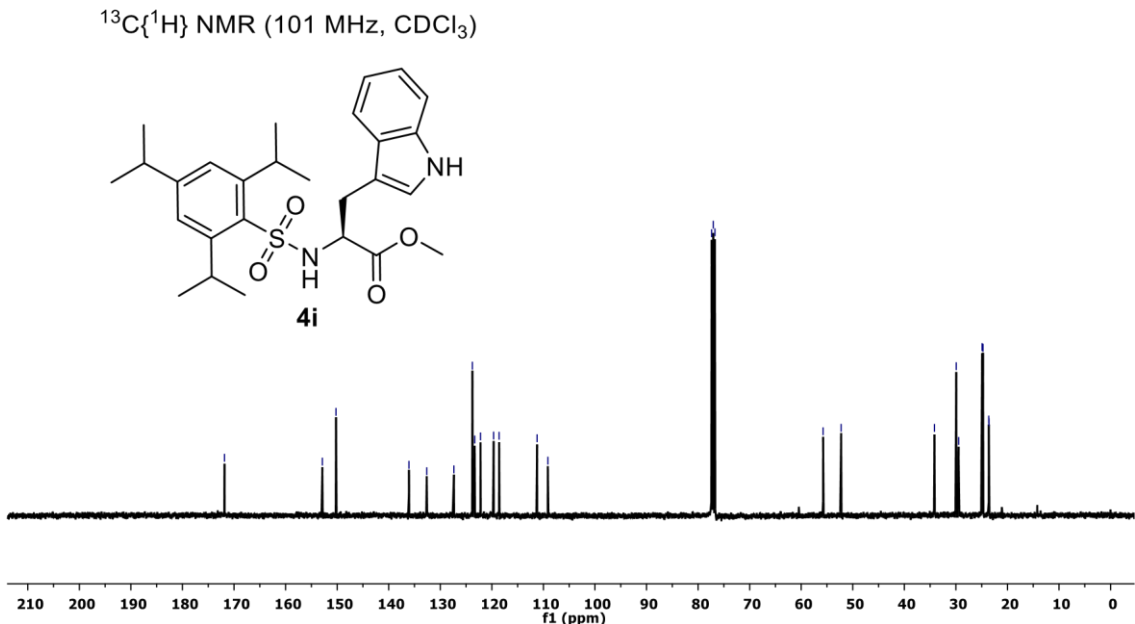

**Fig S41.**  $^1\text{H}$ ,  $^{13}\text{C}$   $\{^1\text{H}\}$  NMR spectra of tryptophan derivative **4i**.

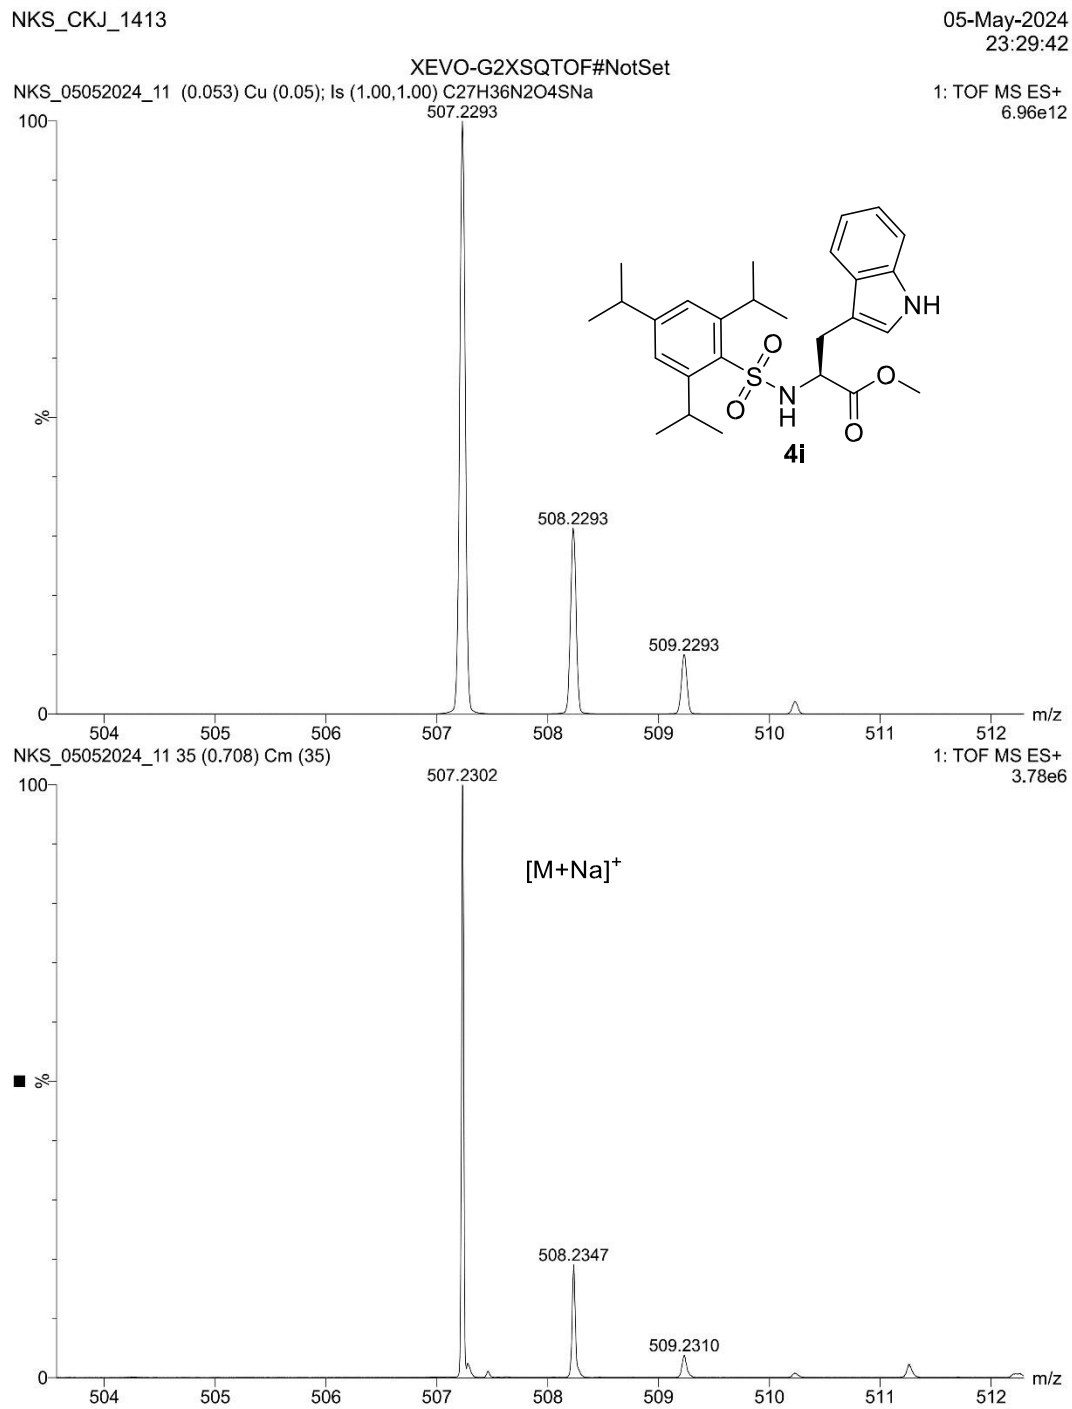

**Fig S42.** ESI-HRMS spectra of tryptophan derivative **4i**.

- 10.7+

8.85  
8.83  
7.95  
7.93  
7.55  
7.53  
7.72  
7.72  
7.12  
7.10  
7.05  
7.04  
6.94  
6.93  
6.92  
6.90  
6.88  
6.88  
4.05  
4.04  
4.03  
4.02  
4.02  
4.00  
3.57  
3.38  
3.38  
3.38  
3.37  
3.37  
3.11  
3.09  
3.07  
3.06  
2.90  
2.86  
2.86  
2.84  
2.51  
2.50  
-0.00

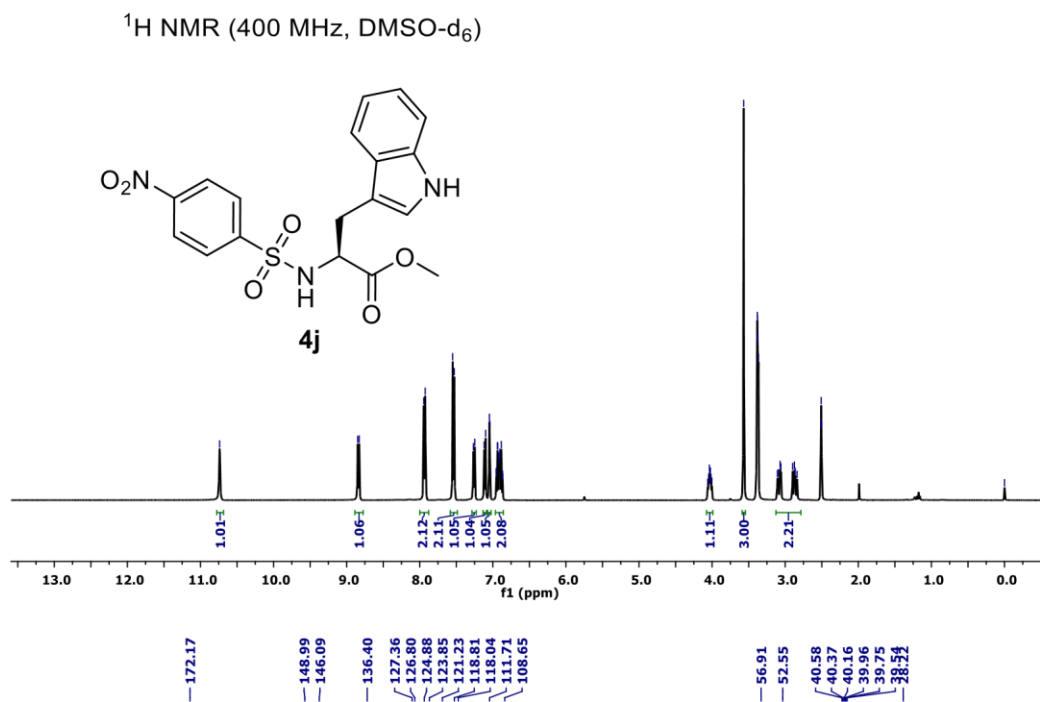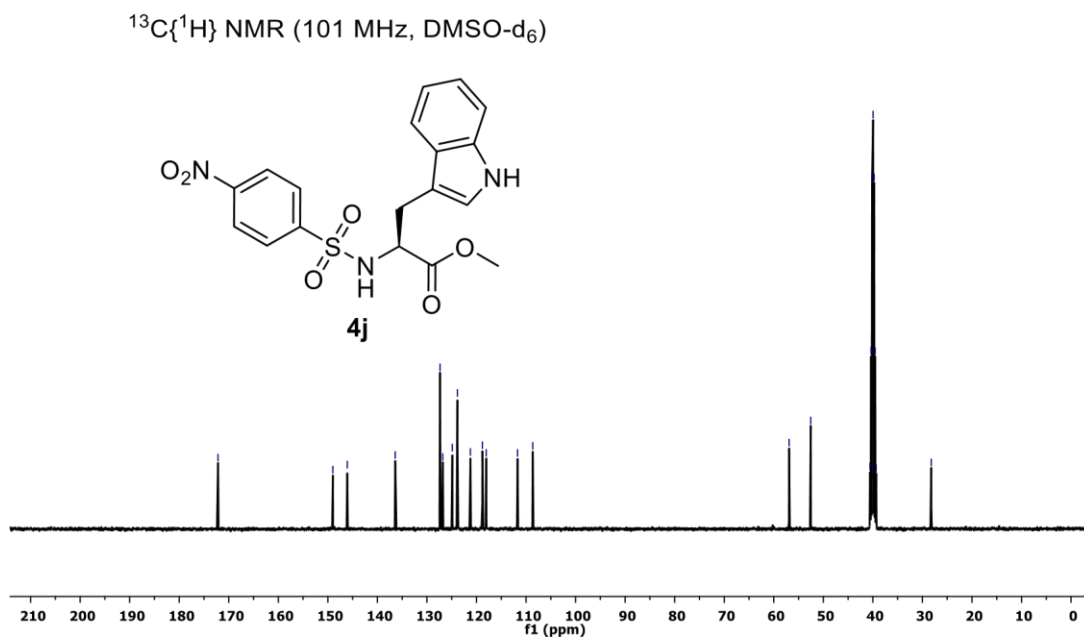

**Fig S43.**  $^1\text{H}$ ,  $^{13}\text{C}\{^1\text{H}\}$  NMR spectra of tryptophan derivative **4j**.

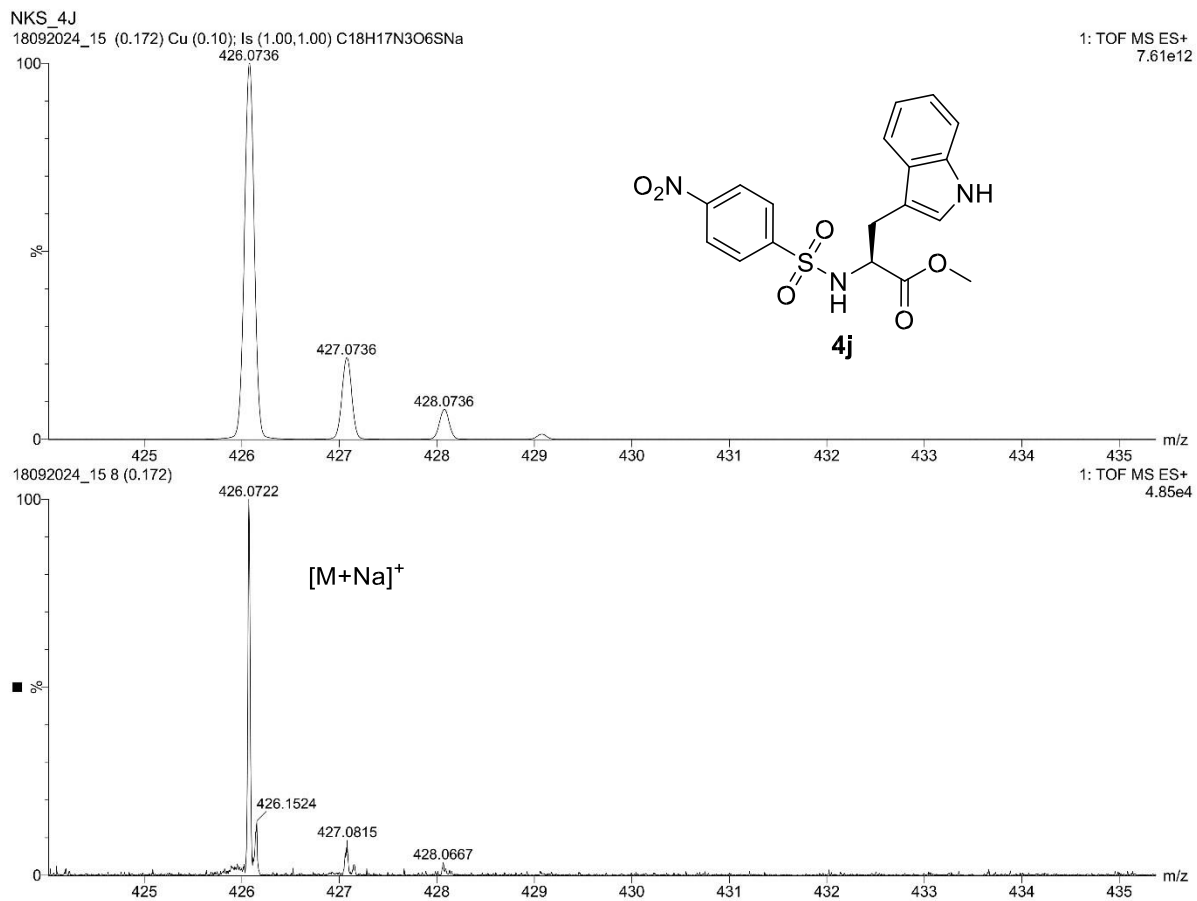

**Fig S44.** ESI-HRMS spectra of tryptophan derivative **4j**.

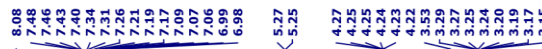

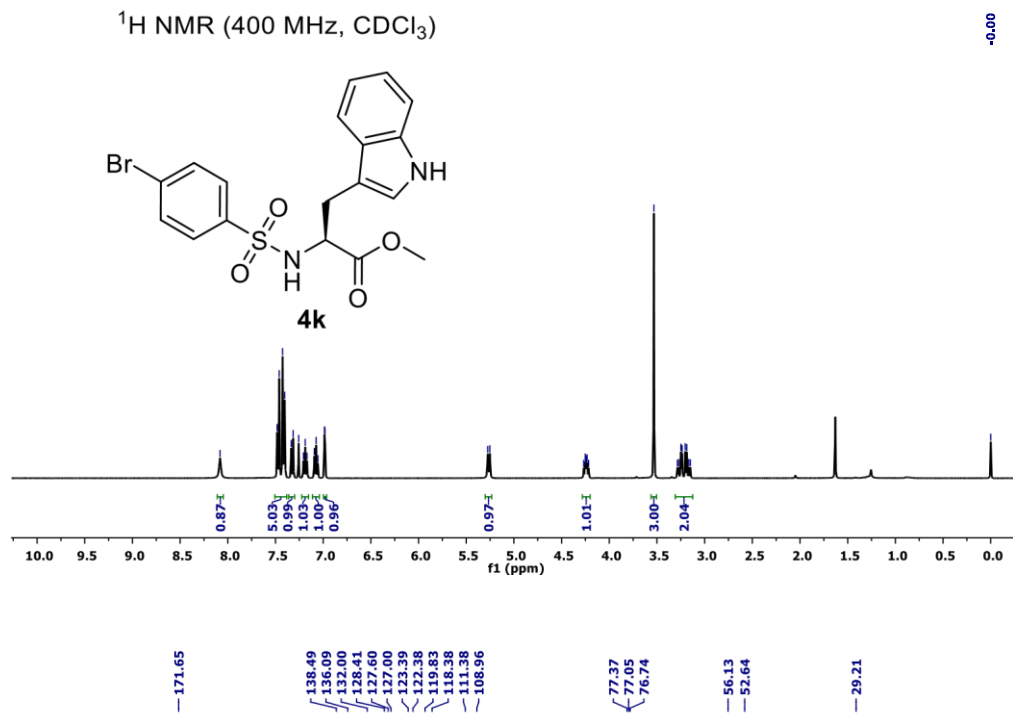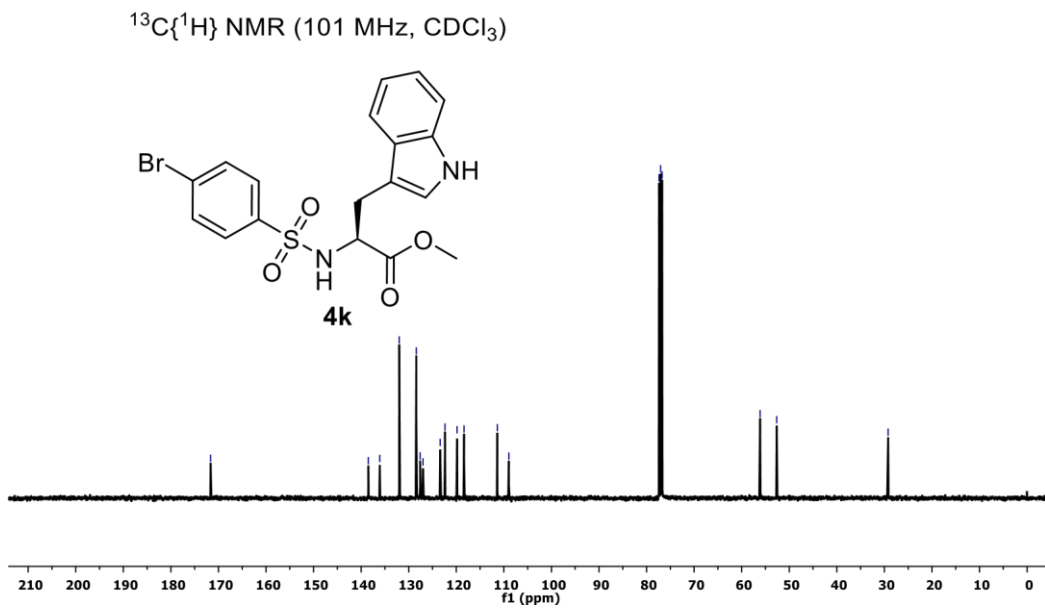

Fig S45. <sup>1</sup>H, <sup>13</sup>C {<sup>1</sup>H} NMR spectra of tryptophan derivative **4k**.

NKS\_CKJ\_1411

05-May-2024  
23:20:25

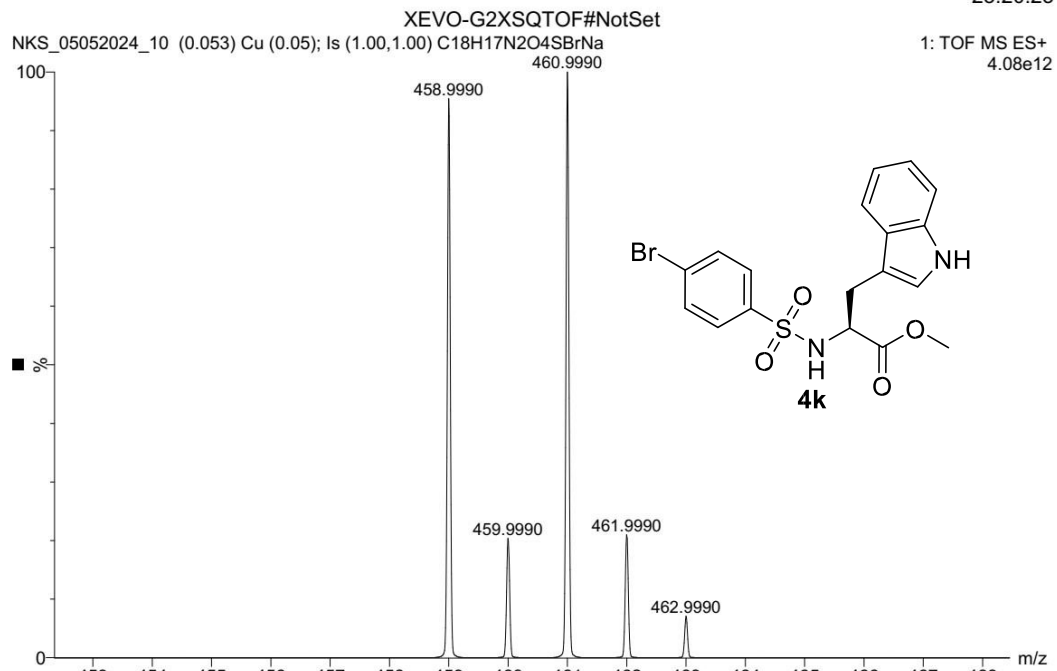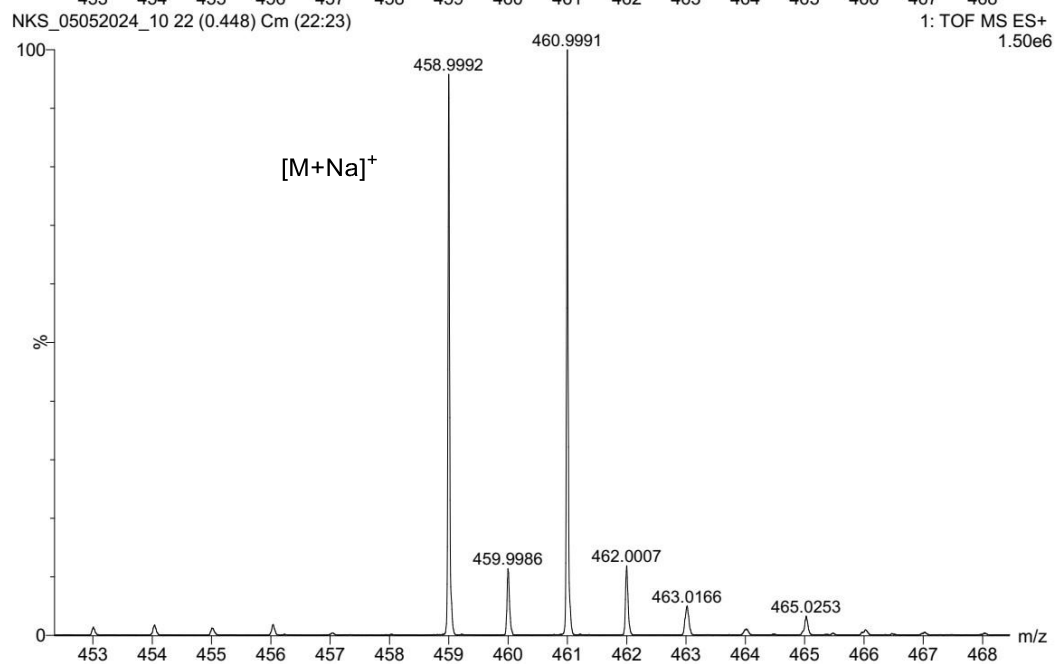



**Fig S46.** ESI-HRMS spectra of tryptophan derivative **4k**.

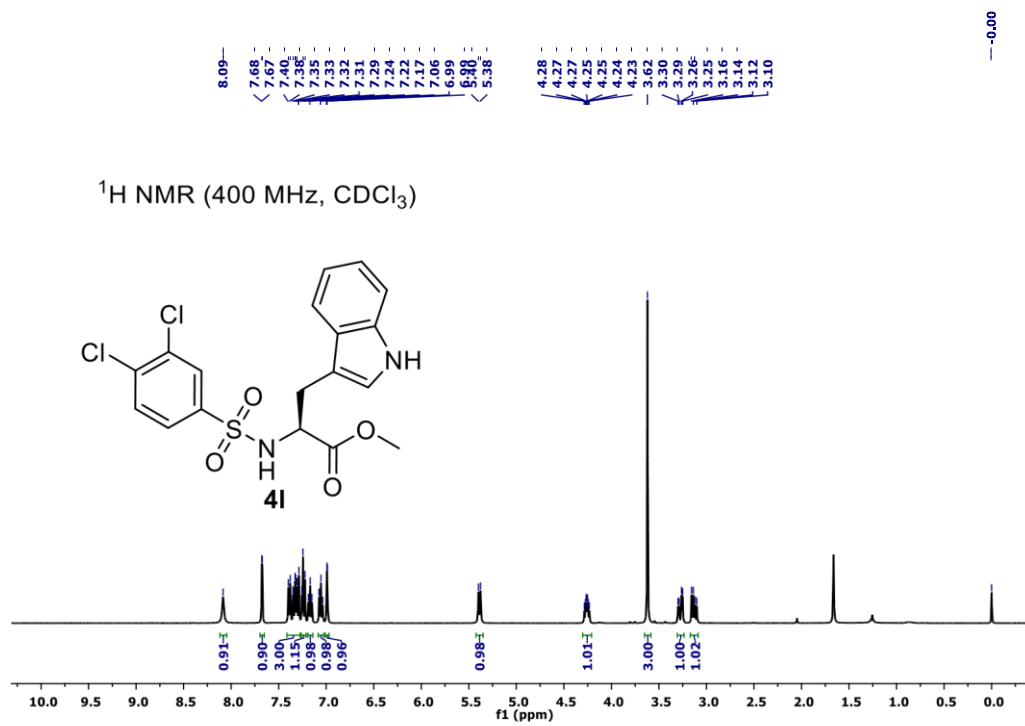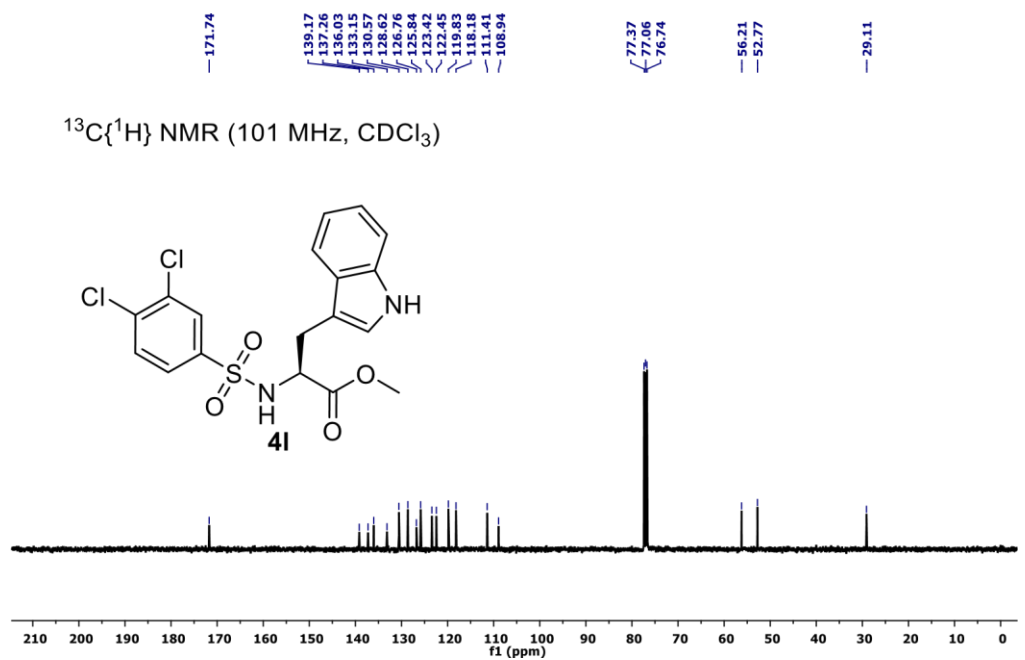

**Fig S47.** <sup>1</sup>H, <sup>13</sup>C {<sup>1</sup>H} NMR spectra of tryptophan derivative **4I**.

NKS\_CKJ\_1443

14-May-2024  
20:59:28

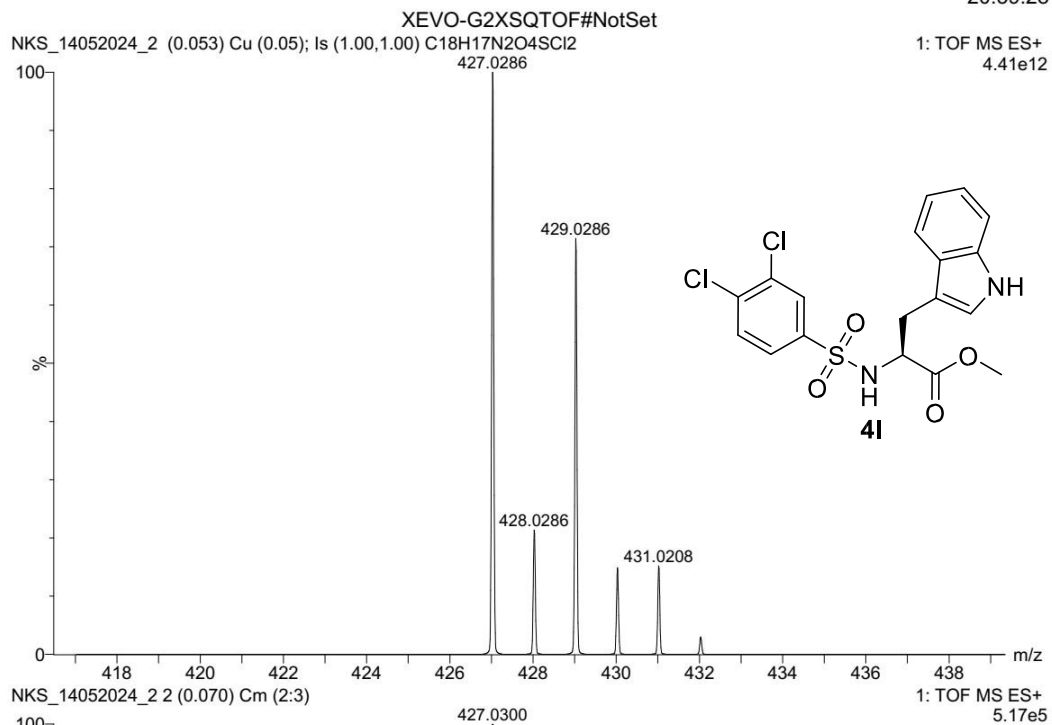

**Fig S48.** ESI-HRMS spectra of tryptophan derivative **4I**.

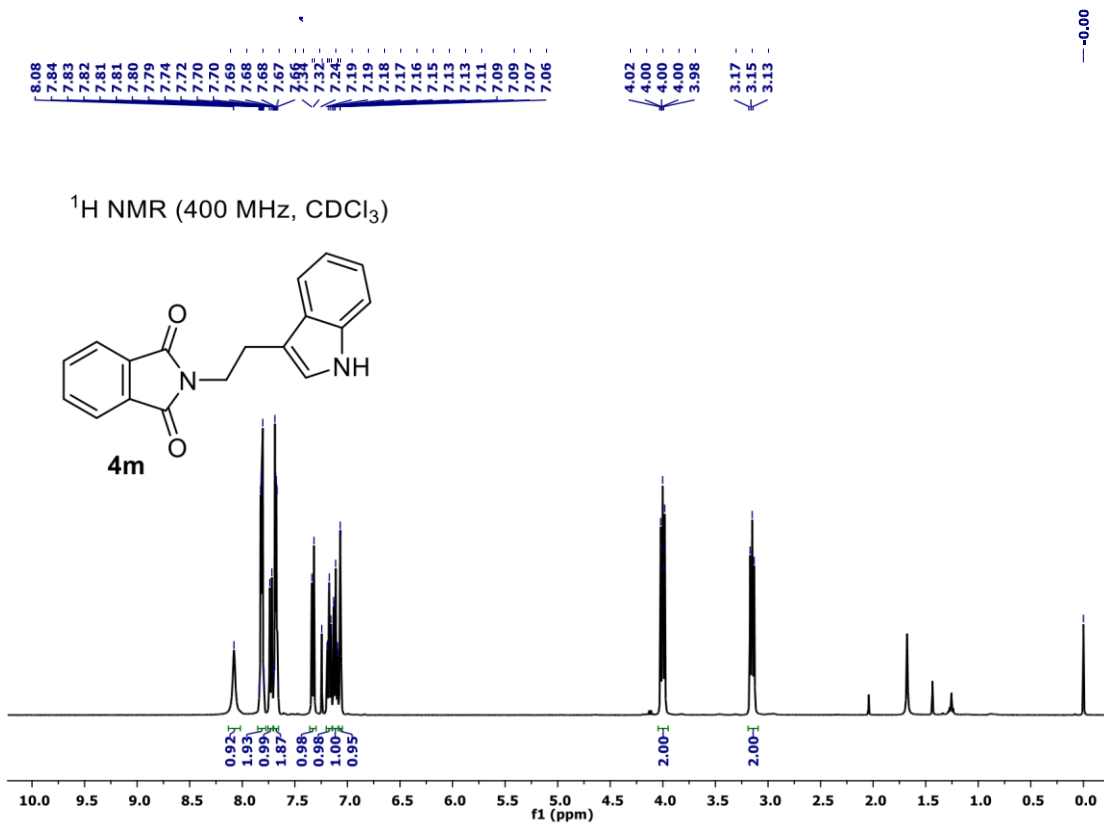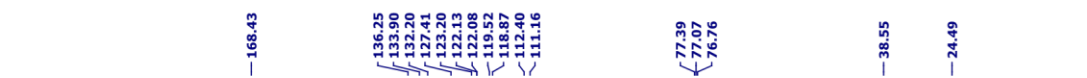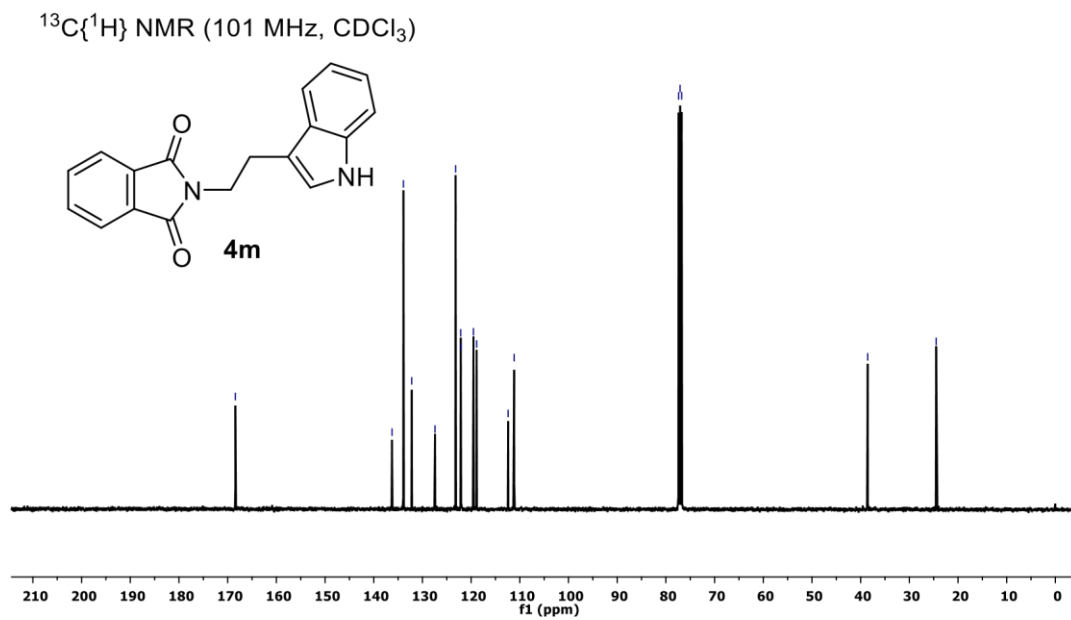

**Fig S49.**  $^1\text{H}$ ,  $^{13}\text{C}$   $\{^1\text{H}\}$  NMR spectra of tryptophan derivative **4m**.

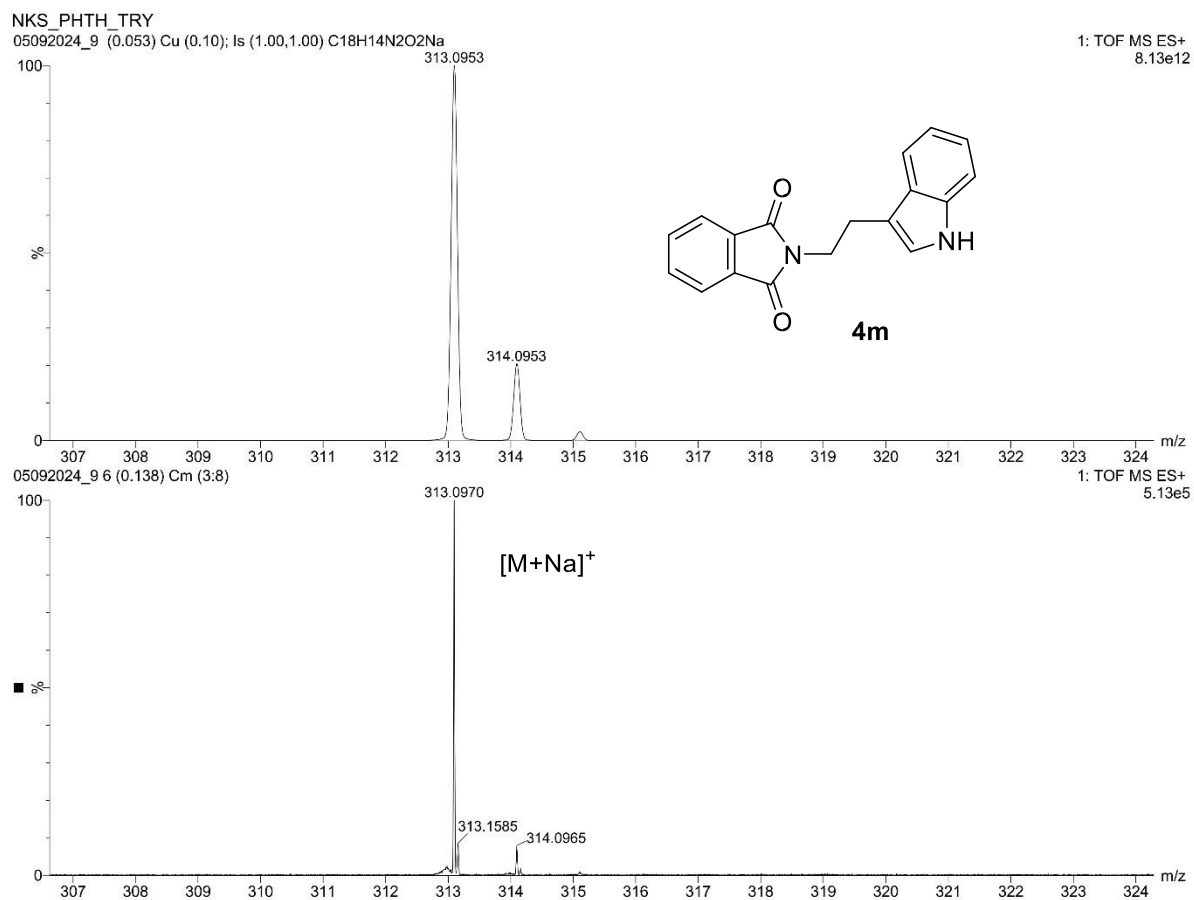

**Fig S50.** ESI-HRMS spectra of tryptophan derivative **4m**.

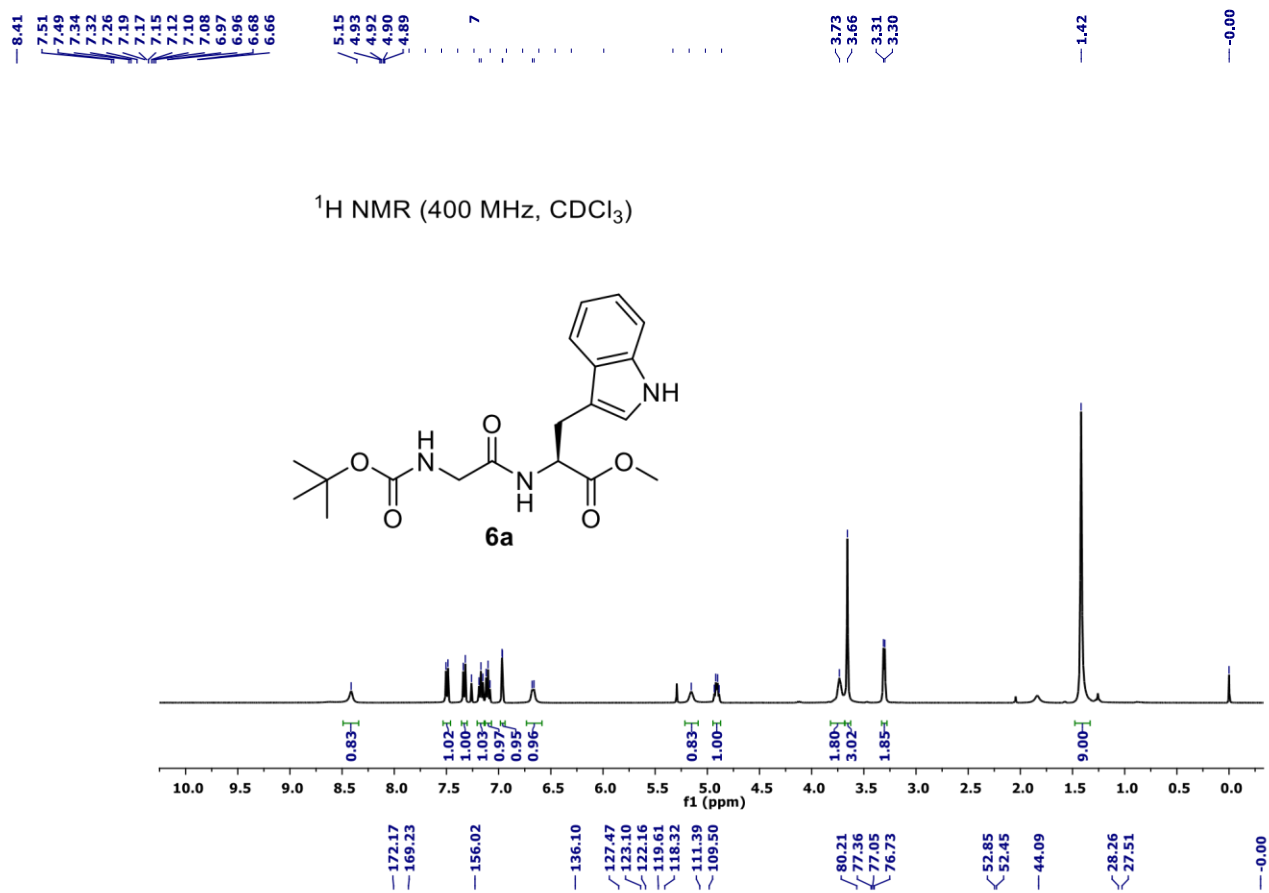

<sup>13</sup>C{<sup>1</sup>H} NMR (101 MHz, CDCl<sub>3</sub>)

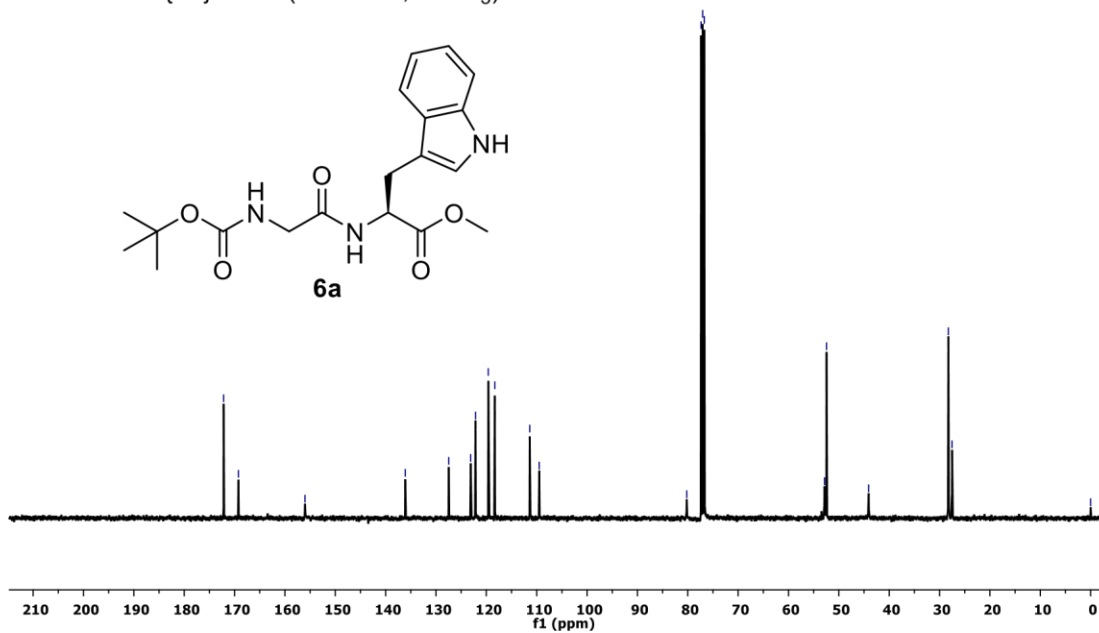

Fig S51. <sup>1</sup>H, <sup>13</sup>C {<sup>1</sup>H} NMR spectra of tryptophan-containing dipeptide **6a**.

NKS\_CKJ\_1378

11-May-2024  
19:46:07

XEVO-G2XSQTOF#NotSet

NKS\_11052024\_1 (0.053) Cu (0.05); ls (1.00,1.00) C<sub>19</sub>H<sub>25</sub>N<sub>3</sub>O<sub>5</sub>Na

1: TOF MS ES+  
7.94e12

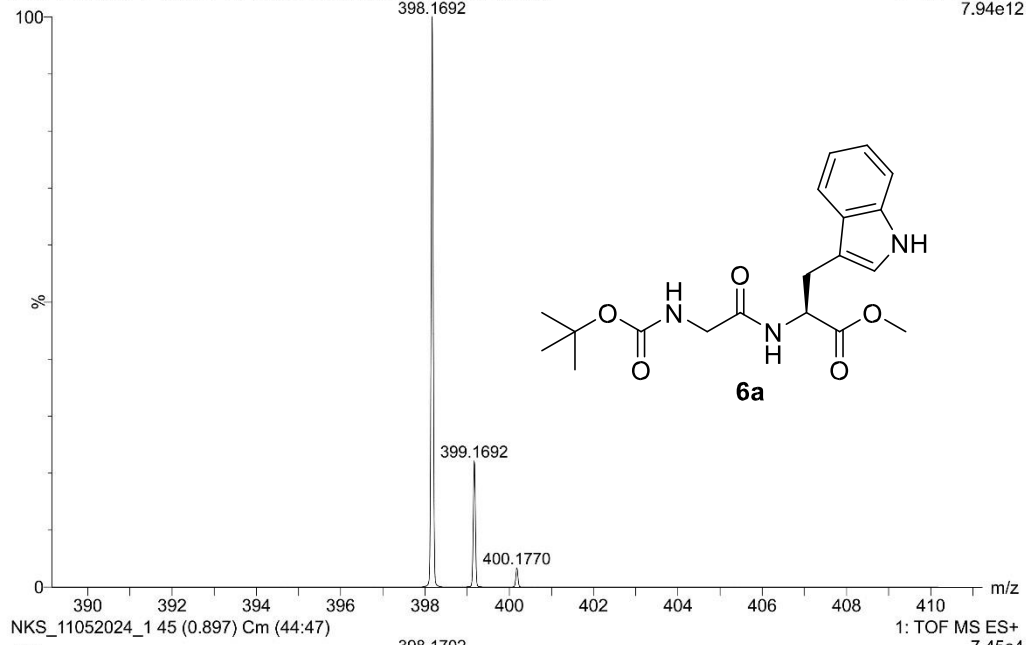

NKS\_11052024\_1 45 (0.897) Cm (44:47)

1: TOF MS ES+  
7.45e4

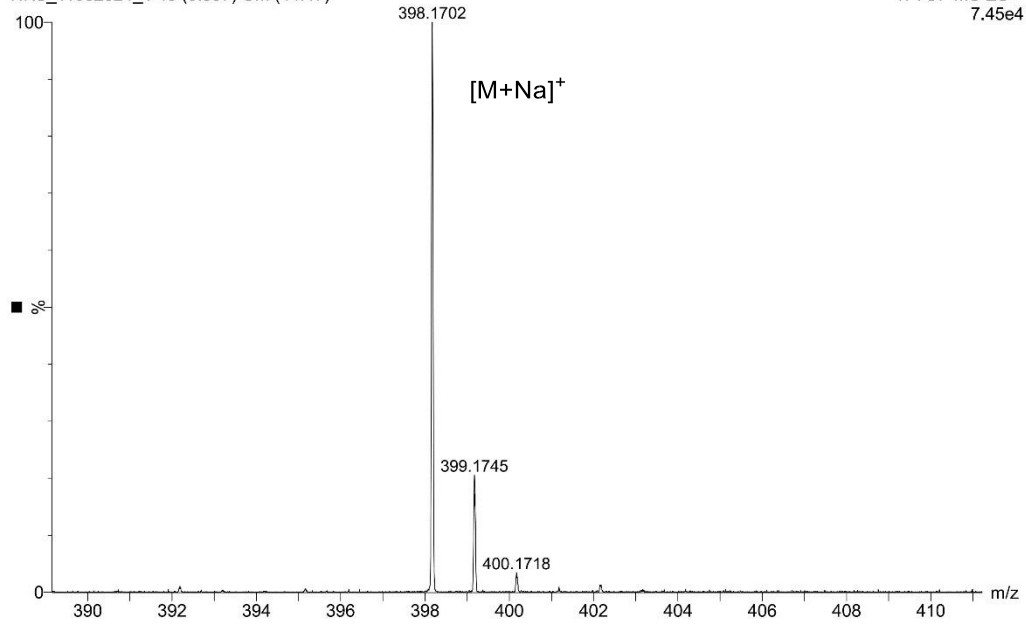

Fig S52. ESI-HRMS spectra of tryptophan-containing dipeptide **6a**.

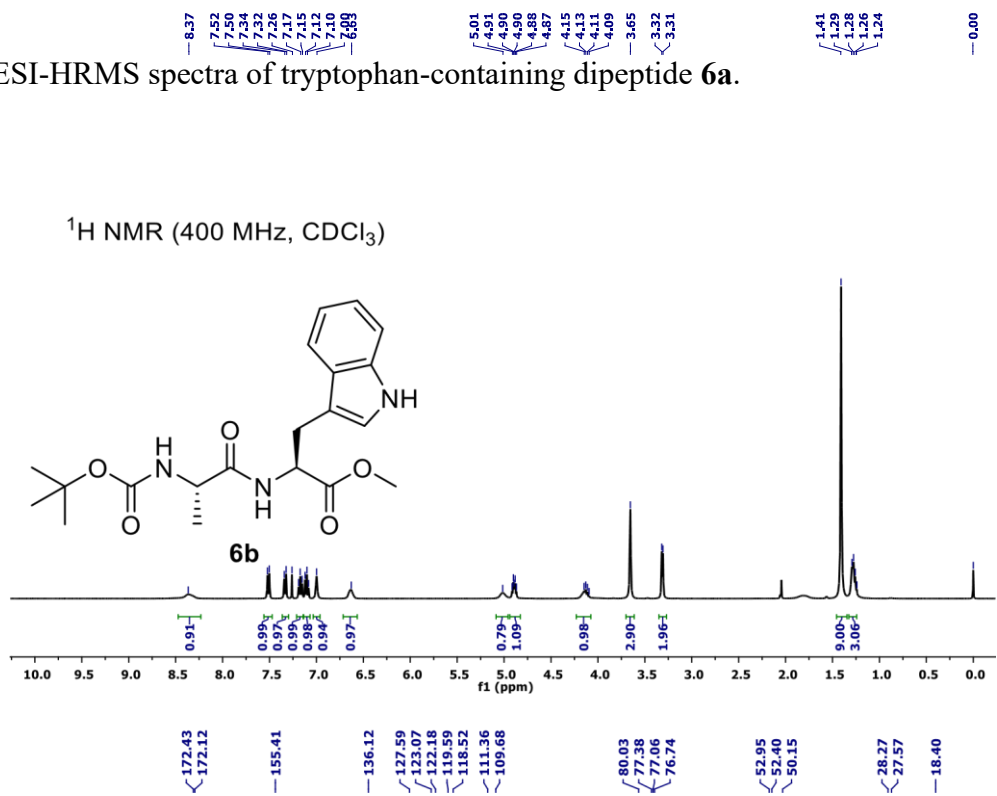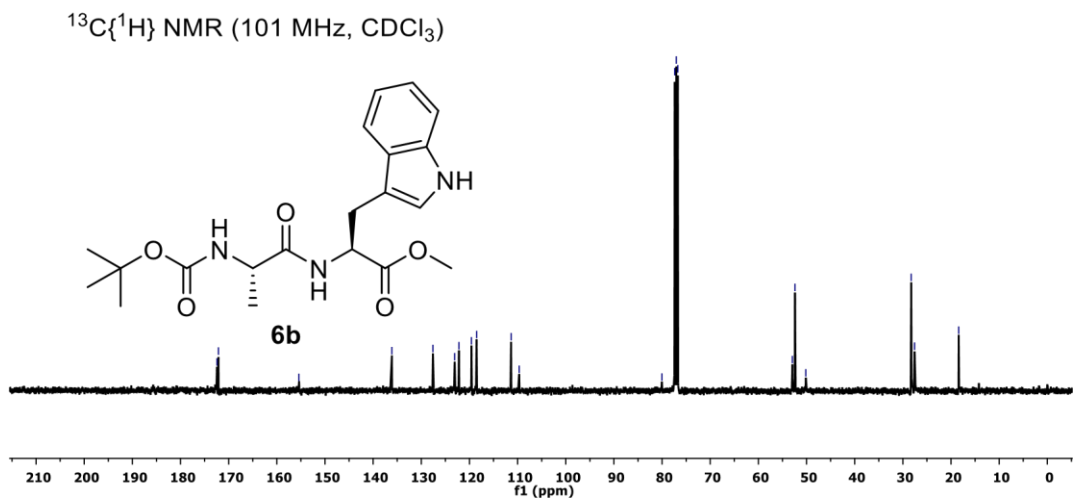

Fig S53. <sup>1</sup>H, <sup>13</sup>C {<sup>1</sup>H} NMR spectra of tryptophan-containing dipeptide **6b**.



NKS\_CKJ\_1373

11-May-2024  
19:59:25

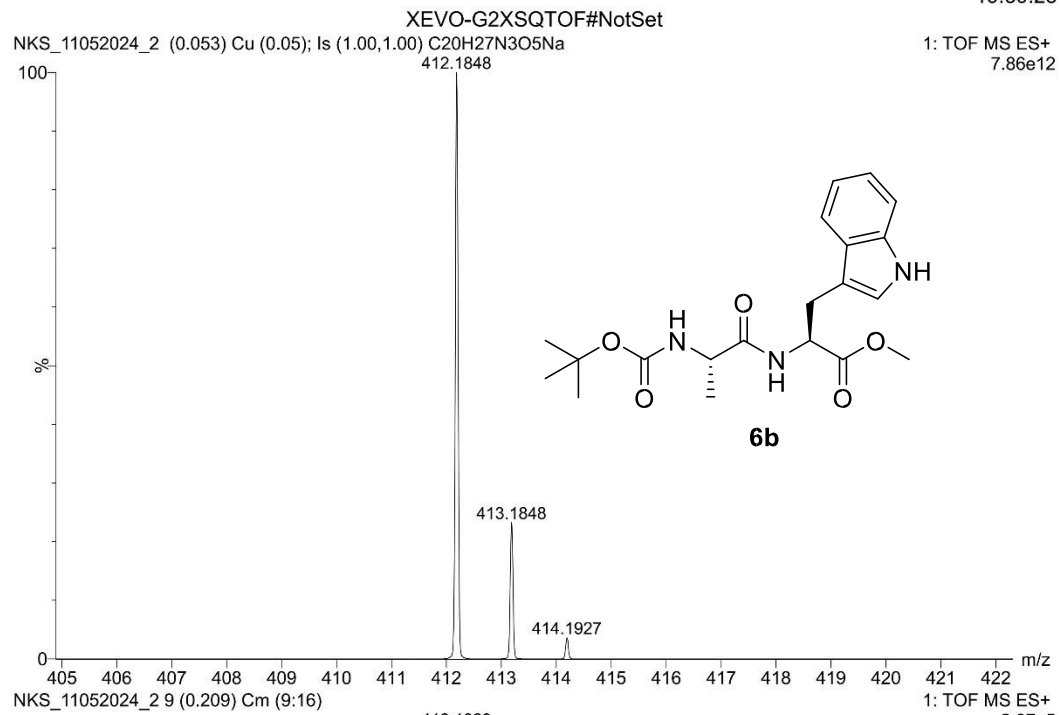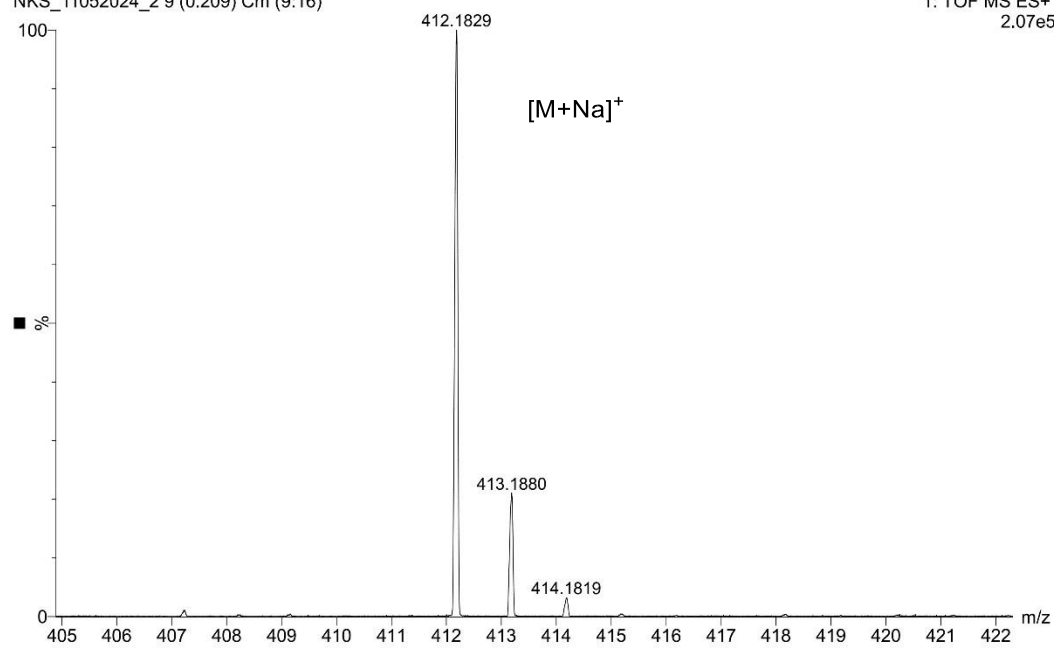

**Fig S54.** ESI-HRMS spectra of tryptophan-containing dipeptide **6b**.



CKJ\_1374

09-Mar-2024  
21:20:40

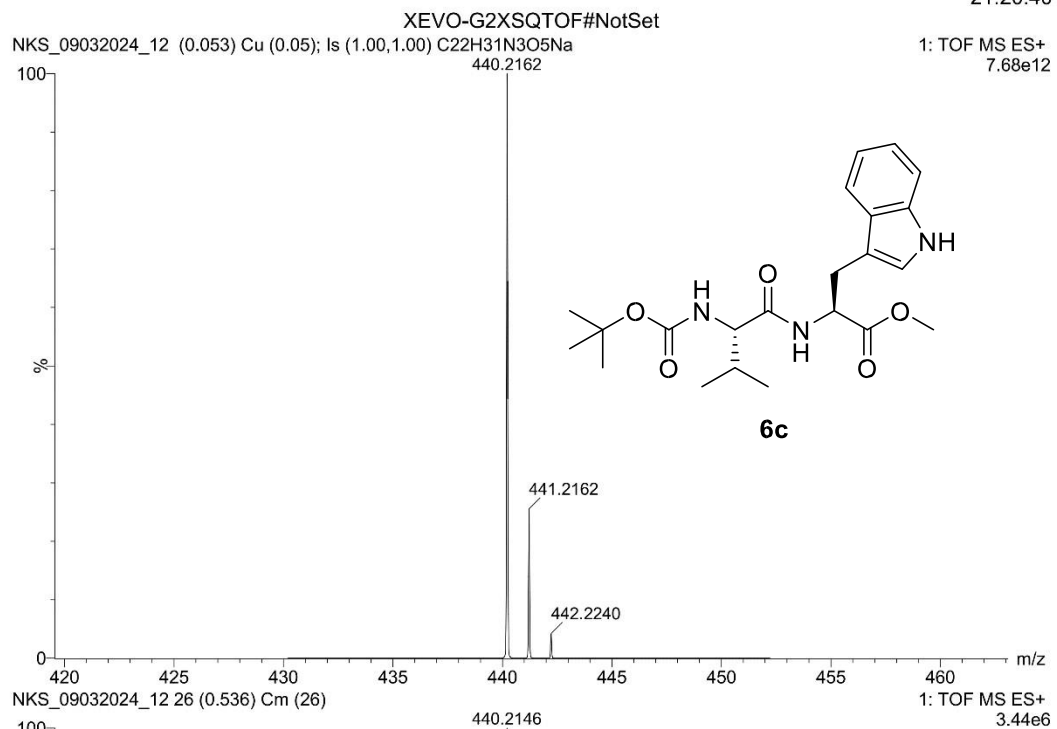

**Fig S56.** ESI-HRMS spectra of tryptophan-containing dipeptide **6c**.

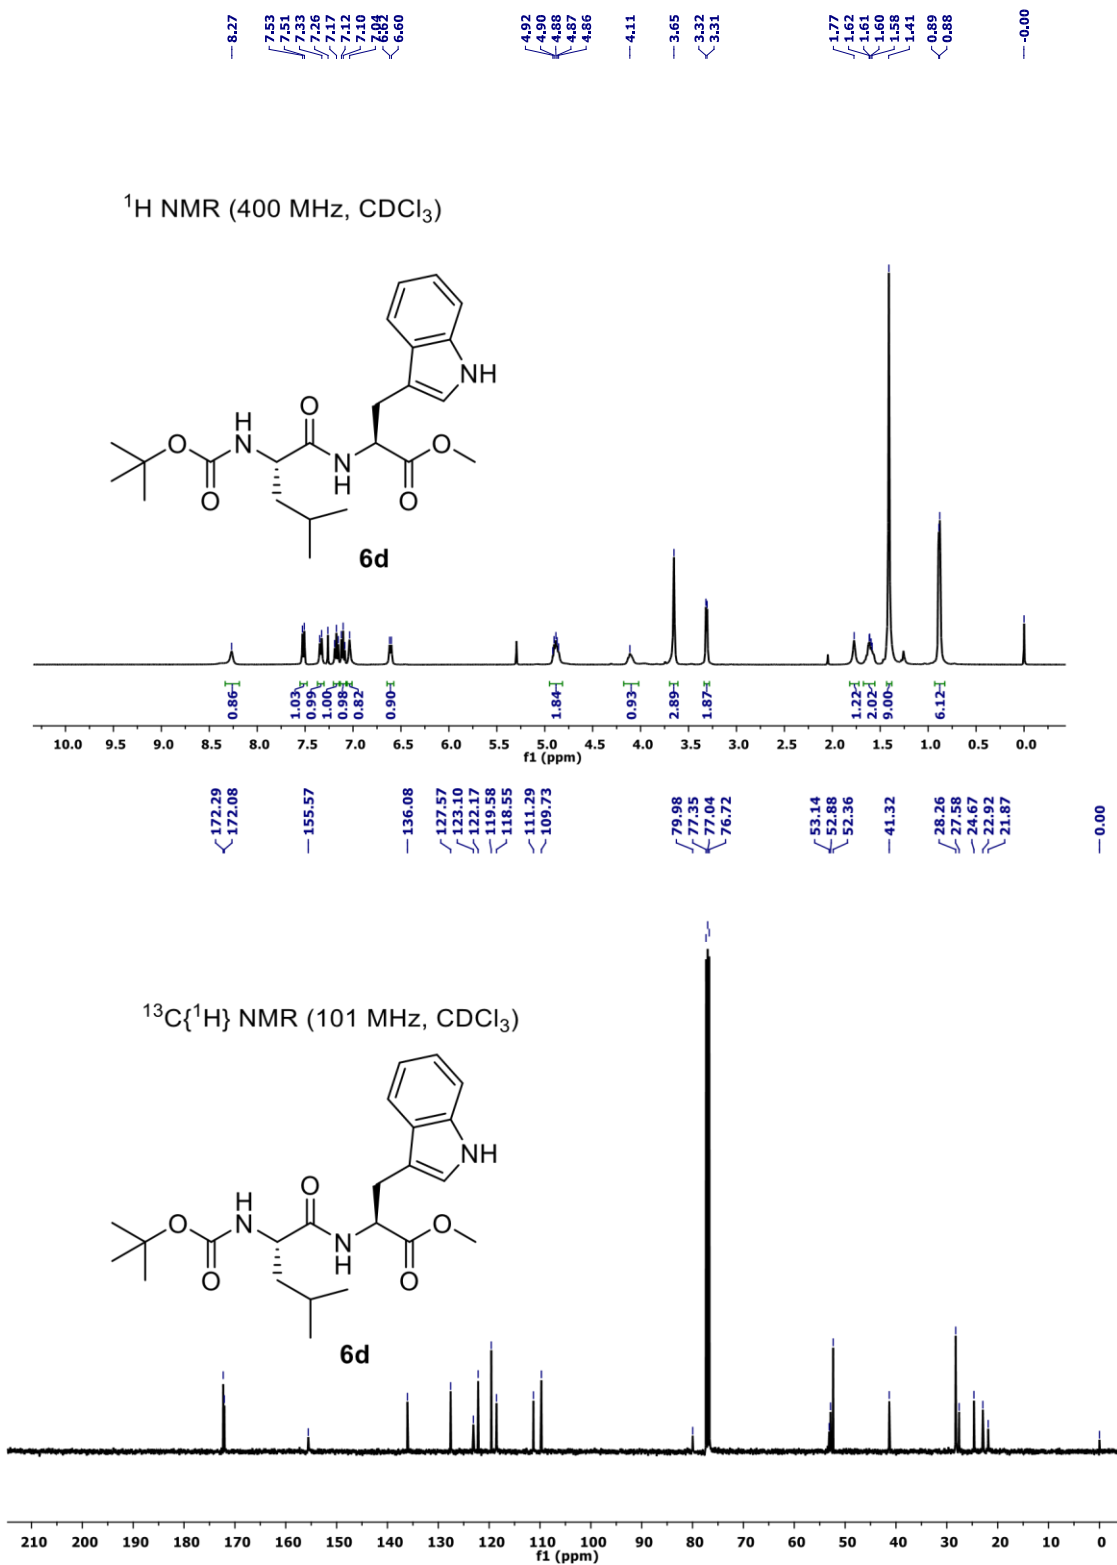

**Fig S57.** <sup>1</sup>H, <sup>13</sup>C {<sup>1</sup>H} NMR spectra of tryptophan-containing dipeptide **6d**.

NKS\_1381\_S

05092024\_10 (0.053) Cu (0.10); Is (1.00,1.00) C<sub>23</sub>H<sub>33</sub>N<sub>3</sub>O<sub>5</sub>Na

1: TOF MS ES+  
7.60e12

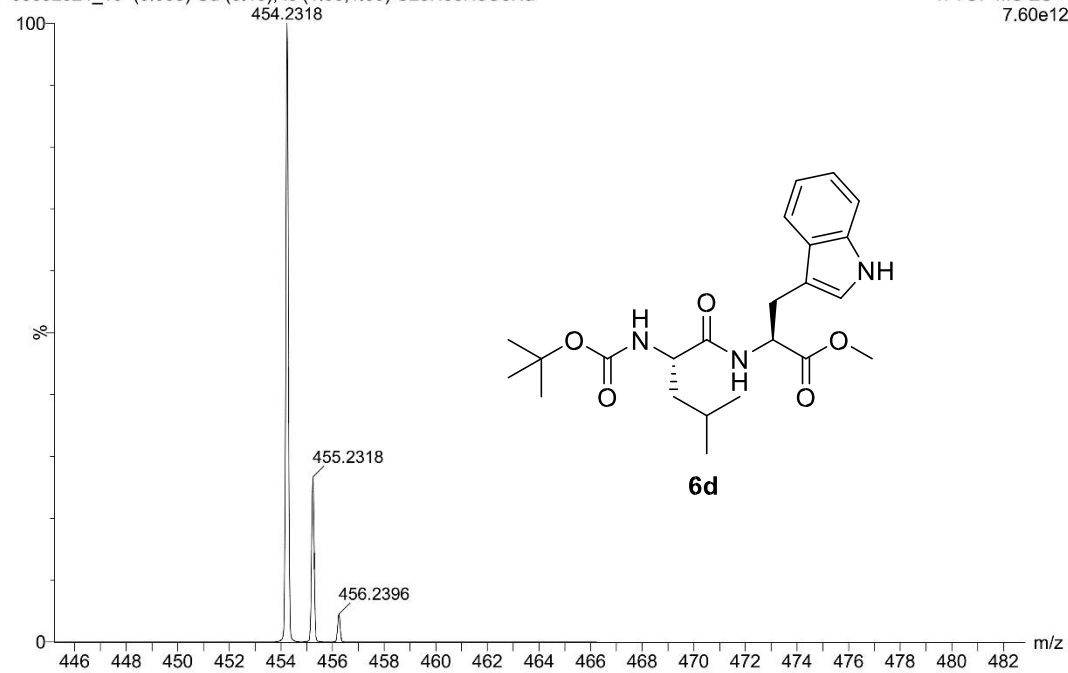

05092024\_10 31 (0.620) Cm (31:32)

1: TOF MS ES+  
7.99e6

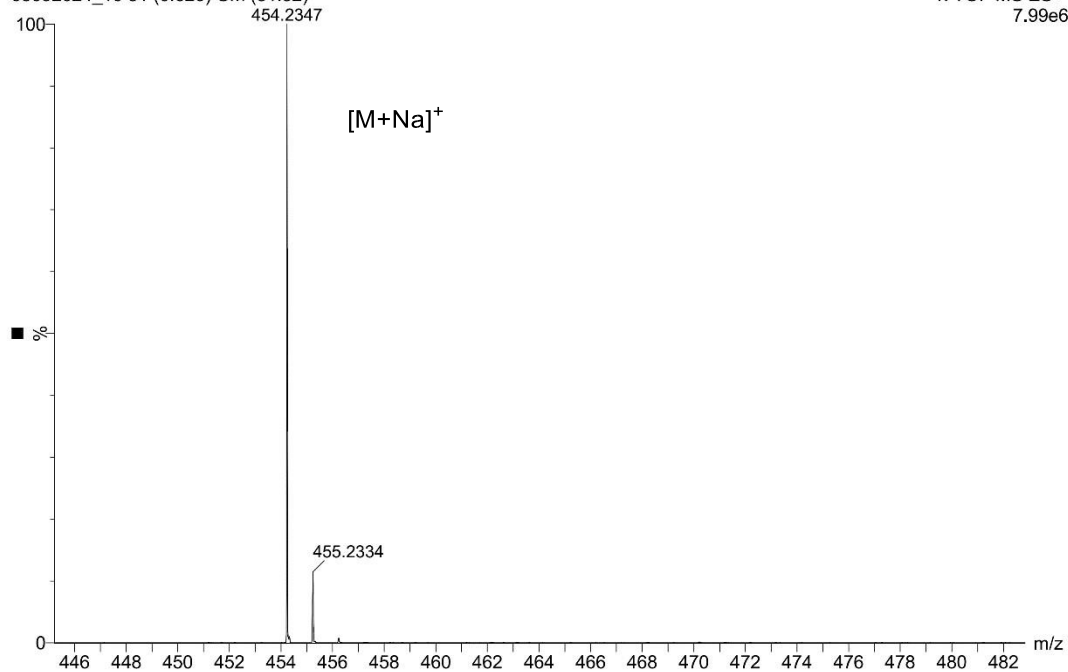

.....

**Fig S58.** ESI-HRMS spectra of tryptophan-containing dipeptide **6d**.

**Fig**  $^1\text{H}$ ,  $^{13}\text{C}$   $\{^1\text{H}\}$  NMR spectra of tryptophan-containing dipeptide

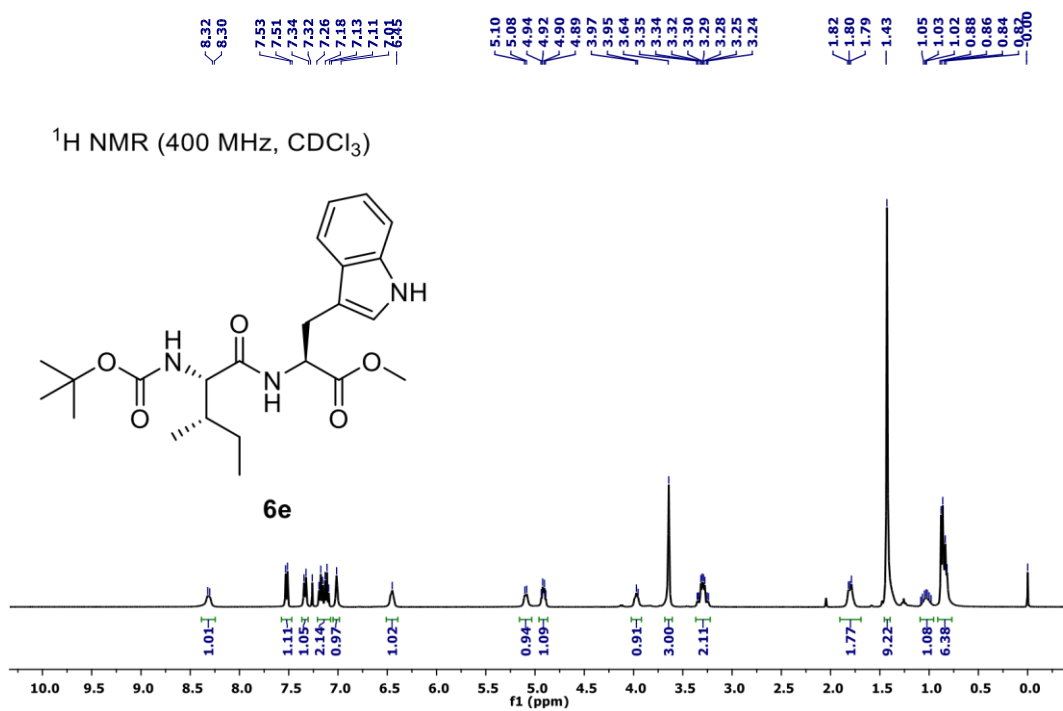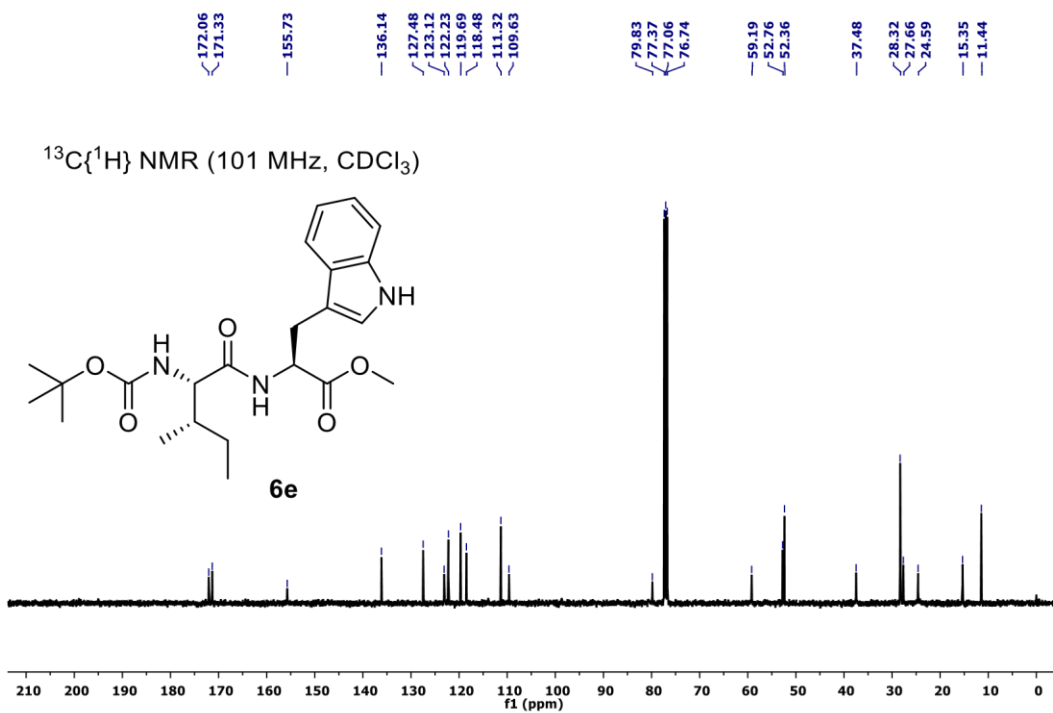

S59.

6e.

Fig <sup>1</sup>H, <sup>13</sup>C {<sup>1</sup>H} NMR spectra of tryptophan-containing dipeptide

.....

**Fig**  $^1\text{H}$ ,  $^{13}\text{C}$   $\{^1\text{H}\}$  NMR spectra of tryptophan-containing dipeptide



CKJ\_1356

09-Mar-2024  
23:16:14

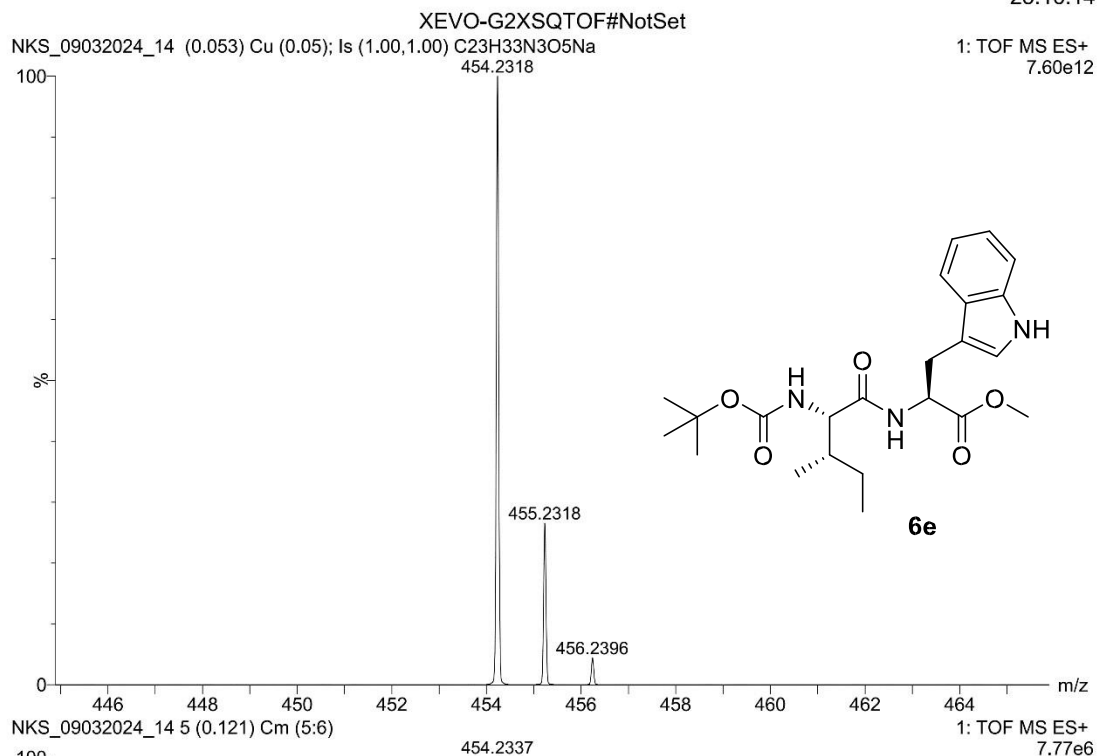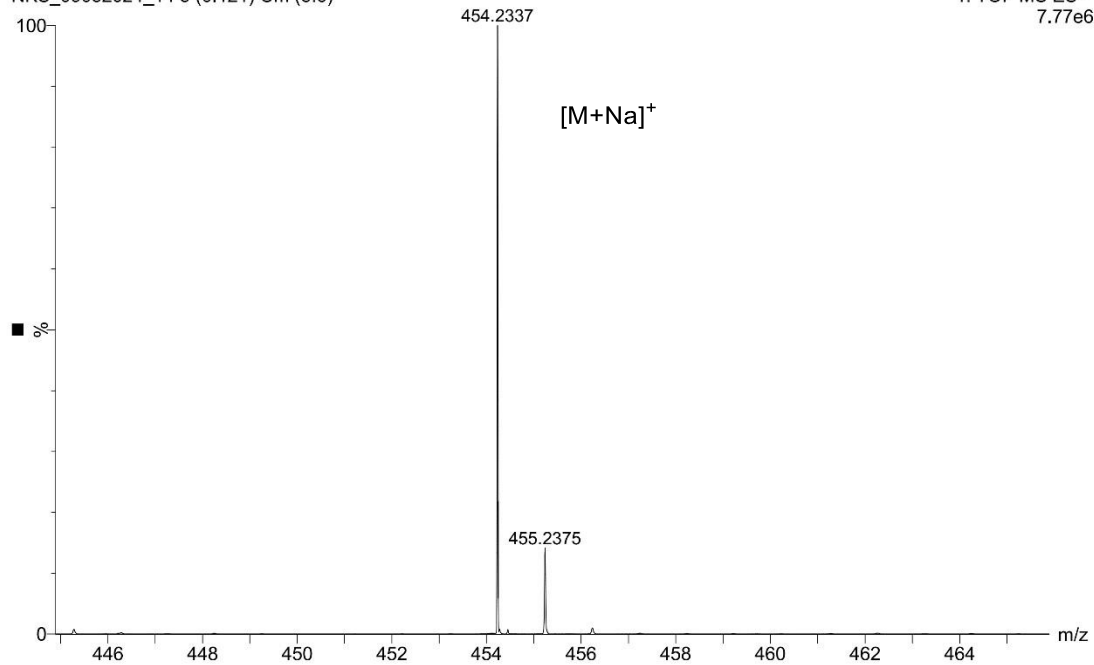

**Fig S60.** ESI-HRMS spectra of tryptophan-containing dipeptide **6e**.

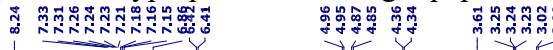

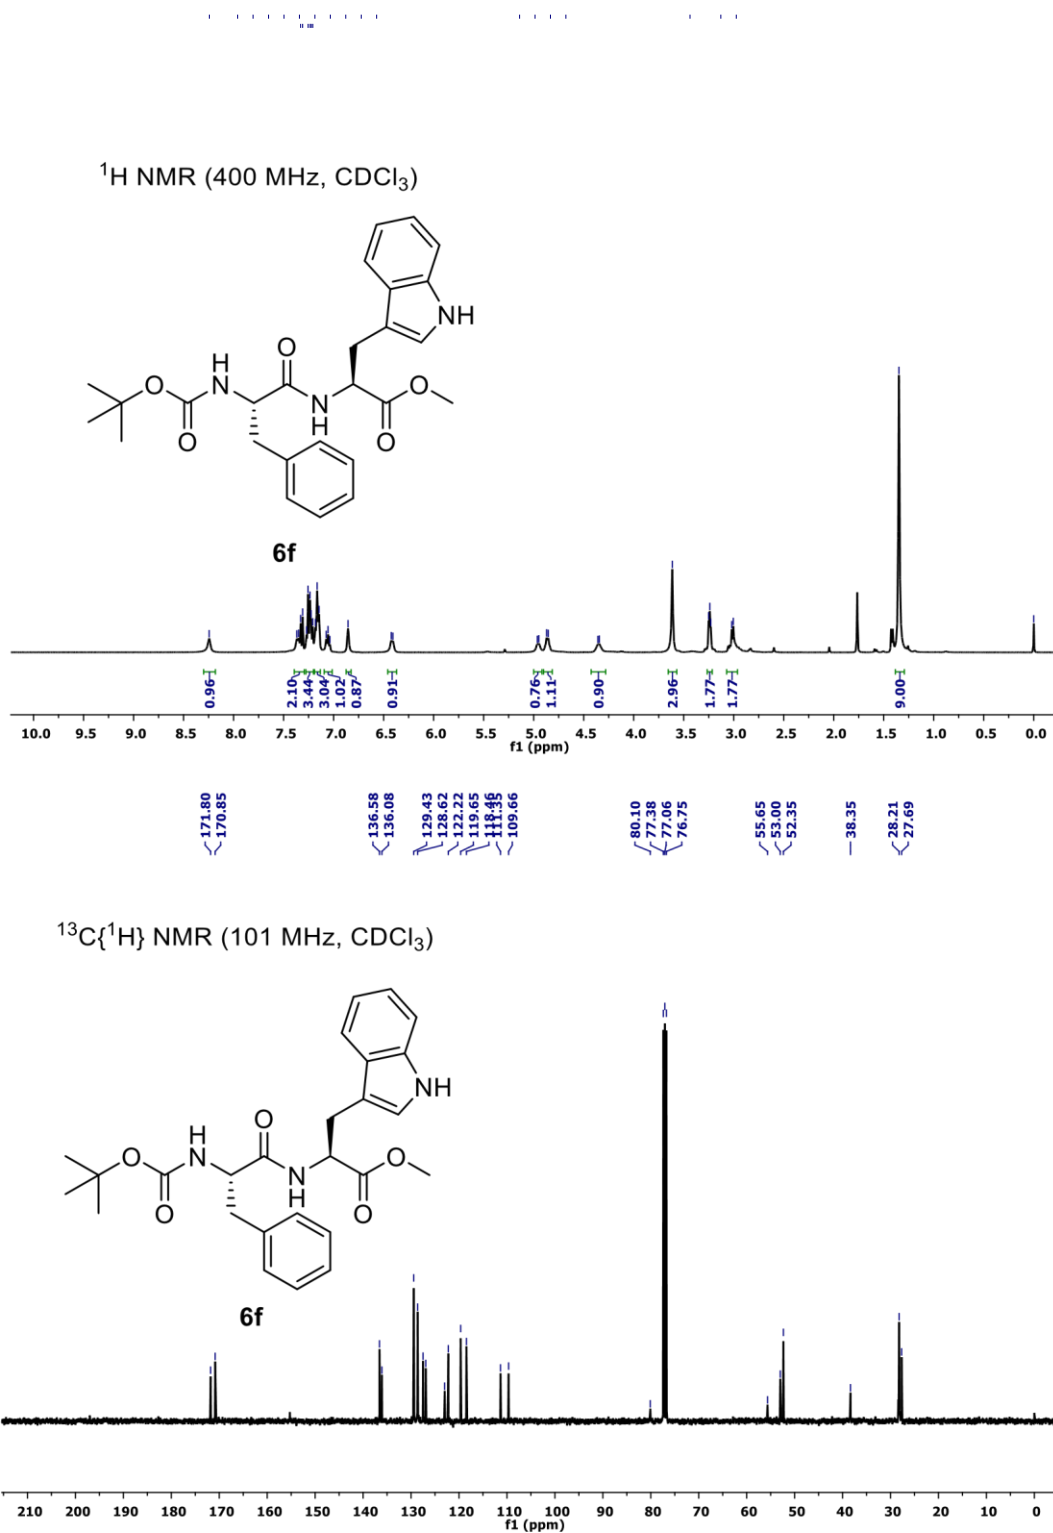

**Fig** <sup>1</sup>H, <sup>13</sup>C {<sup>1</sup>H} NMR spectra of tryptophan-containing dipeptide

S61.

6f.

NKS\_CKJ\_1387

14-May-2024  
21:25:23

XEVO-G2XSQTOF#NotSet  
NKS\_14052024\_3 (0.053) Cu (0.05); ls (1.00,1.00) C26H31N3O5Na

1: TOF MS ES+  
7.36e12

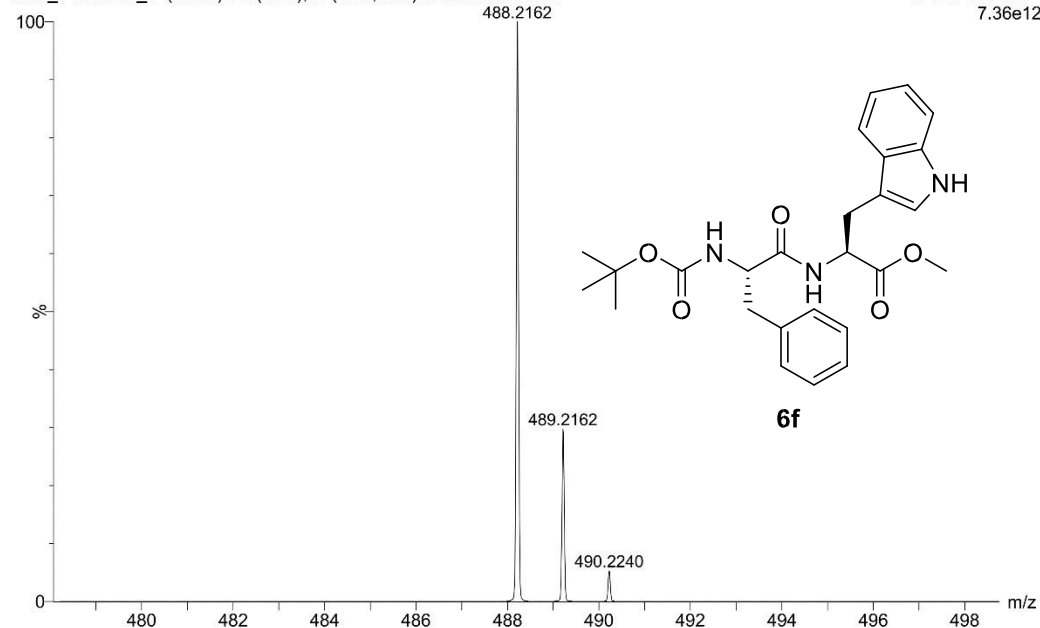

NKS\_14052024\_3 3 (0.087) Cm (3:4)

1: TOF MS ES+  
4.88e6

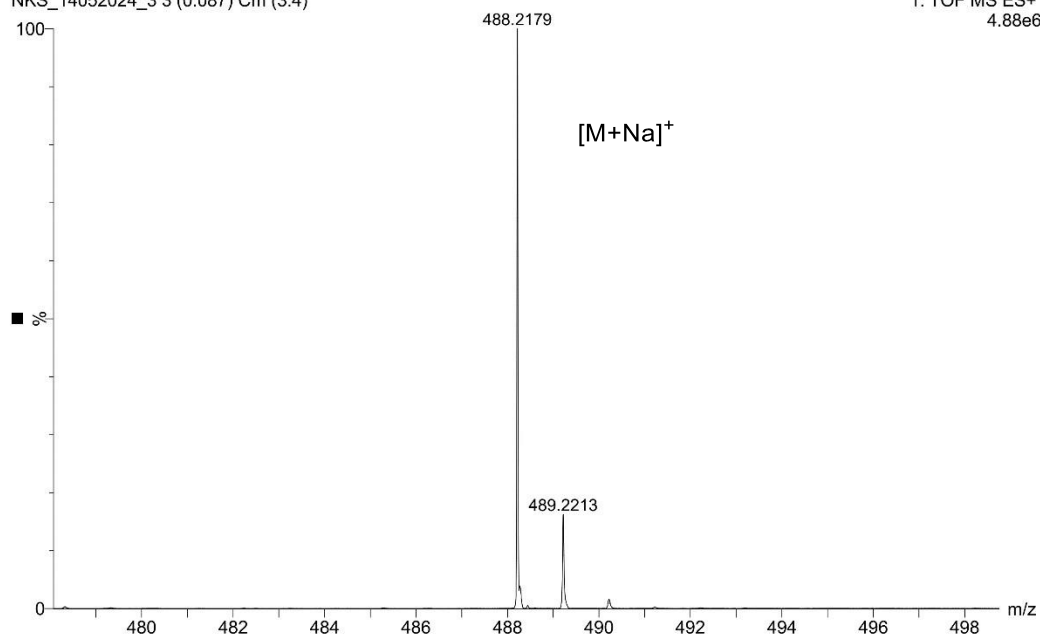

Fig S62. ESI-HRMS spectra of tryptophan-containing dipeptide **6f**.

.....

**Fig**  $^1\text{H}$ ,  $^{13}\text{C}$   $\{^1\text{H}\}$  NMR spectra of tryptophan-containing dipeptide

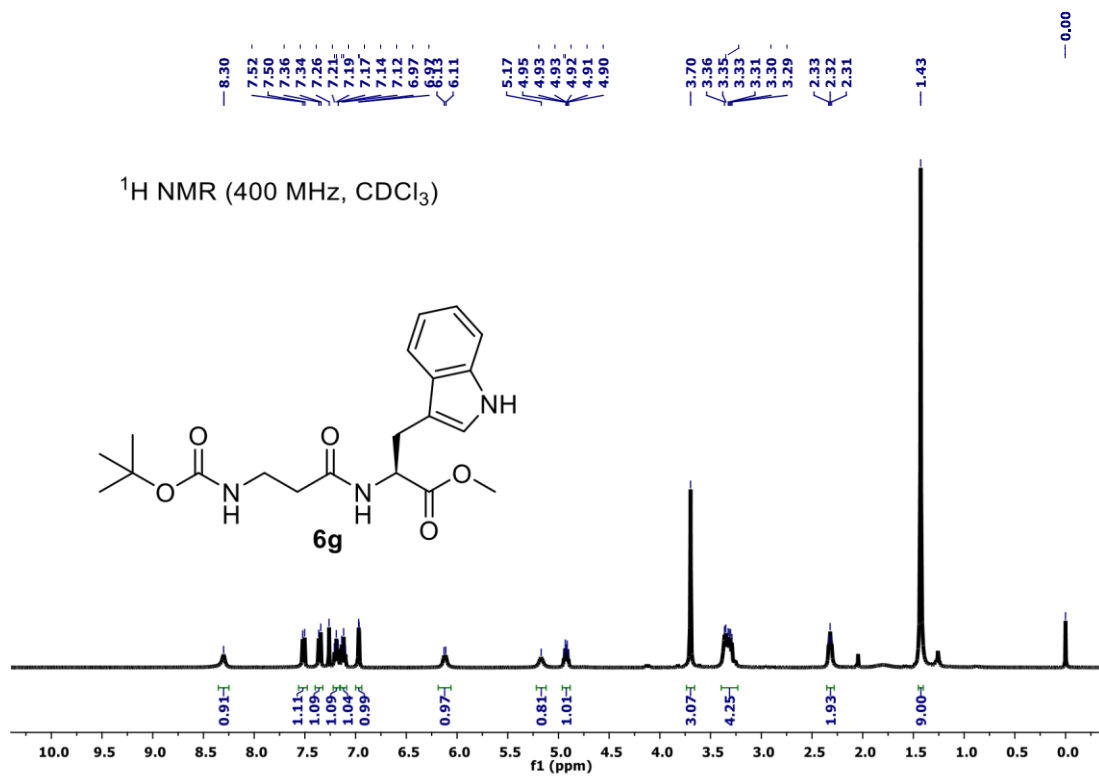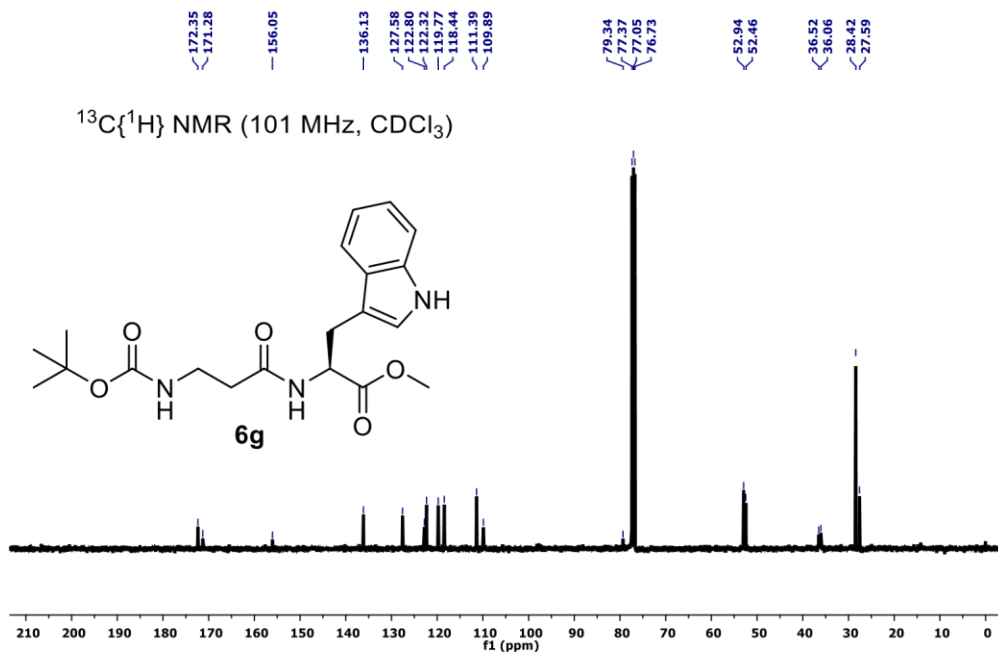

S63. **6g**.  
 Fig <sup>1</sup>H, <sup>13</sup>C {<sup>1</sup>H} NMR spectra of tryptophan-containing dipeptide

.....

NKS\_CKJ\_1378

10-May-2024  
01:15:53

XEVO-G2XSQTOF#NotSet

NKS\_09052024\_10 (0.053) Cu (0.05); Is (1.00,1.00) C<sub>20</sub>H<sub>27</sub>N<sub>3</sub>O<sub>5</sub>Na

1: TOF MS ES+  
7.86e12

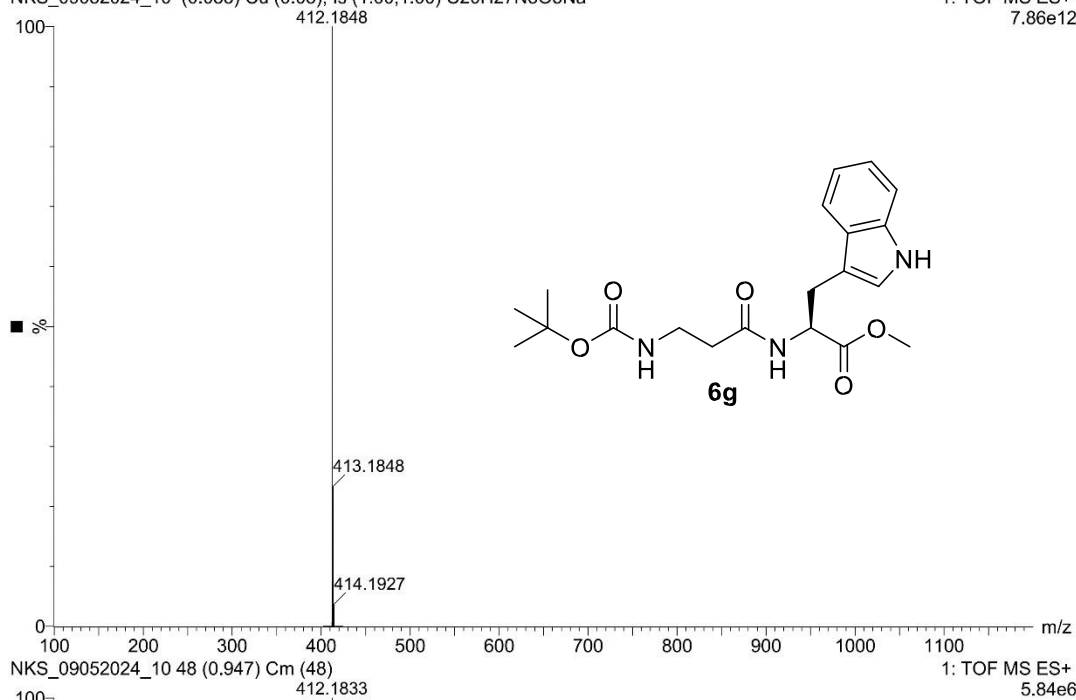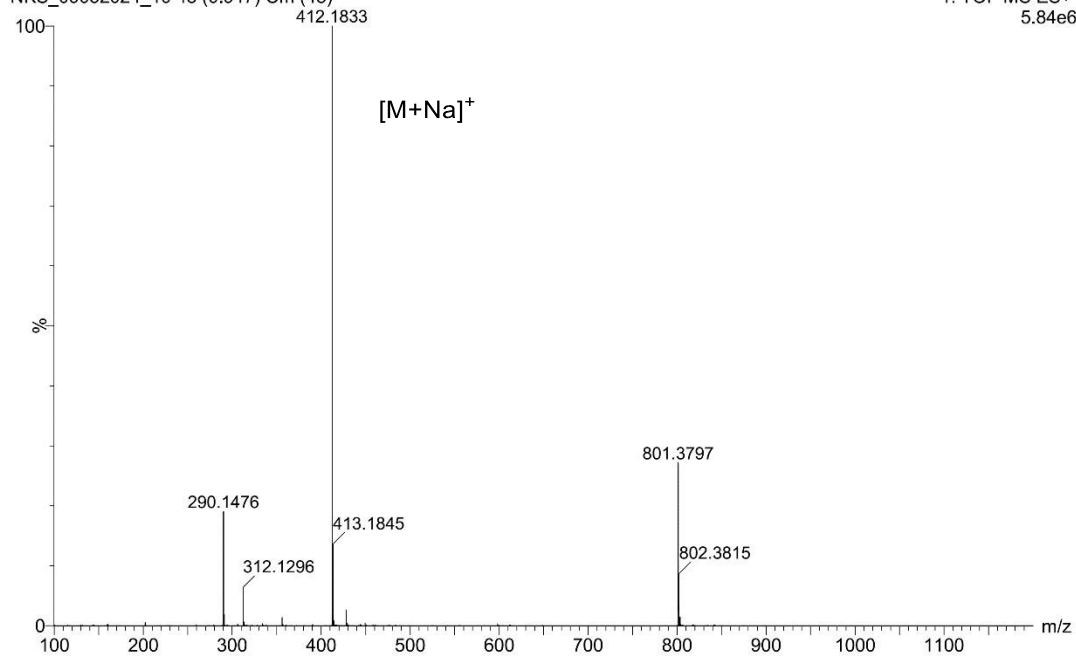

**Fig S64.** ESI-HRMS spectra of tryptophan-containing dipeptide **6g**.

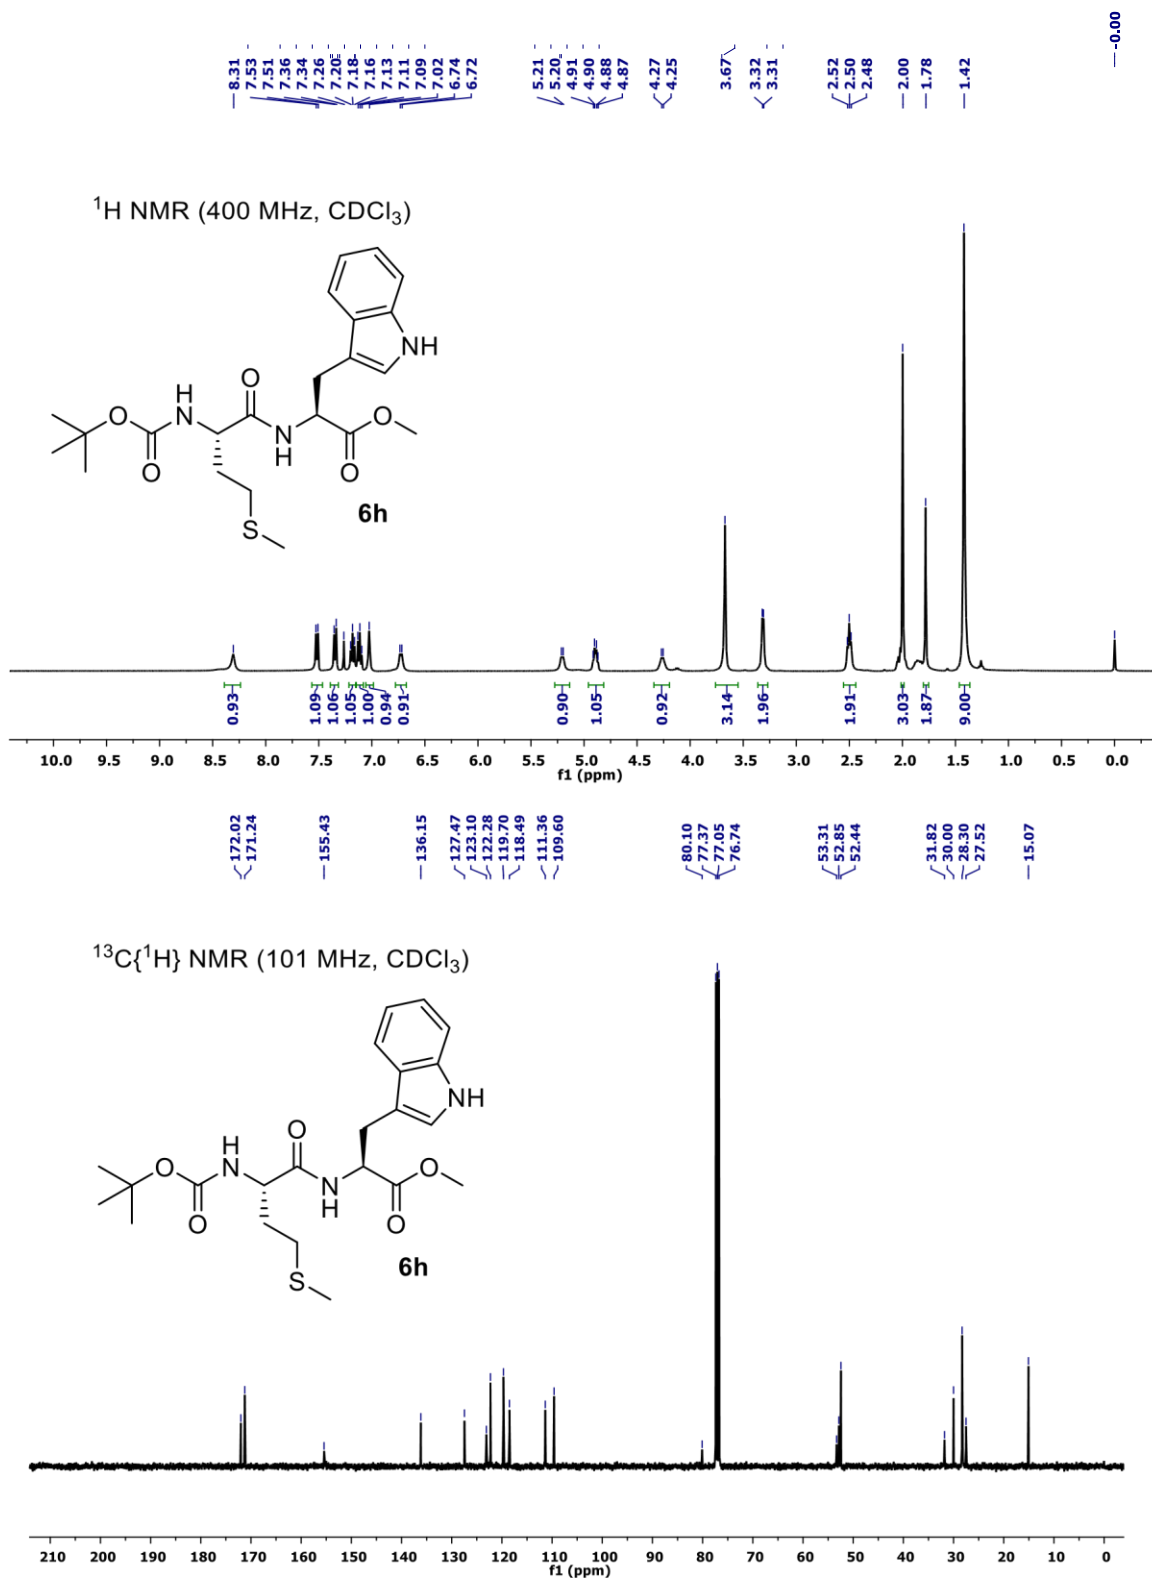

**Fig S65.** <sup>1</sup>H, <sup>13</sup>C {<sup>1</sup>H} NMR spectra of tryptophan-containing dipeptide **6h**.



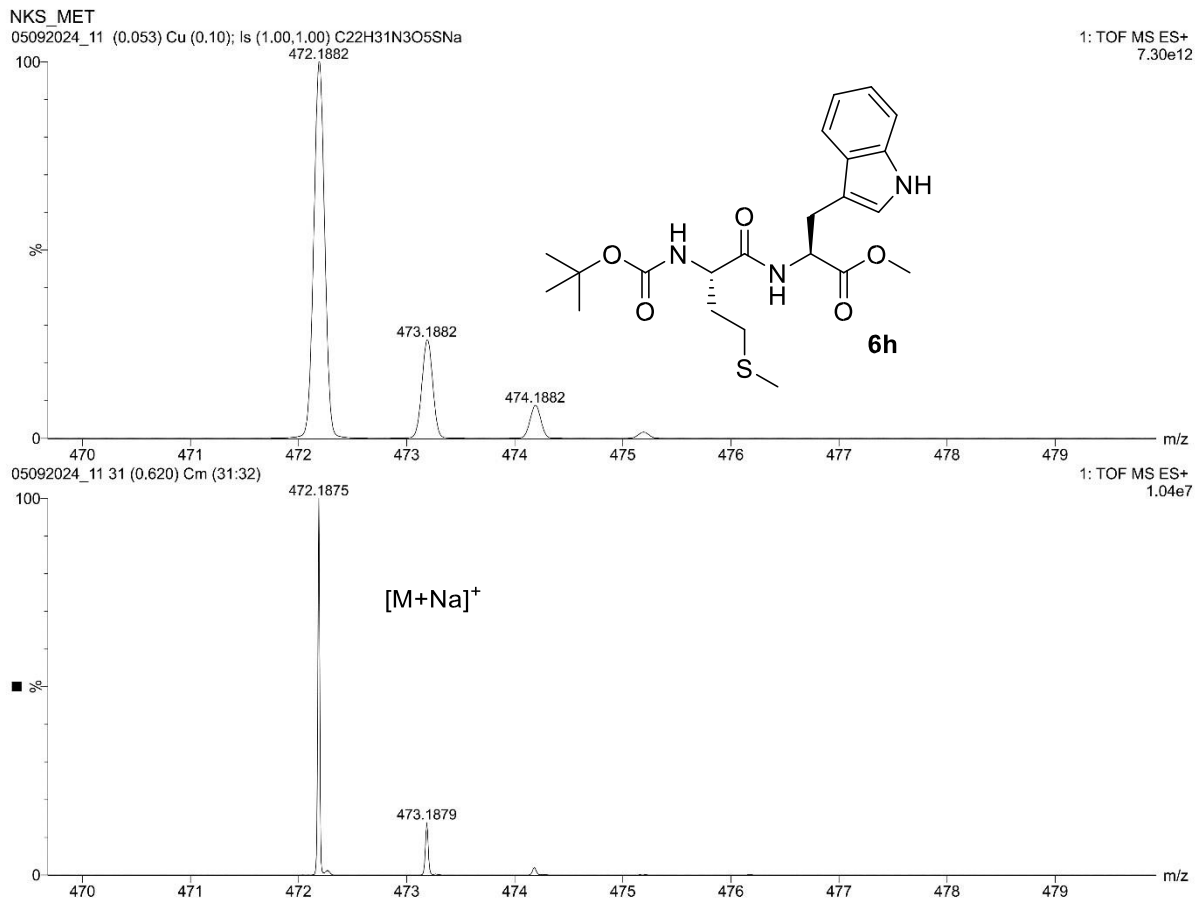

**Fig S66.** ESI-HRMS spectra of tryptophan-containing dipeptide **6h**.

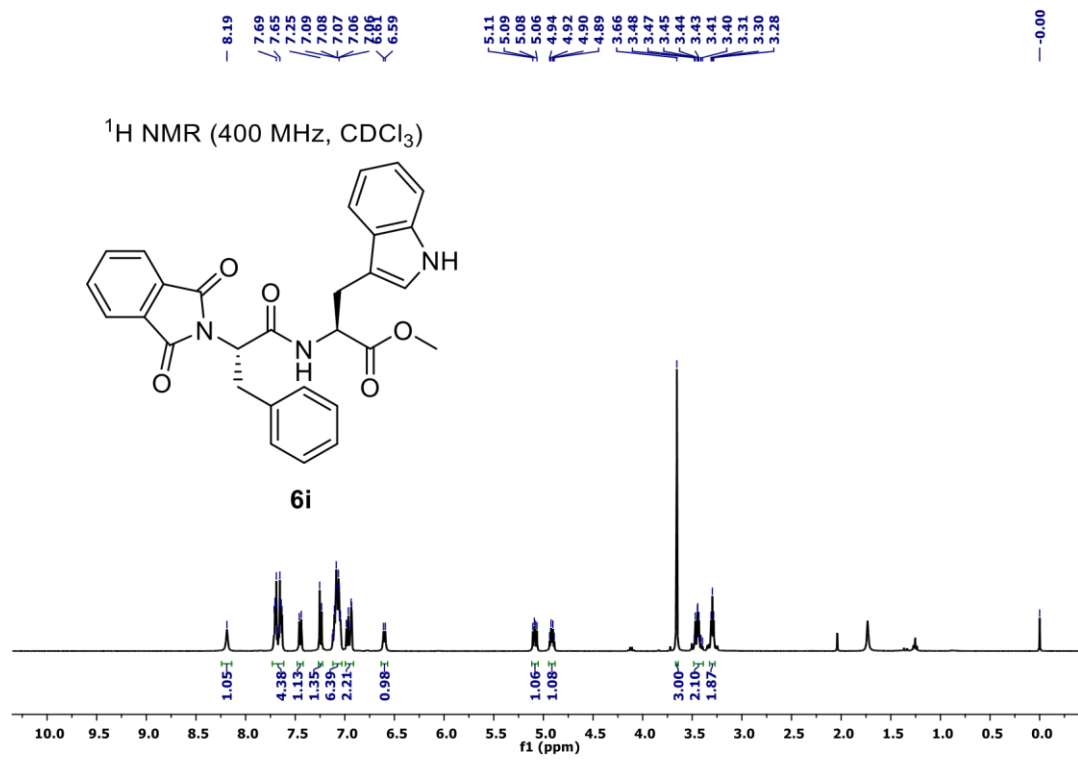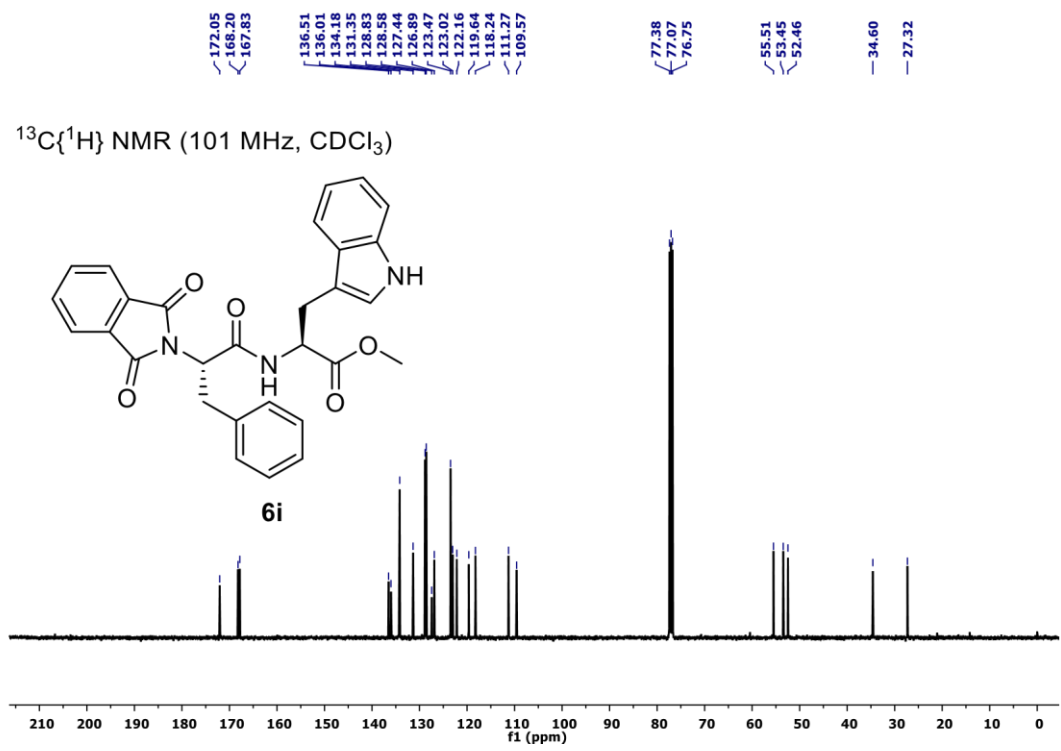

**Fig S67.**  $^1\text{H}$ ,  $^{13}\text{C}$   $\{^1\text{H}\}$  NMR spectra of tryptophan-containing dipeptide **6i**.

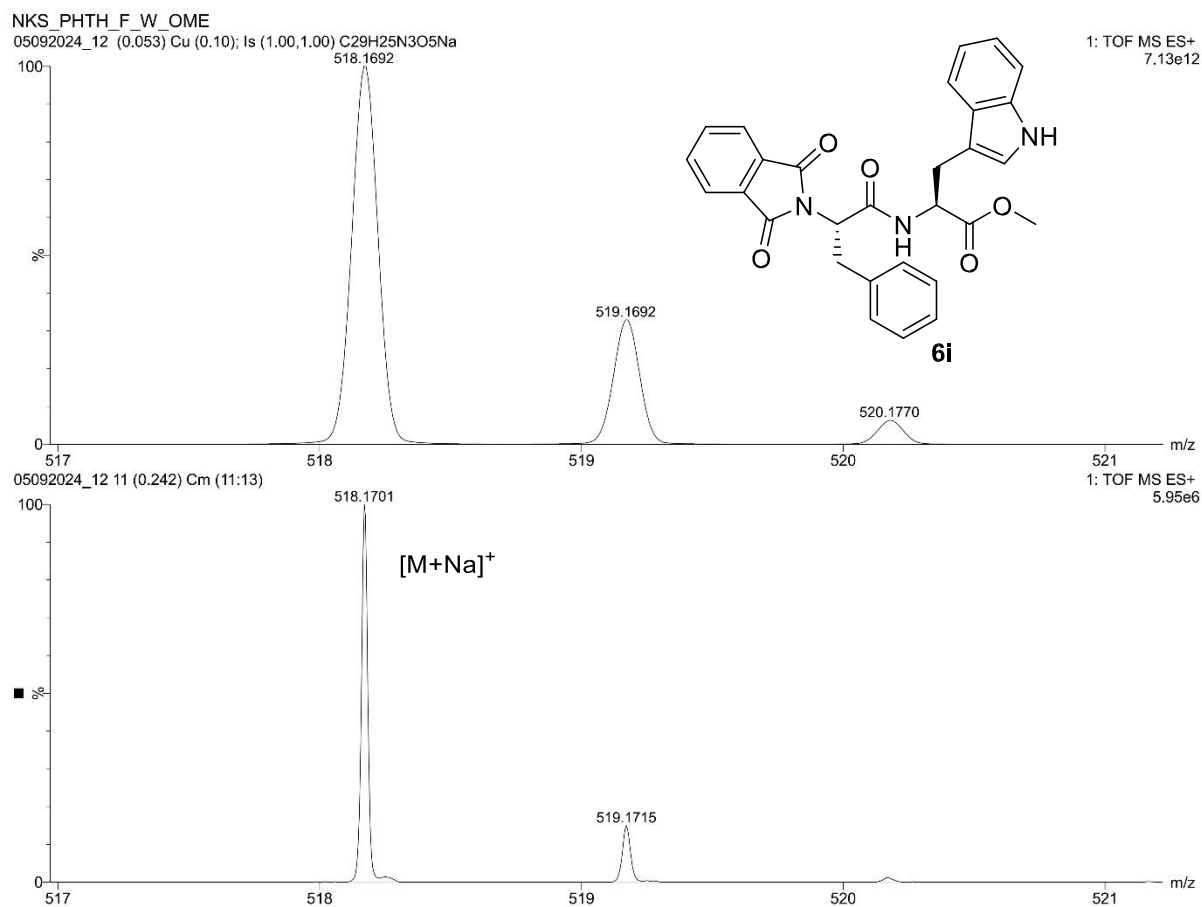

**Fig S68.** ESI-HRMS spectra of tryptophan-containing dipeptide **6i**.

## 2. NMR and Mass Spectra of Kynurenine Derivatives (**3a-3l/5a-5m/7a-7i**)

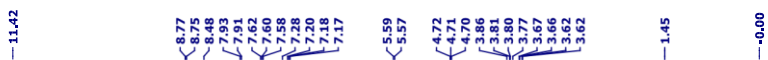

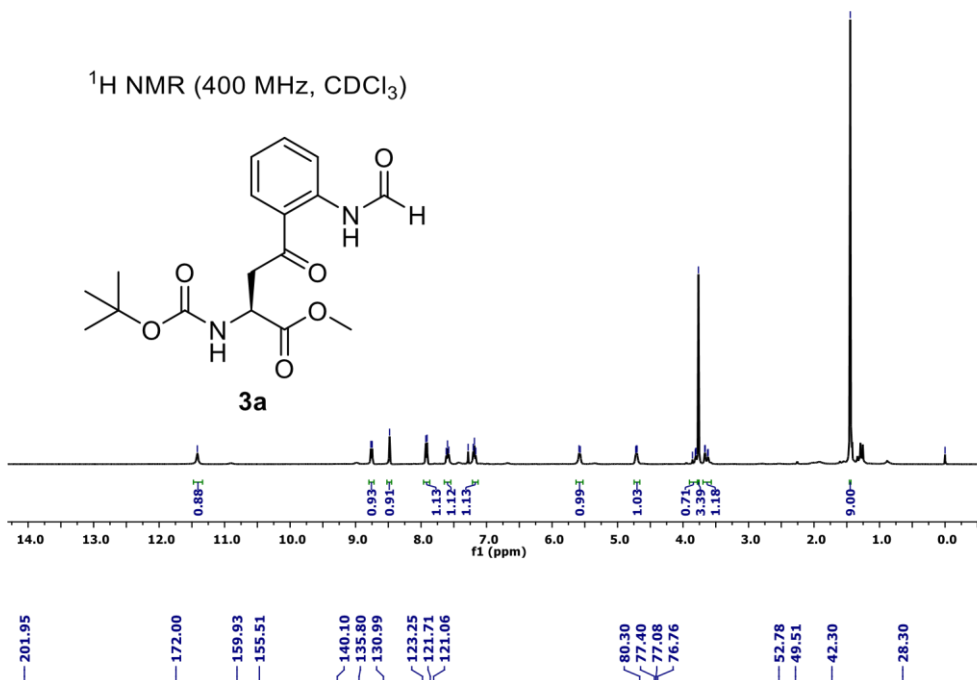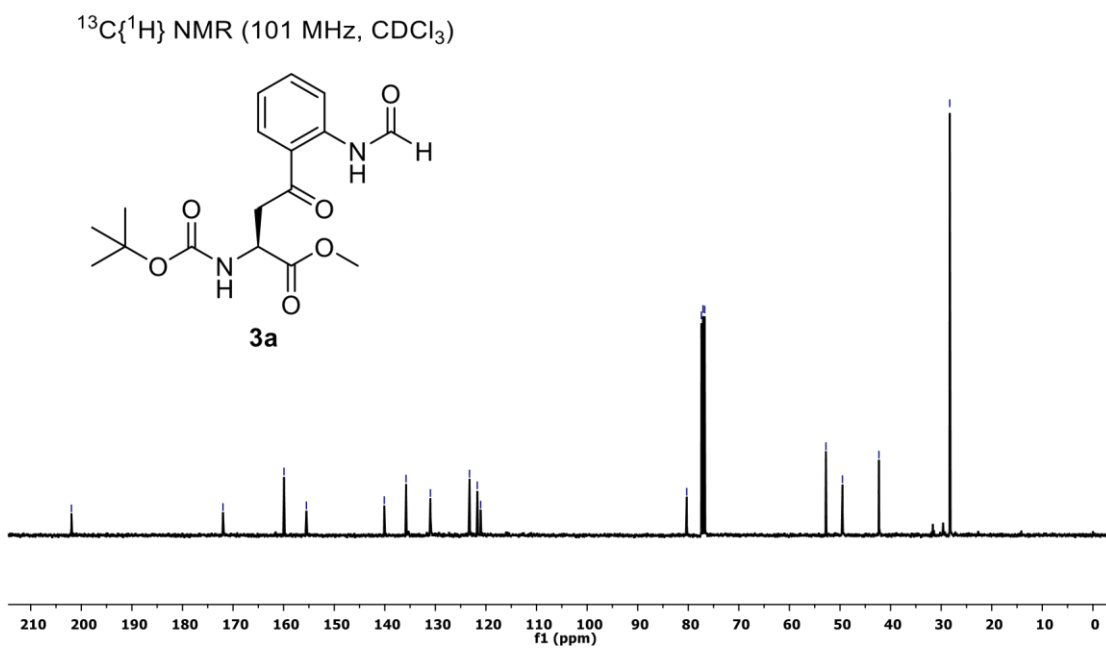

**Fig S69.** <sup>1</sup>H, <sup>13</sup>C {<sup>1</sup>H} NMR spectra of kynurenine derivative **3a**.

ARP\_52

09-Mar-2024  
16:16:16

XEVO-G2XSQTOF#NotSet

NKS\_09032024\_1 (0.053) Cu (0.05); Is (1.00,1.00) C<sub>17</sub>H<sub>22</sub>N<sub>2</sub>O<sub>6</sub>Na

1: TOF MS ES+  
8.13e12

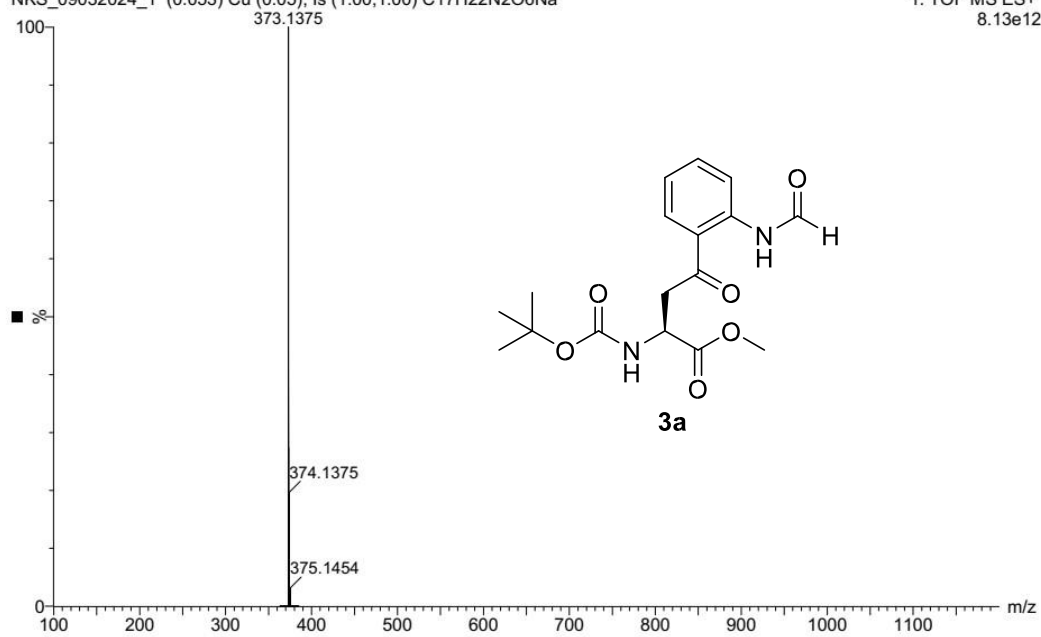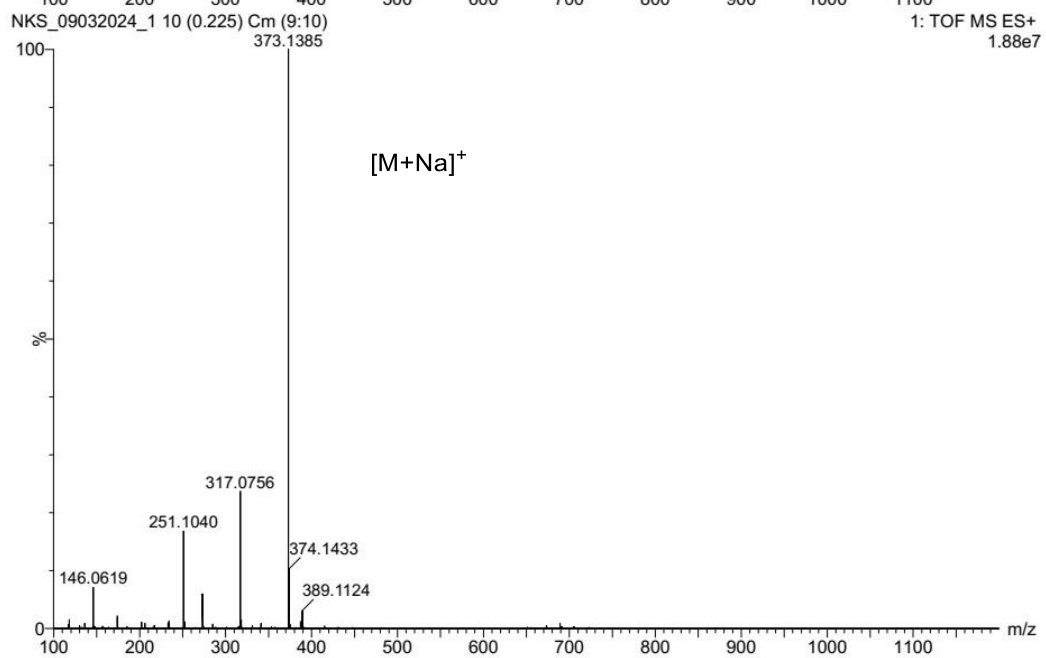

**Fig S70.** ESI-HRMS spectra of kynurenine derivative **3a**.

8.77  
8.75  
8.48  
7.94  
7.92  
7.62  
7.60  
7.58  
7.27  
7.21  
7.19  
7.17

5.55  
5.53

4.68  
4.67  
4.66  
4.25  
4.23  
4.21  
4.20  
3.80  
3.79  
3.76  
3.75  
3.66  
3.65  
3.35  
1.27  
1.25  
1.24

-0.00  
-11.42

$^1\text{H}$  NMR (400 MHz,  $\text{CDCl}_3$ )

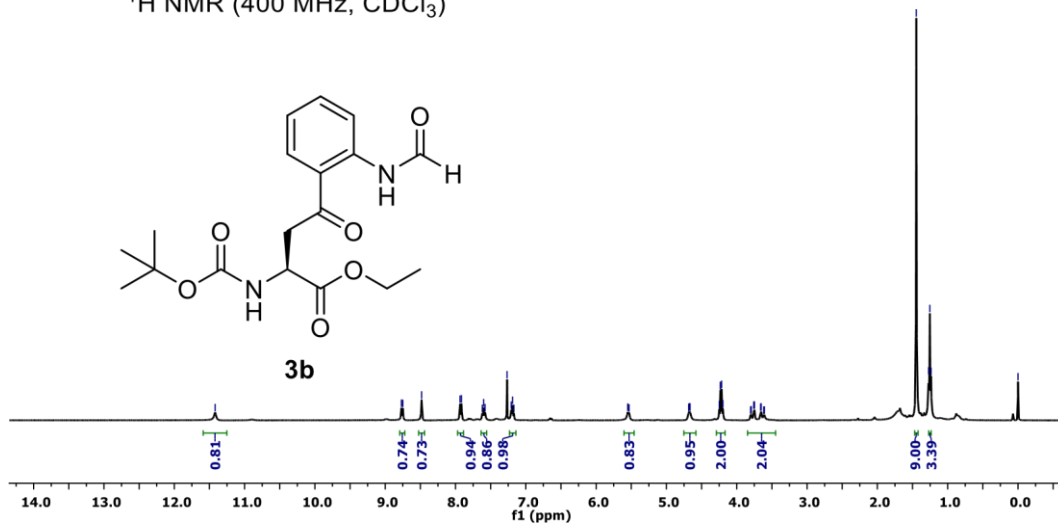

Fig  $^1\text{H}$ ,  $^{13}\text{C}$  { $^1\text{H}$ } of

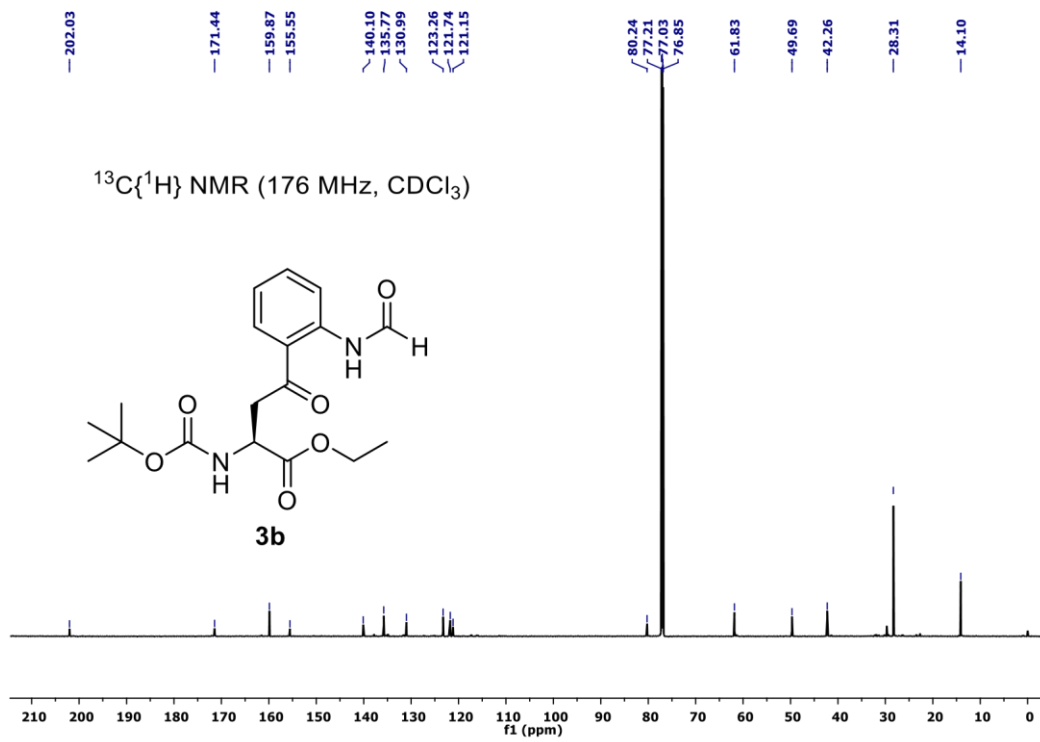

S71.  $^{13}\text{C}\{^1\text{H}\}$  NMR spectra kynurenine derivative **3b**.

NKS\_CKJ\_40C\_P

01-Jul-2024  
16:26:59

XEVO-G2XSQTOF#NotSet

NKS\_01072024\_1 (0.053) Cu (0.05); ls (1.00,1.00) C<sub>18</sub>H<sub>24</sub>N<sub>2</sub>O<sub>6</sub>Na

1: TOF MS ES+  
8.04e12

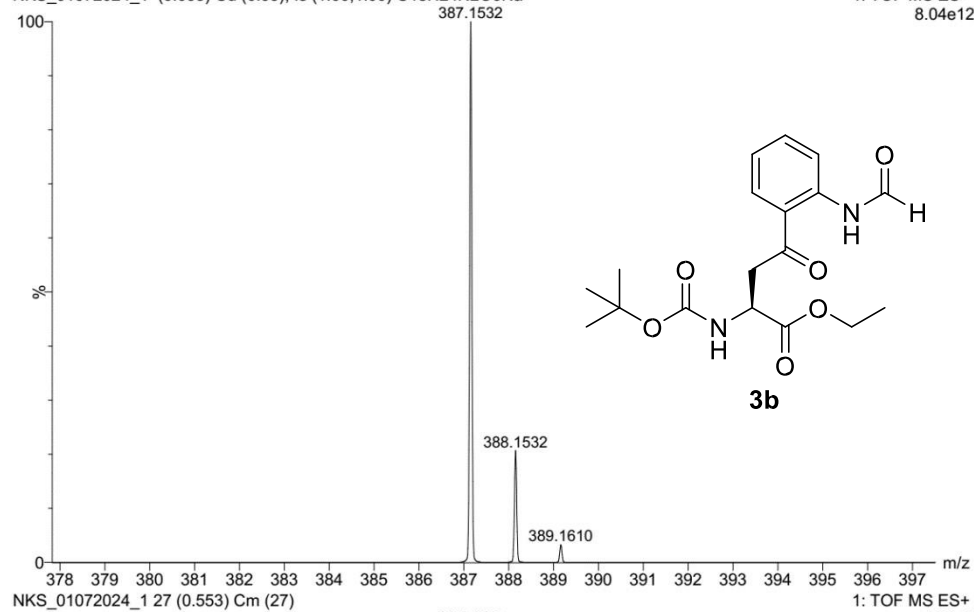

NKS\_01072024\_1 27 (0.553) Cm (27)

1: TOF MS ES+  
1.93e6

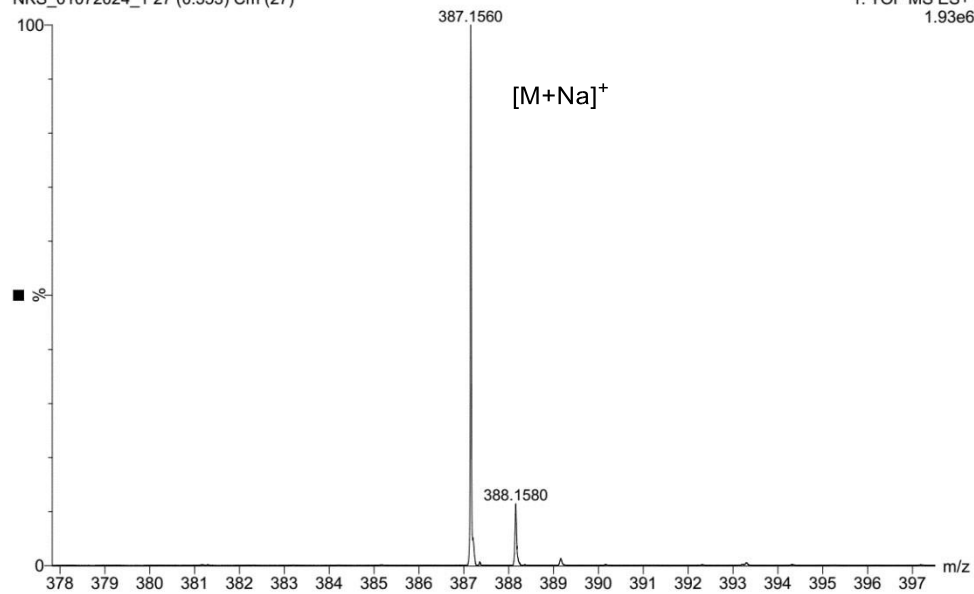

Fig  $^1\text{H}$ ,  $^{13}\text{C}$  { $^1$ } of



Fig S72. ESI-HRMS spectra of kynurenine derivative **3b**.

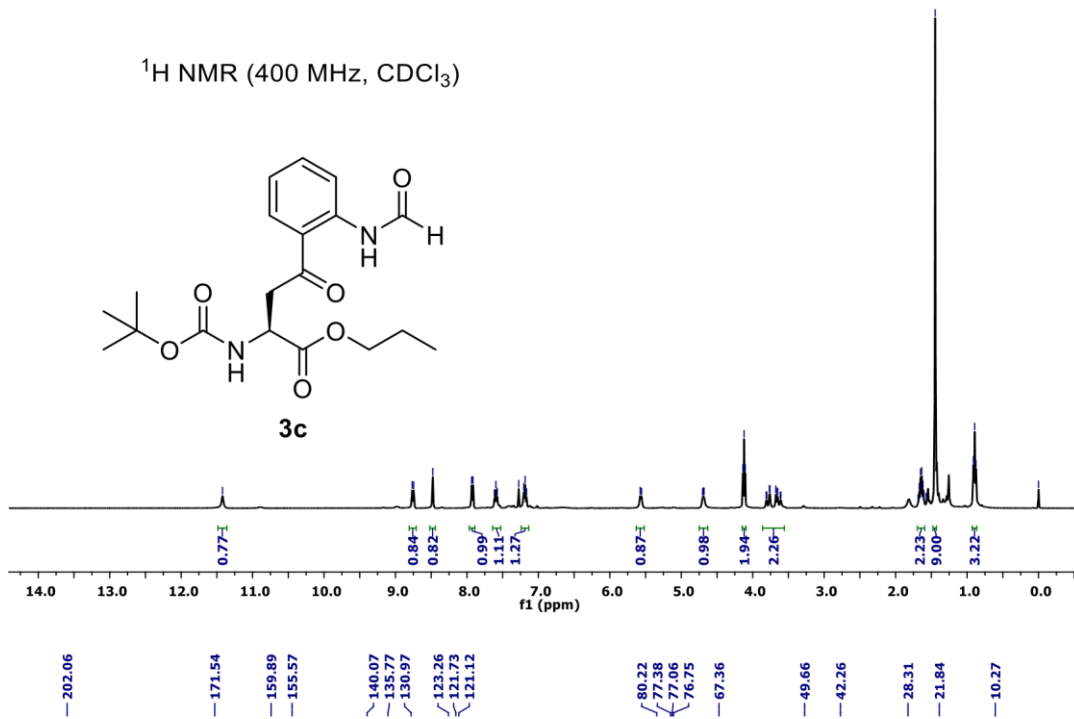

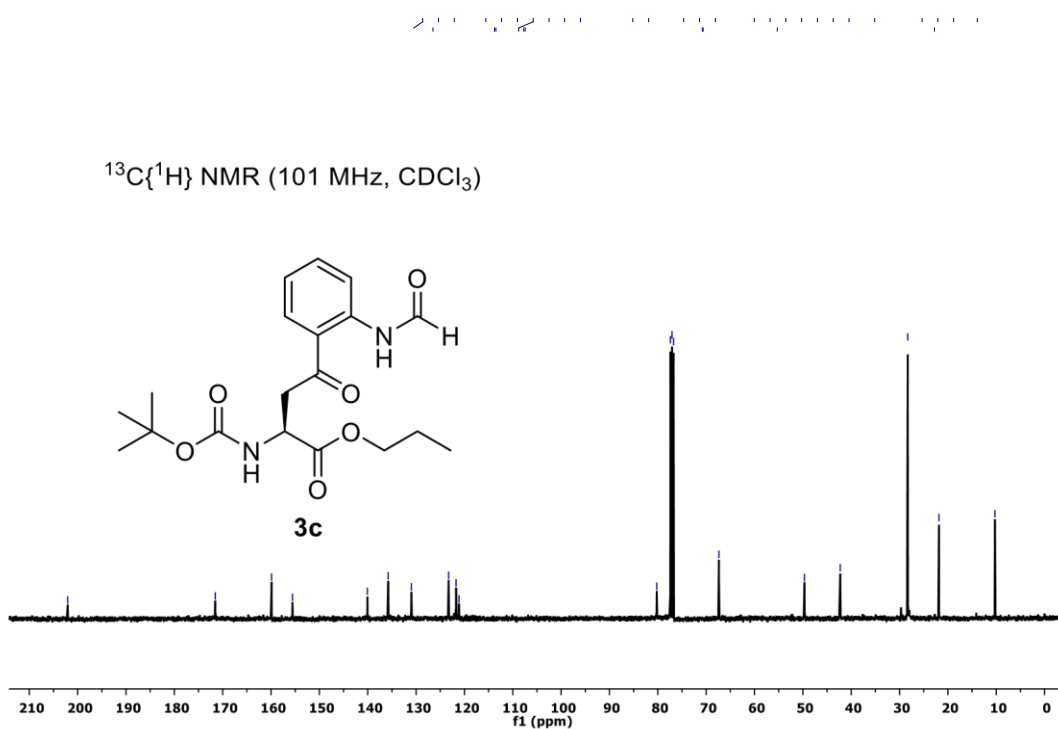

**S73.**  $^{13}\text{C}\{^1\text{H}\}$  NMR spectra kynurenine derivative **3c**.

**Fig**  $^1\text{H}, ^{13}\text{C}\{^1\text{H}\}$  NMR spectra of

ARP\_55

09-Mar-2024  
16:43:49

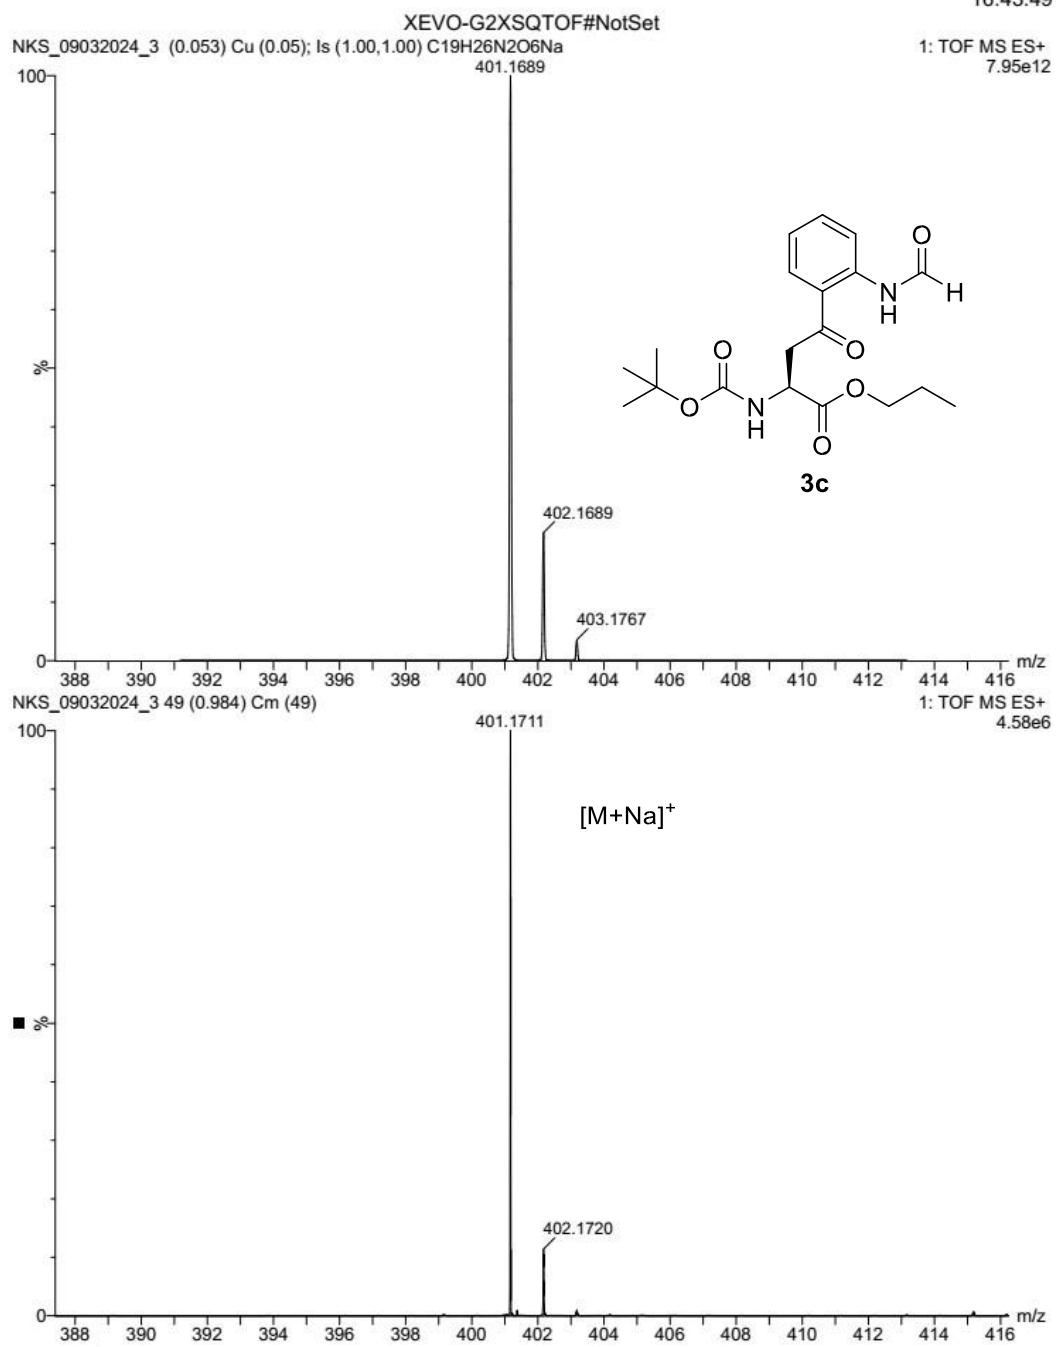

Fig S74. ESI-HRMS spectra of kynurenine derivative **3c**.

.....

**Fig**  $^1\text{H}, ^{13}\text{C}$  {<sup>1</sup> of

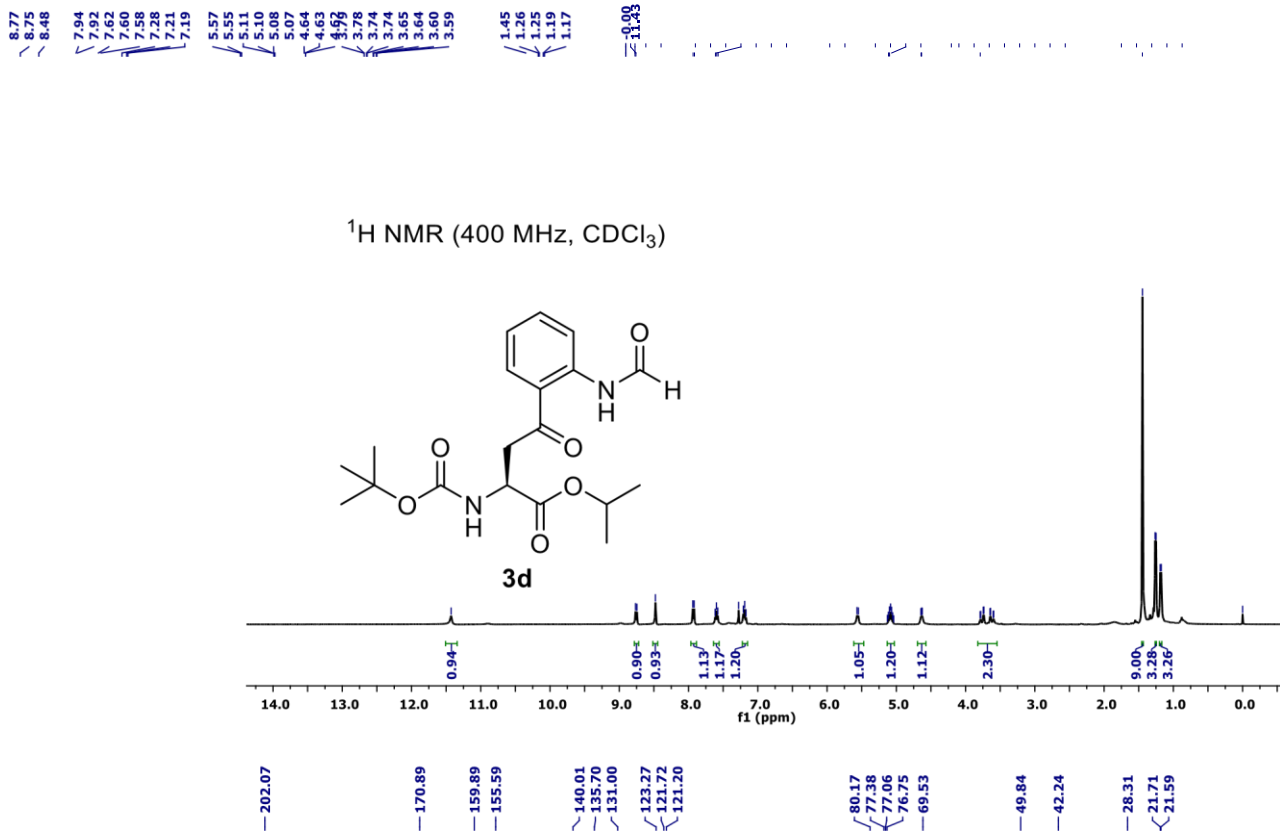

Fig <sup>1</sup>H, <sup>13</sup>C {<sup>1</sup>H} of

$^{13}\text{C}\{^1\text{H}\}$  NMR (101 MHz,  $\text{CDCl}_3$ )

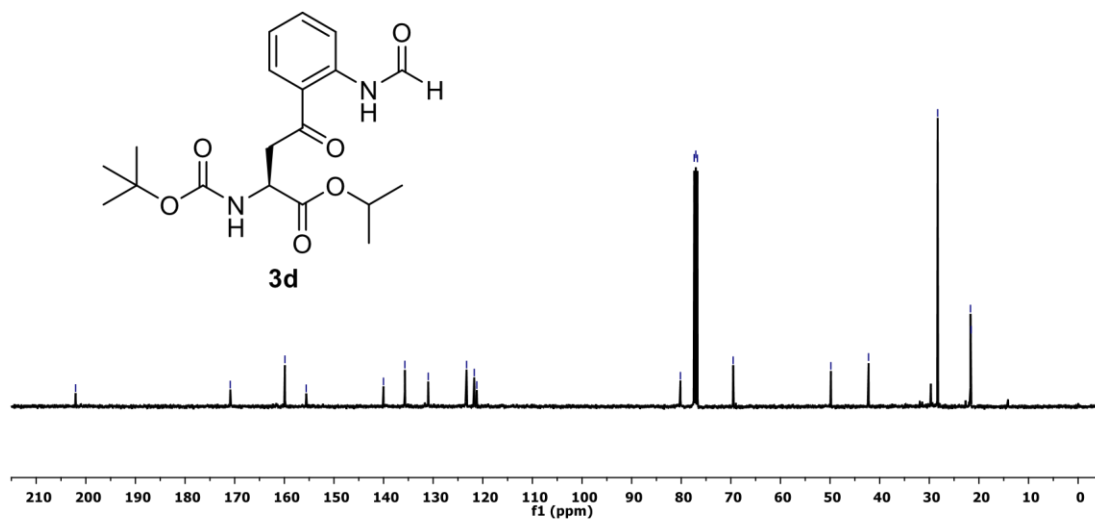

**S75.**  $^1\text{H}$  NMR spectra kynurenine derivative **3d**.

NKS\_ARP\_57

10-May-2024  
01:03:22

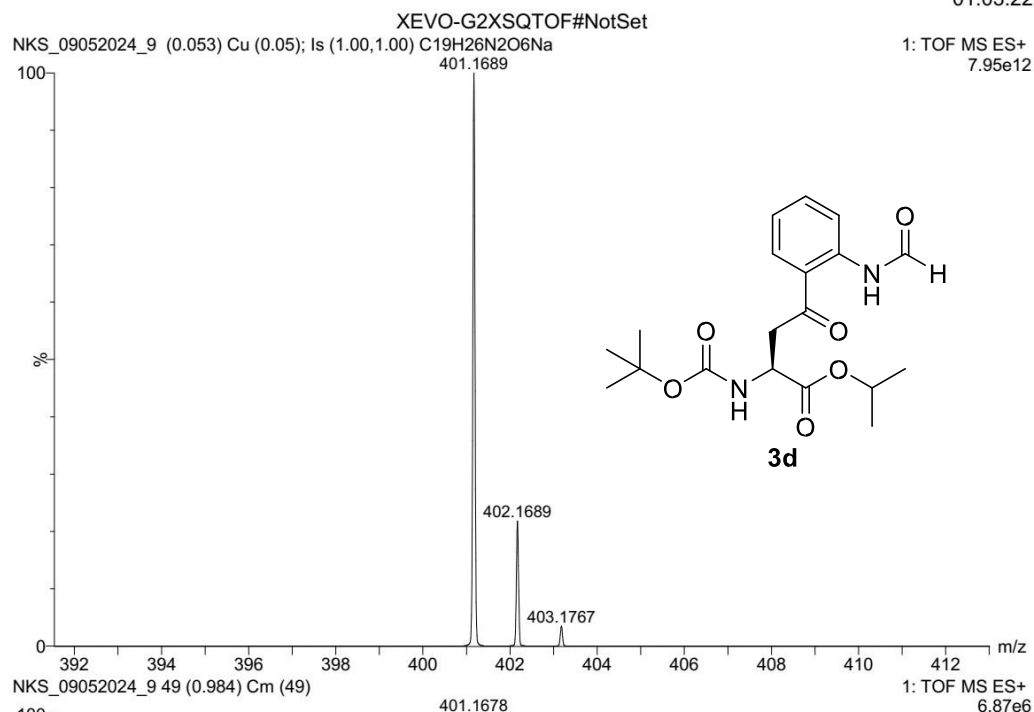

**Fig S76.** ESI-HRMS spectra of kynurenine derivative **3d**.

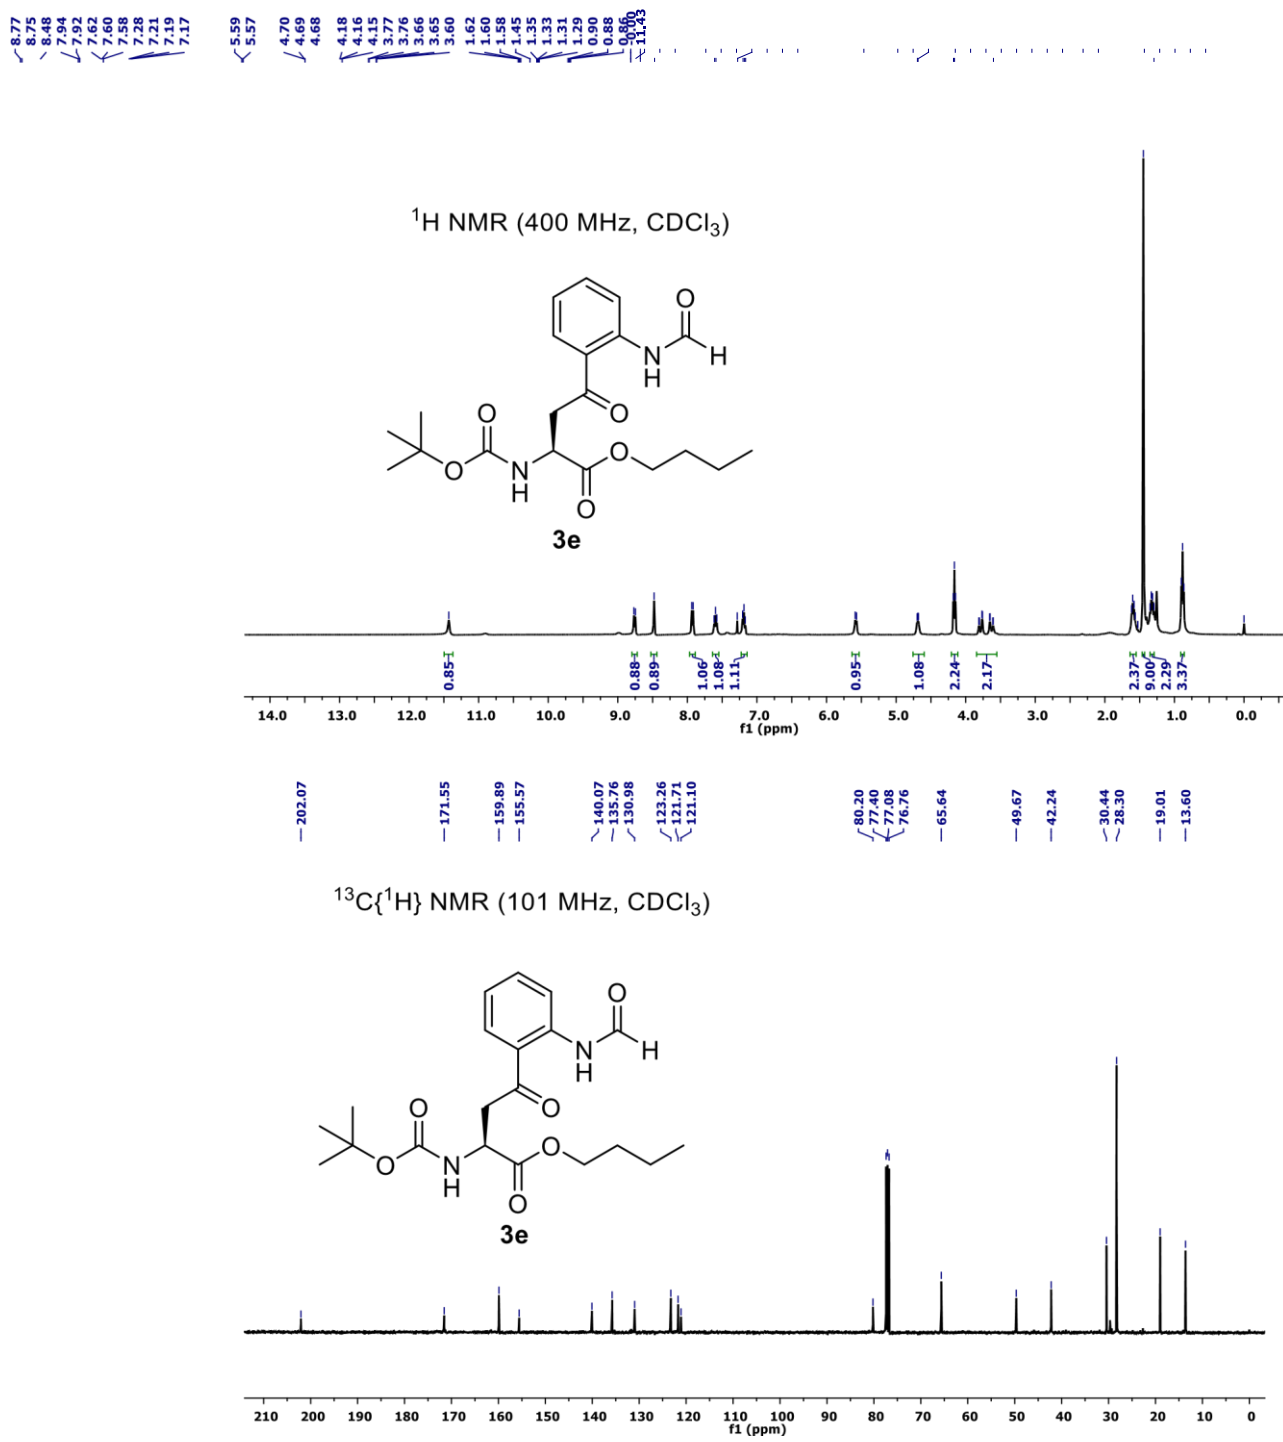

**Fig S77.** <sup>1</sup>H, <sup>13</sup>C {<sup>1</sup>H} NMR spectra of kynurenine derivative **3e**.



ARP\_56

09-Mar-2024  
20:27:06

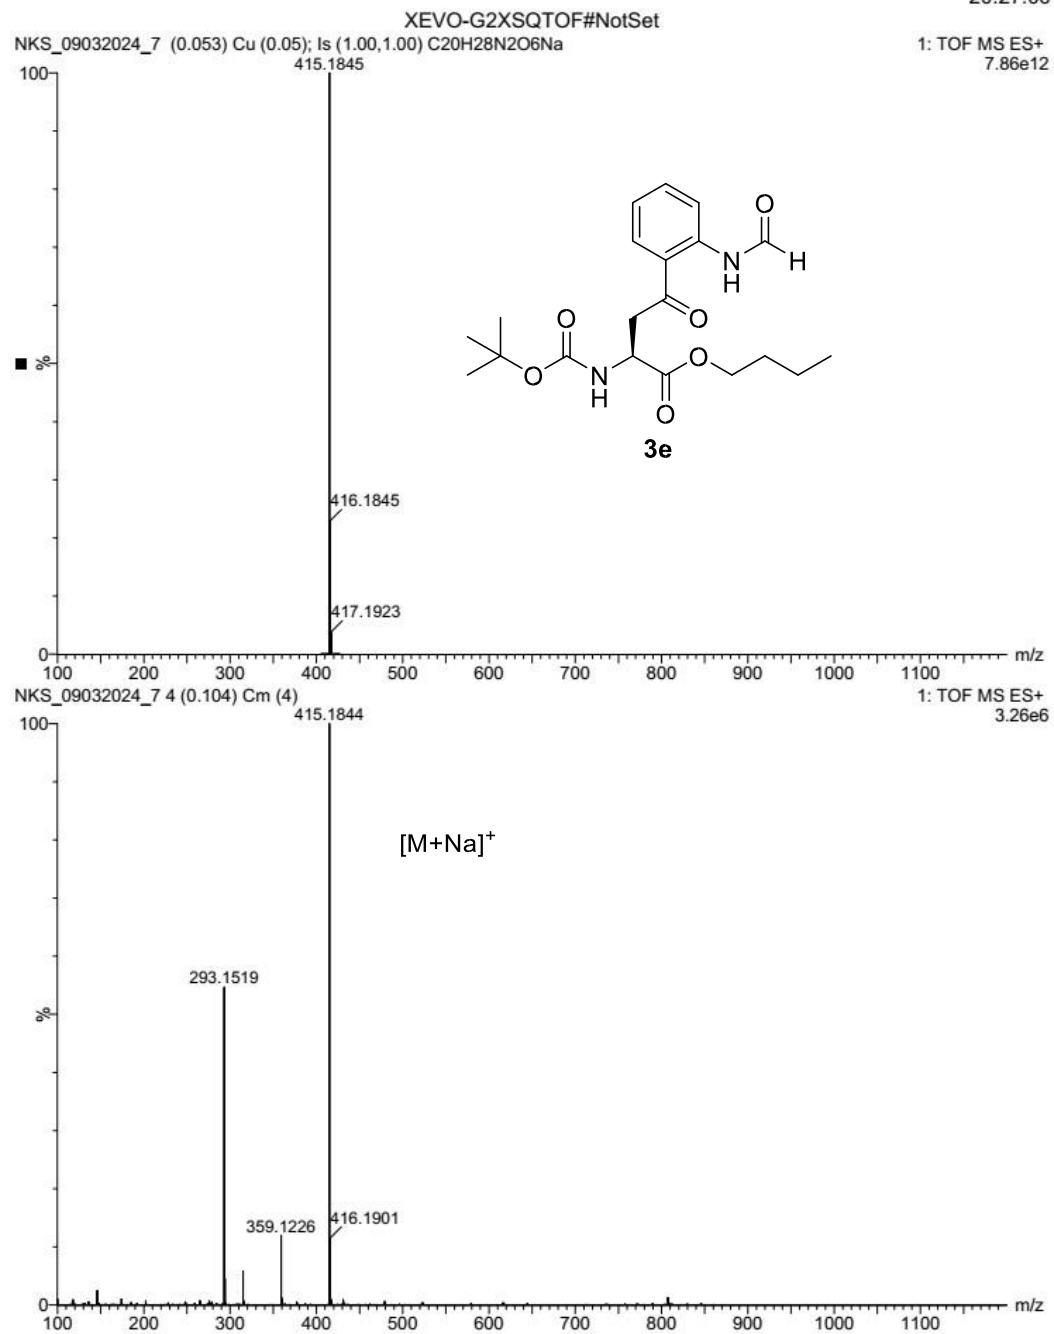

**Fig S78.** ESI-HRMS spectra of kynurenine derivative **3e**.

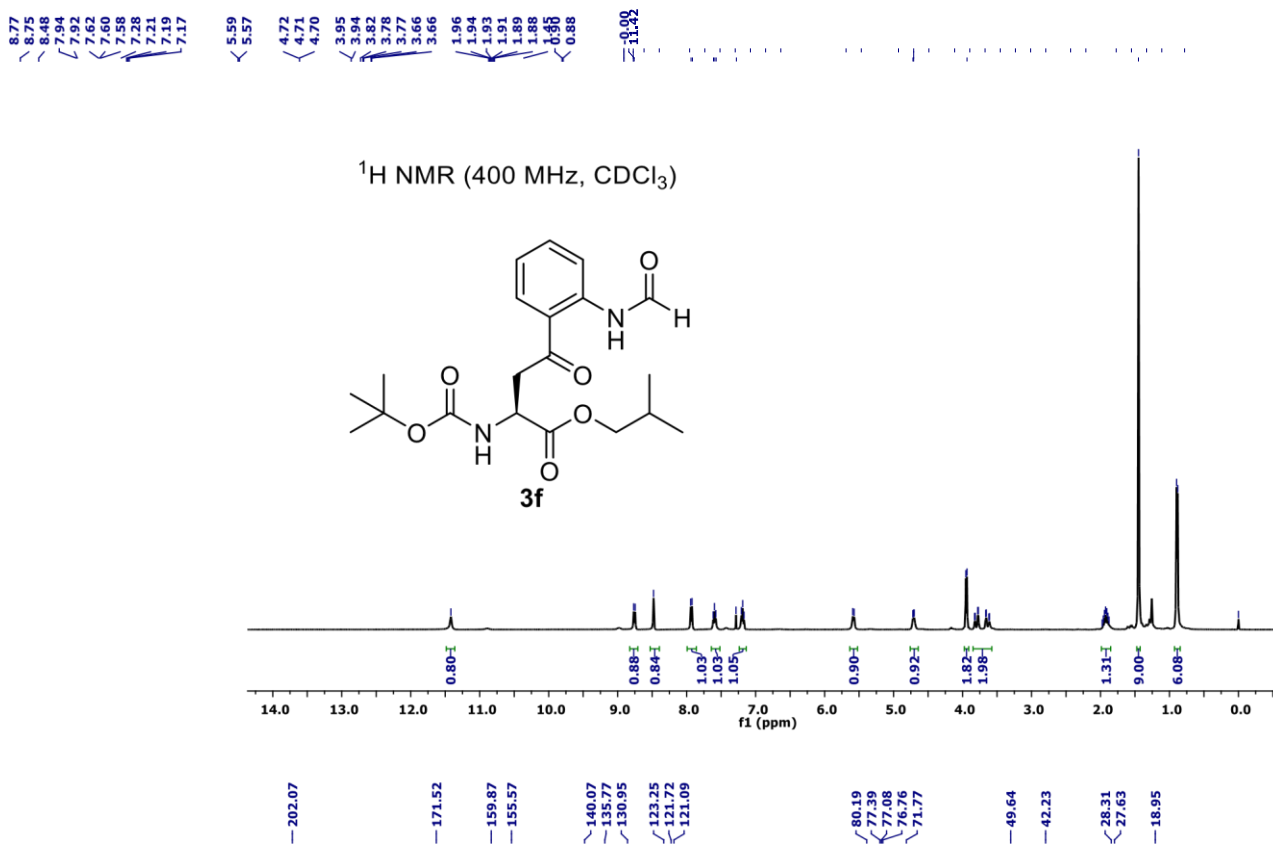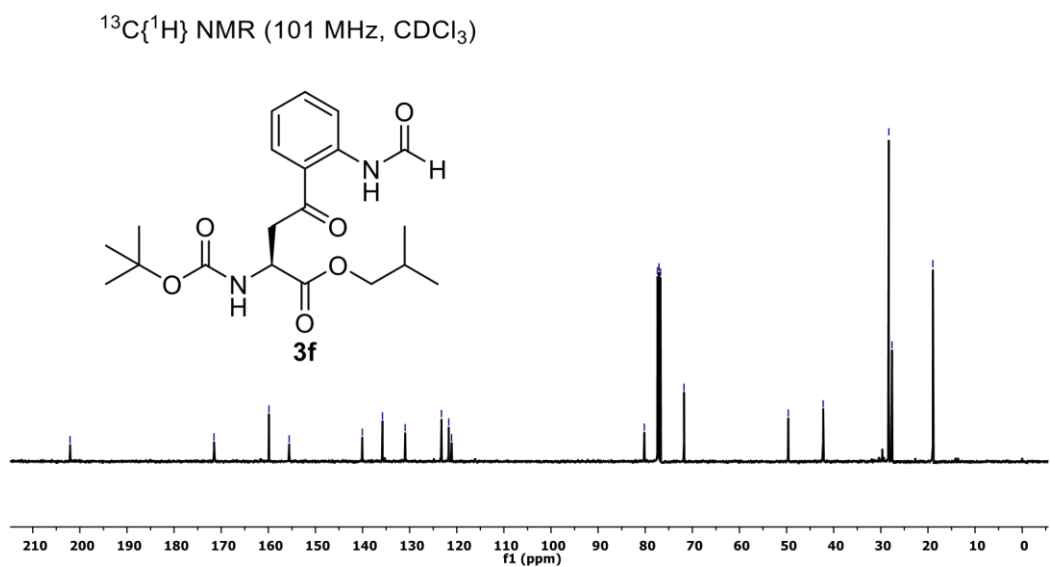

**Fig S79.** <sup>1</sup>H, <sup>13</sup>C {<sup>1</sup>H} NMR spectra of kynurenine derivative **3f**.

NKS\_ARP-76

15-Apr-2024  
23:15:31

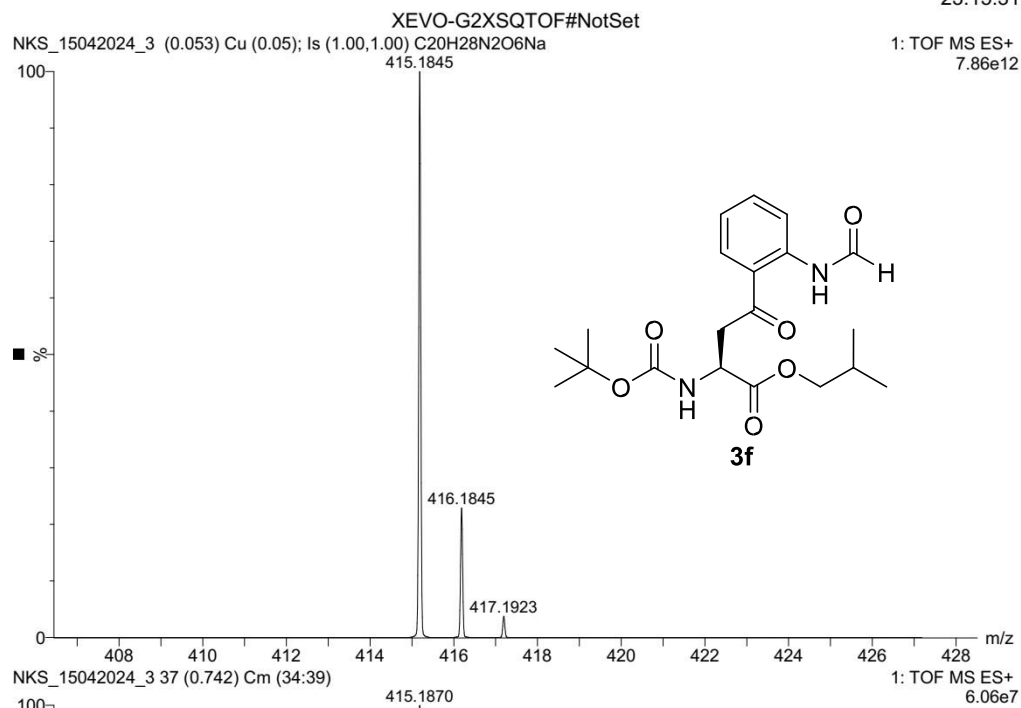

**Fig S80.** ESI-HRMS spectra of kynurenine derivative **3f**.

8.77  
8.75  
8.48  
7.94  
7.92  
7.61  
7.60  
7.58  
7.28  
7.20  
7.19  
7.17

5.58  
5.56  
4.70  
4.69  
4.68

4.17  
4.16  
4.15  
4.14  
4.13  
3.81  
3.77  
3.76  
3.66  
3.55  
3.54  
1.26  
1.24  
1.20  
0.87  
0.86  
0.84

0.00  
-11.33

7

<sup>1</sup>H NMR (400 MHz, CDCl<sub>3</sub>)

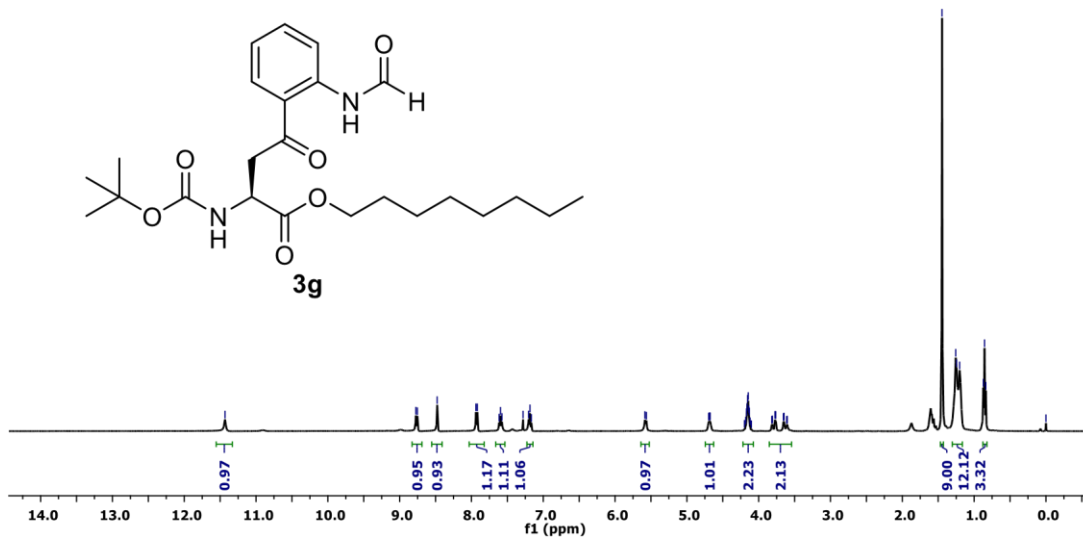

202.06  
171.52  
159.84  
155.55  
140.11  
135.76  
130.96  
123.23  
121.70  
121.07  
80.18  
77.39  
77.07  
76.75  
65.93  
49.65  
42.27  
31.71  
28.13  
28.04  
28.30  
25.85  
22.00  
14.06

<sup>13</sup>C{<sup>1</sup>H} NMR (101 MHz, CDCl<sub>3</sub>)

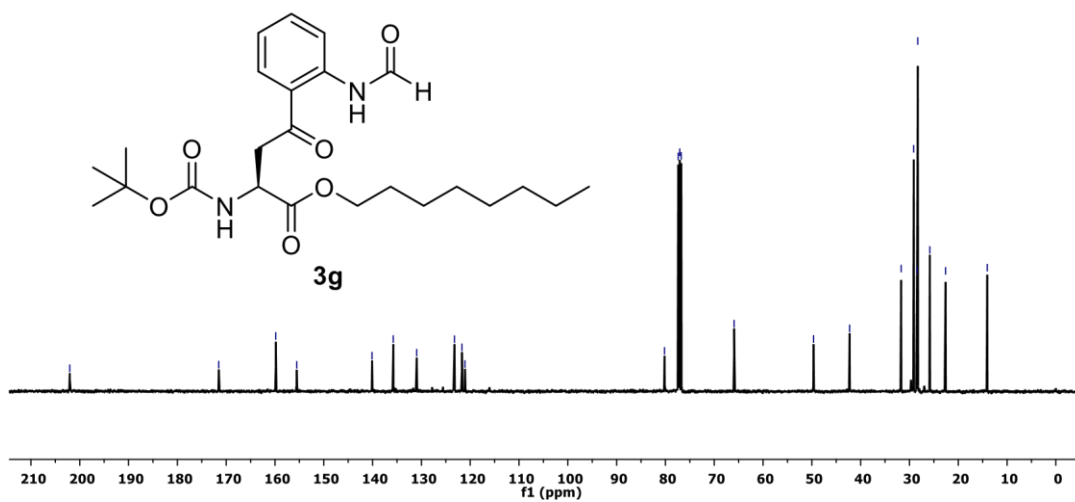

**Fig S81.**  $^1\text{H}$ ,  $^{13}\text{C}$   $\{^1\text{H}\}$  NMR spectra of kynurenine derivative **3g**.

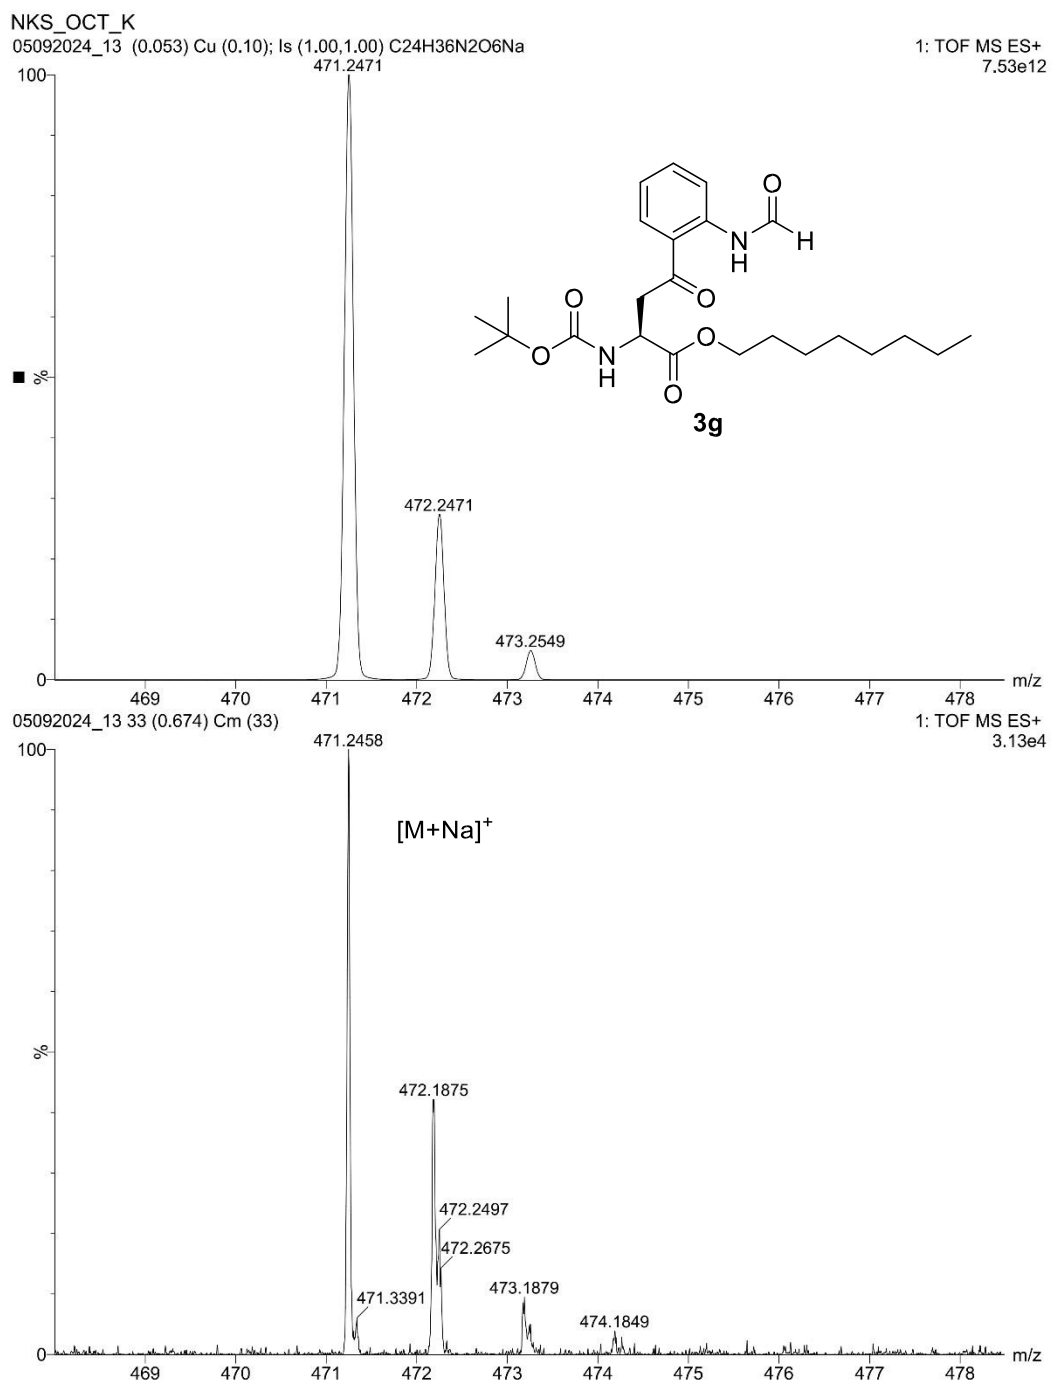

**Fig S82.** ESI-HRMS spectra of kynurenine derivative **3g**.

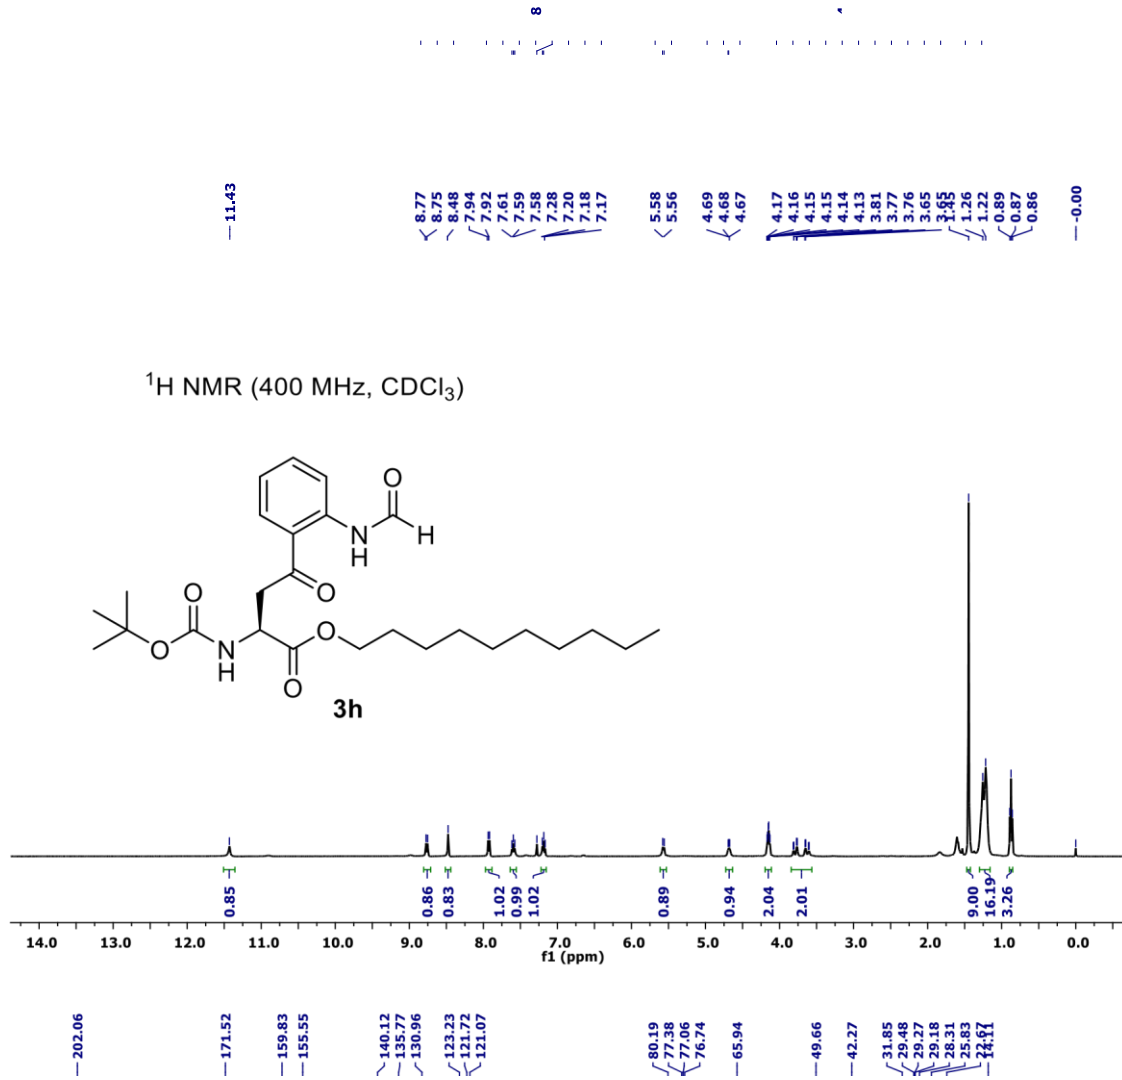

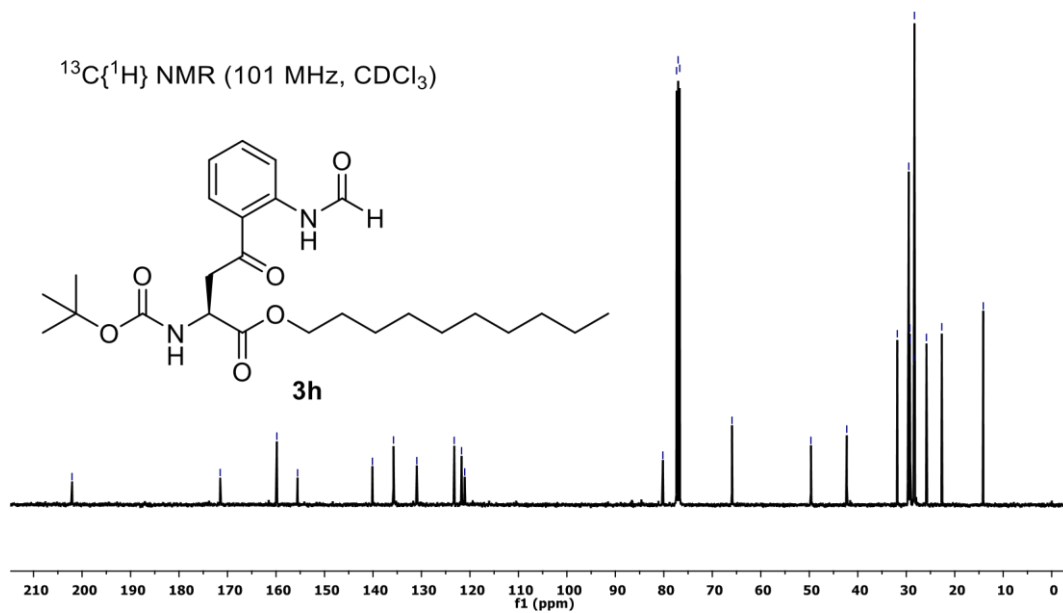

**Fig S83.**  $^1\text{H}$ ,  $^{13}\text{C}\{^1\text{H}\}$  NMR spectra of kynurenine derivative **3h**.

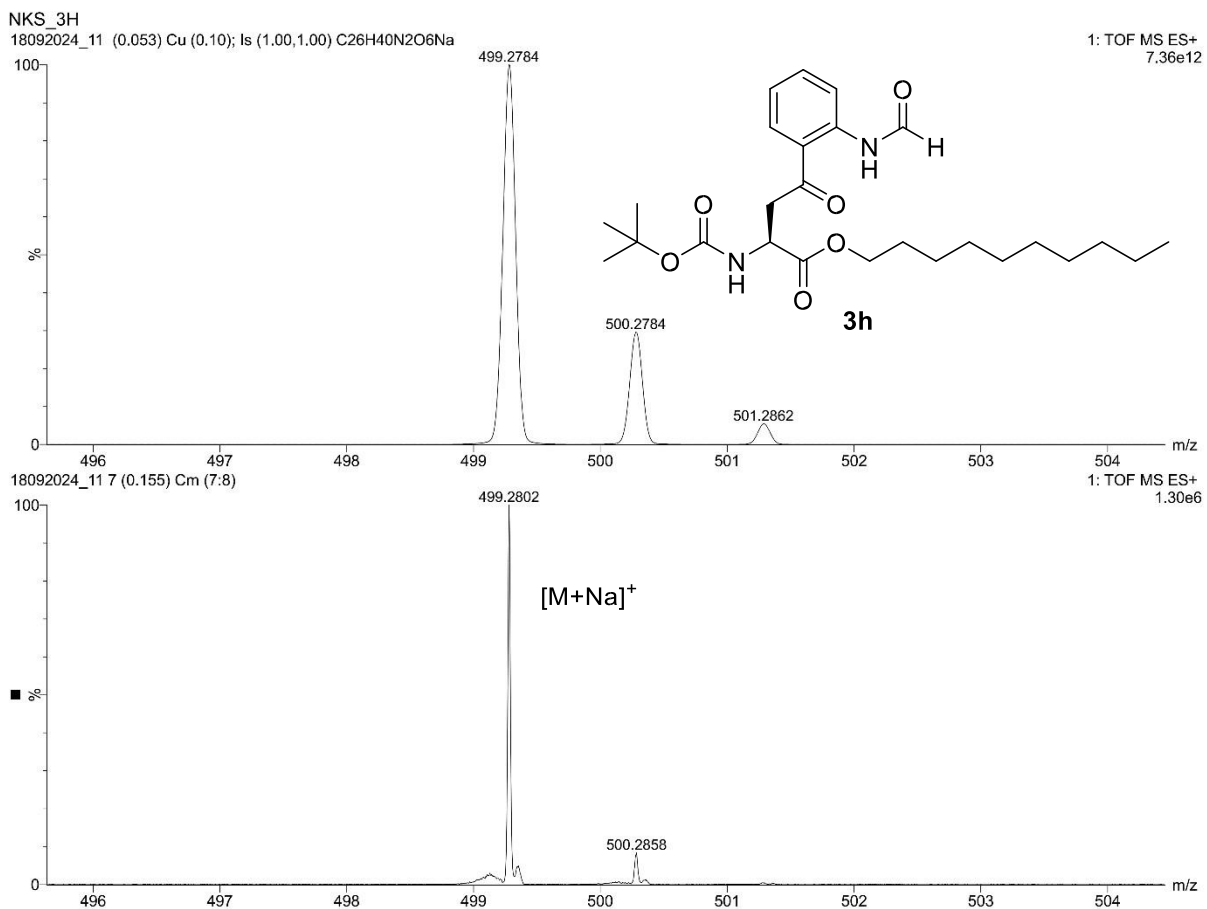

**Fig S84.** ESI-HRMS spectra of kynurenine derivative **3h**.

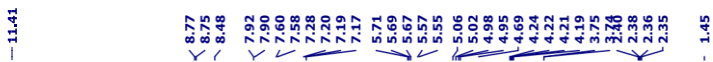



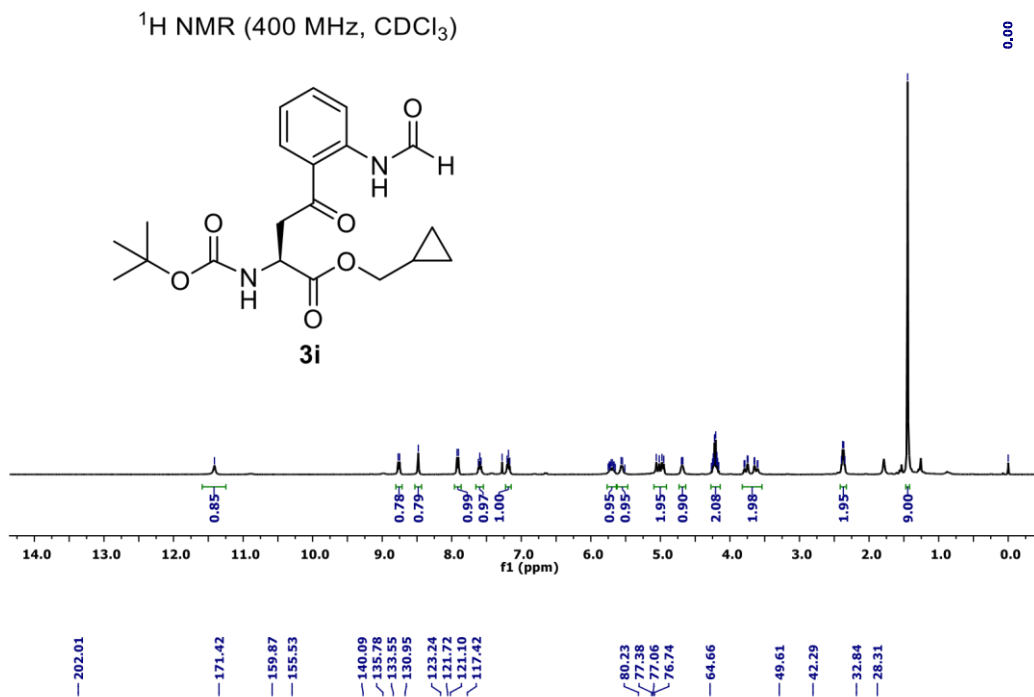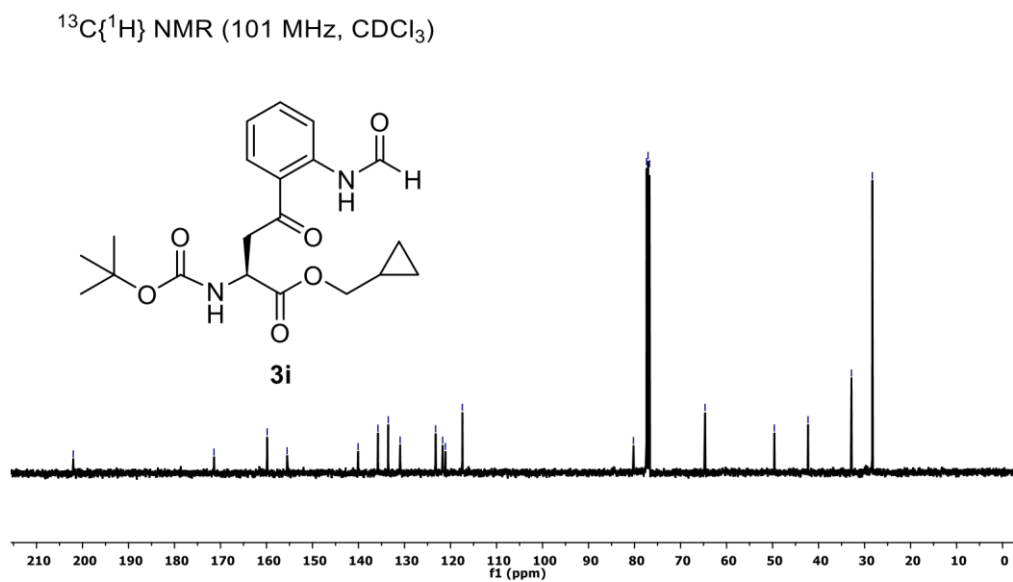

Fig S85. <sup>1</sup>H, <sup>13</sup>C {<sup>1</sup>H} NMR spectra of kynurenine derivative **3i**.

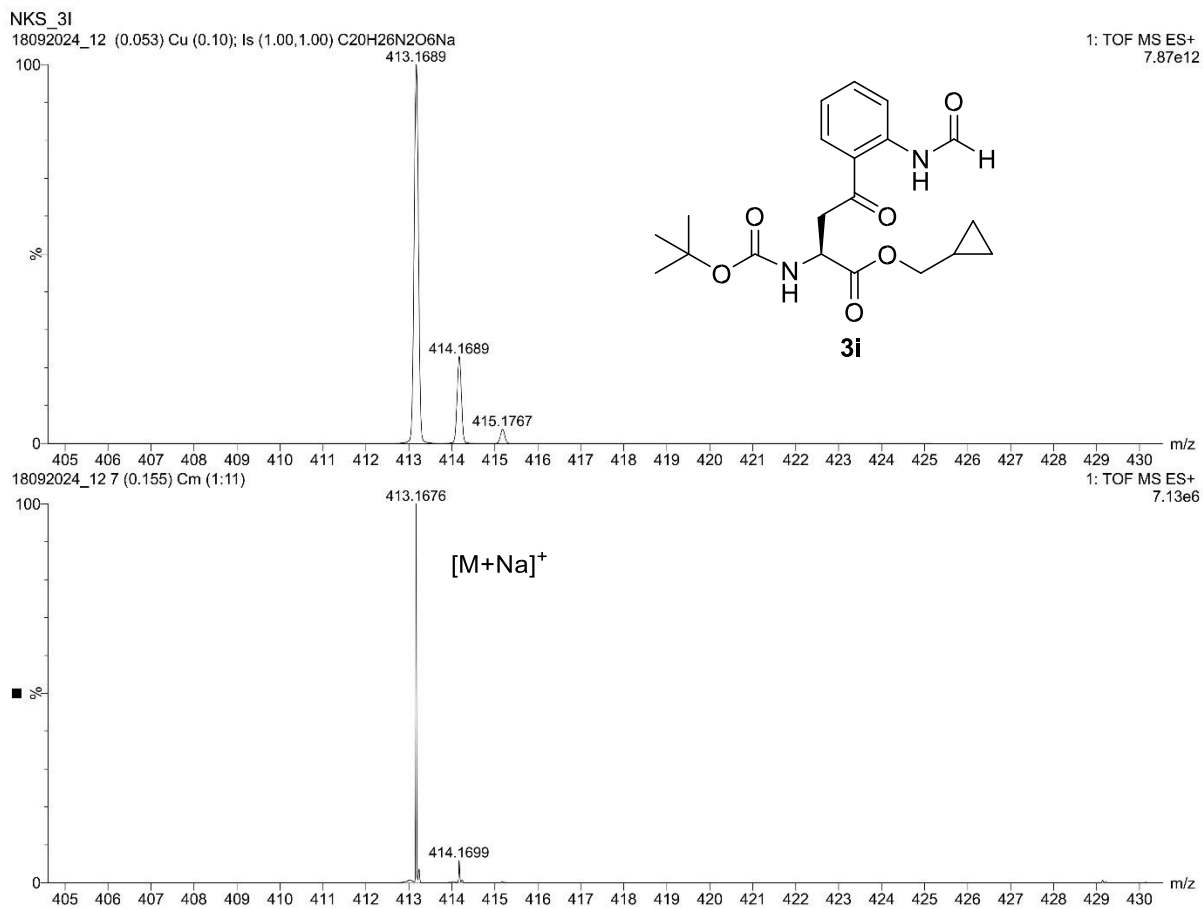

**Fig S86.** ESI-HRMS spectra of kynurenine derivative **3i**.

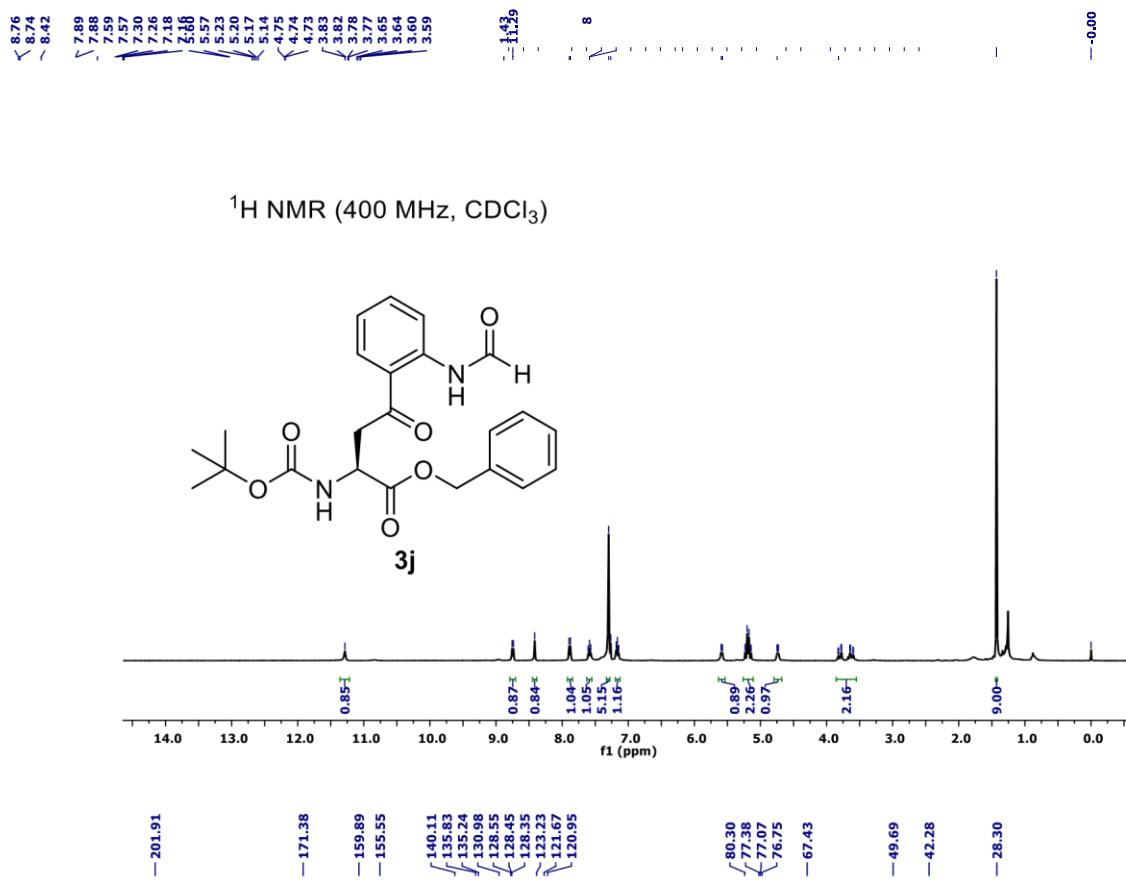

Fig S87. <sup>1</sup>H, <sup>13</sup>C {<sup>1</sup>H} NMR spectra of kynurenine derivative **3j**.

ARP\_60

09-Mar-2024  
20:47:55

XEVO-G2XSQTOF#NotSet

NKS\_09032024\_9 (0.053) Cu (0.05); Is (1.00,1.00) C23H26N2O6Na

1: TOF MS ES+  
7.62e12

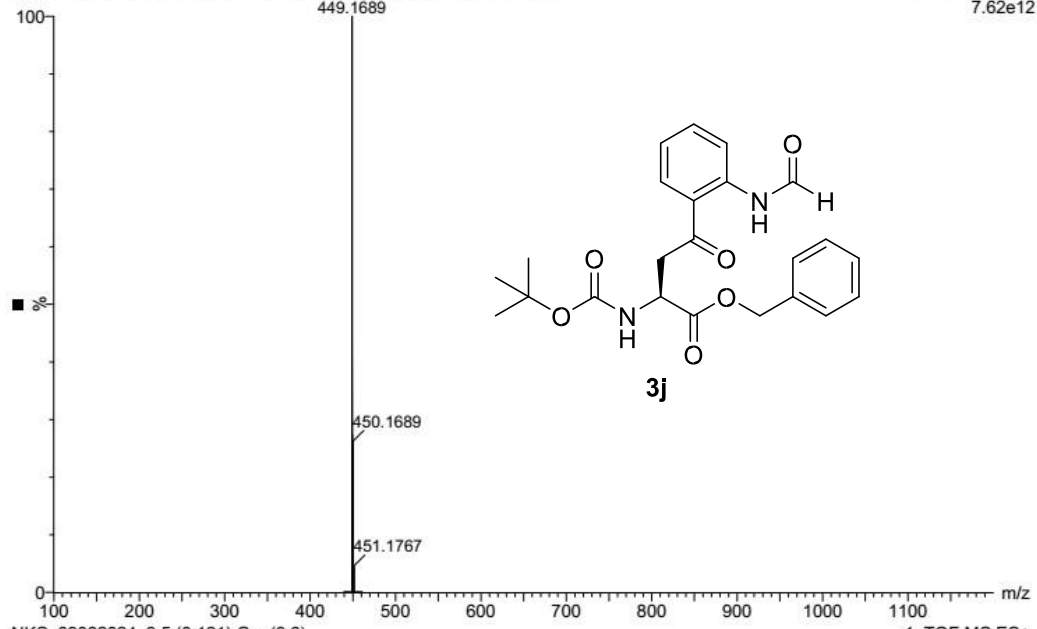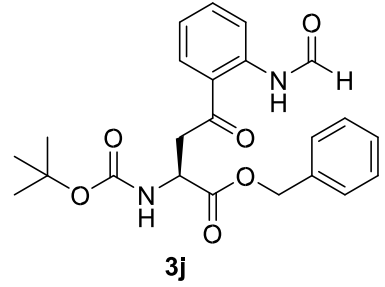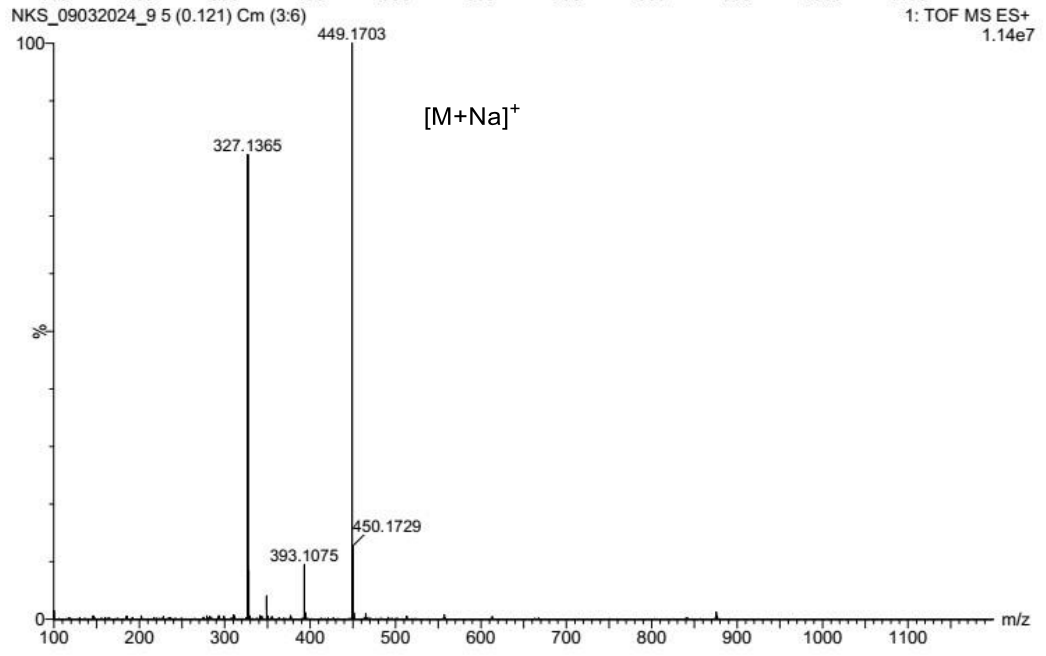

Fig S88. ESI-HRMS spectra of kynurenine derivative **3j**.

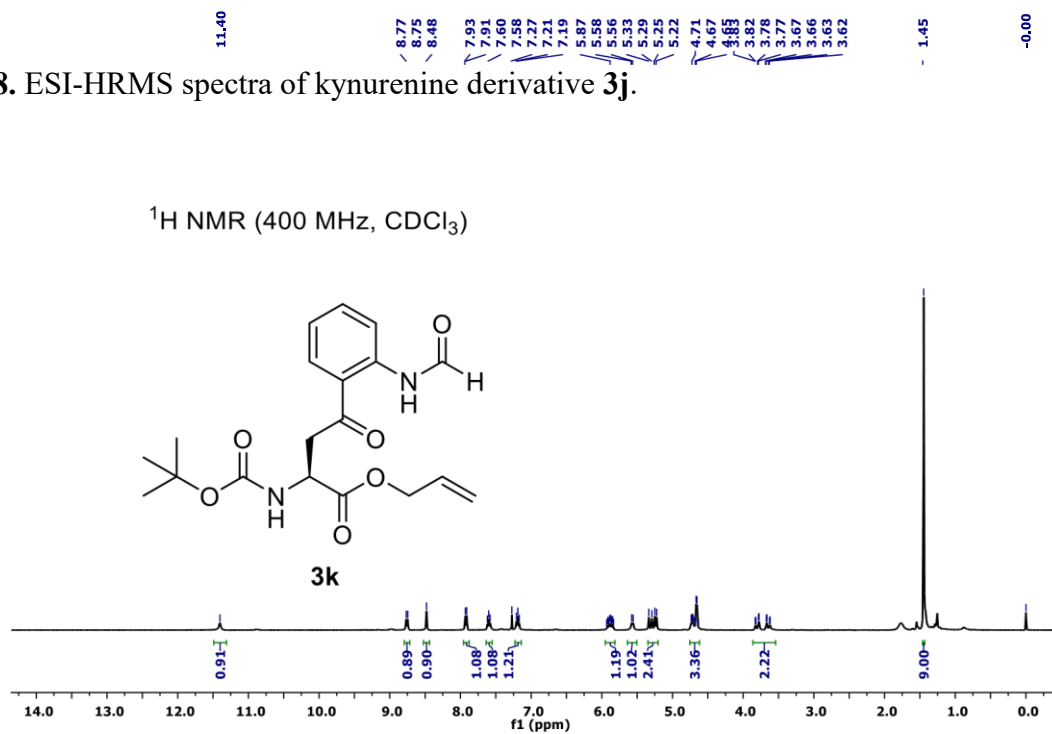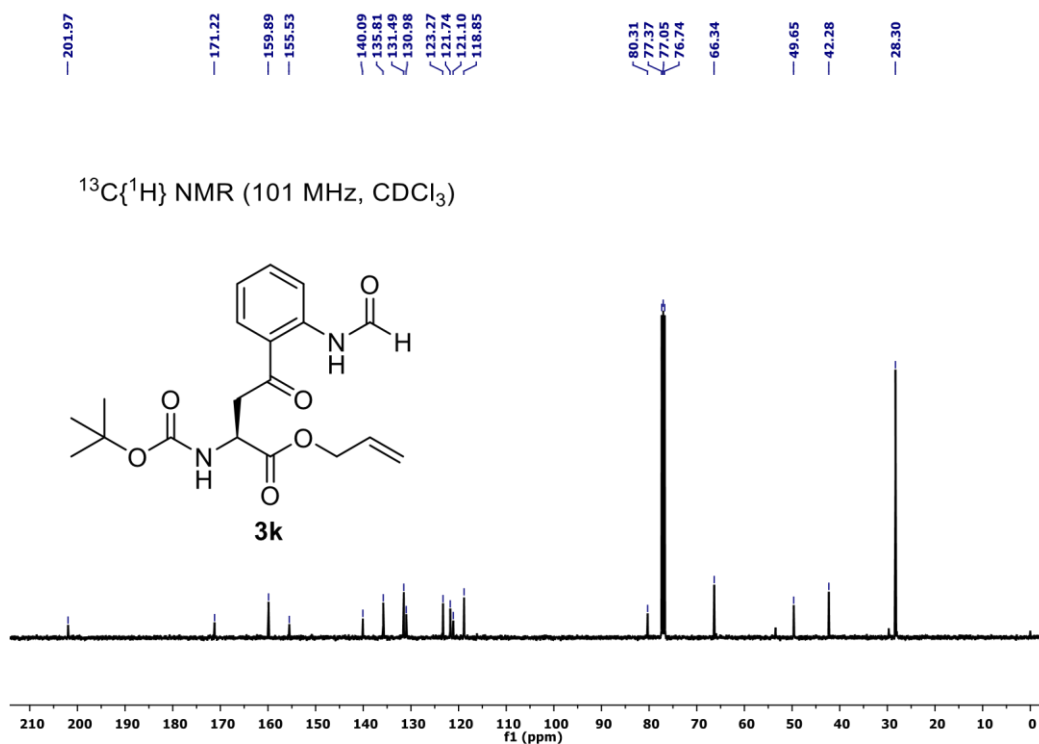

Fig S89. <sup>1</sup>H, <sup>13</sup>C {<sup>1</sup>H} NMR spectra of kynurenine derivative **3k**.

NKS\_ARP\_84

09-May-2024  
23:46:09

XEVO-G2XSQTOF#NotSet  
NKS\_09052024\_5 (0.053) Cu (0.05); Is (1.00,1.00) C<sub>19</sub>H<sub>24</sub>N<sub>2</sub>O<sub>6</sub>Na

1: TOF MS ES+  
7.95e12

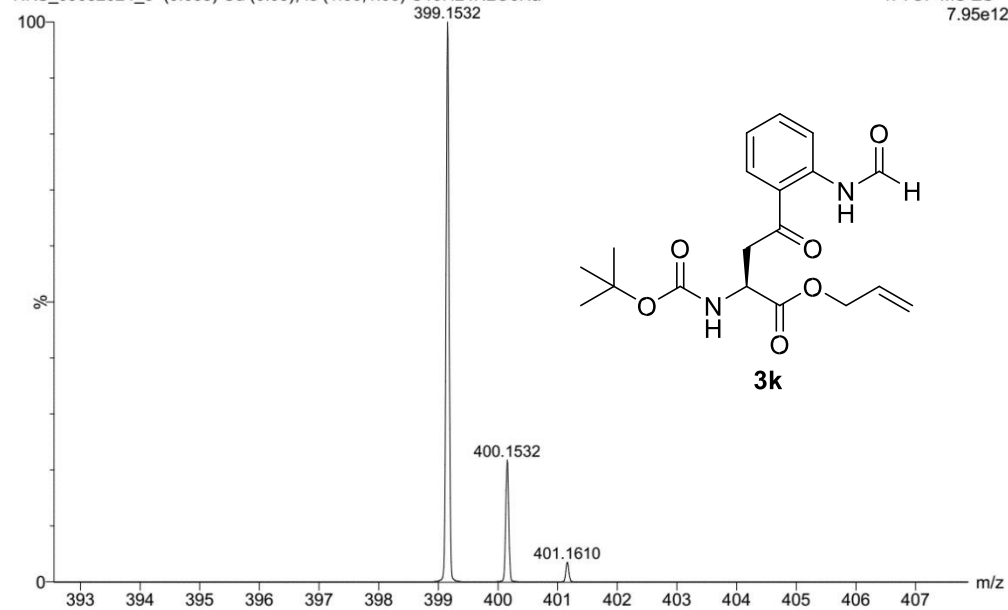

NKS\_09052024\_5\_45 (0.897) Cm (43:45)

1: TOF MS ES+  
1.49e7

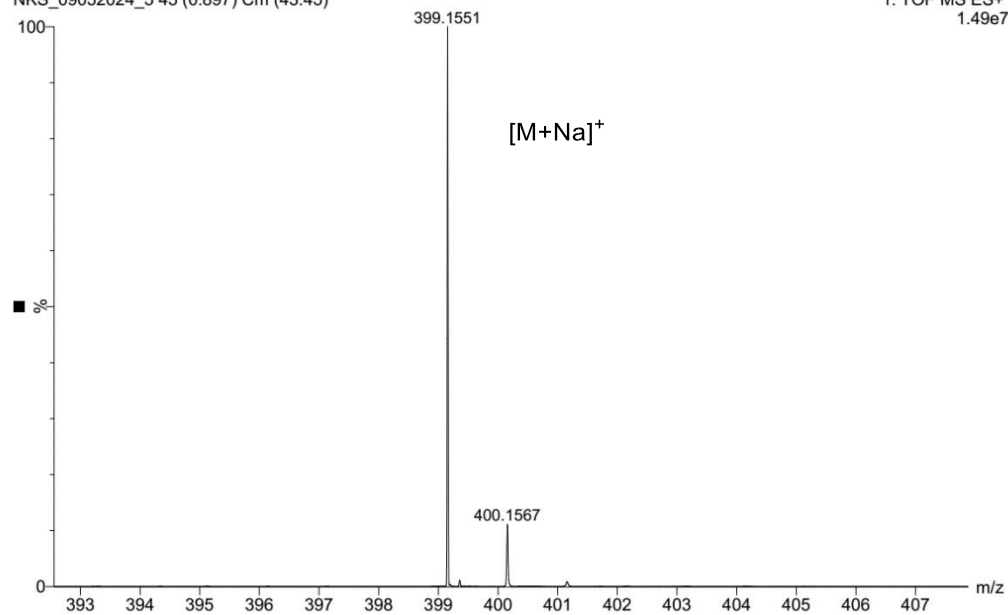

**Fig S90.** ESI-HRMS spectra of kynurenine derivative **3k**.



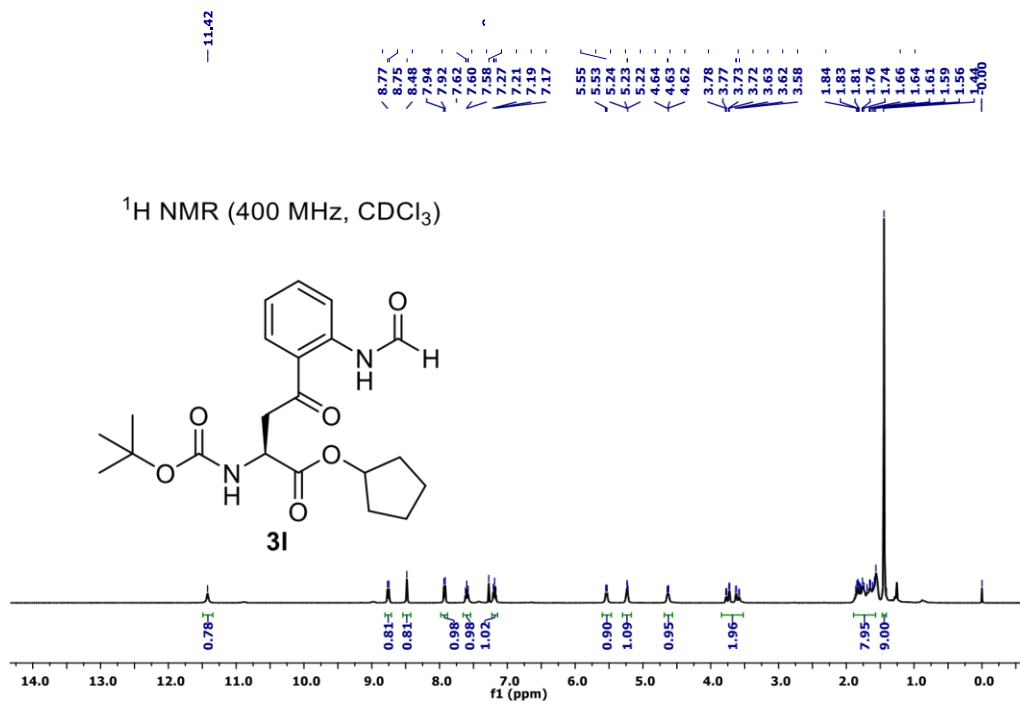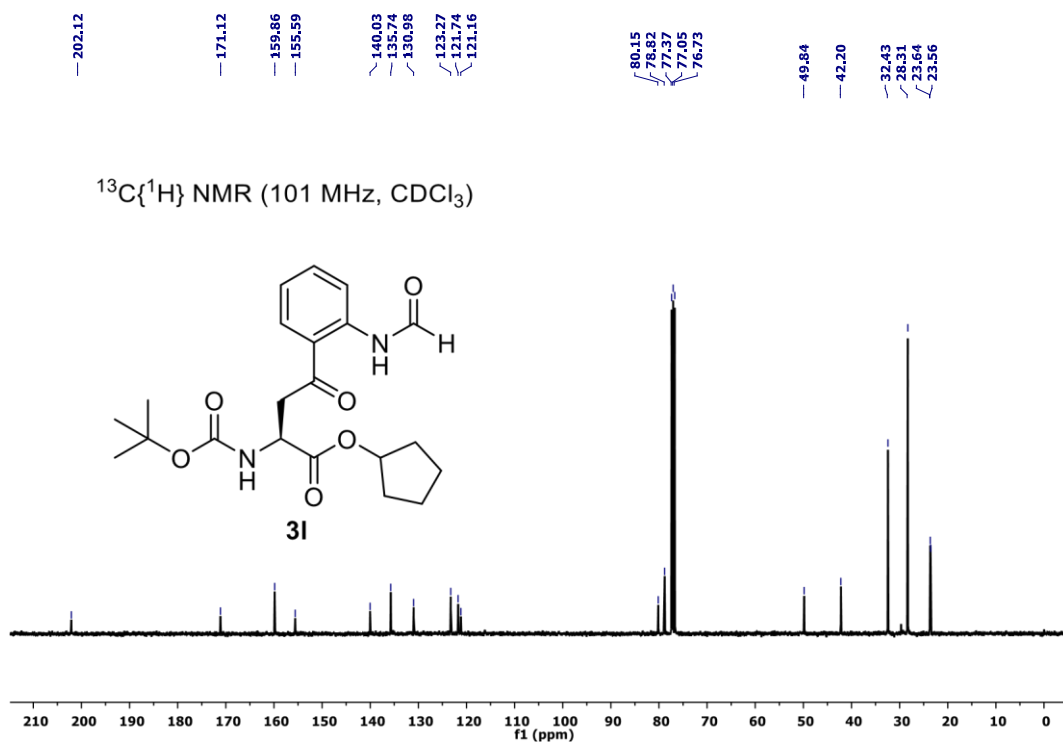

Fig S91. <sup>1</sup>H, <sup>13</sup>C {<sup>1</sup>H} NMR spectra of kynurenine derivative **3I**.



NKS\_CKJ\_1437 P

17-May-2024  
21:44:29

XEVO-G2XSQTOF#NotSet  
NKS\_17052024\_1 (0.053) Cu (0.05); Is (1.00,1.00) C<sub>21</sub>H<sub>28</sub>N<sub>2</sub>O<sub>6</sub>Na

1: TOF MS ES+  
7.78e12

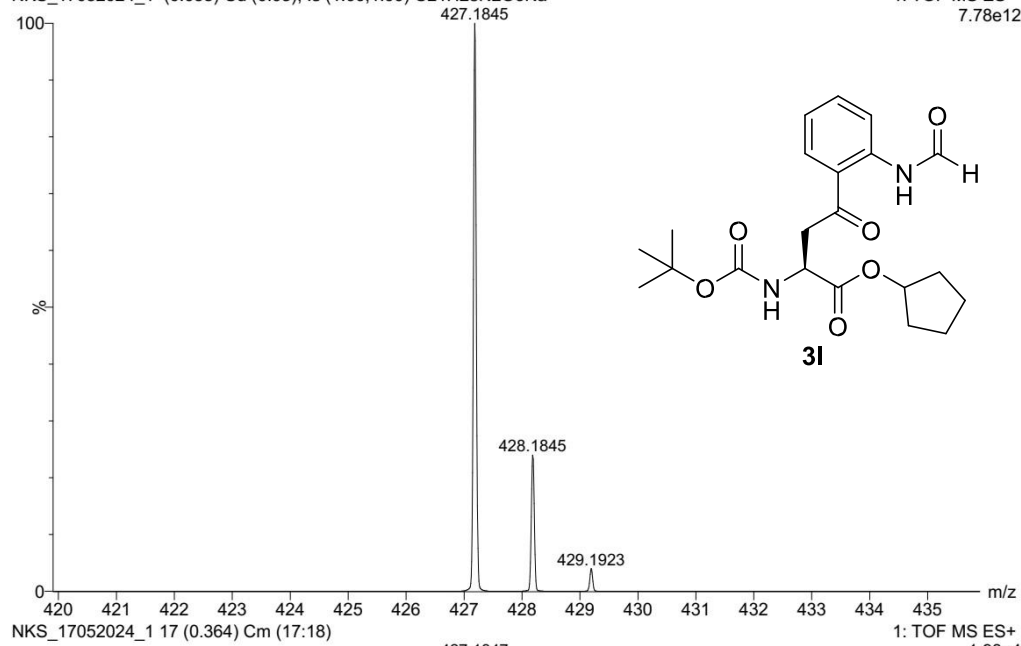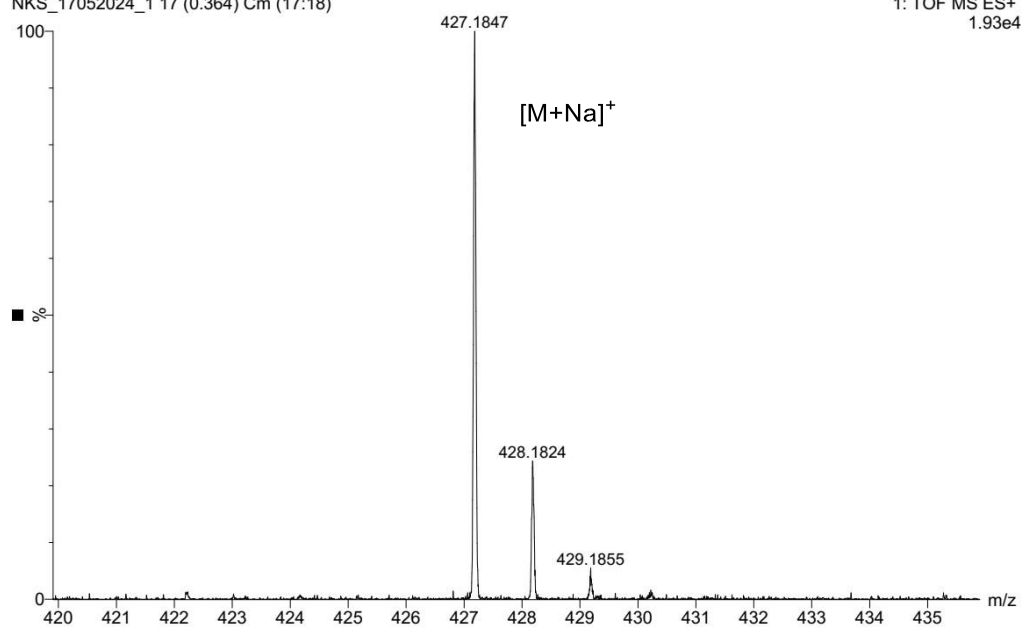

**Fig S92.** ESI-HRMS spectra of kynurenine derivative **31**.

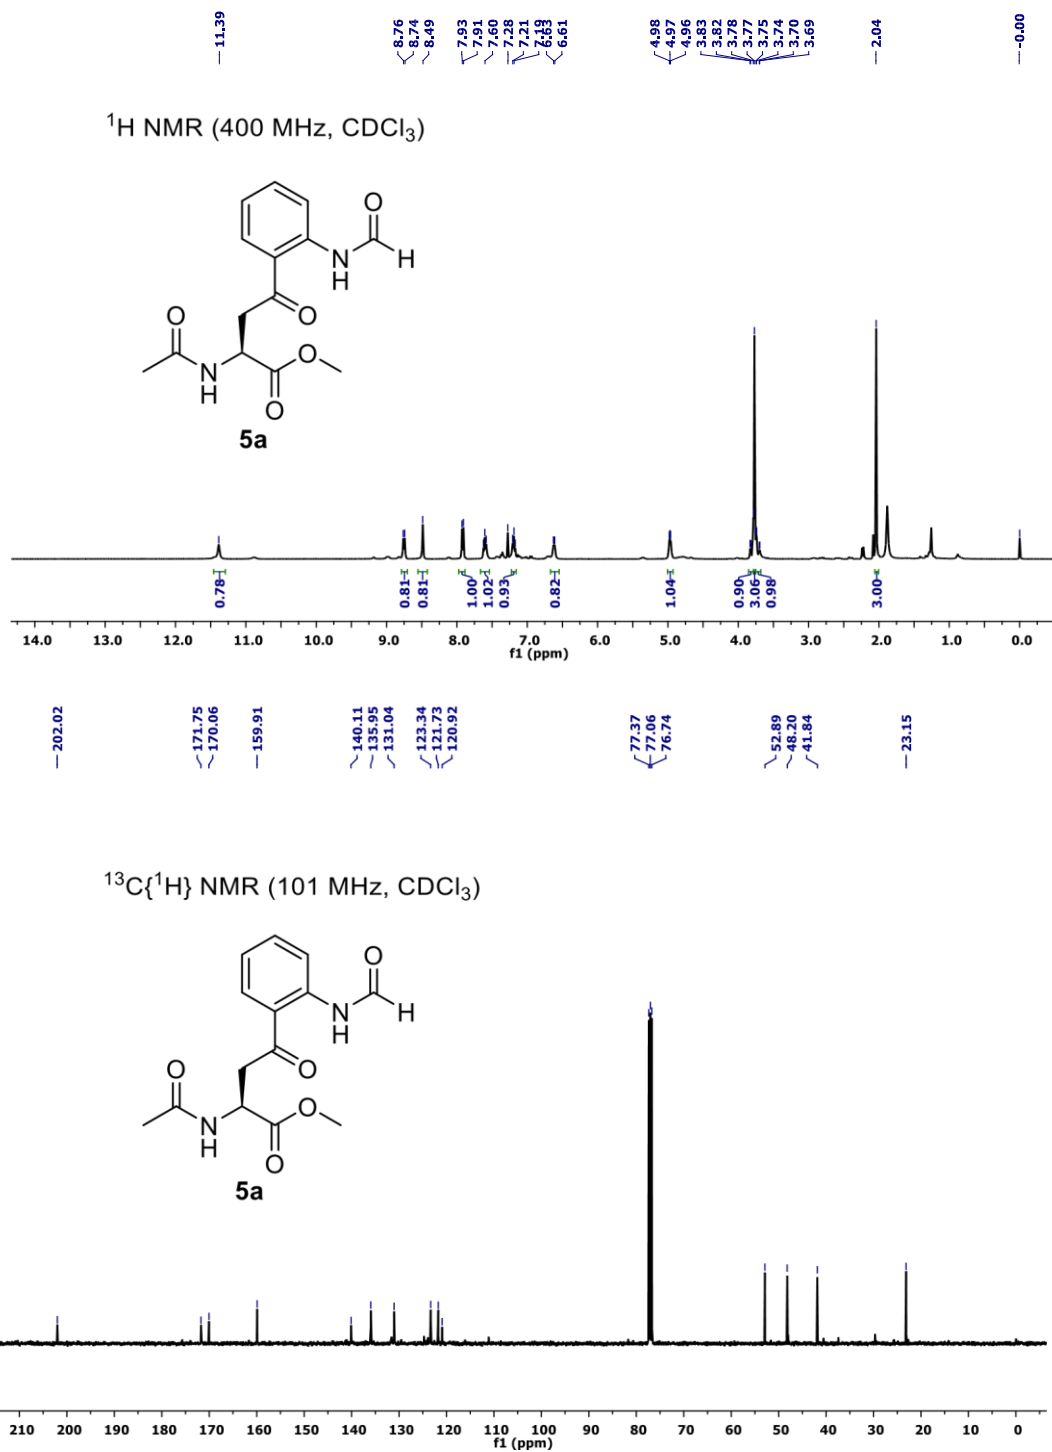

**Fig S93.** <sup>1</sup>H, <sup>13</sup>C {<sup>1</sup>H} NMR spectra of kynurenine derivative **5a**.

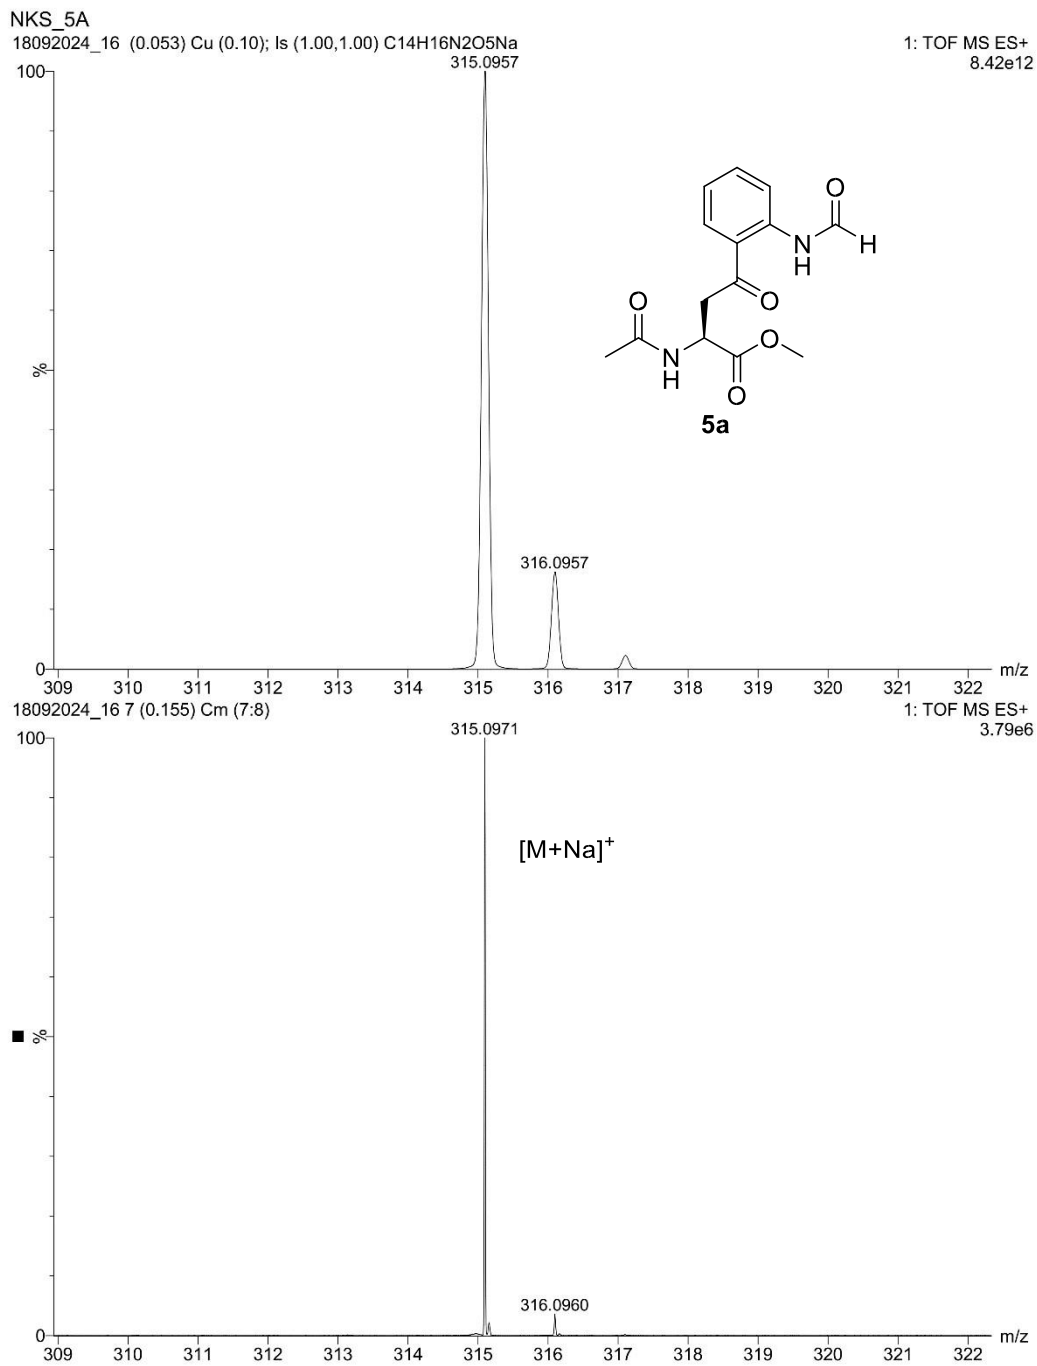

**Fig S94.** ESI-HRMS spectra of kynurenine derivative **5a**.

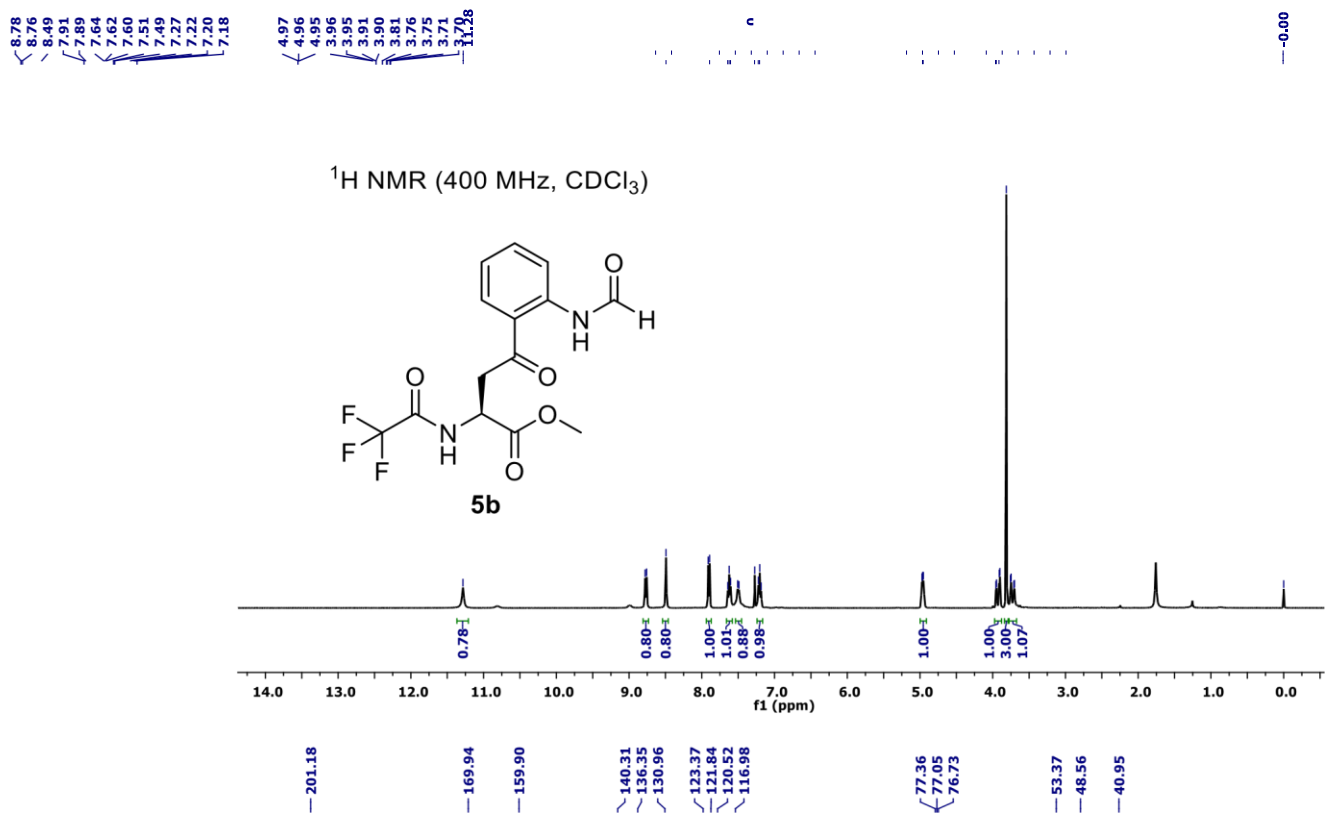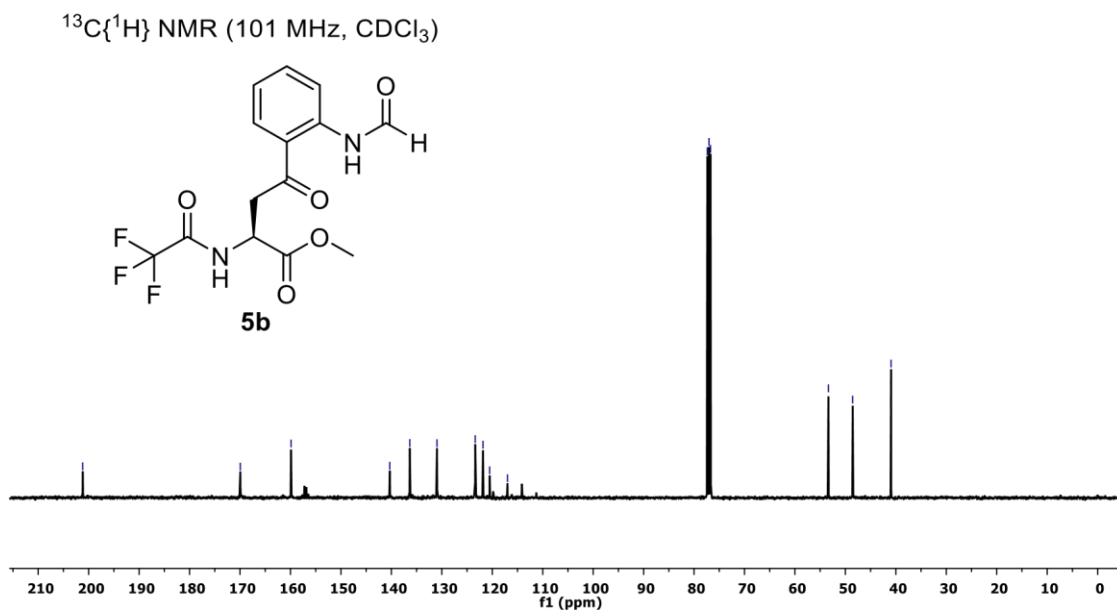

Fig S95. <sup>1</sup>H, <sup>13</sup>C {<sup>1</sup>H} NMR spectra of kynurenine derivative **5b**.

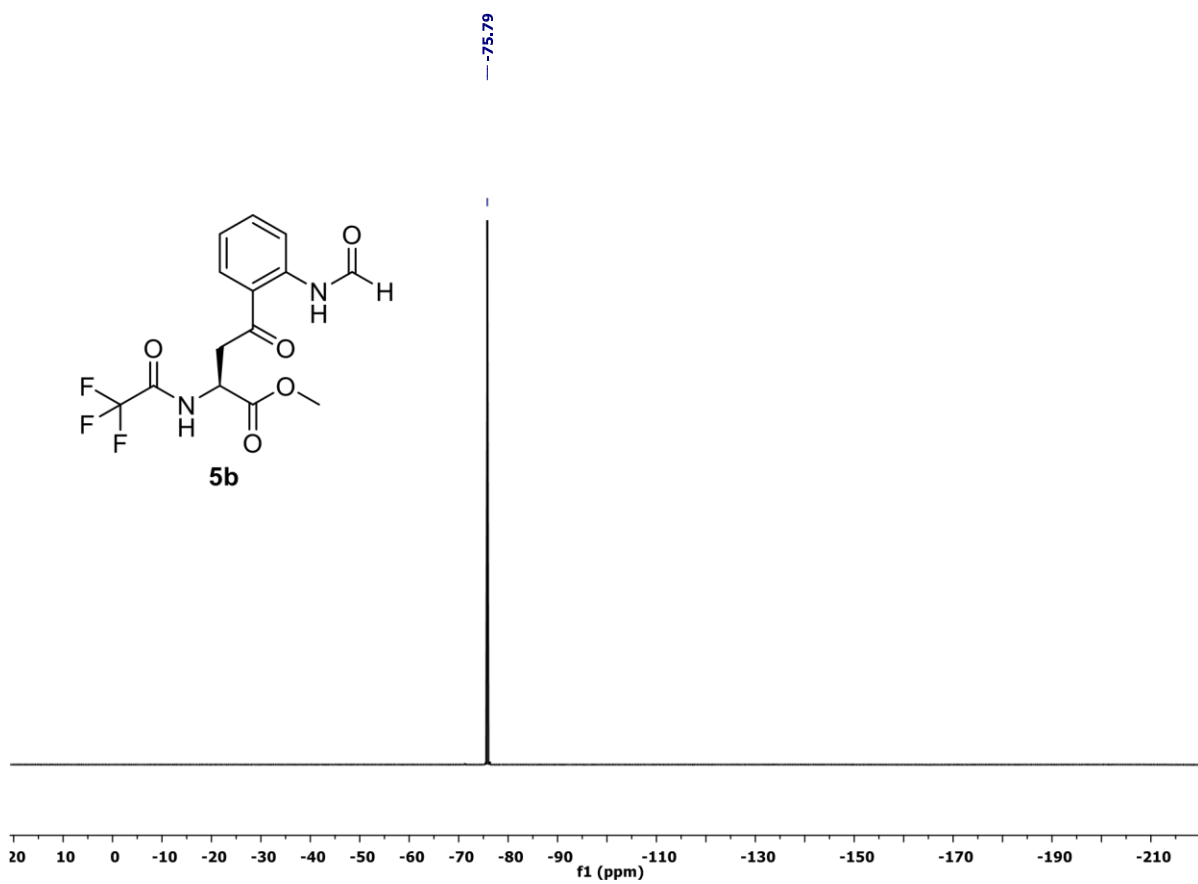

**Fig S96.**  $^{19}\text{F}$  NMR spectra (in  $\text{CDCl}_3$ ) of kynurenine derivative **5b**.

NKS\_CKJ\_1422 P

29-Jun-2024  
17:42:37

XEVO-G2XSQTOF#NotSet

NKS\_29062024\_6 (0.053) Cu (0.05); Is (1.00,1.00) C<sub>14</sub>H<sub>13</sub>N<sub>2</sub>O<sub>5</sub>F<sub>3</sub>Na

1: TOF MS ES+  
8.42e12

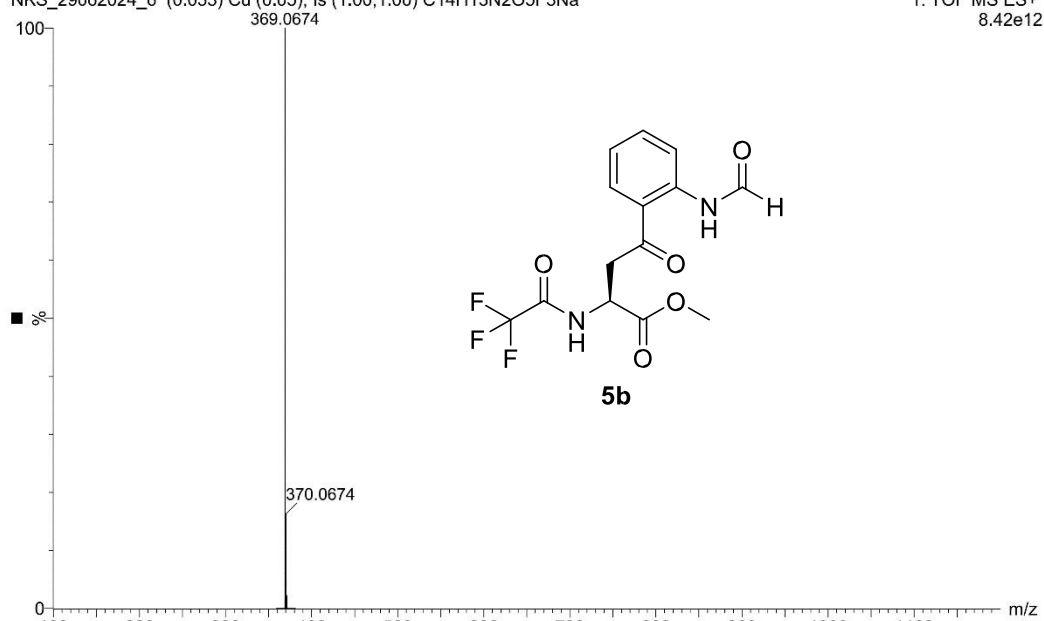

NKS\_29062024\_6 34 (0.691) Cm (34)  
369.0672

1: TOF MS ES+  
6.02e6

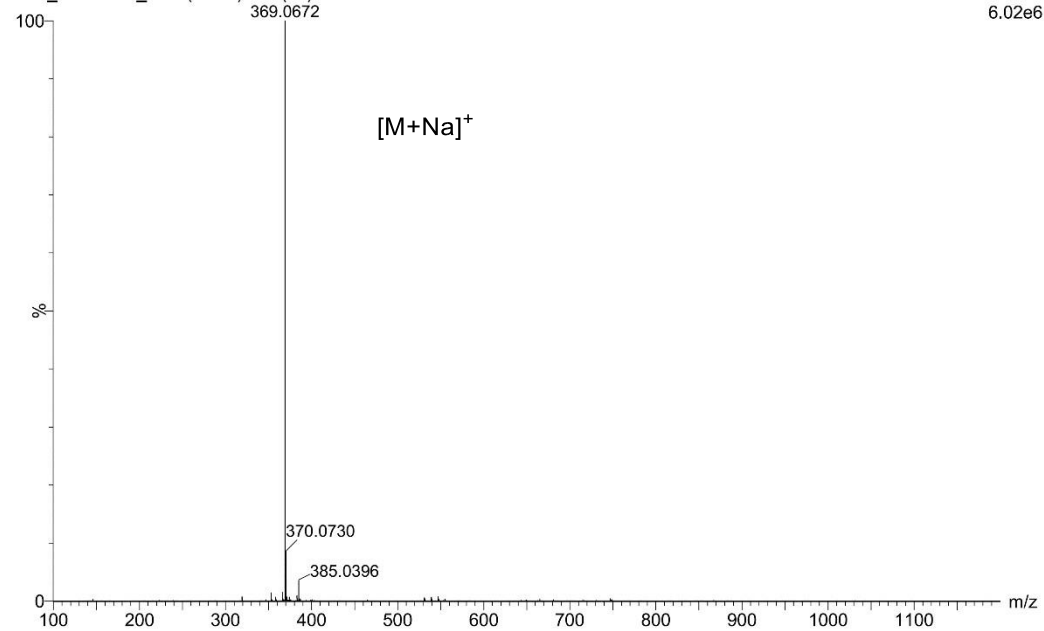

**Fig S97.** ESI-HRMS spectra of kynurenine derivative **5b**.

8.77  
8.75  
8.49  
7.93  
7.60  
7.58  
7.27  
7.21  
7.19  
6.49

4.99  
4.98  
4.97  
3.83  
3.82  
3.77  
3.75  
3.74  
3.76  
3.69  
2.33  
2.32  
2.31  
2.21  
2.20  
1.63  
1.62  
1.60  
1.25  
1.22  
0.89  
0.88  
0.86  
-1.39

<sup>1</sup>H NMR (400 MHz, CDCl<sub>3</sub>)

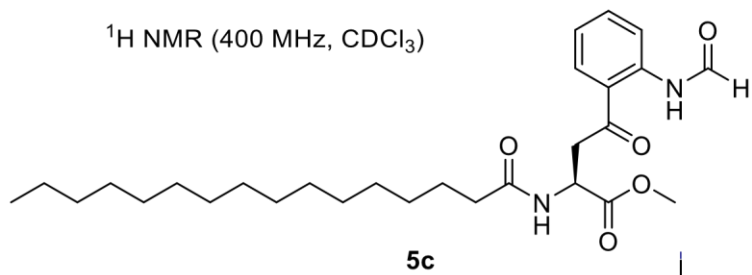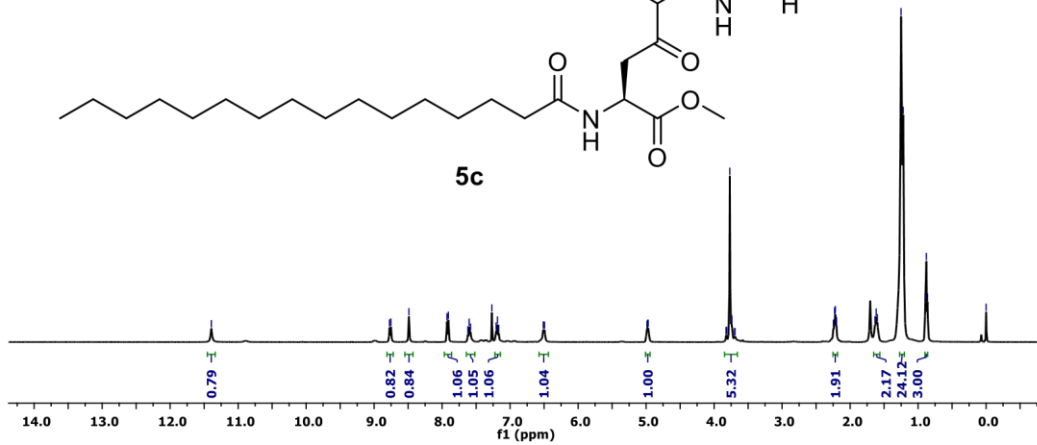

202.13  
173.07  
171.81  
159.82  
140.16  
135.95  
131.06  
123.31  
121.73  
120.91  
77.35  
77.04  
76.72  
52.85  
48.08  
41.85  
36.51  
31.93  
29.69  
29.67  
29.64  
29.60  
29.47  
28.37  
28.32  
28.20  
25.52  
22.70  
14.13  
-0.00

<sup>13</sup>C{<sup>1</sup>H} NMR (101 MHz, CDCl<sub>3</sub>)

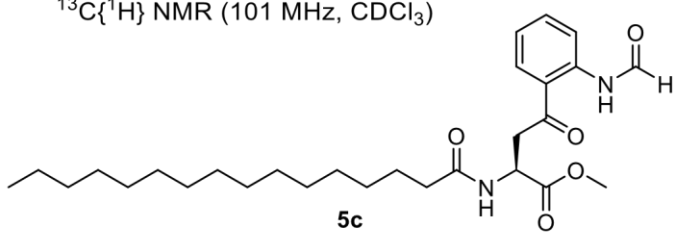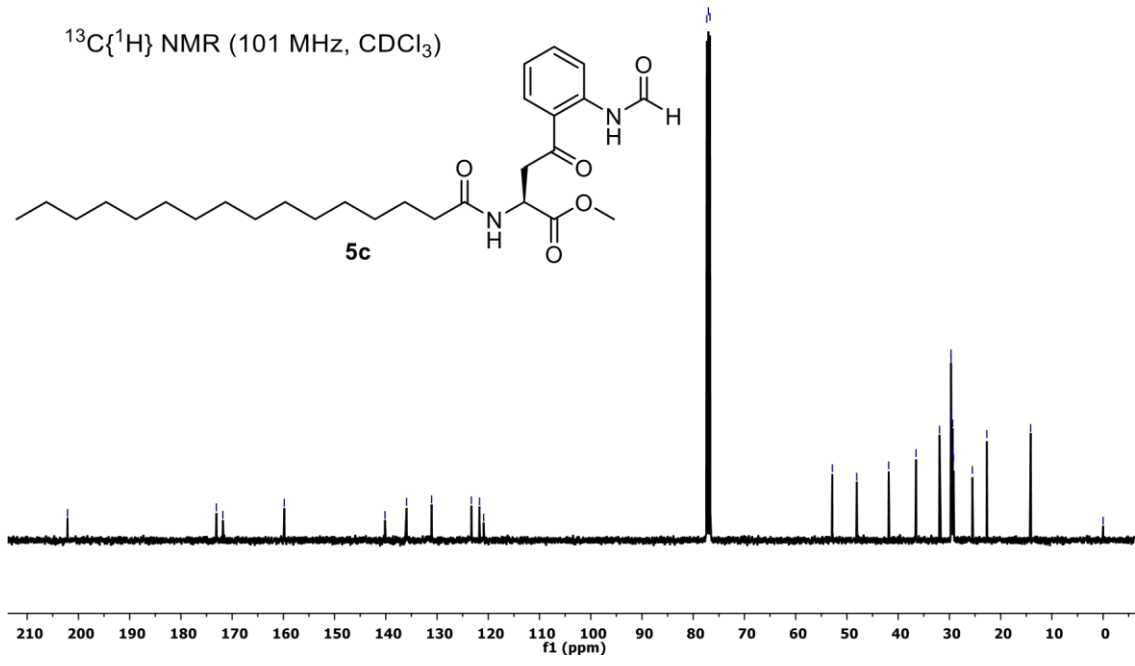

Fig S98. <sup>1</sup>H, <sup>13</sup>C {<sup>1</sup>H} NMR spectra of kynurenine derivative **5c**.

NKS\_ARP-96

29-Jun-2024  
18:39:51

XEVO-G2XSQTOF#NotSet  
NKS\_29062024\_9 (0.053) Cu (0.05); Is (1.00,1.00) C<sub>28</sub>H<sub>44</sub>N<sub>2</sub>O<sub>5</sub>Na

1: TOF MS ES+  
7.22e12

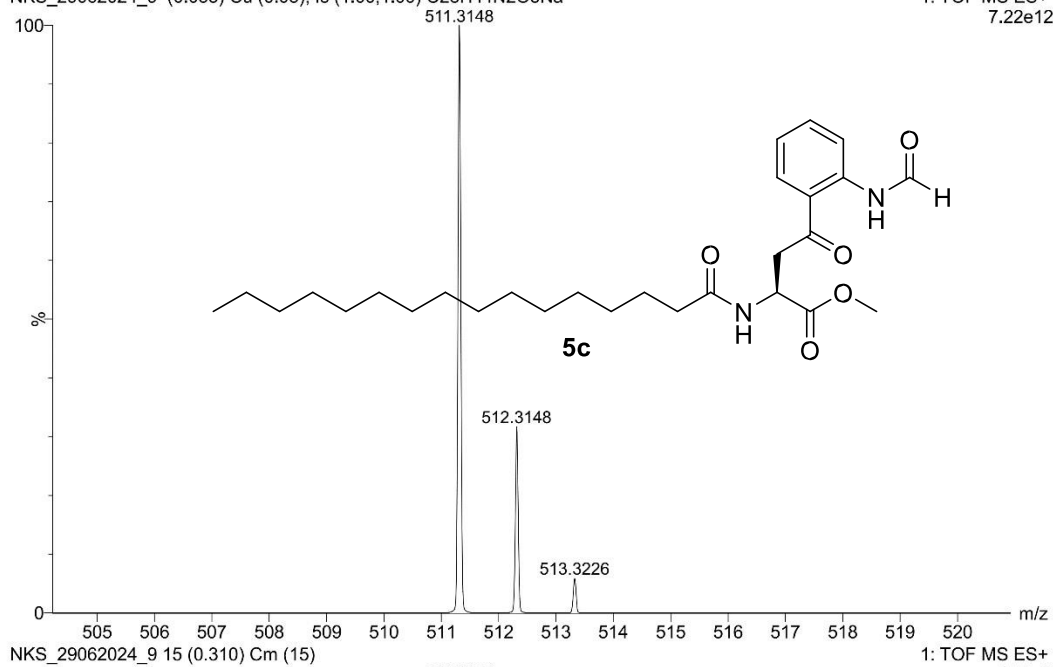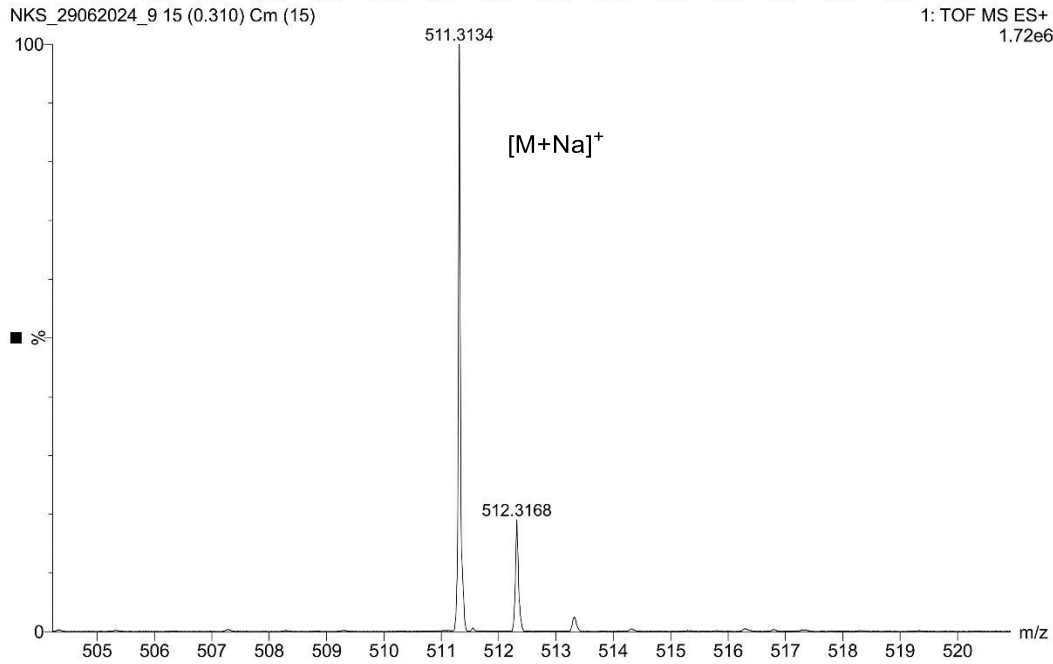

**Fig S99.** ESI-HRMS spectra of kynurenine derivative **5c**.



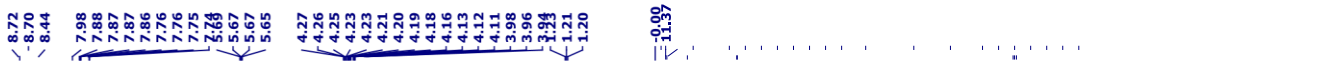

$^1\text{H}$  NMR (400 MHz,  $\text{CDCl}_3$ )

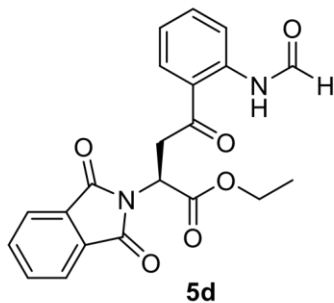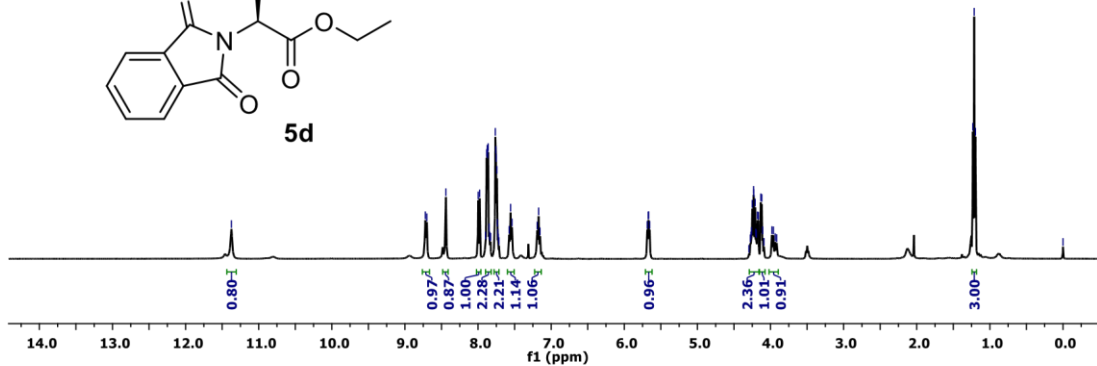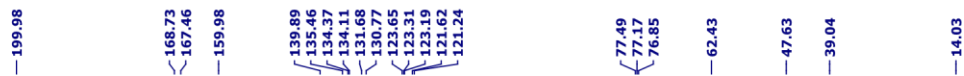

$^{13}\text{C}\{^1\text{H}\}$  NMR (101 MHz,  $\text{CDCl}_3$ )

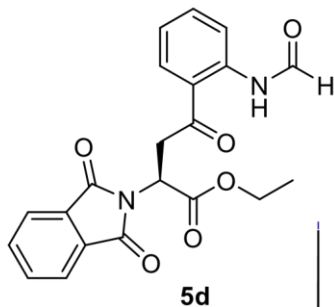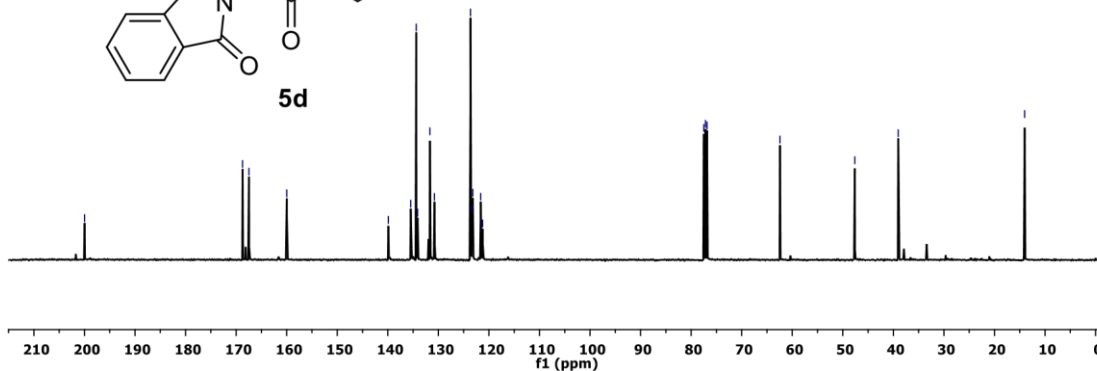

**Fig S100.**  $^1\text{H}$ ,  $^{13}\text{C}\{^1\text{H}\}$  NMR spectra of kynurenine derivative **5d**.

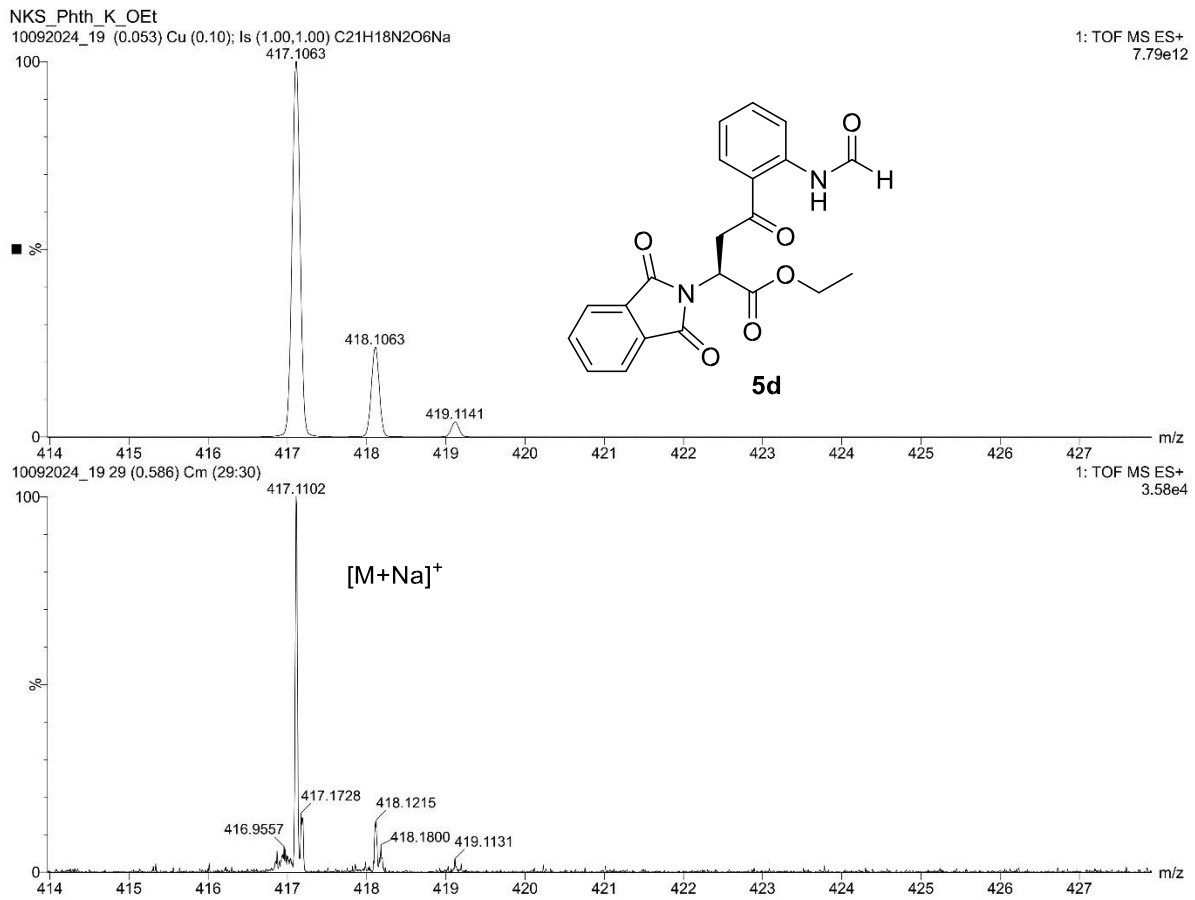

**Fig S101.** ESI-HRMS spectra of kynurenine derivative **5d**.

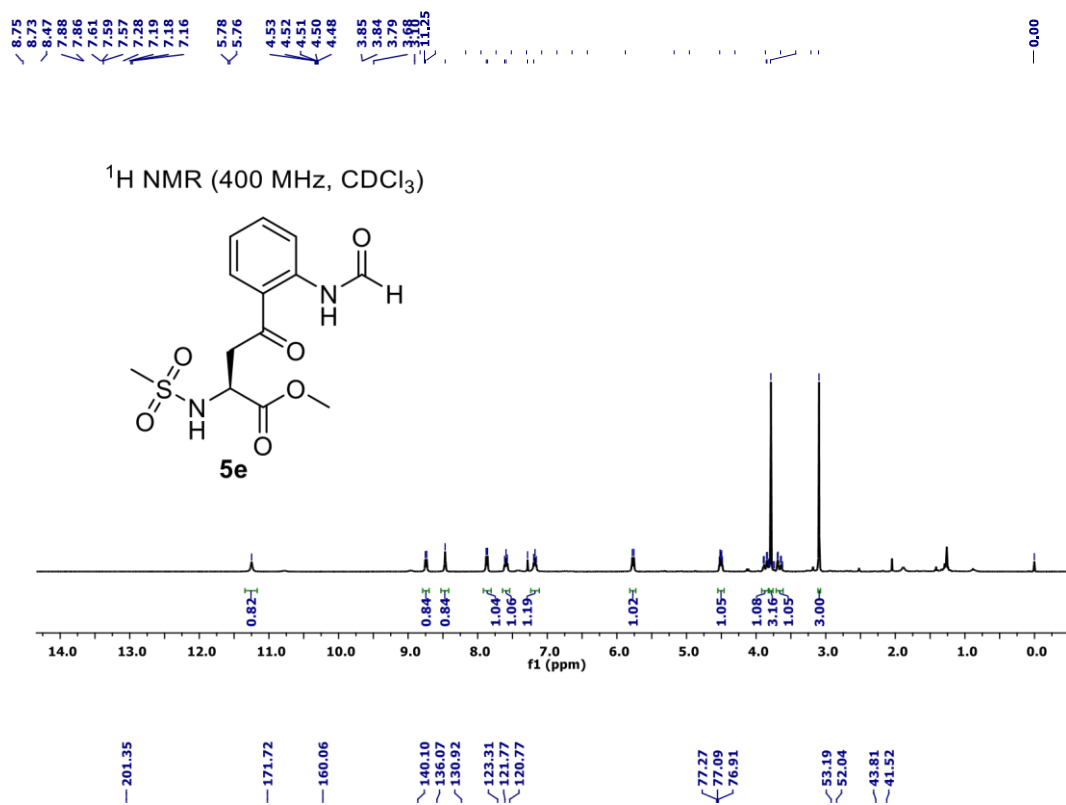

**Fig S102.** <sup>1</sup>H, <sup>13</sup>C {<sup>1</sup>H} NMR spectra of kynurenine derivative **5e**.

NKS\_ARP\_77

05-May-2024  
23:36:47

XEVO-G2XSQTOF#NotSet

NKS\_05052024\_12 (0.053) Cu (0.05); Is (1.00,1.00) C13H16N2O6SNa

1: TOF MS ES+  
8.07e12

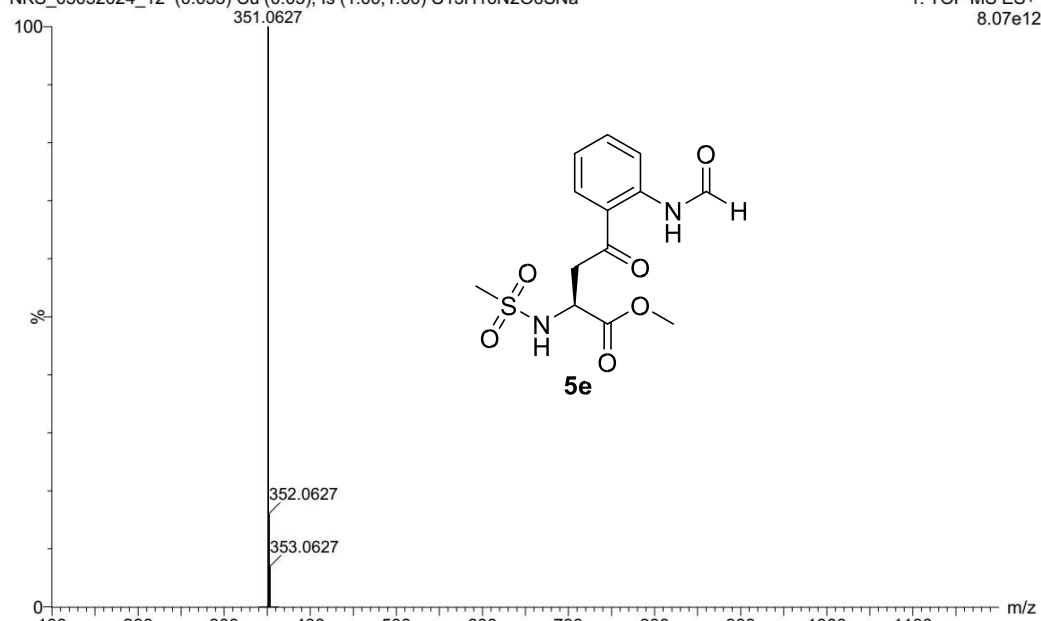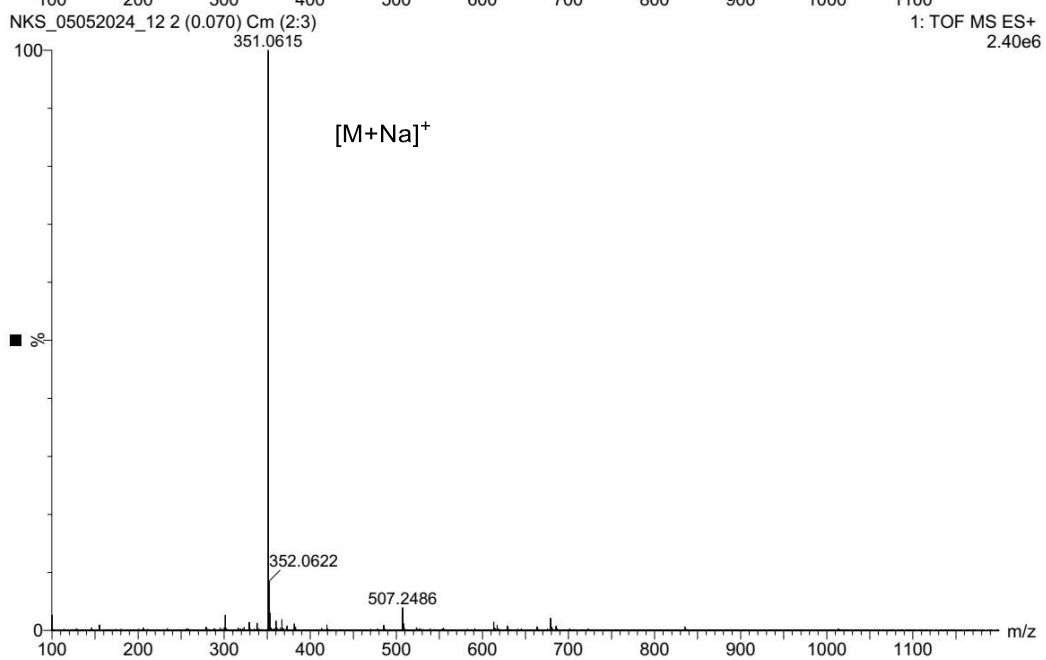

**Fig S103.** ESI-HRMS spectra of kynurenine derivative **5e**.

8.75  
8.72  
8.47  
7.88  
7.86  
7.61  
7.59  
7.29  
7.19  
7.17  
7.16

5.70  
5.68  
4.50  
4.49  
4.48  
4.47  
4.46

3.83  
3.78  
3.68  
3.17  
3.15  
3.13

1.45  
1.43  
1.41

0.00  
-11.28

7

$^1\text{H}$  NMR (400 MHz,  $\text{CDCl}_3$ )

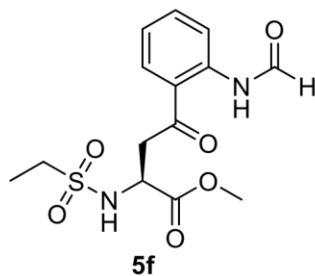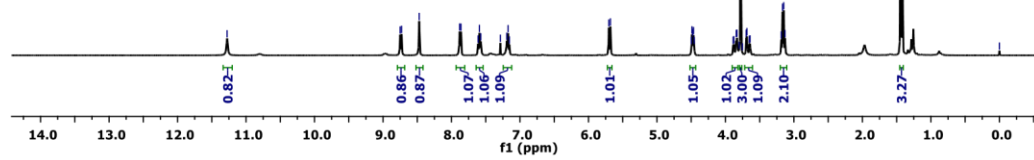

201.37  
171.70  
160.07  
140.06  
136.04  
130.95  
123.32  
121.75  
120.79  
77.42  
77.10  
76.79  
53.15  
52.00  
48.08  
43.96  
8.20

$^{13}\text{C}\{^1\text{H}\}$  NMR (101 MHz,  $\text{CDCl}_3$ )

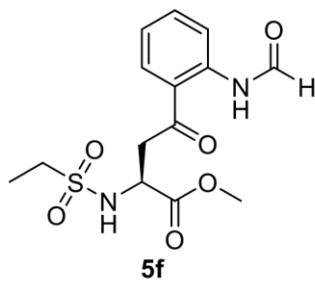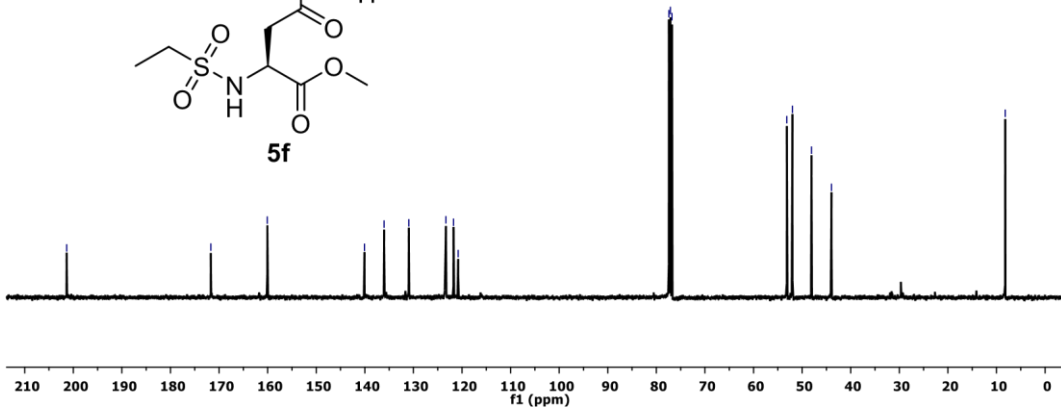

**Fig S104.**  $^1\text{H}$ ,  $^{13}\text{C}$   $\{^1\text{H}\}$  NMR spectra of kynurenine derivative **5f**.

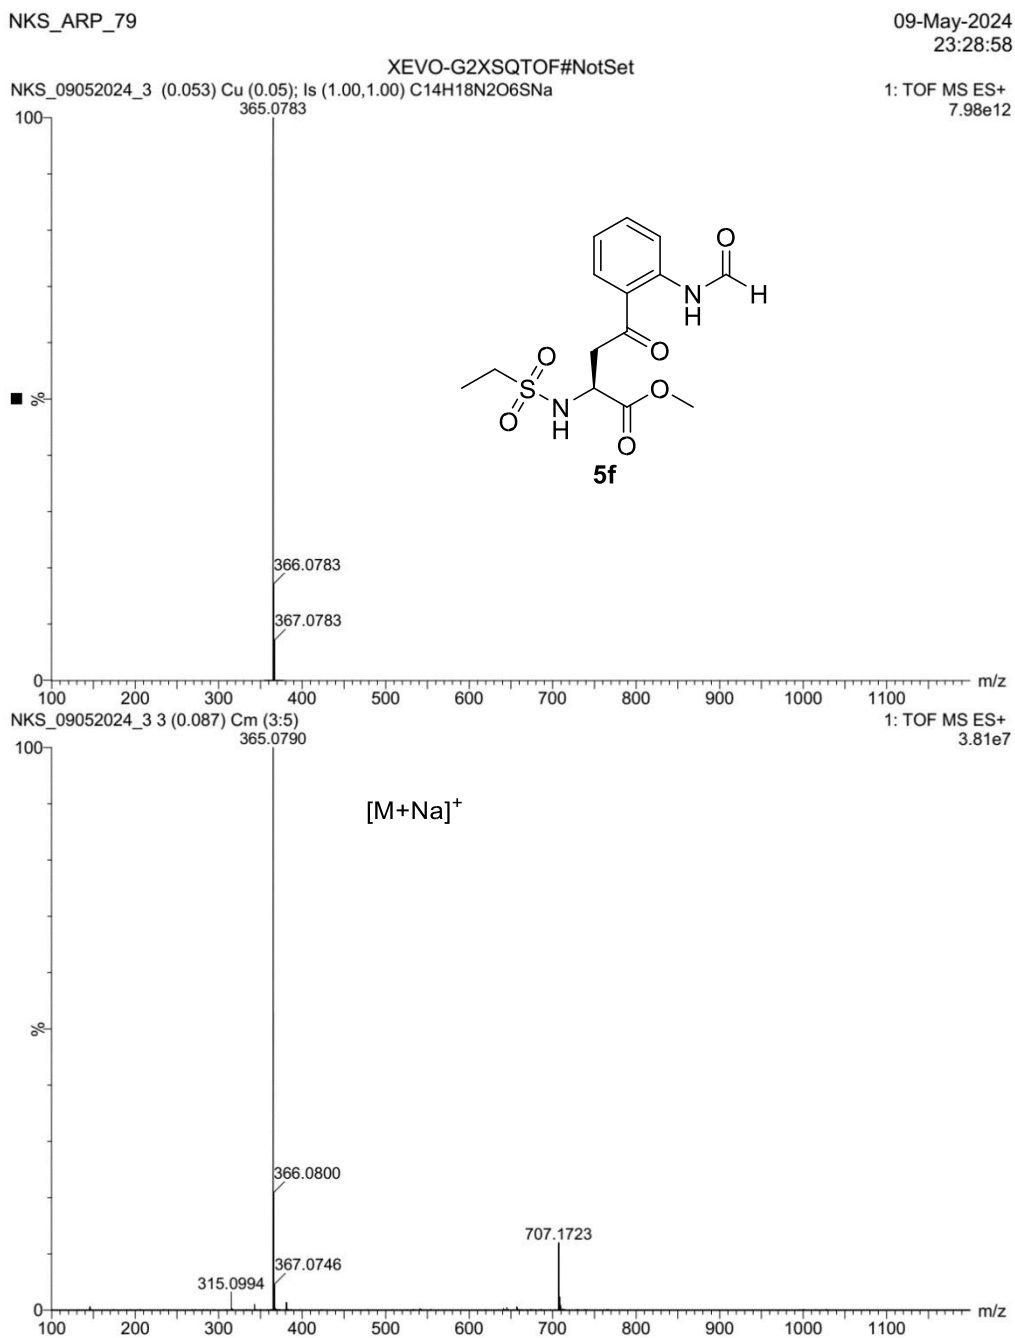

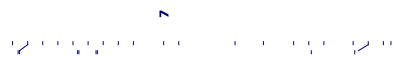

**Fig S105.** ESI-HRMS spectra of kynurenine derivative **5f**.

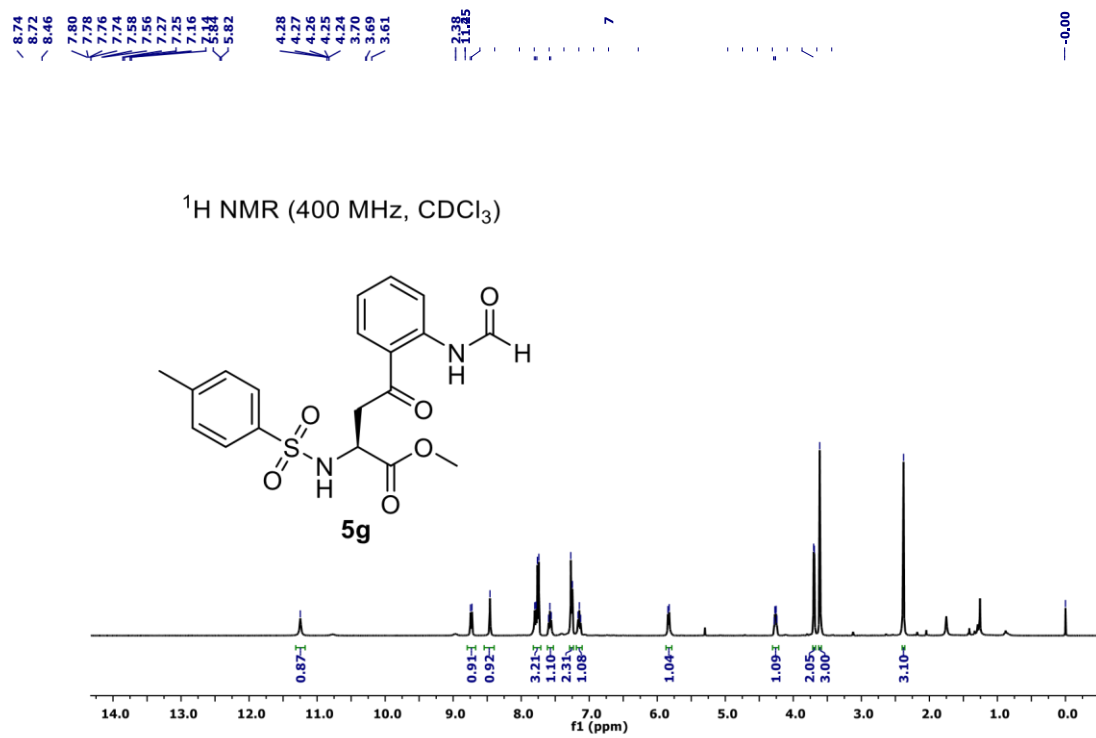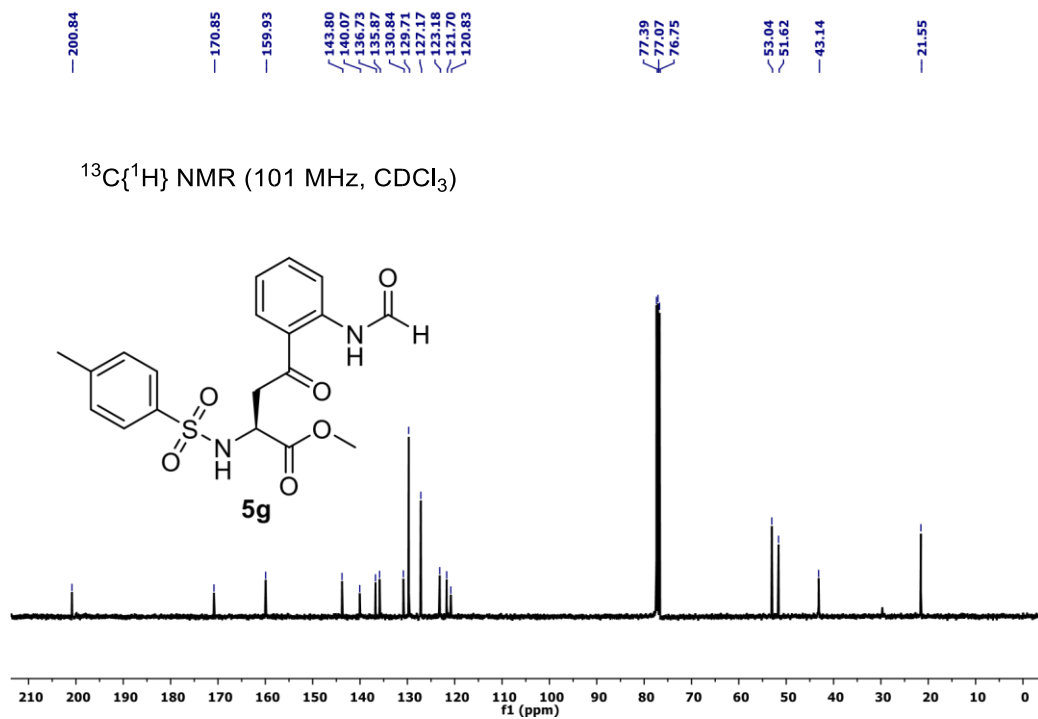

**Fig S106.** <sup>1</sup>H, <sup>13</sup>C {<sup>1</sup>H} NMR spectra of kynurenine derivative **5g**.



12 11 10 9 8 7 6 5 4 3 2 1

**Fig**  $^1\text{H}$ ,  $^{13}\text{C}$   $\{^1\text{H}\}$  NMR spectra of

NKS\_ARP\_80

09-May-2024  
23:37:50

XEVO-G2XSQTOF#NotSet

NKS\_09052024\_4 (0.053) Cu (0.05); Is (1.00,1.00) C<sub>19</sub>H<sub>20</sub>N<sub>2</sub>O<sub>6</sub>Na

1: TOF MS ES+  
7.56e12

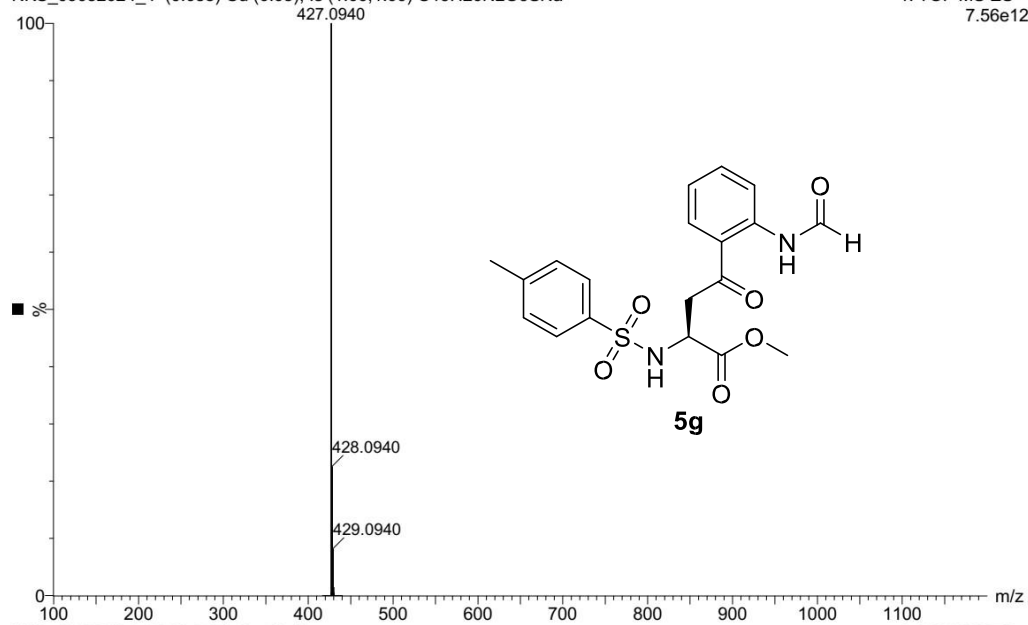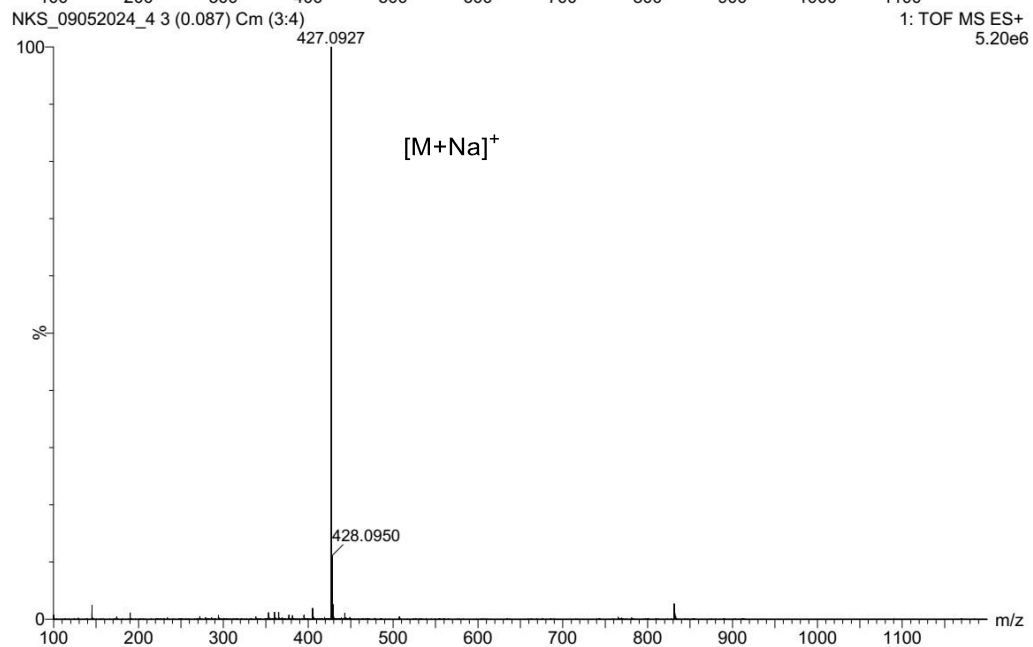

**Fig S107.** ESI-HRMS spectra of kynurenine derivative **5g**.

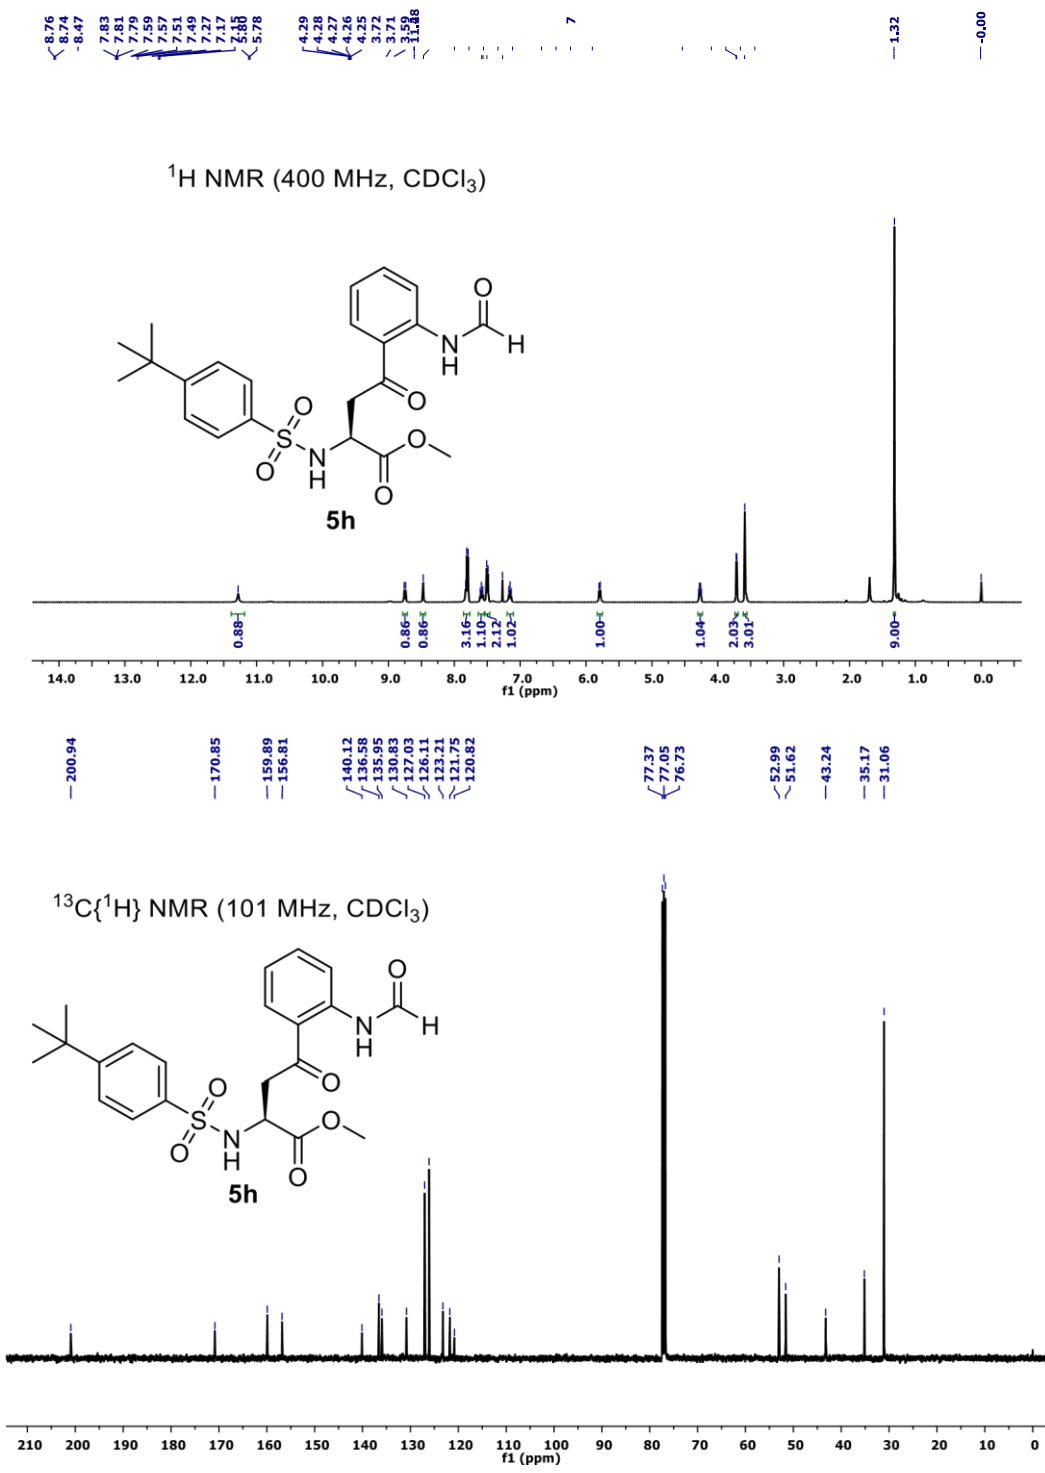

**Fig** <sup>1</sup>H, <sup>13</sup>C {<sup>1</sup>H} NMR spectra of

S108.

kynurenine derivative **5h**.

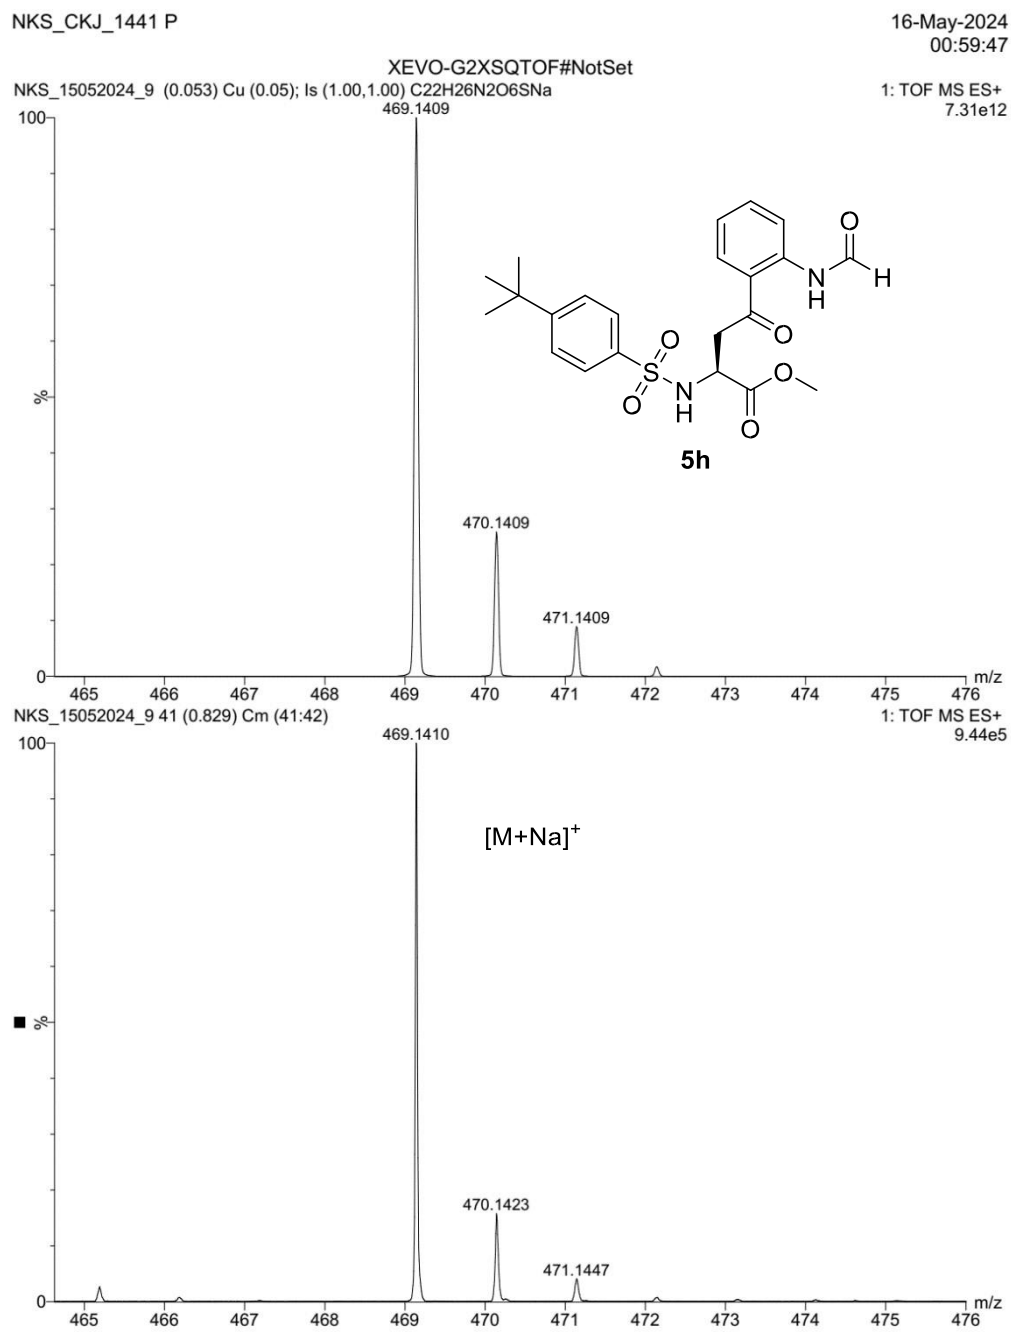

Fig S109. ESI-HRMS spectra of kynurenine derivative **5h**.

8.76  
8.74  
8.46  
7.84  
7.82  
7.61  
7.59  
7.57  
7.27  
7.15

5.67  
5.65

4.42  
4.11  
4.09  
4.08

3.75  
3.74  
3.73  
3.64

2.90  
2.88  
2.86  
2.85

1.30  
1.28  
1.26  
1.24  
1.22

0.00  
-11.89

$^1\text{H}$  NMR (400 MHz,  $\text{CDCl}_3$ )

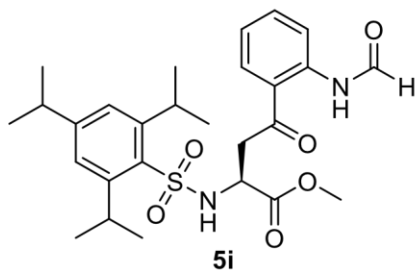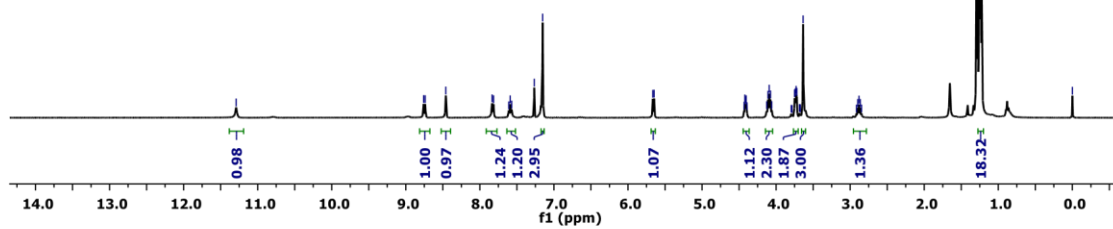

201.07

171.19

159.83

153.08

150.14

140.08

135.91

132.59

130.84

123.85

123.72

121.74

120.89

77.37

77.05

76.73

53.00

51.24

43.07

34.12

29.98

24.94

24.76

23.57

23.54

$^{13}\text{C}\{^1\text{H}\}$  NMR (101 MHz,  $\text{CDCl}_3$ )

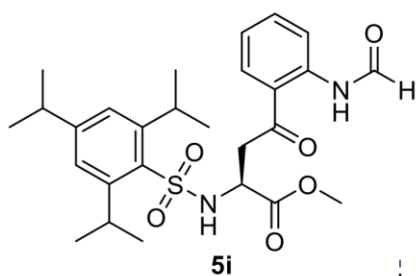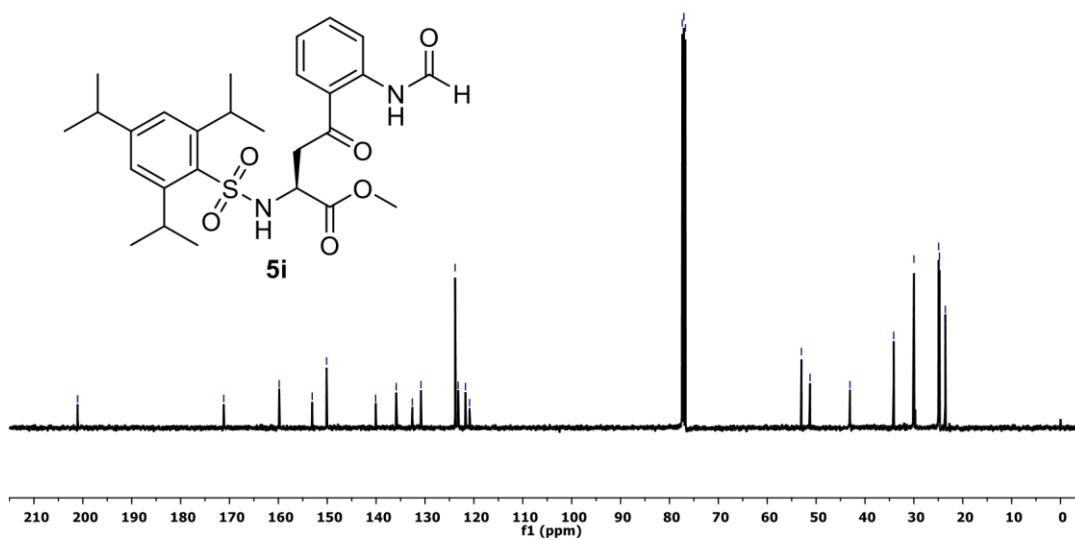

Fig  $^1\text{H}$ ,  $^{13}\text{C}\{^1\text{H}\}$  NMR spectra of

S110.

kynurenine derivative **5i**.

NKS\_ARP-78

29-Jun-2024  
18:10:56

XEVO-G2XSQTOF#NotSet  
NKS\_29062024\_7 (0.053) Cu (0.05); Is (1.00,1.00) C27H37N2O6S

1: TOF MS ES+  
6.92e12

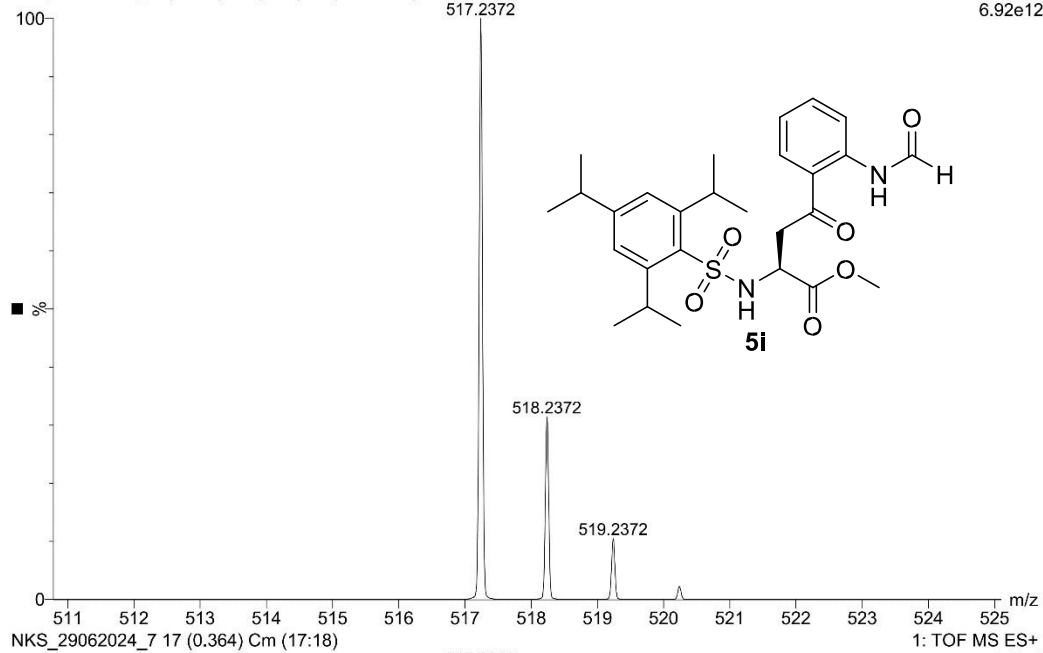

NKS\_29062024\_7 17 (0.364) Cm (17:18)

1: TOF MS ES+  
1.48e6

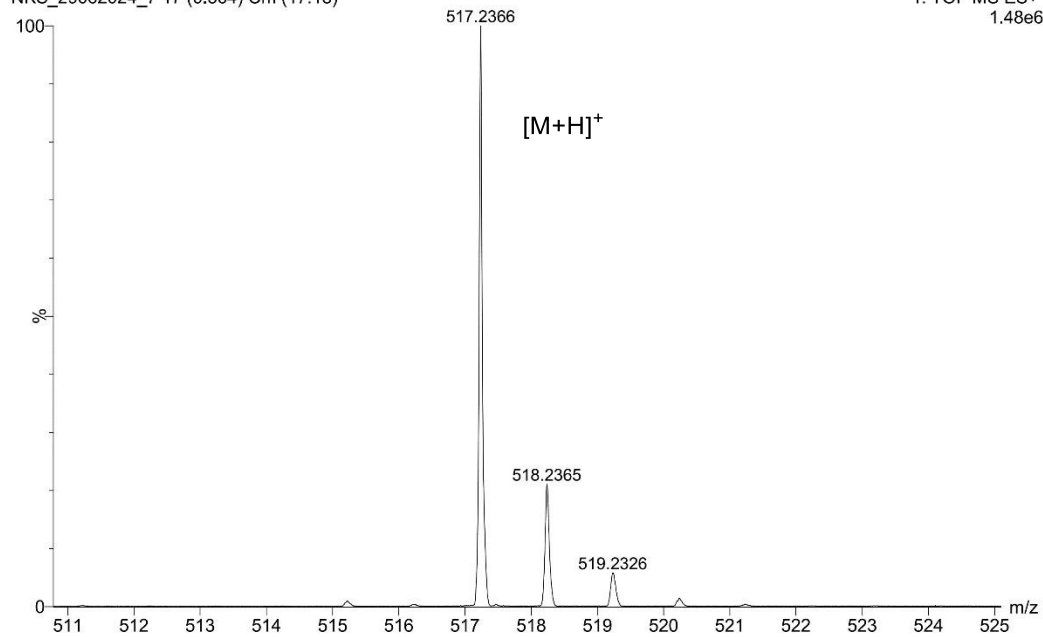

Fig S111. ESI-HRMS spectra of kynurenine derivative **5i**.

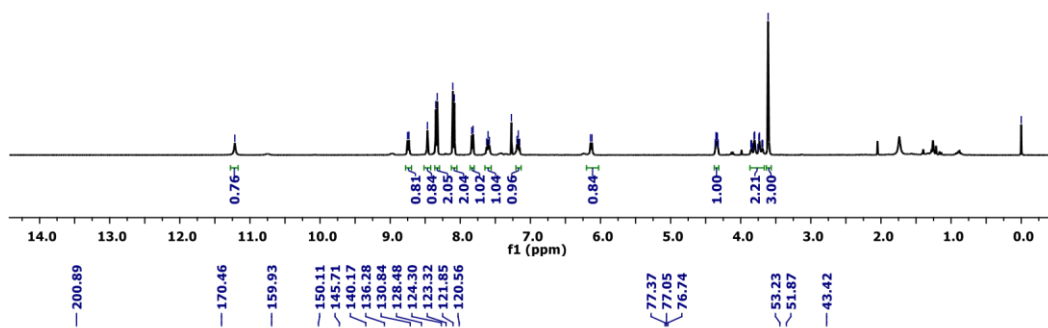

$^{13}\text{C}\{^1\text{H}\}$  NMR (101 MHz,  $\text{CDCl}_3$ )

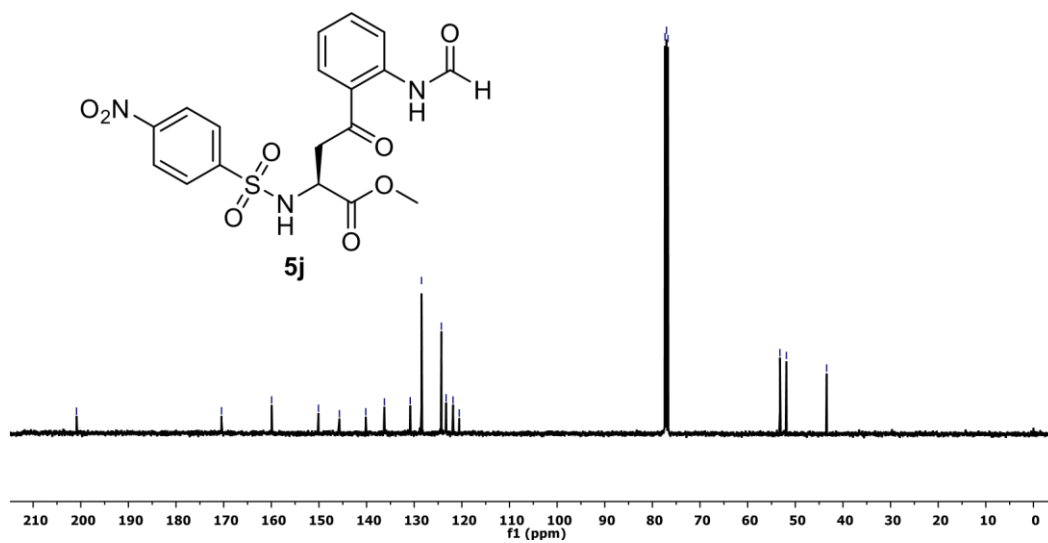

Fig  $^1\text{H}$ ,  $^{13}\text{C}\{^1\text{H}\}$  NMR spectra of

S112.

kynurenine derivative **5j**.

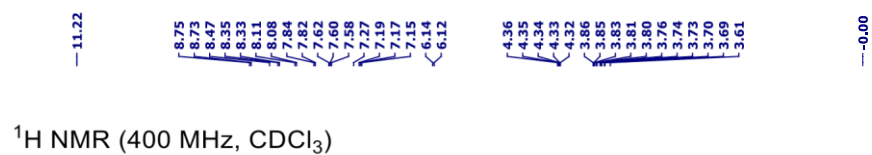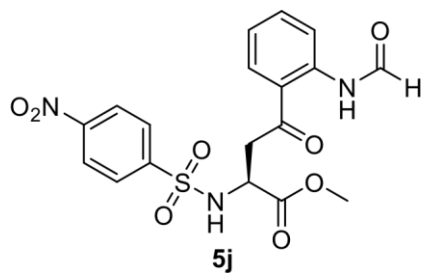



NKS\_CKJ\_1440 P

16-May-2024  
00:47:18

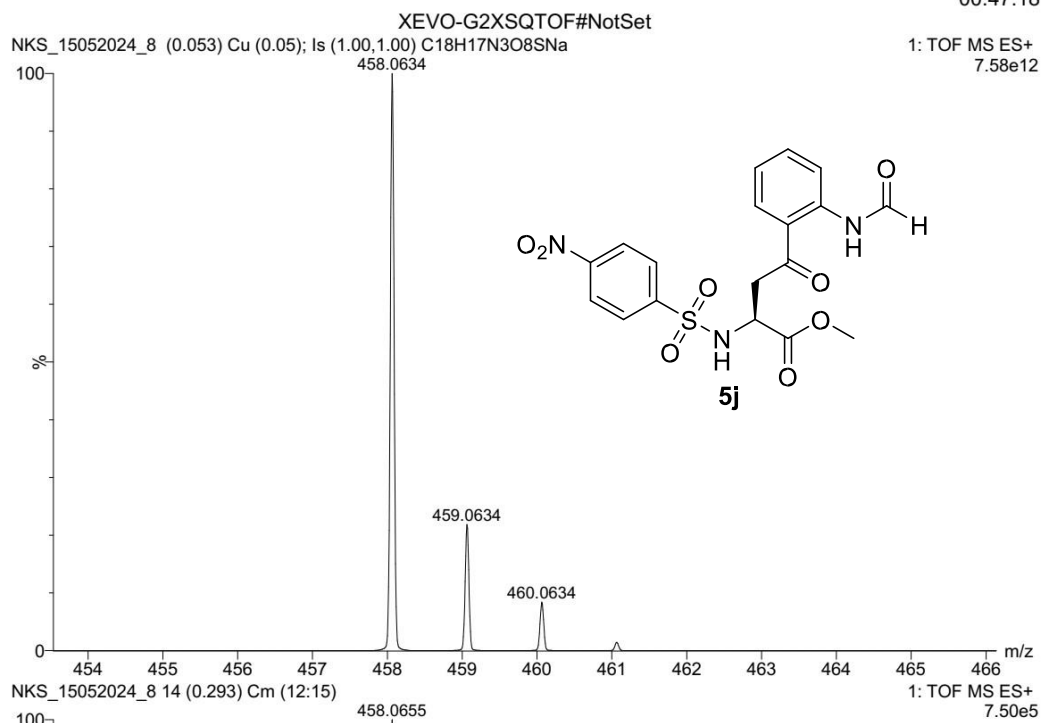

**Fig** <sup>1</sup>H, <sup>13</sup>C {<sup>1</sup>H} NMR spectra of

**Fig S113.** ESI-HRMS spectra of kynurenine derivative **5j**.

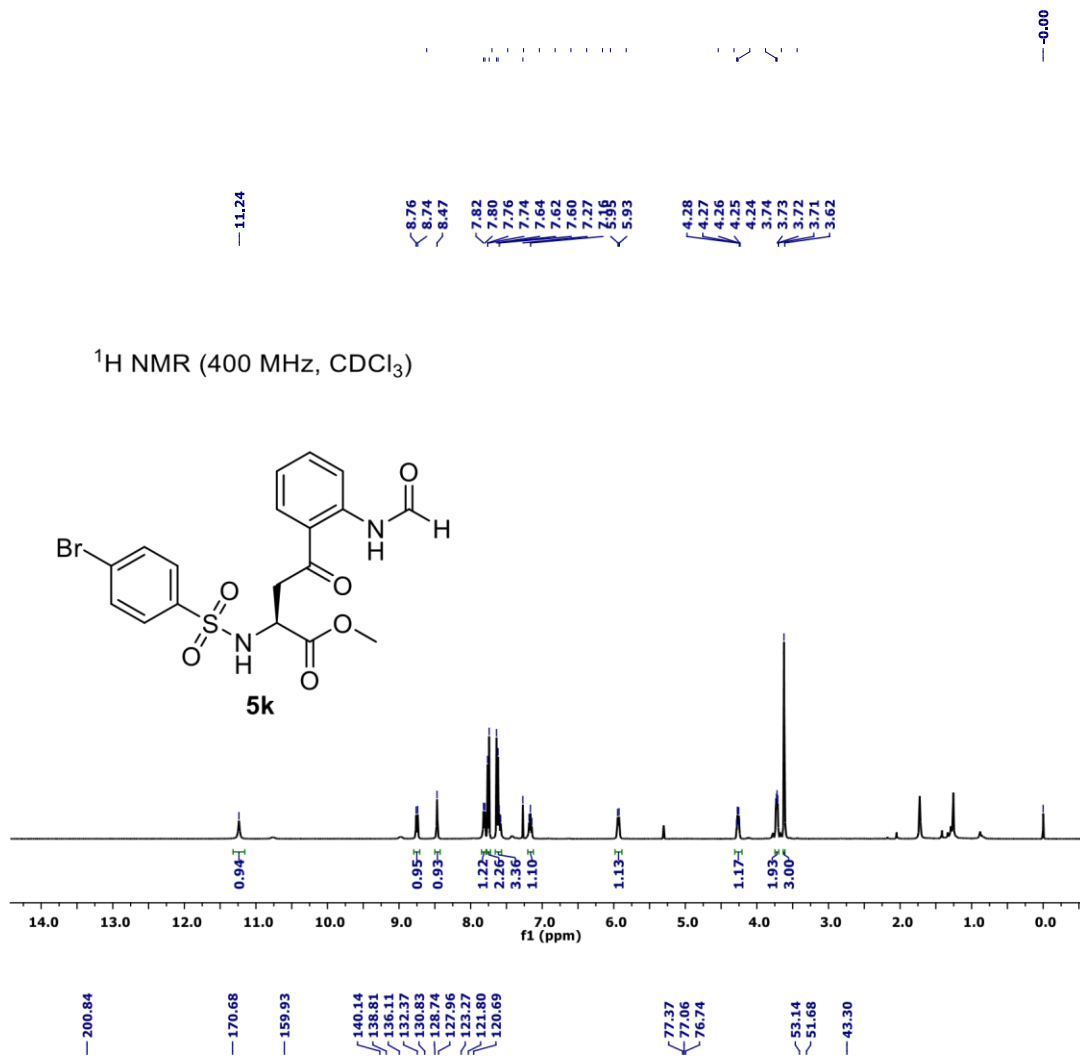

**Fig**  $^1\text{H}$ ,  $^{13}\text{C}$   $\{^1\text{H}\}$  NMR spectra of

$^{13}\text{C}\{^1\text{H}\}$  NMR (101 MHz,  $\text{CDCl}_3$ )

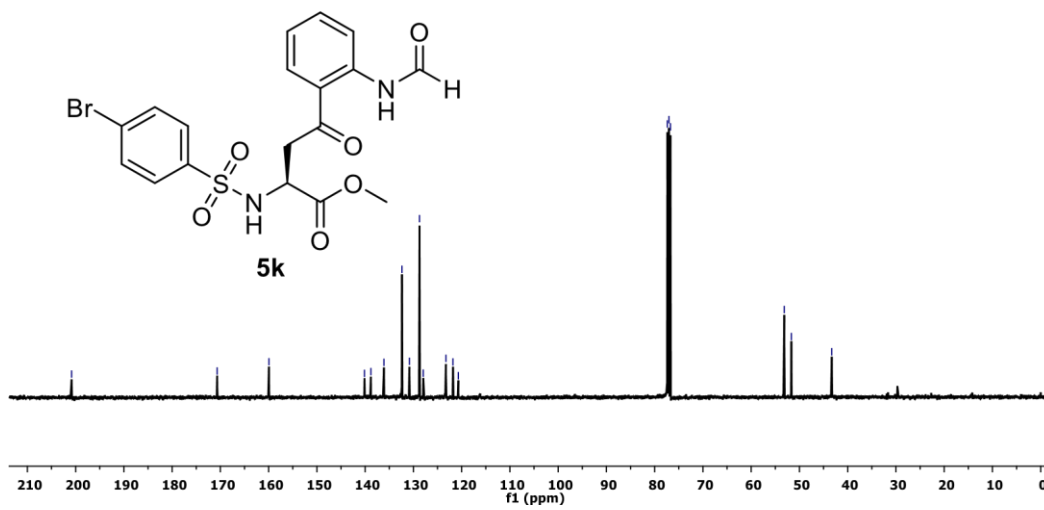

**S114.**

kynurenine derivative **5k**.

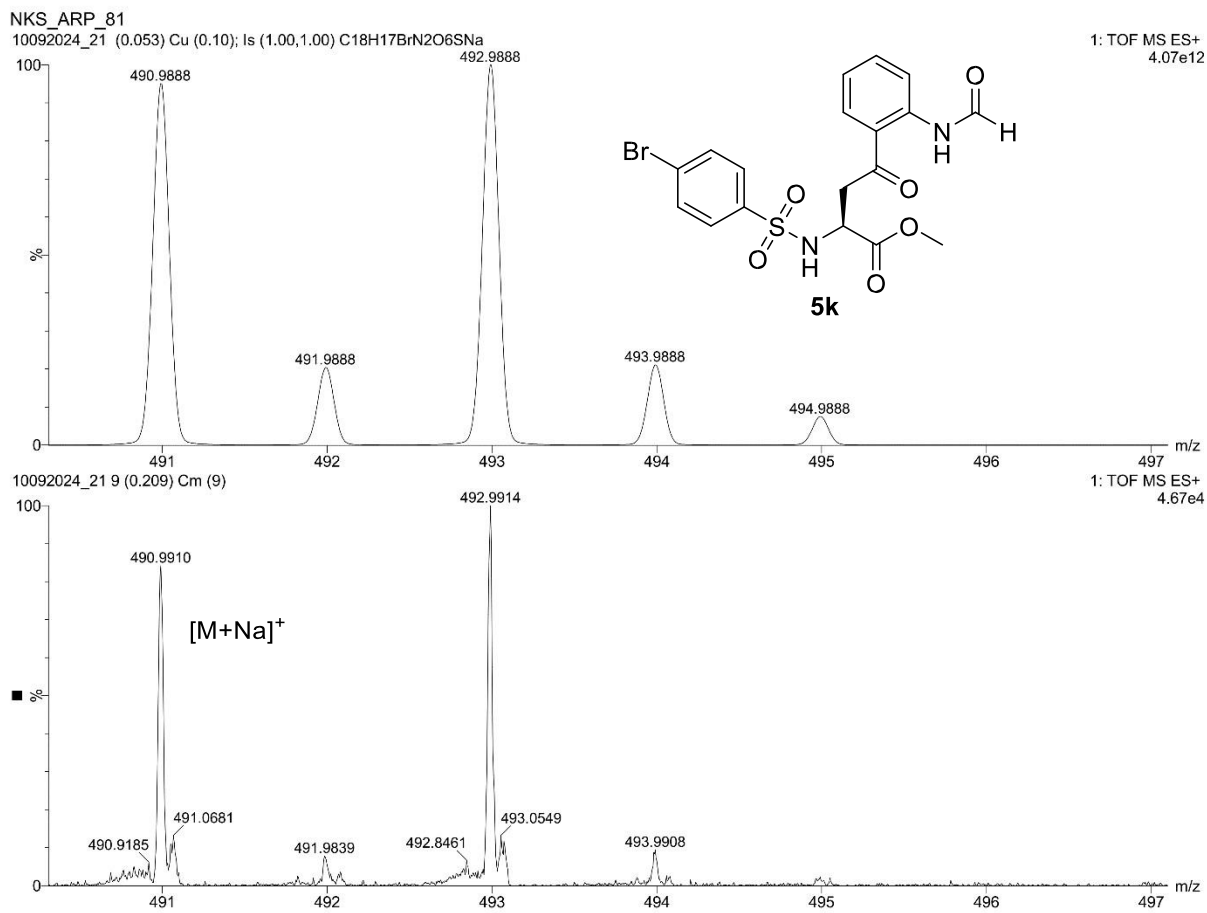

**Fig S115.** ESI-HRMS spectra of kynurenine derivative **5k**.

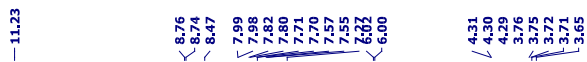

**Fig**  $^1\text{H}$ ,  $^{13}\text{C}$   $\{^1\text{H}\}$  NMR spectra of

$^1\text{H}$  NMR (400 MHz,  $\text{CDCl}_3$ )

-0.00

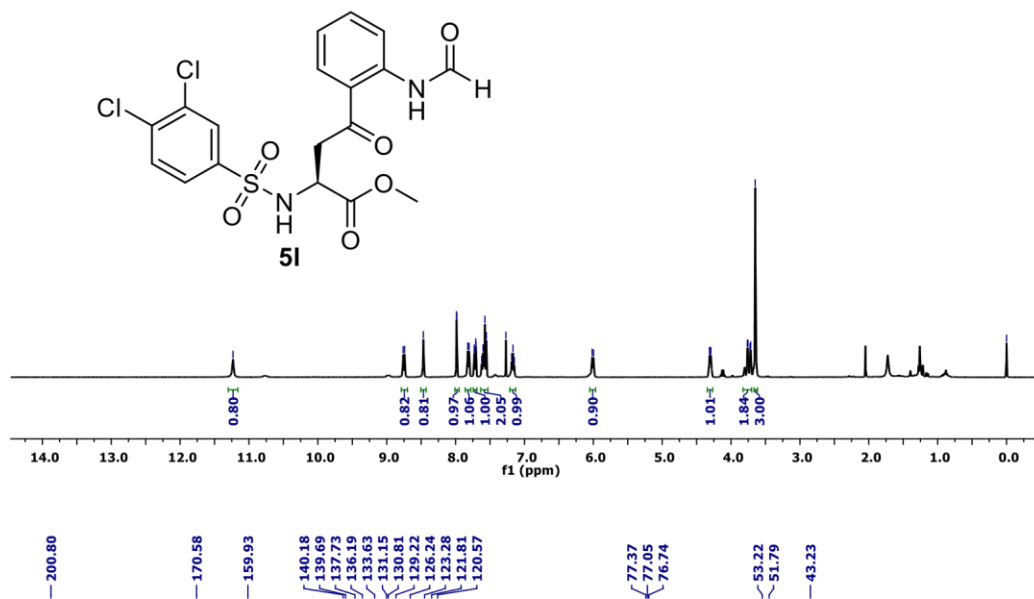

$^{13}\text{C}\{^1\text{H}\}$  NMR (101 MHz,  $\text{CDCl}_3$ )

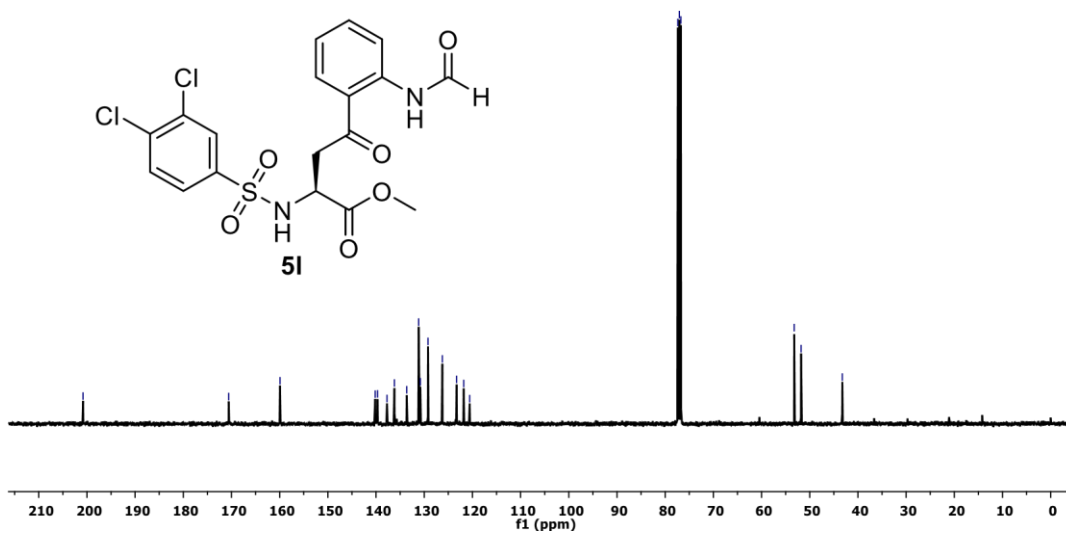

S116.

kynurenine derivative **5l**.

NKS\_CKJ\_1443 P

16-May-2024  
01:09:01

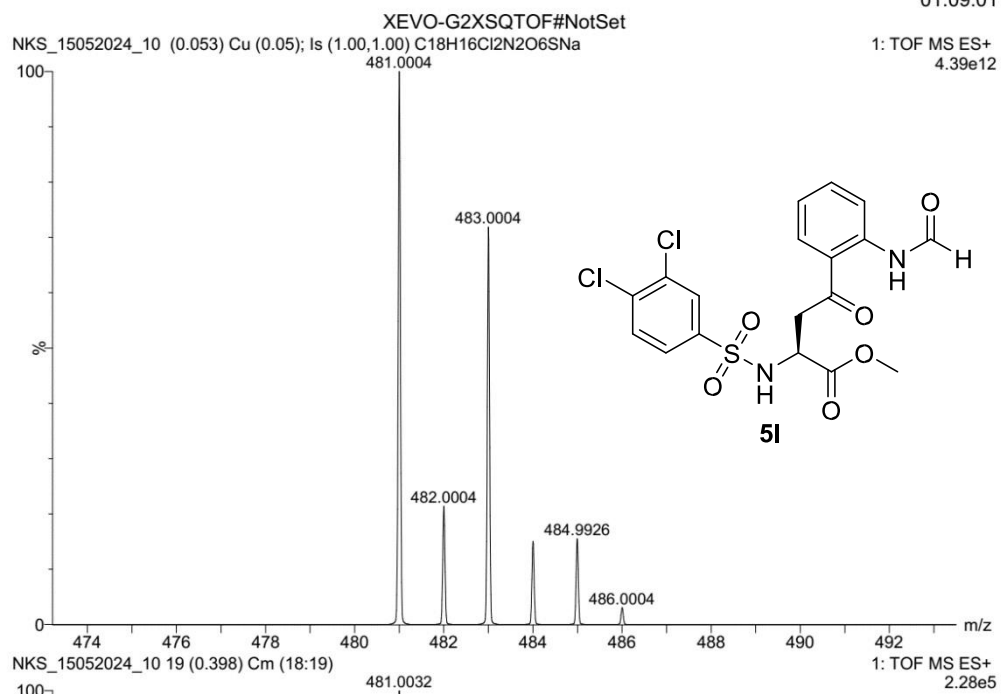

Fig <sup>1</sup>H, <sup>13</sup>C {<sup>1</sup>H} NMR spectra of

**Fig S117.** ESI-HRMS spectra of kynurenine derivative **5l**.



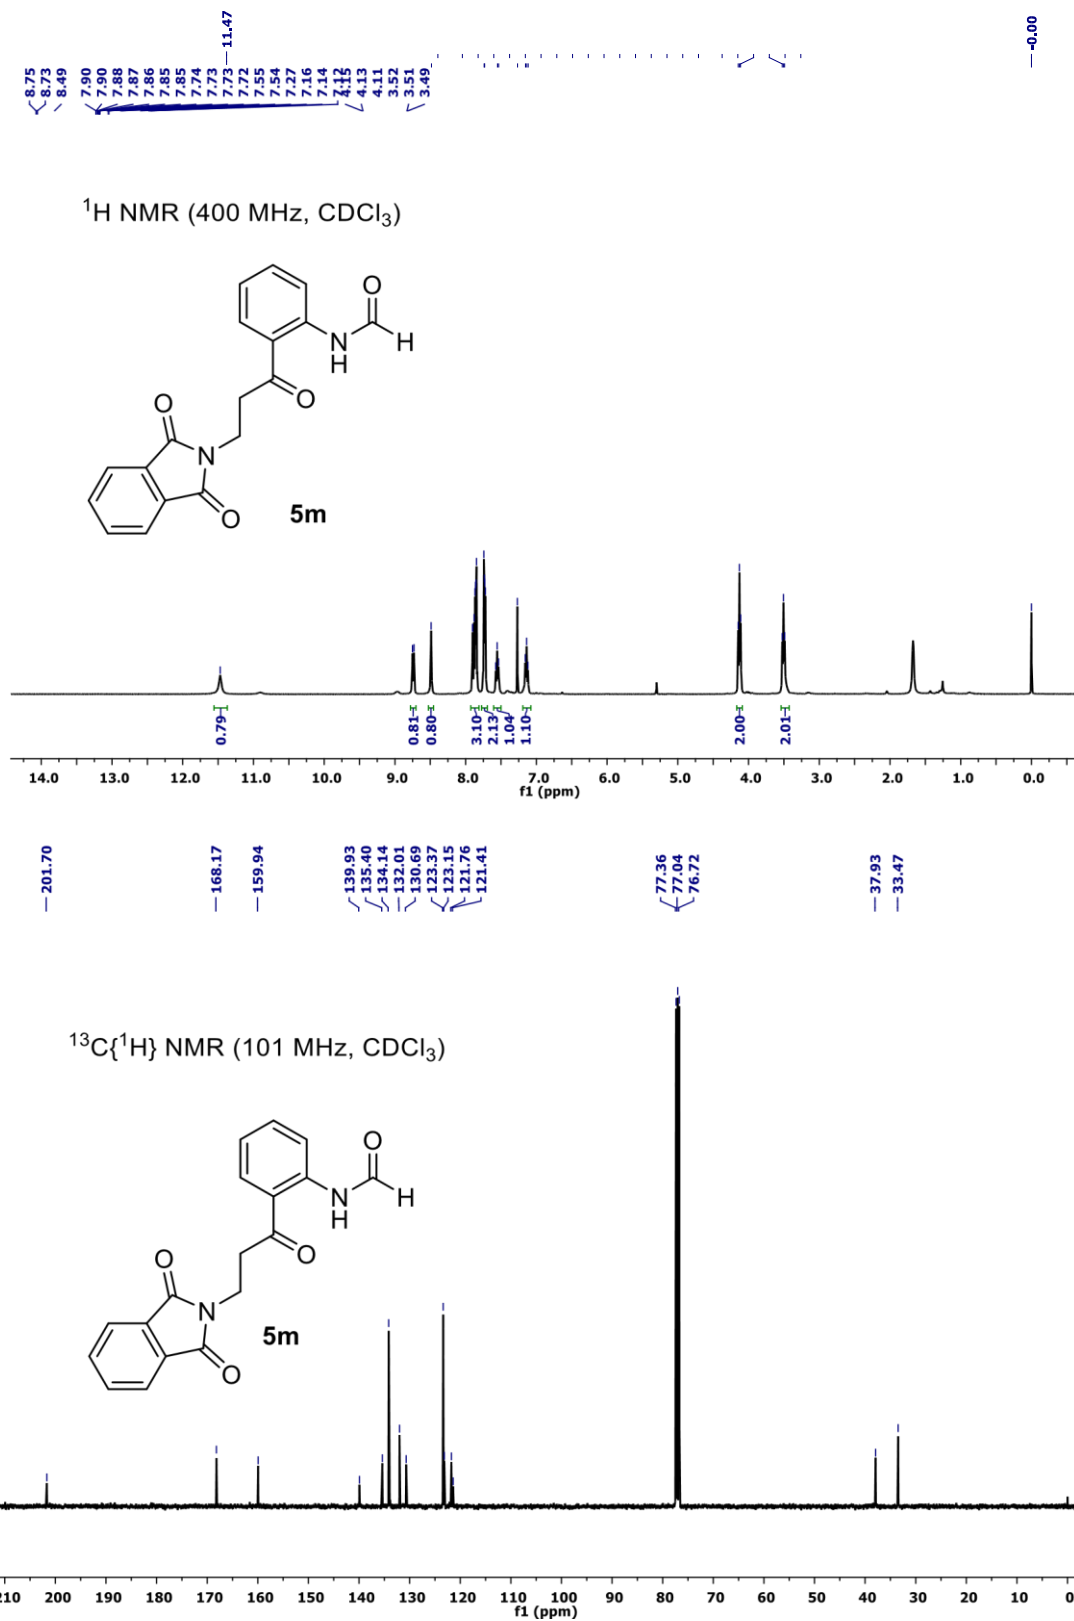

Fig S118. <sup>1</sup>H, <sup>13</sup>C {<sup>1</sup>H} NMR spectra of kynurenine derivative **5m**.

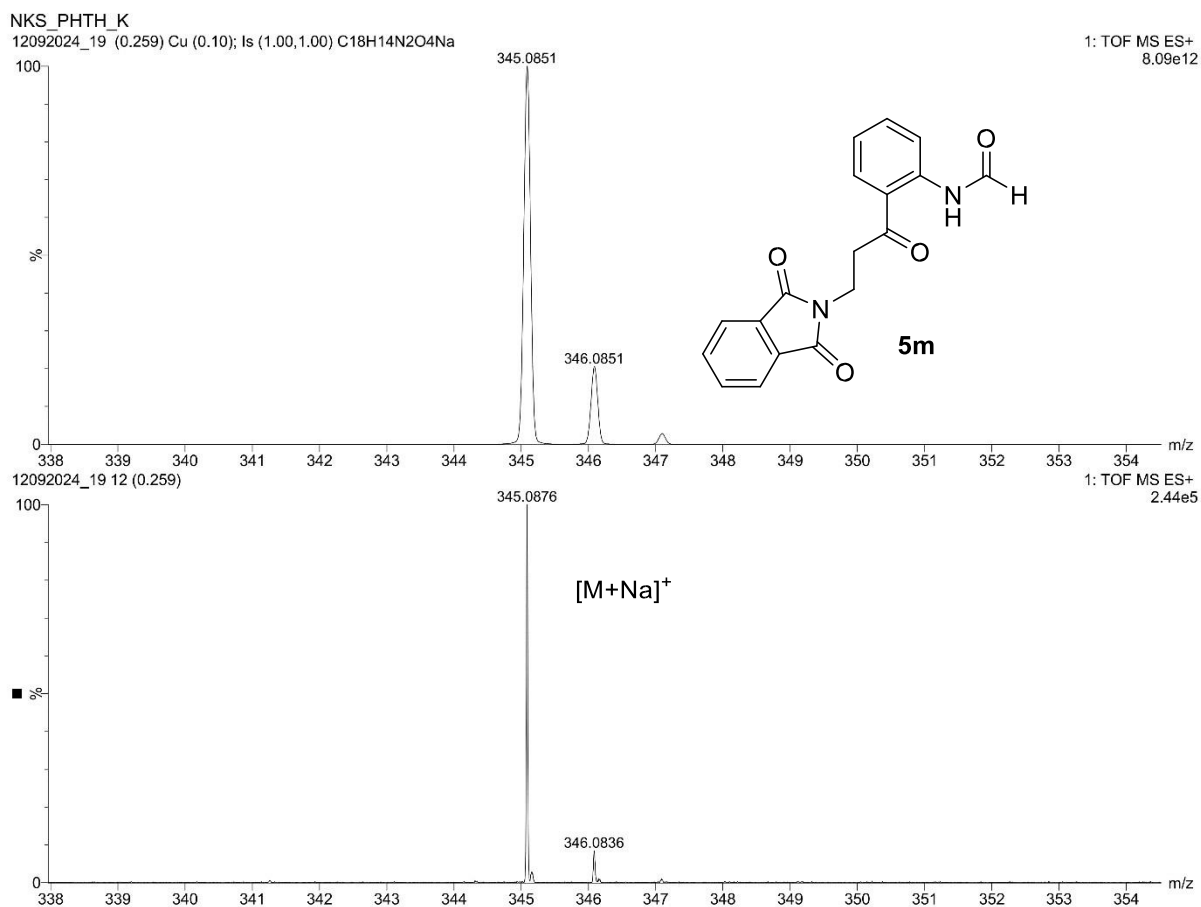

**Fig S119.** ESI-HRMS spectra of kynurenine derivative **5m**.

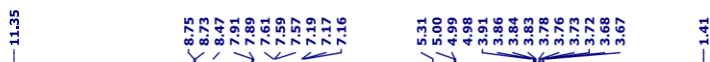

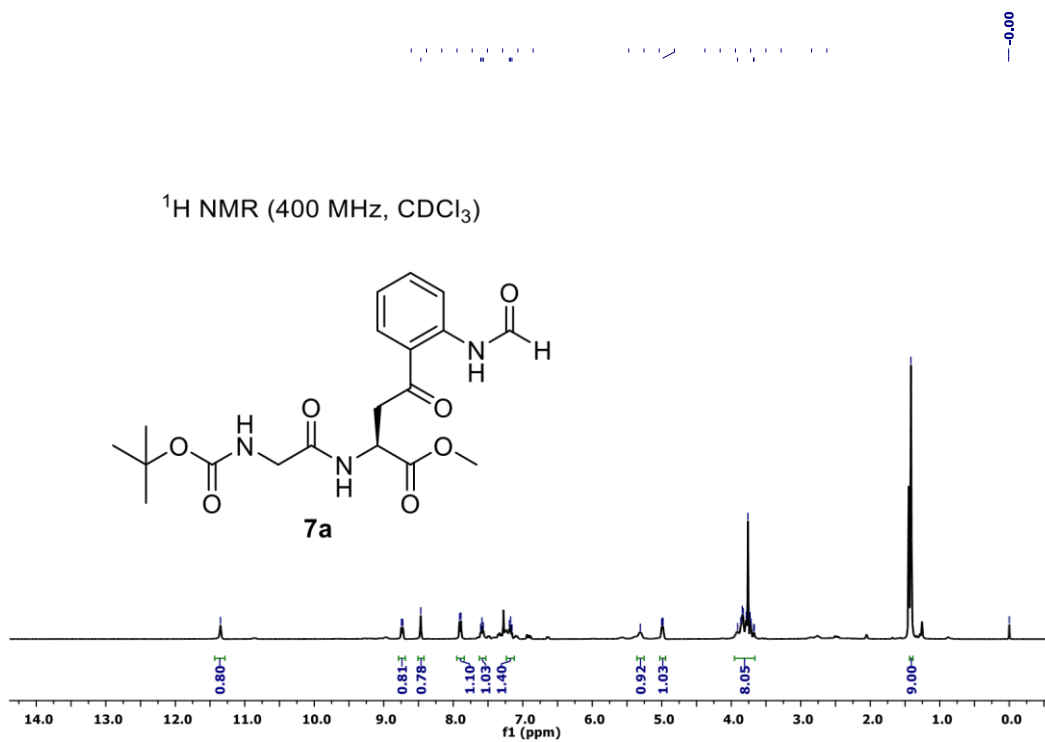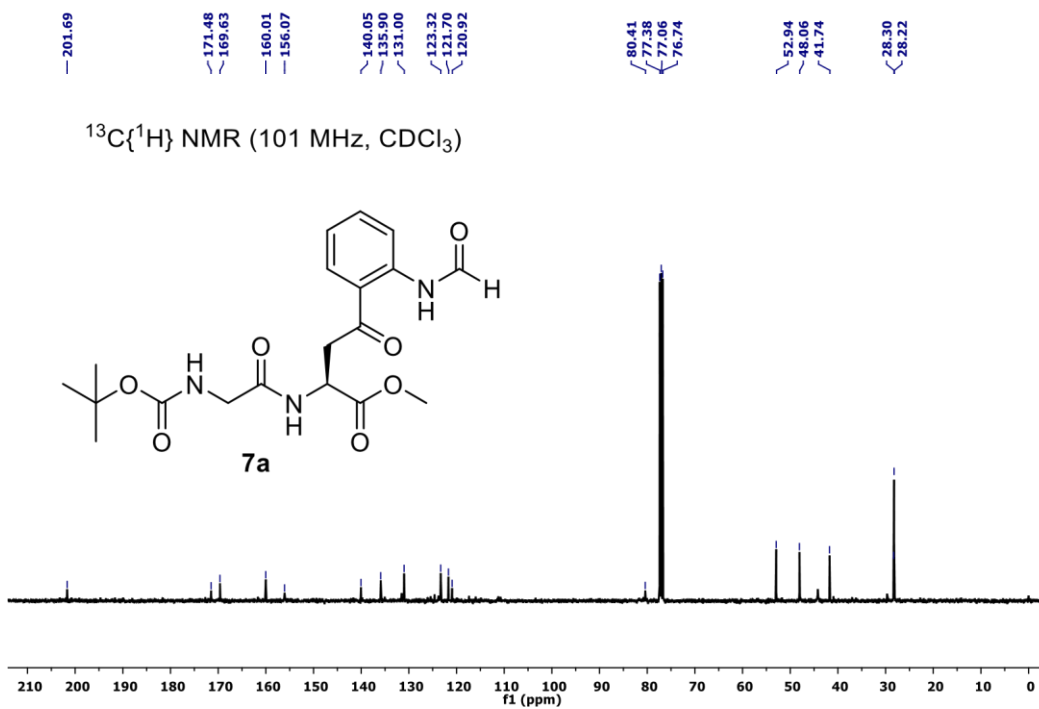

**Fig S120.**  $^1\text{H}$ ,  $^{13}\text{C}\{^1\text{H}\}$  NMR spectra of kynurenine-containing dipeptide **7a**.

NKS\_ARP\_62 R

09-May-2024  
23:54:46

XEVO-G2XSQTOF#NotSet

NKS\_09052024\_6 (0.053) Cu (0.05); Is (1.00,1.00) C<sub>19</sub>H<sub>25</sub>N<sub>3</sub>O<sub>7</sub>Na

1: TOF MS ES+  
7.90e12

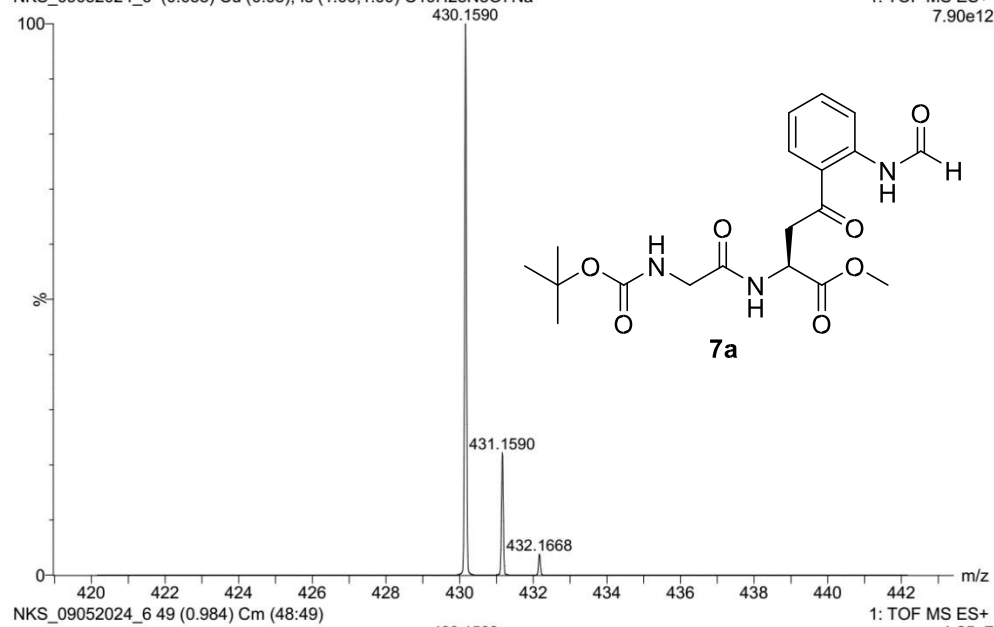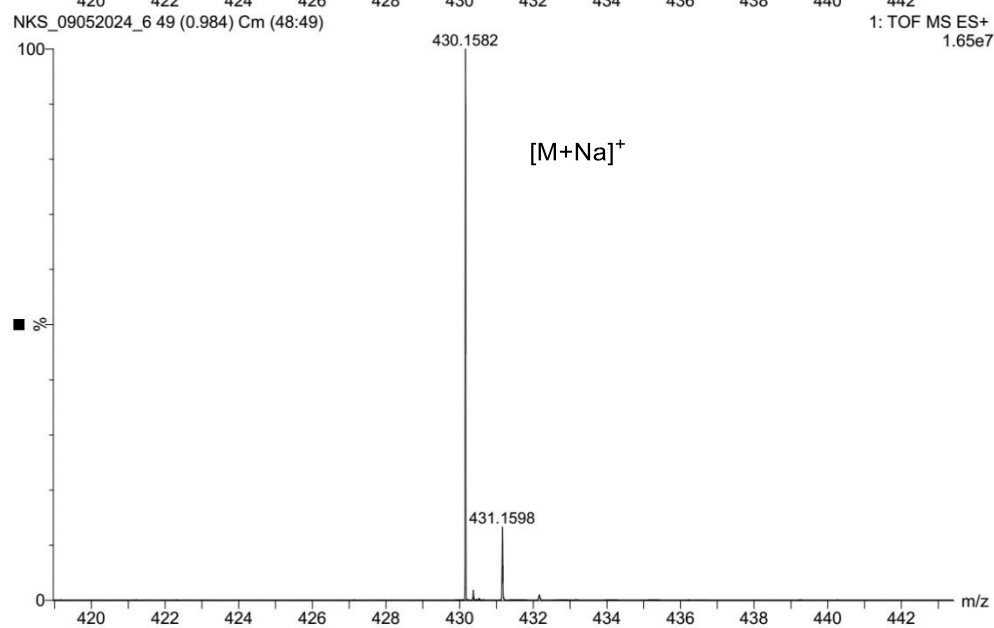

**Fig S121.** ESI-HRMS spectra of kynurenine-containing dipeptide **7a**.

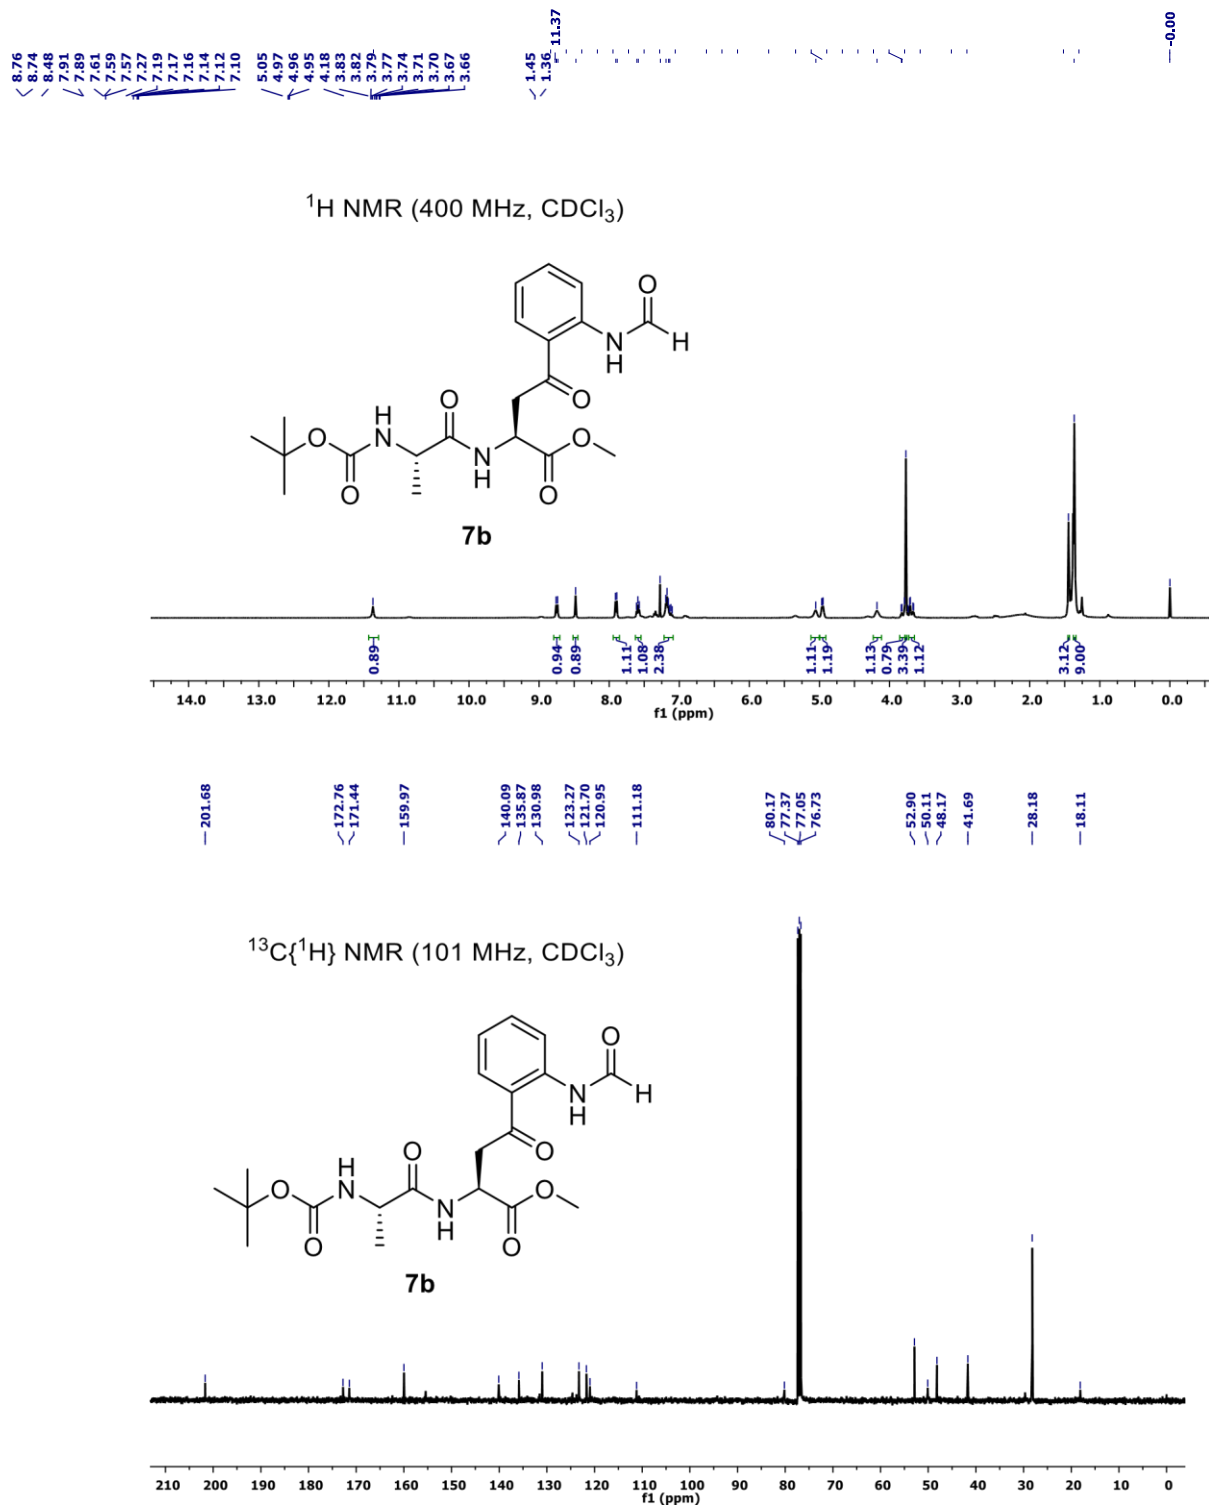

**Fig S122.** <sup>1</sup>H, <sup>13</sup>C {<sup>1</sup>H} NMR spectra of kynurenine-containing dipeptide **7b**.

NKS\_ARP\_68

21-May-2024  
21:28:12

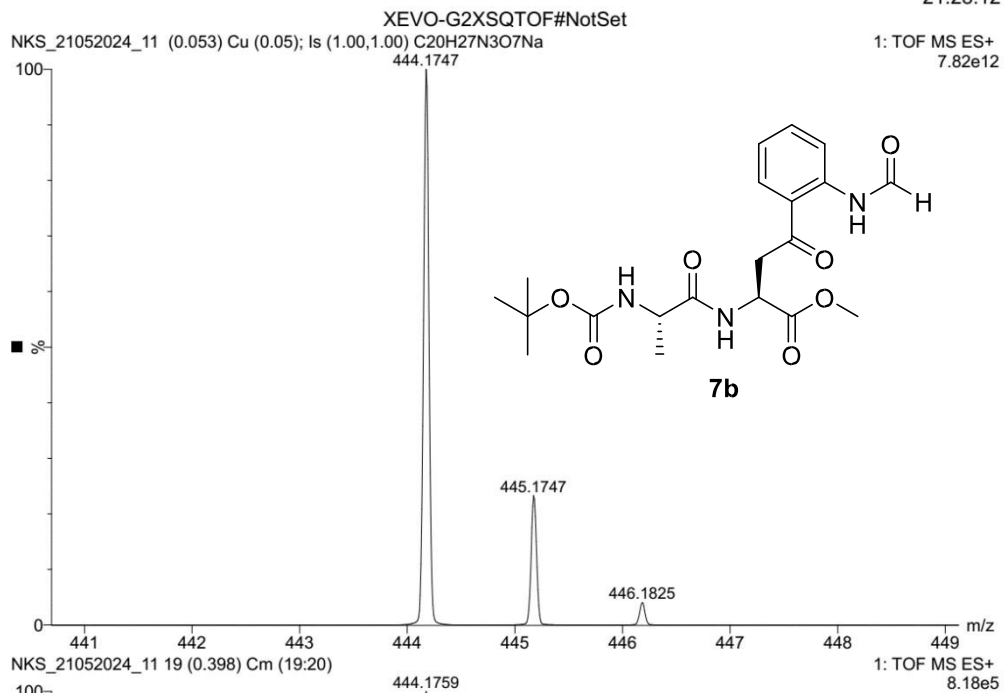

**Fig S123.** ESI-HRMS spectra of kynurenine-containing dipeptide **7b**.

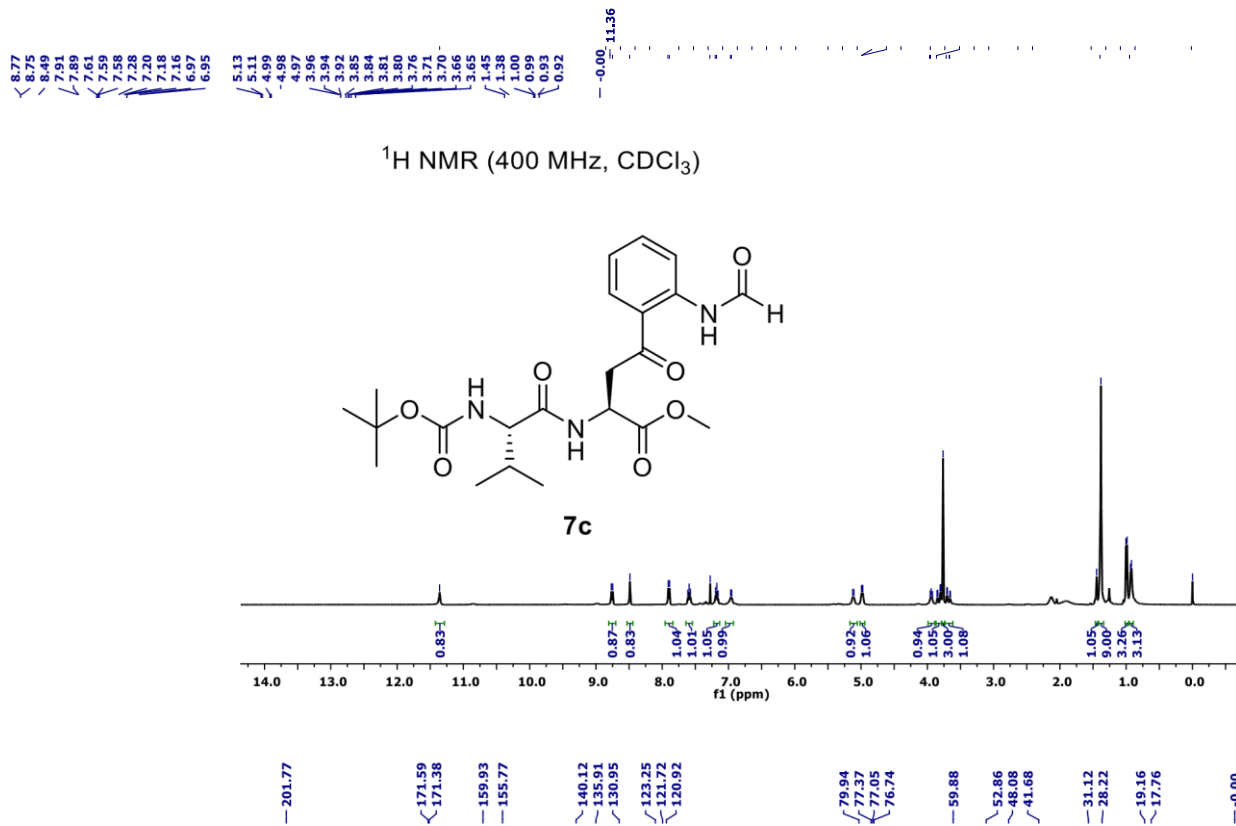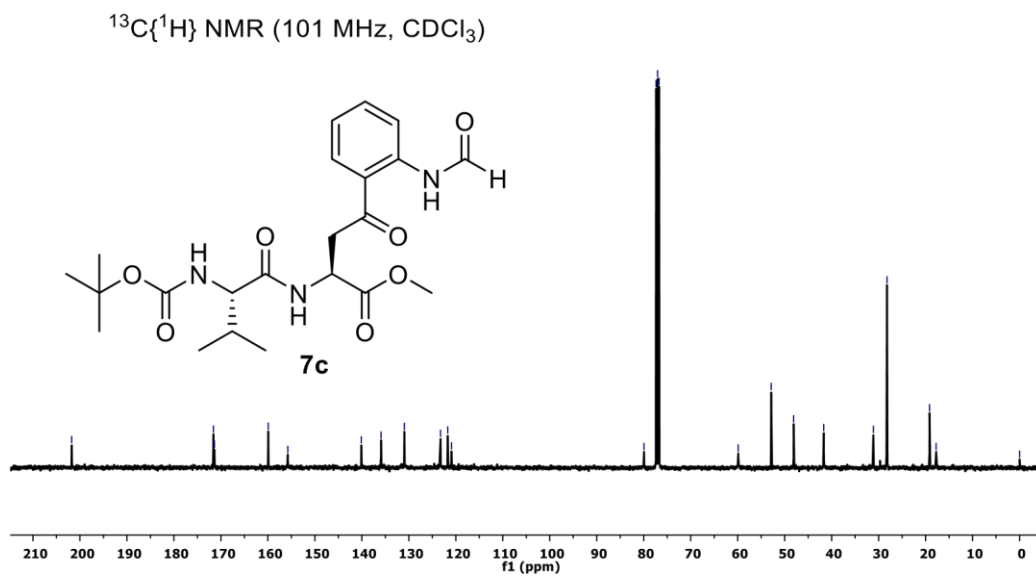

**Fig S124.** <sup>1</sup>H, <sup>13</sup>C {<sup>1</sup>H} NMR spectra of kynurenine-containing dipeptide **7c**.

ARP\_67

09-Mar-2024  
21:08:45

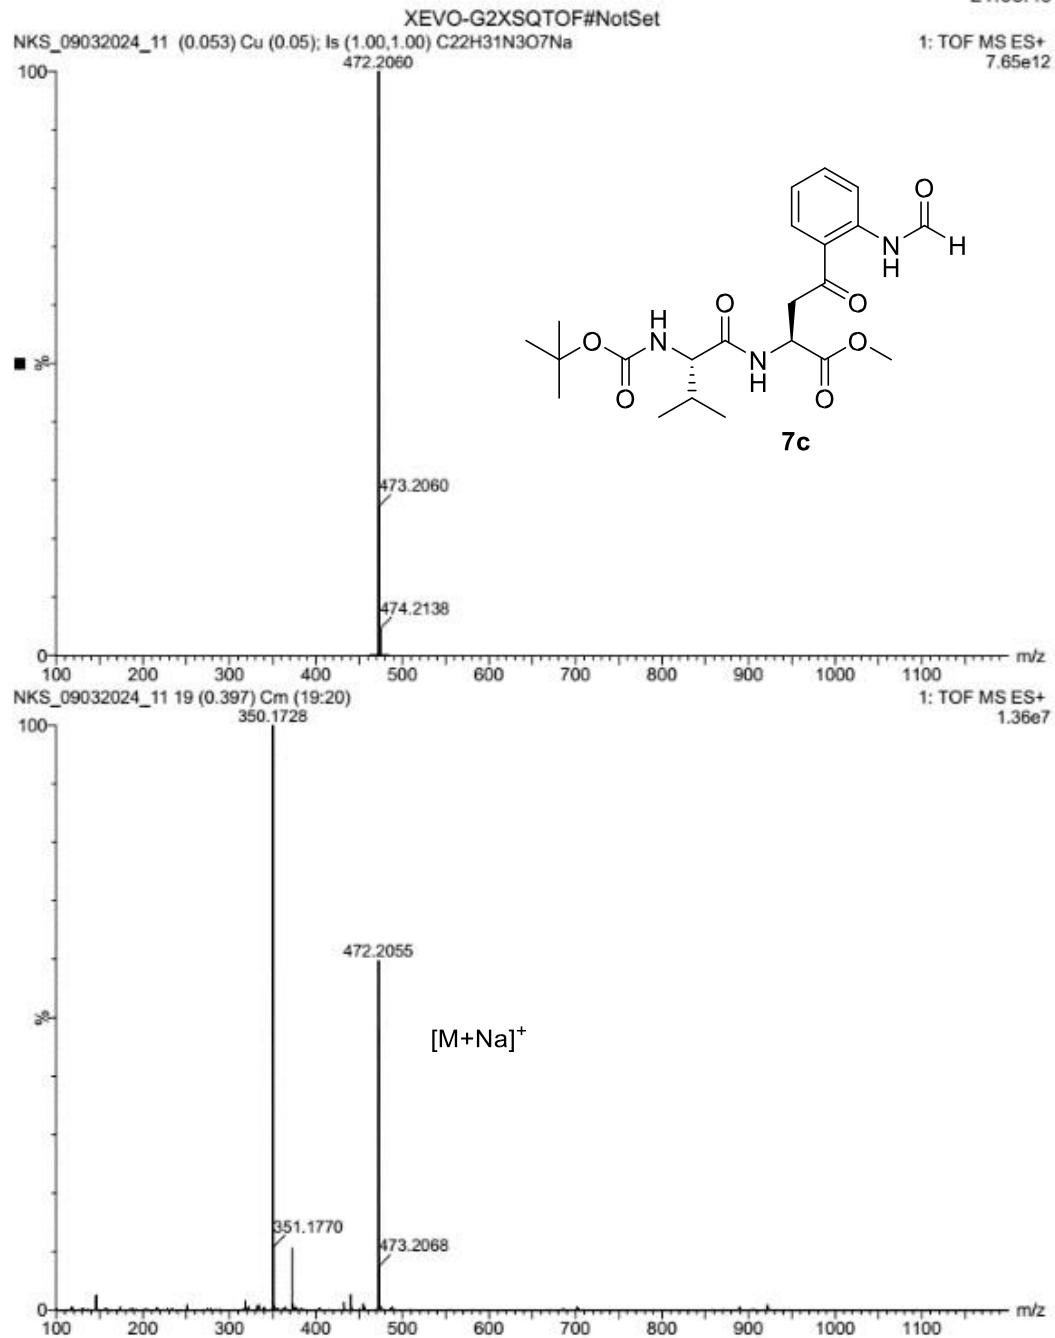

Fig S125. ESI-HRMS spectra of kynurenine-containing dipeptide **7c**.



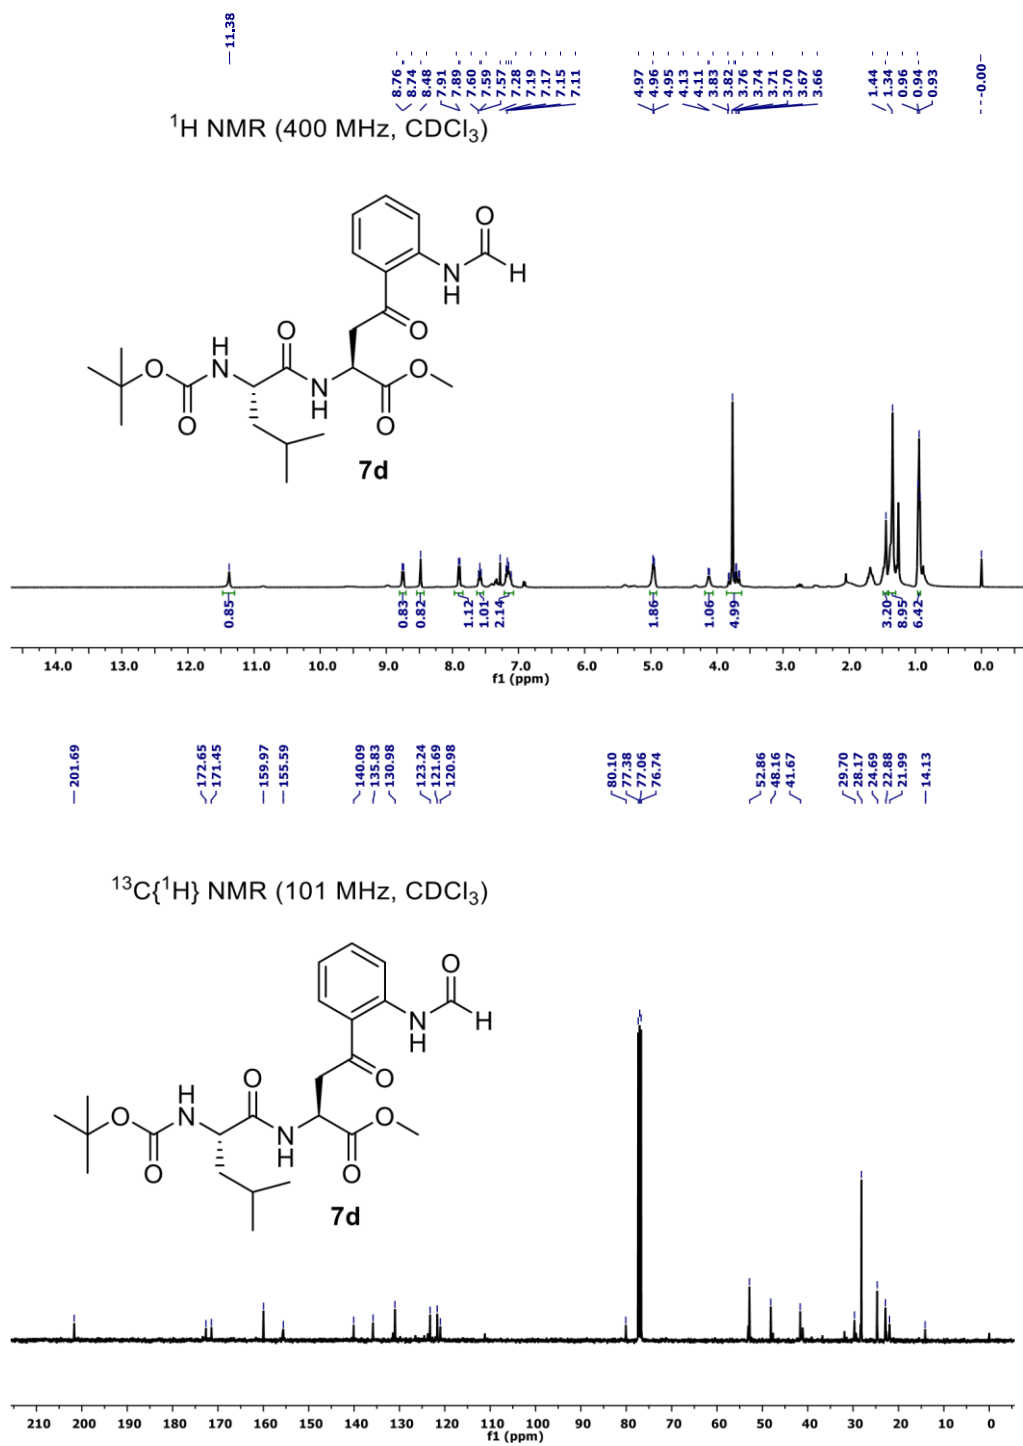

**Fig S126.** <sup>1</sup>H, <sup>13</sup>C {<sup>1</sup>H} NMR spectra of kynurenine-containing dipeptide **7d**.

NKS\_CKJ\_1381 P

14-May-2024  
21:35:42

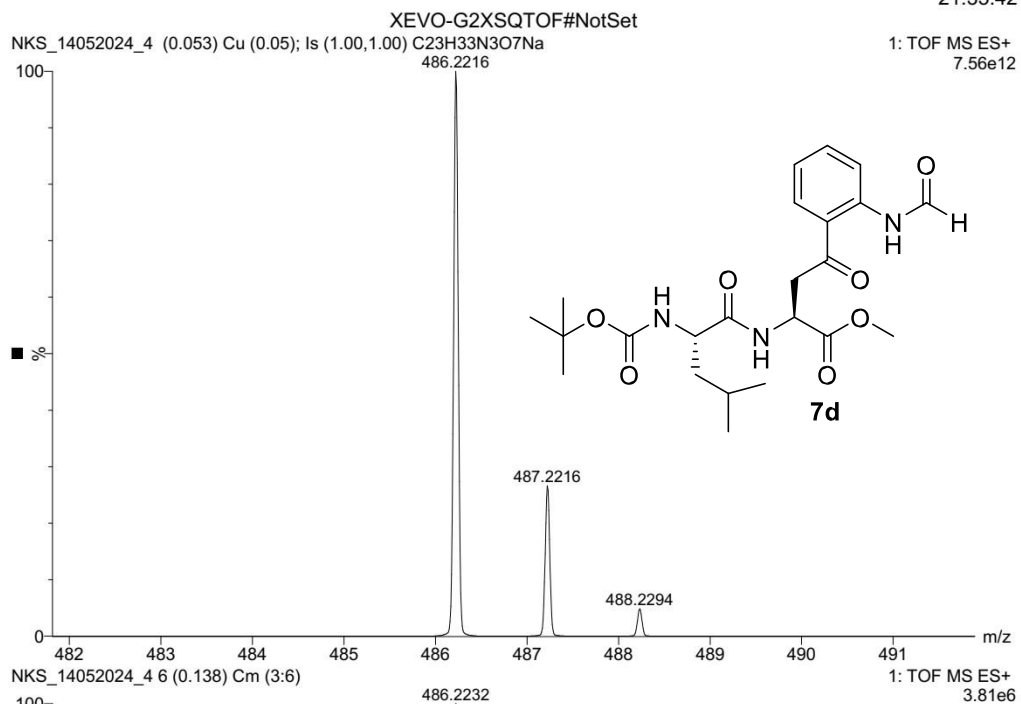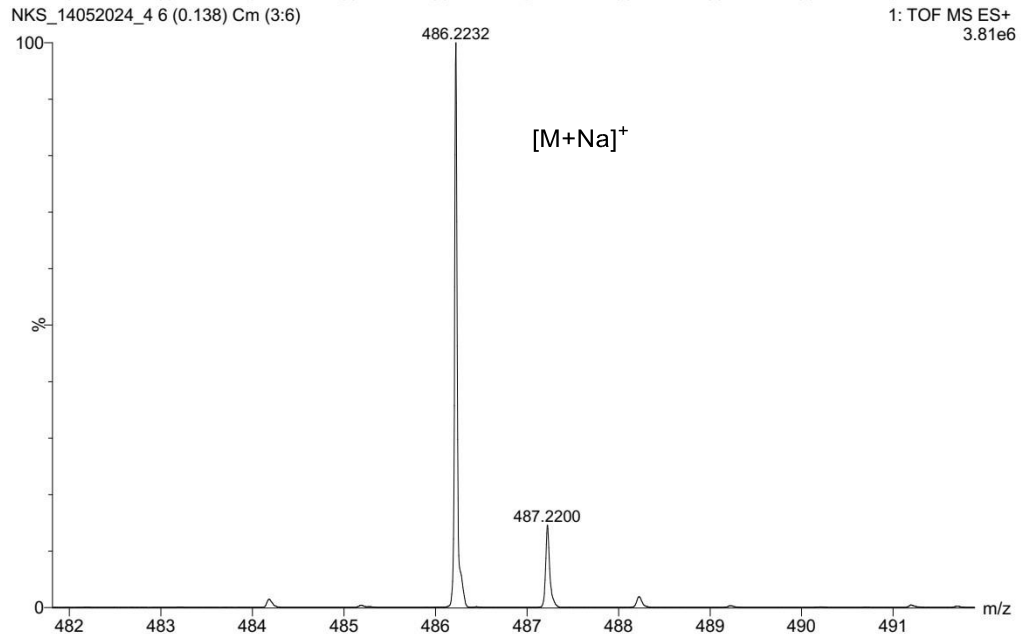

**Fig S127.** ESI-HRMS spectra of kynurenine-containing dipeptide **7d**.

— 11.36

8.77  
8.75  
8.49

7.91  
7.89  
7.61  
7.59  
7.57  
7.28  
7.19  
7.18  
7.02  
5.94  
5.93

5.00  
4.99  
4.98  
4.97  
4.96  
3.99  
3.84  
3.83  
3.79  
3.77  
3.74  
3.72  
3.71  
3.67  
1.88  
1.87  
1.86  
1.45  
1.38  
0.97  
0.91  
0.89  
0.88

— 0.00

$^1\text{H}$  NMR (400 MHz,  $\text{CDCl}_3$ )

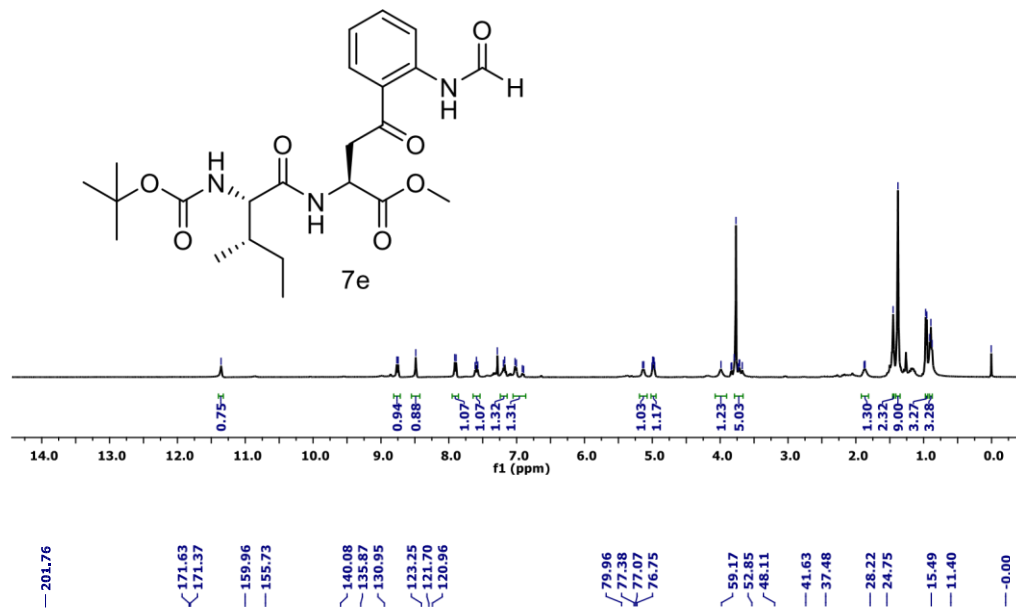

$^{13}\text{C}\{^1\text{H}\}$  NMR (101 MHz,  $\text{CDCl}_3$ )

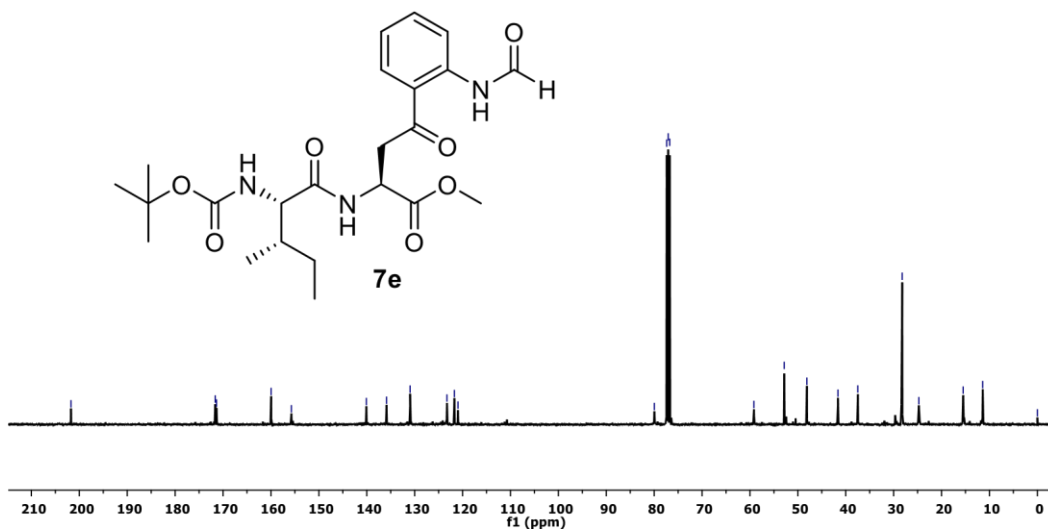

**Fig S128.**  $^1\text{H}$ ,  $^{13}\text{C}\{^1\text{H}\}$  NMR spectra of kynurenine-containing dipeptide **7e**.

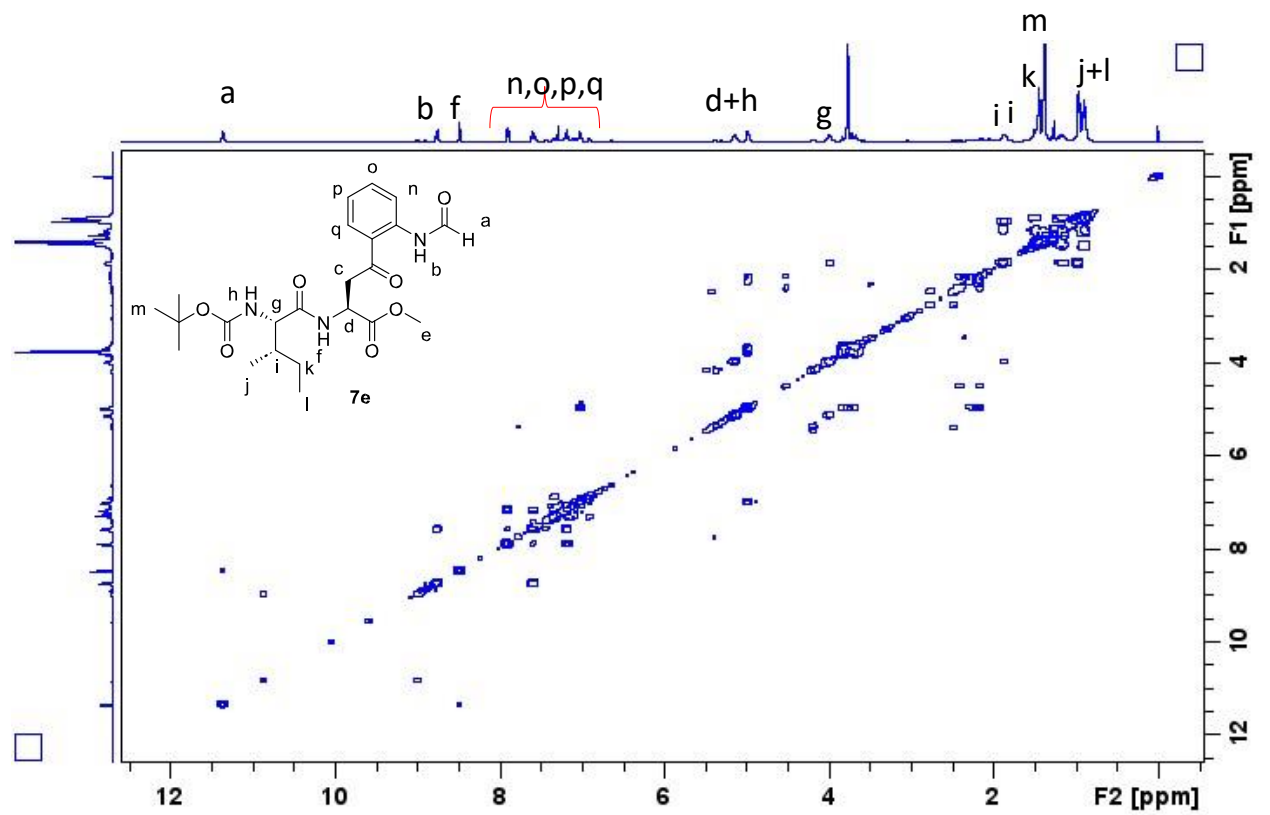

$^1\text{H}$ - $^1\text{H}$  COSY 2D NMR Spectra of Compound **7e**

e+c

**Fig S129.**  $^1\text{H}$ - $^1\text{H}$  COSY 2D NMR Spectra of Compound **7e**.

ARP\_54

09-Mar-2024  
23:02:16

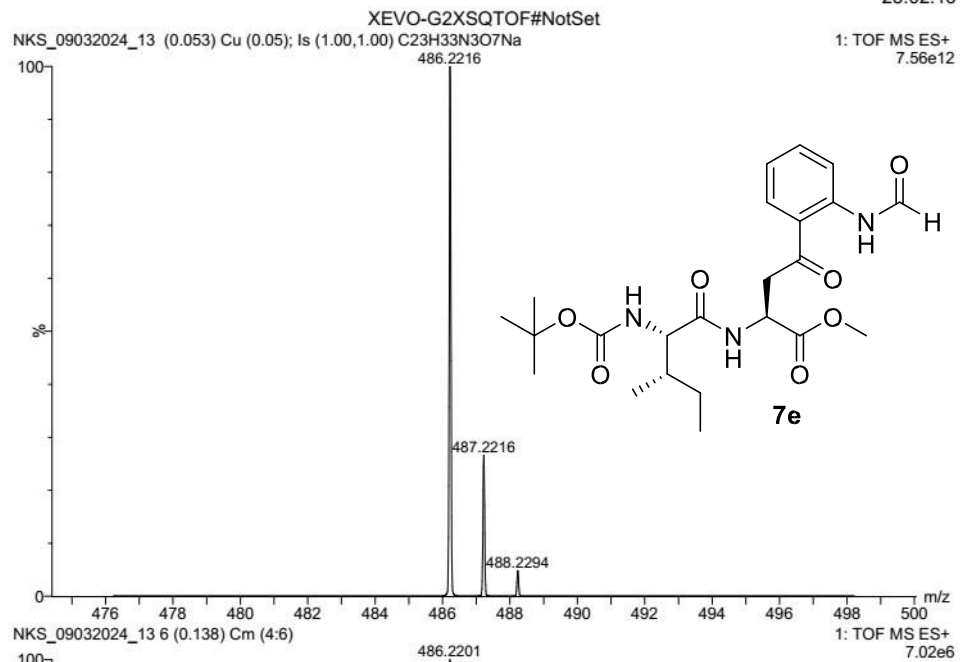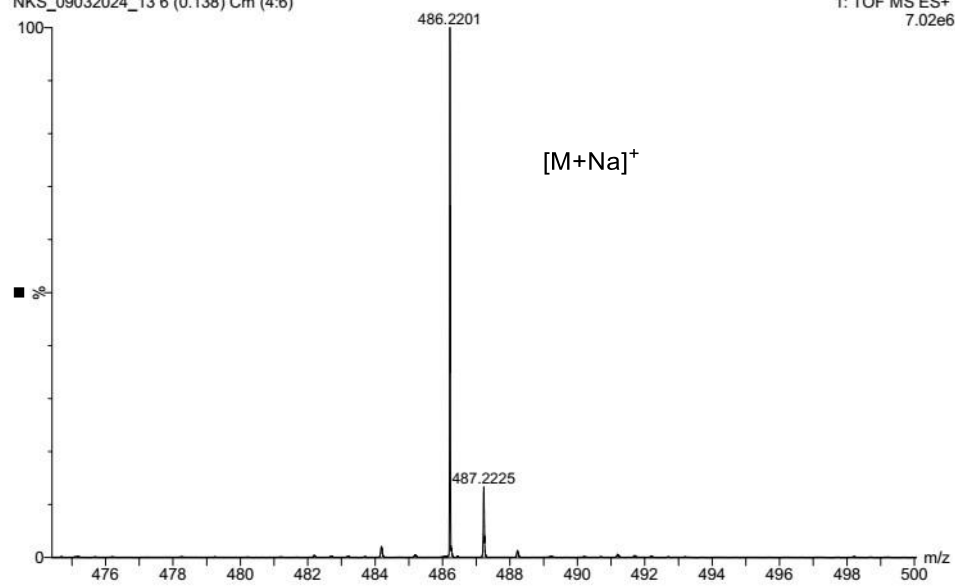

**Fig S130.** ESI-HRMS spectra of kynurenine-containing dipeptide **7e**.

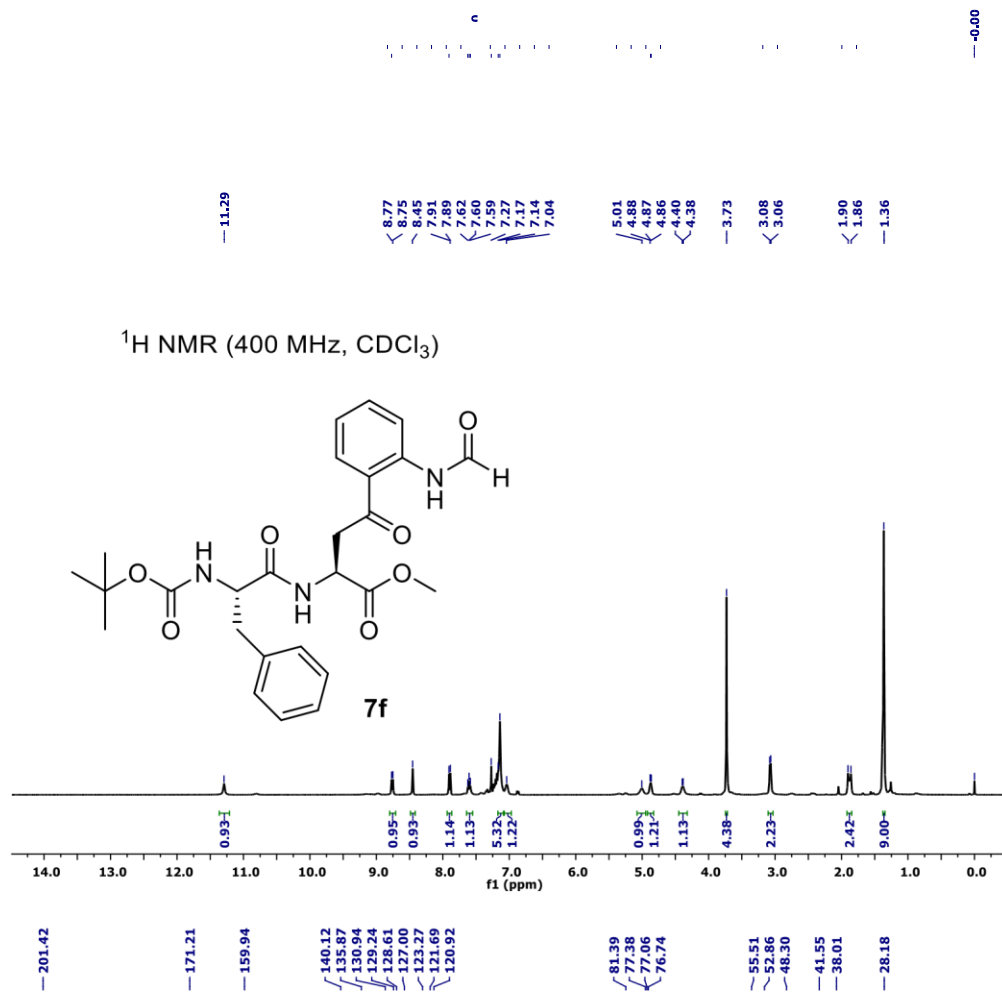

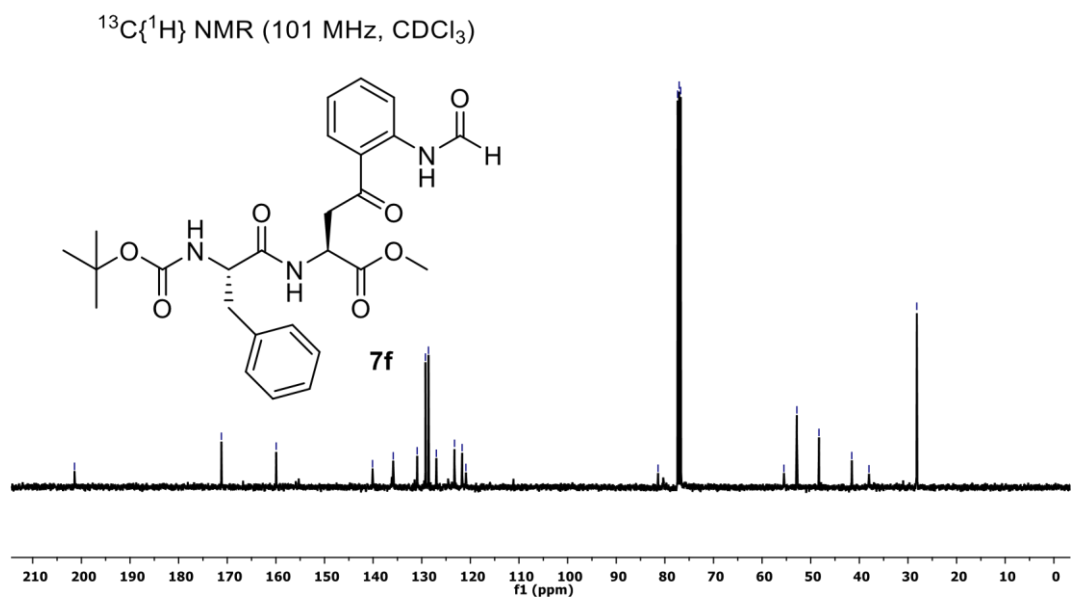

**Fig S131.**  $^1\text{H}$ ,  $^{13}\text{C}\{^1\text{H}\}$  NMR spectra of kynurenine-containing dipeptide **7f**.

NKS\_ARP-72

16-Apr-2024  
00:42:29

XEVO-G2XSQTOF#NotSet

NKS\_15042024\_7 (0.053) Cu (0.05); Is (1.00,1.00) C26H31N3O7Na

1: TOF MS ES+  
7.33e12

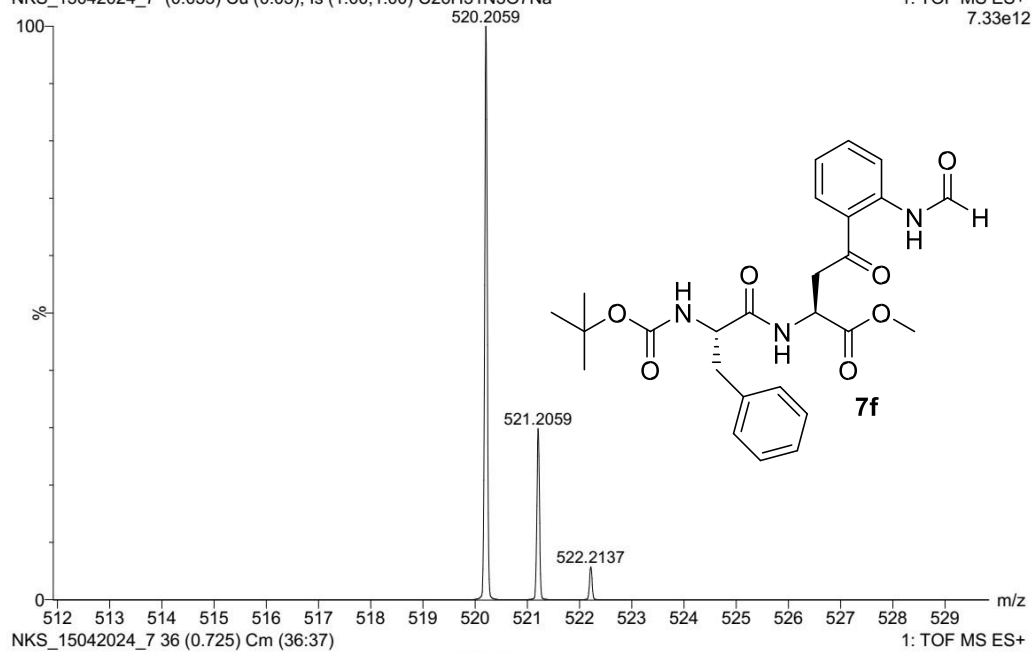

NKS\_15042024\_7 36 (0.725) Cm (36:37)

1: TOF MS ES+  
1.37e7

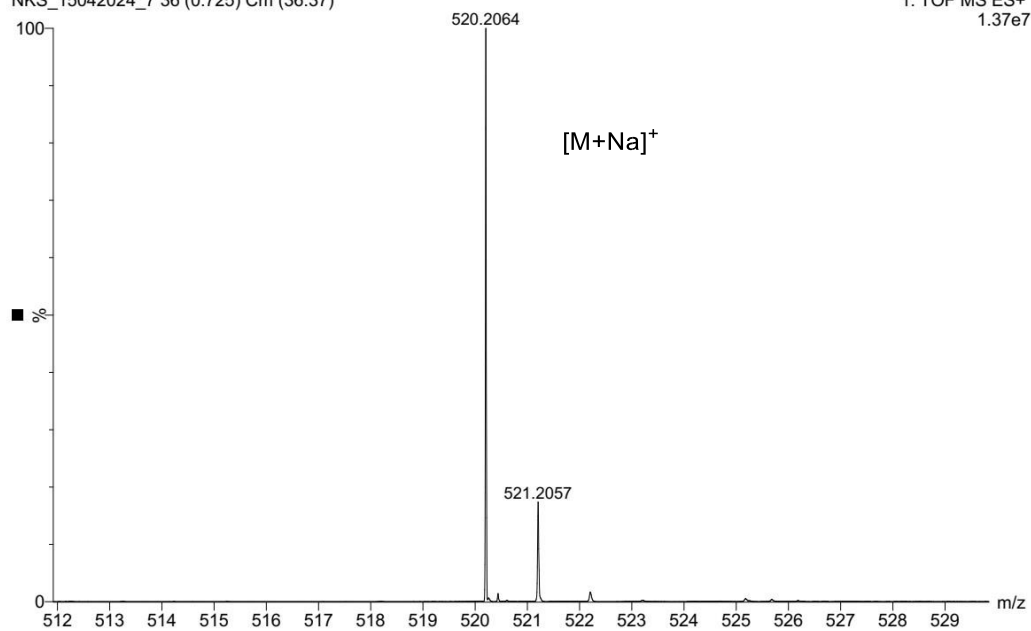



**Fig S132.** ESI-HRMS spectra of kynurenine-containing dipeptide **7f**.

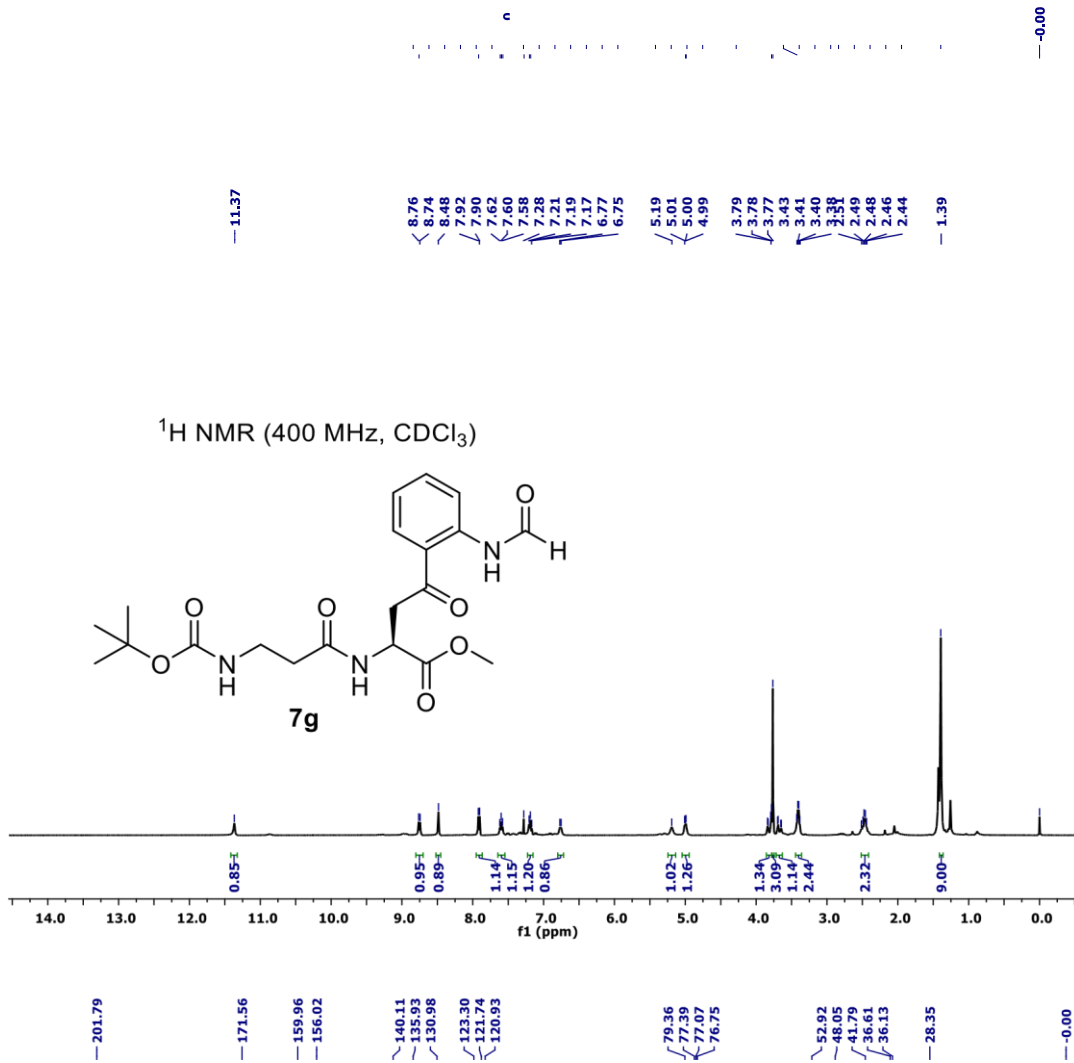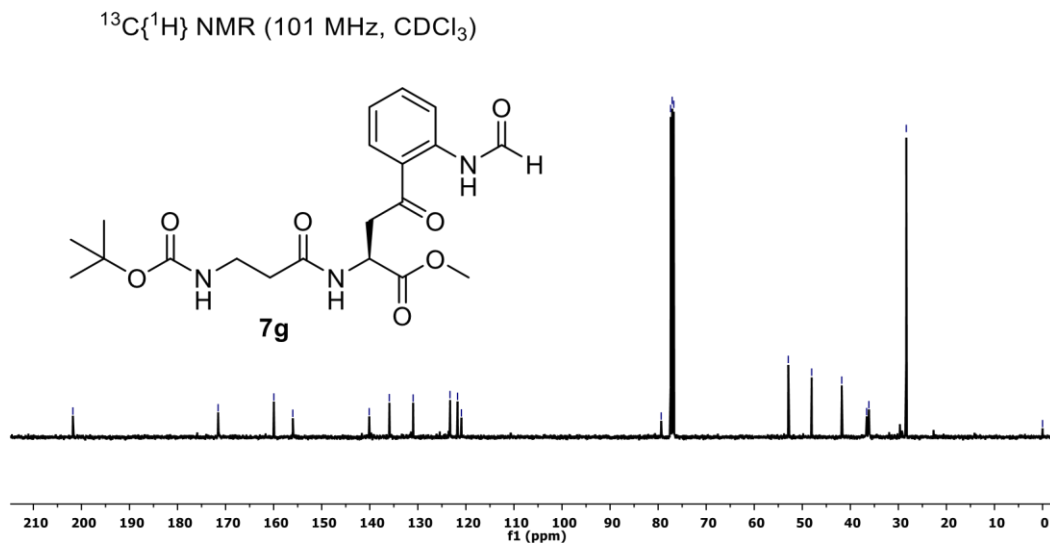

**Fig S133.**  $^1\text{H}$ ,  $^{13}\text{C}$   $\{^1\text{H}\}$  NMR spectra of kynurenine-containing dipeptide **7g**.

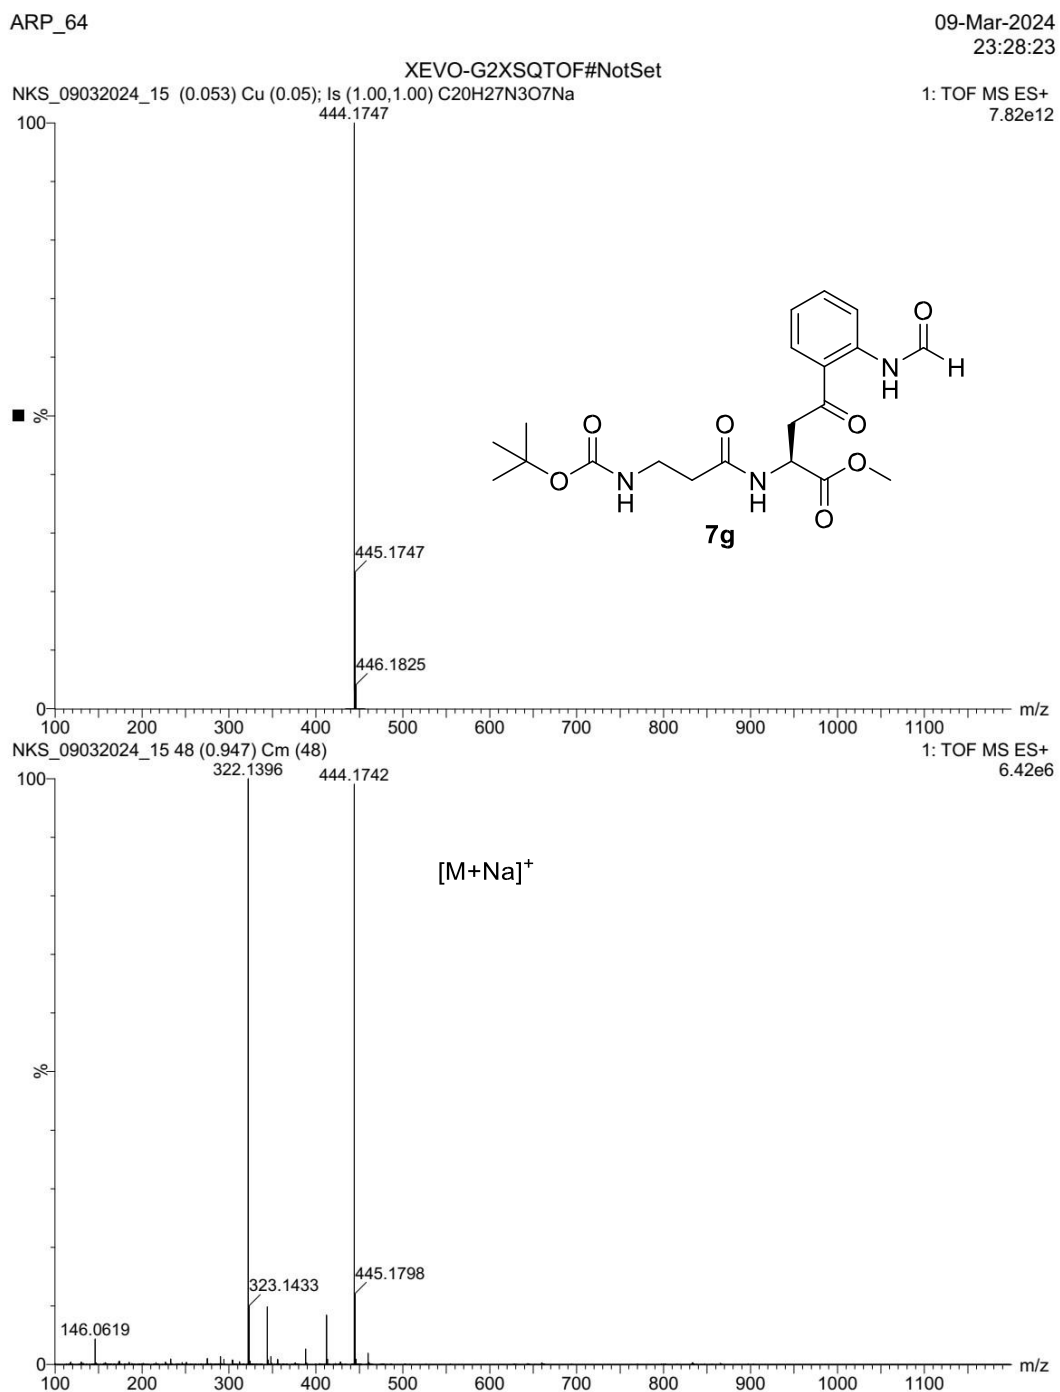

**Fig S134.** ESI-HRMS spectra of kynurenine-containing dipeptide **7g**.

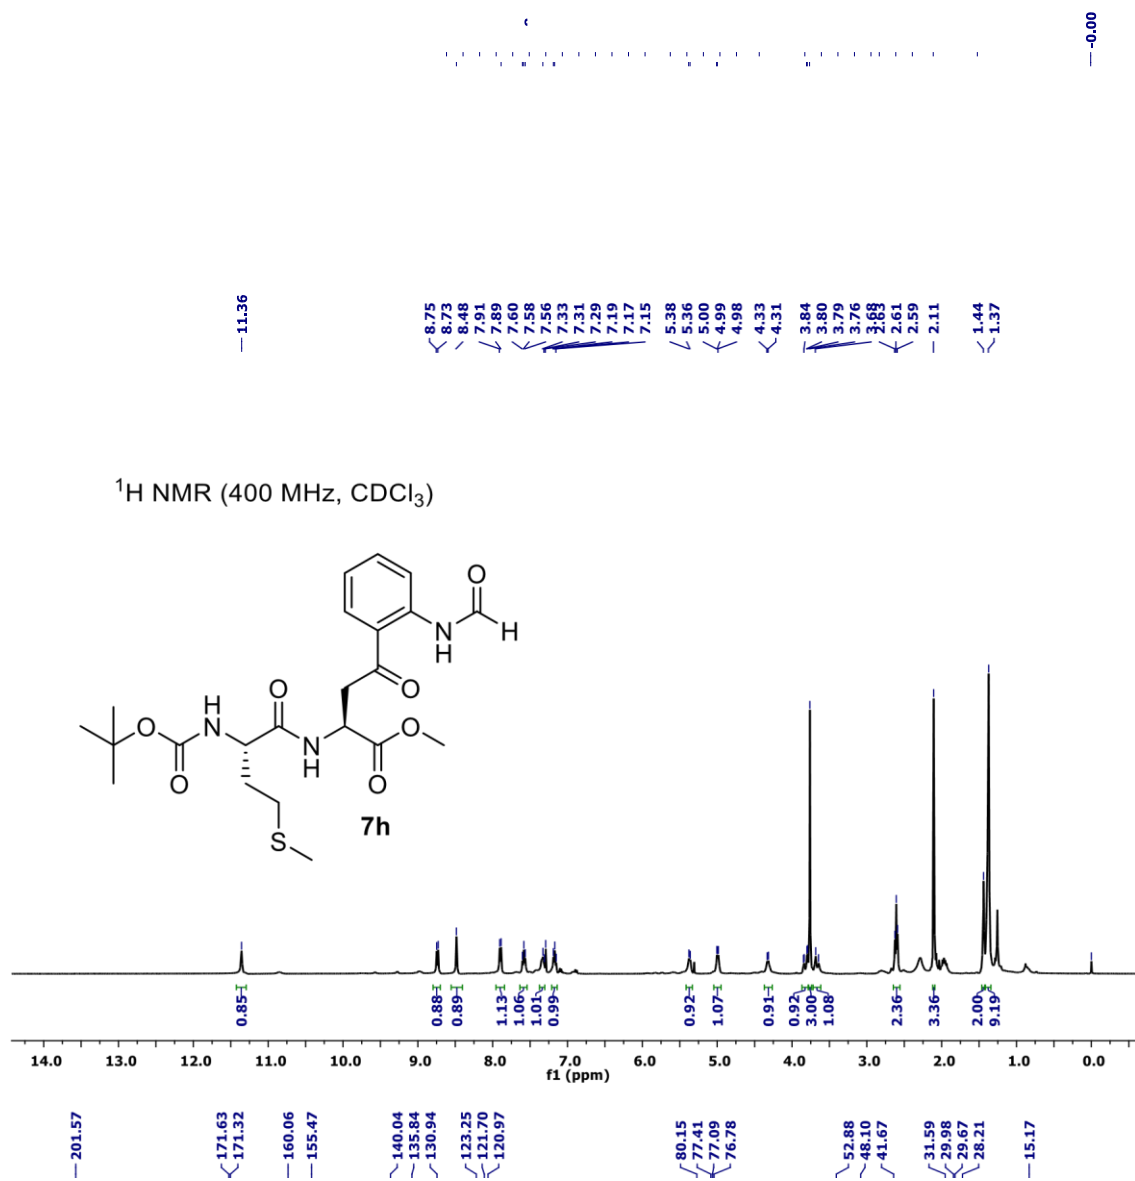

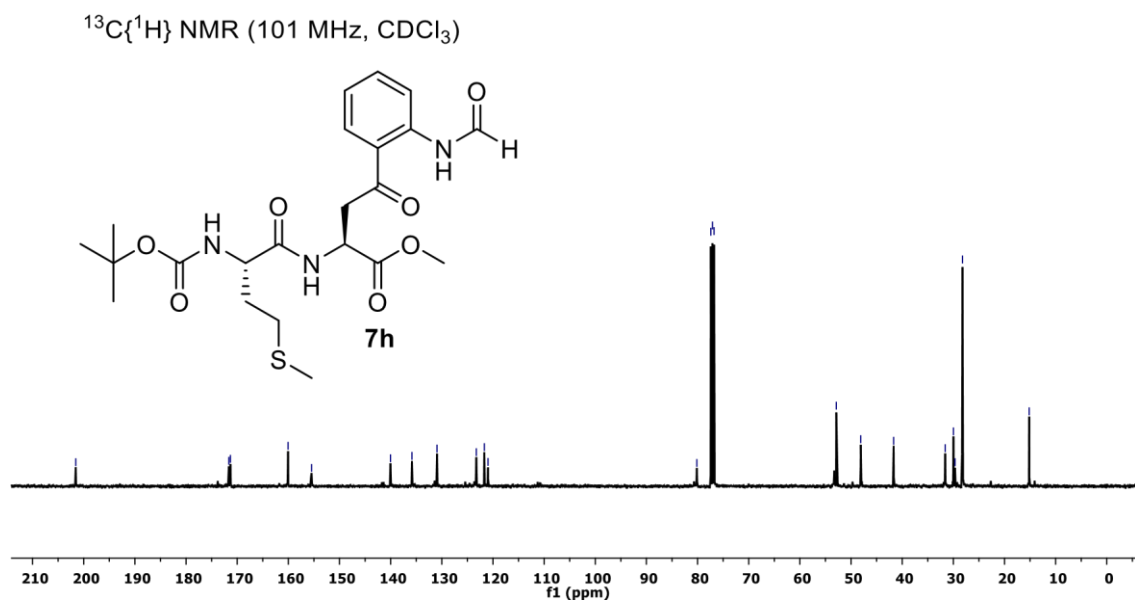

**Fig S135.**  $^1\text{H}$ ,  $^{13}\text{C}$   $\{^1\text{H}\}$  NMR spectra of kynurenine-containing dipeptide **7h**.

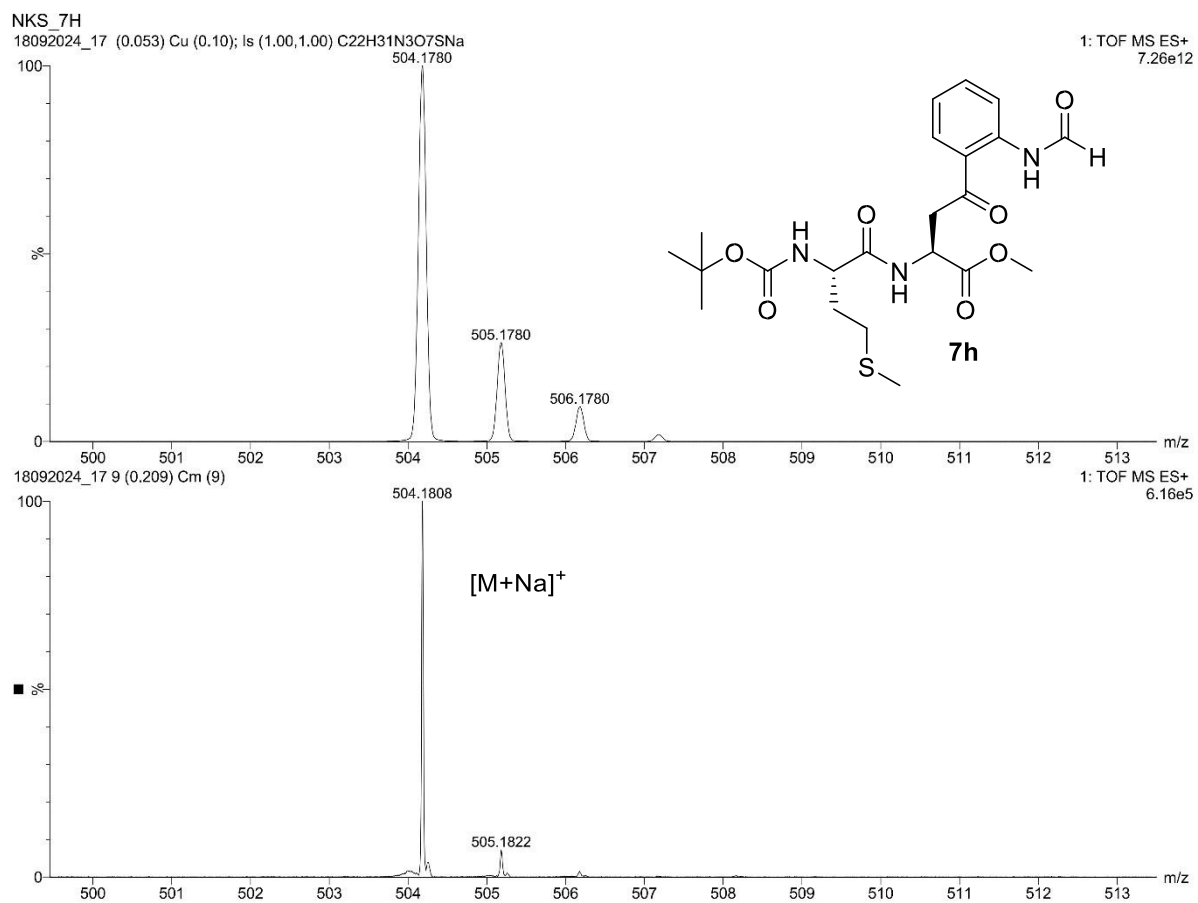

**Fig S136.** ESI-HRMS spectra of kynurenine-containing dipeptide **7h**.

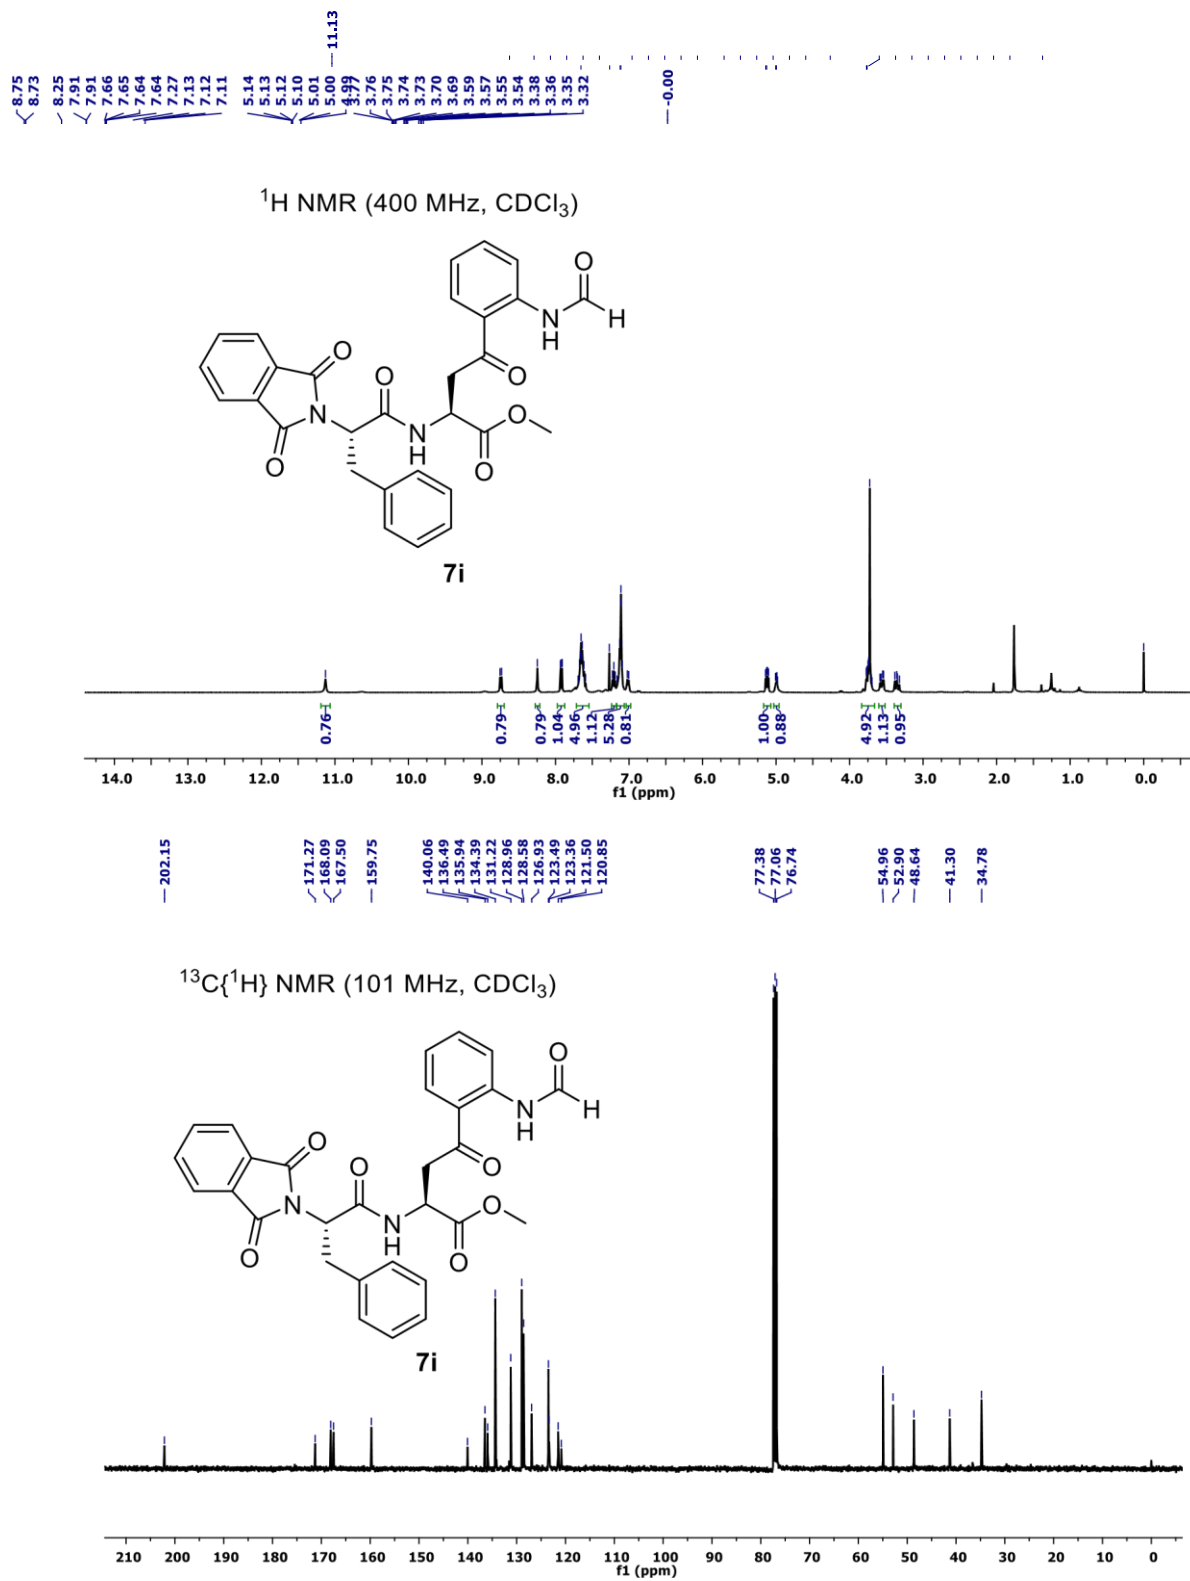

**Fig S137.** <sup>1</sup>H, <sup>13</sup>C {<sup>1</sup>H} NMR spectra of kynurenine-containing dipeptide **7i**.

3. NMR and Mass Spectra of *N*-phenyl tryptophan (9) and *N*-troponyl tryptophan (12)

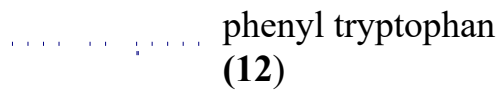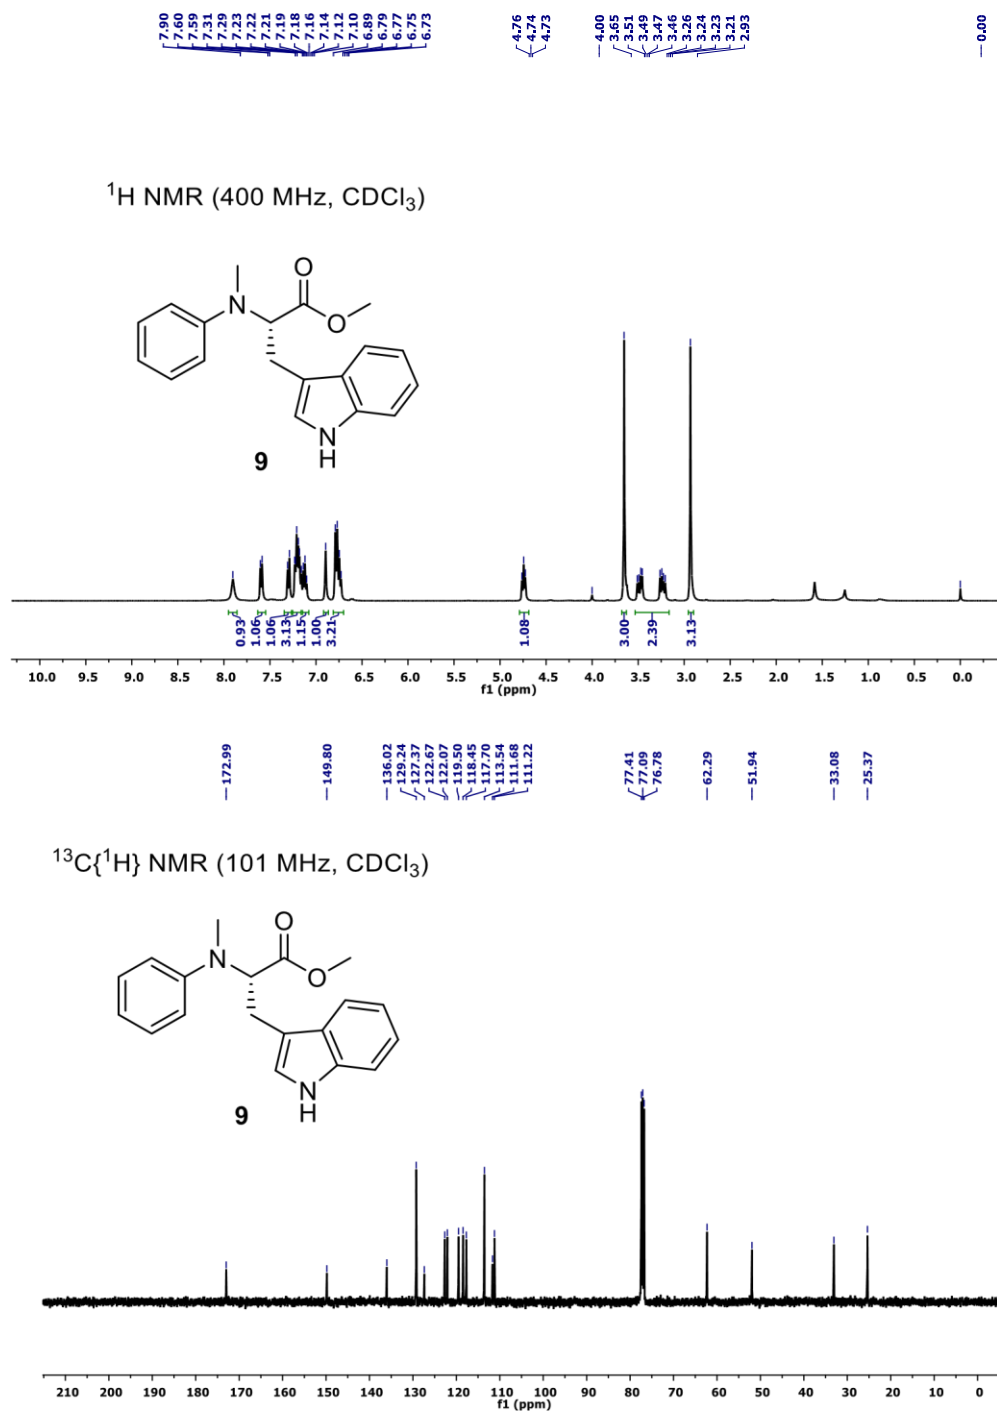

Fig S138. <sup>1</sup>H, <sup>13</sup>C {<sup>1</sup>H} NMR spectra of *N*-phenyl tryptophan **9**.



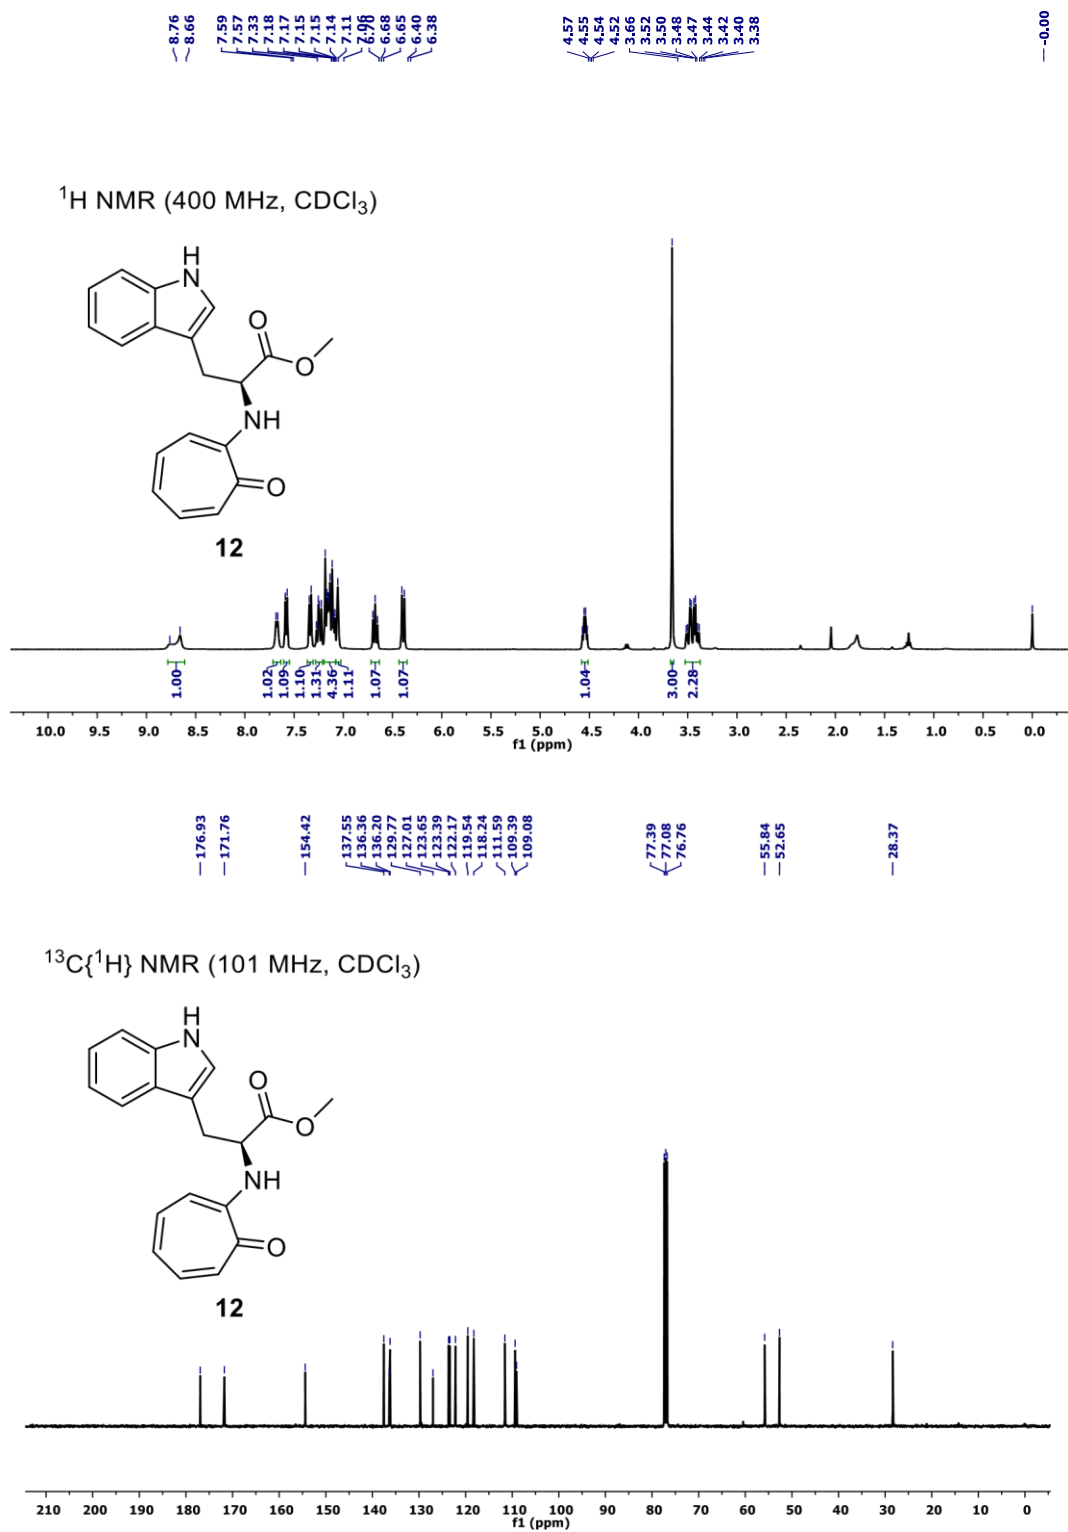

**Fig S139.** <sup>1</sup>H, <sup>13</sup>C {<sup>1</sup>H} NMR spectra of *N*-troponyl tryptophan **12**.

NKS\_CKJ\_1425

05-May-2024  
22:03:40

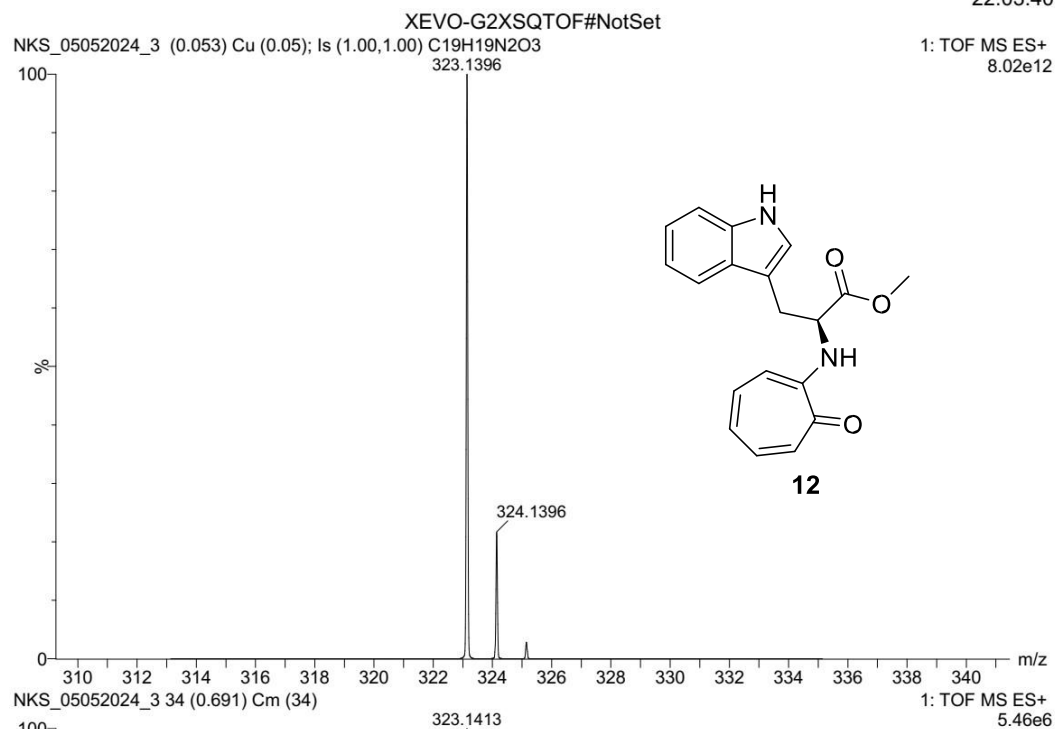

**Fig S140.** ESI-HRMS spectra of *N*-troponyl tryptophan **12**.

#### 4. NMR and Mass Spectra of Spirocyclic Motifs (8/10/13)

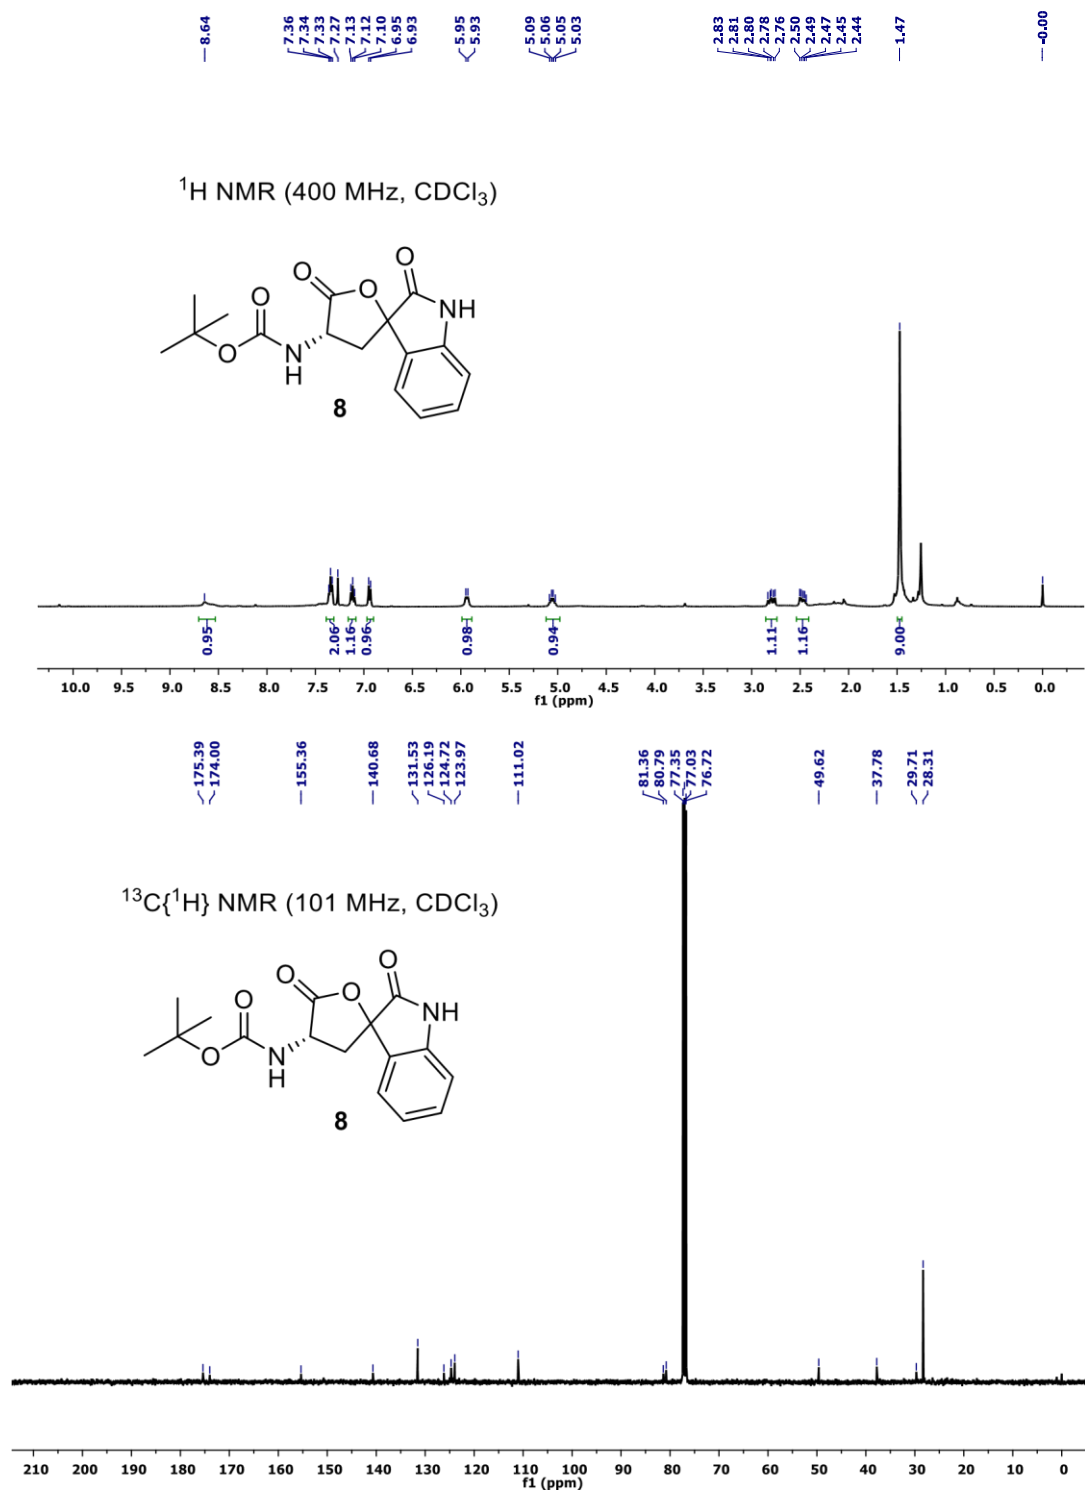

Fig S141. <sup>1</sup>H, <sup>13</sup>C {<sup>1</sup>H} NMR spectra of oxaspirooxindole **8**.

NKS\_ARP\_66

03-Mar-2024  
01:42:09

XEVO-G2XSQTOF#NotSet  
NKS\_02032024\_3 (0.053) Cu (0.05); Is (1.00,1.00) C<sub>16</sub>H<sub>18</sub>N<sub>2</sub>O<sub>5</sub>Na

1: TOF MS ES+  
8.24e12

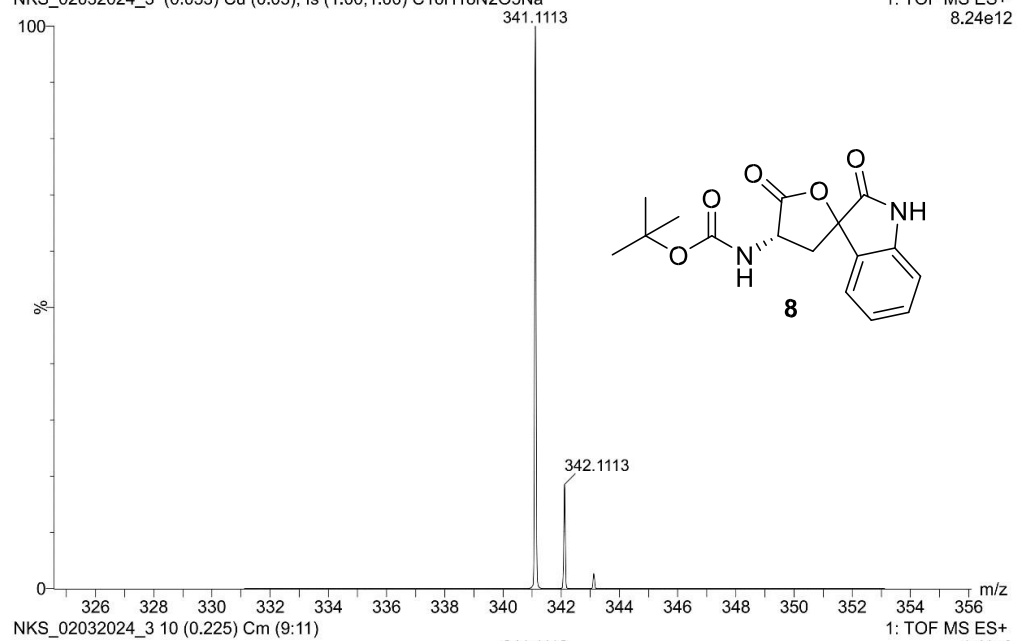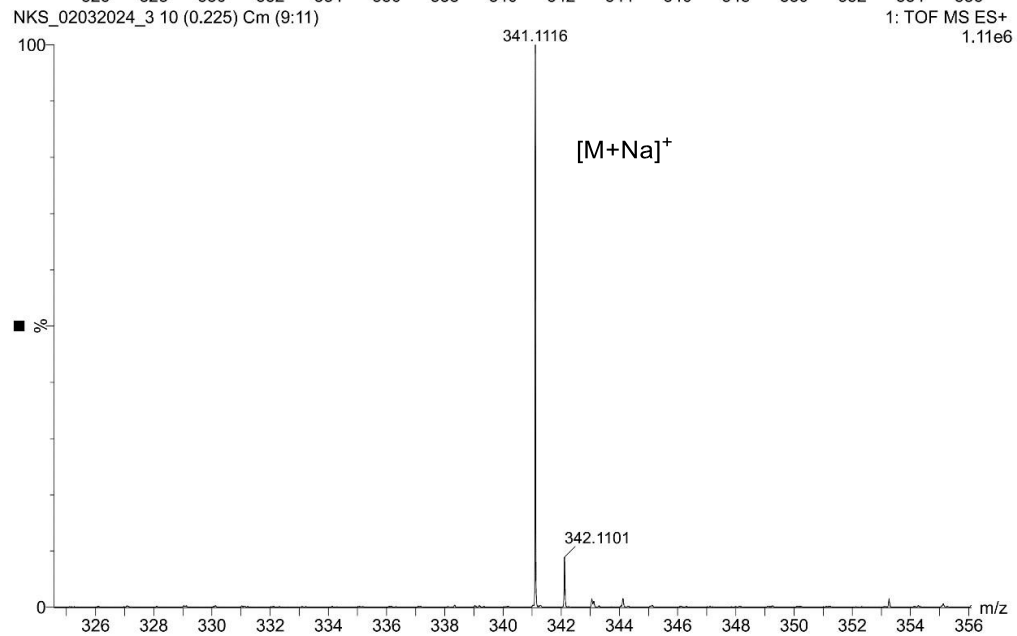

**Fig S142.** ESI-HRMS spectra of oxaspirooxindole **8**.

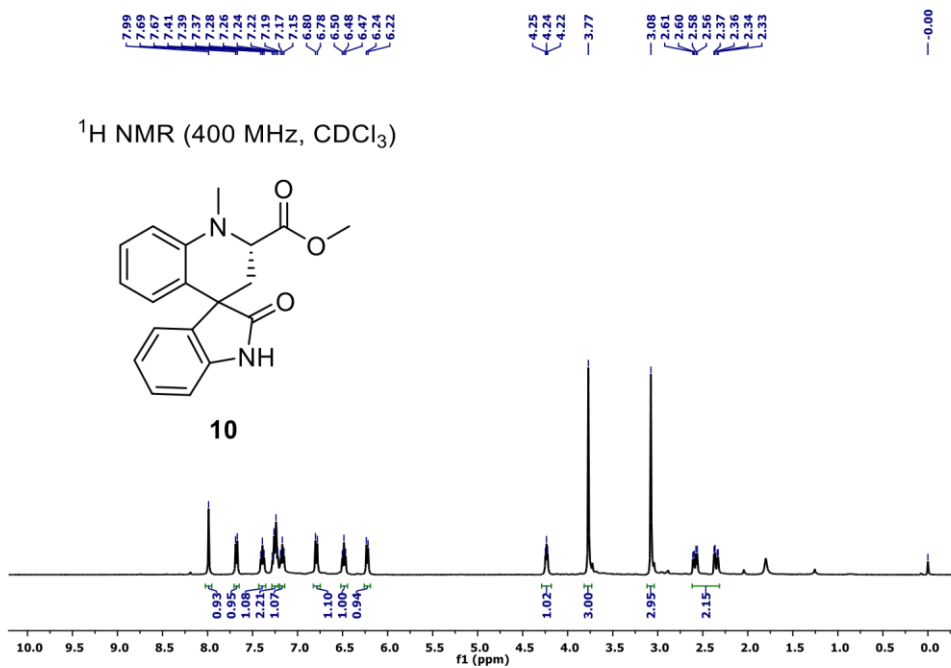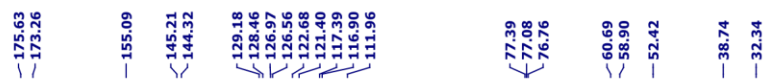

**Fig S143.** <sup>1</sup>H, <sup>13</sup>C {<sup>1</sup>H} NMR spectra of spirofused tetrahydroquinoline-oxindole **10**.

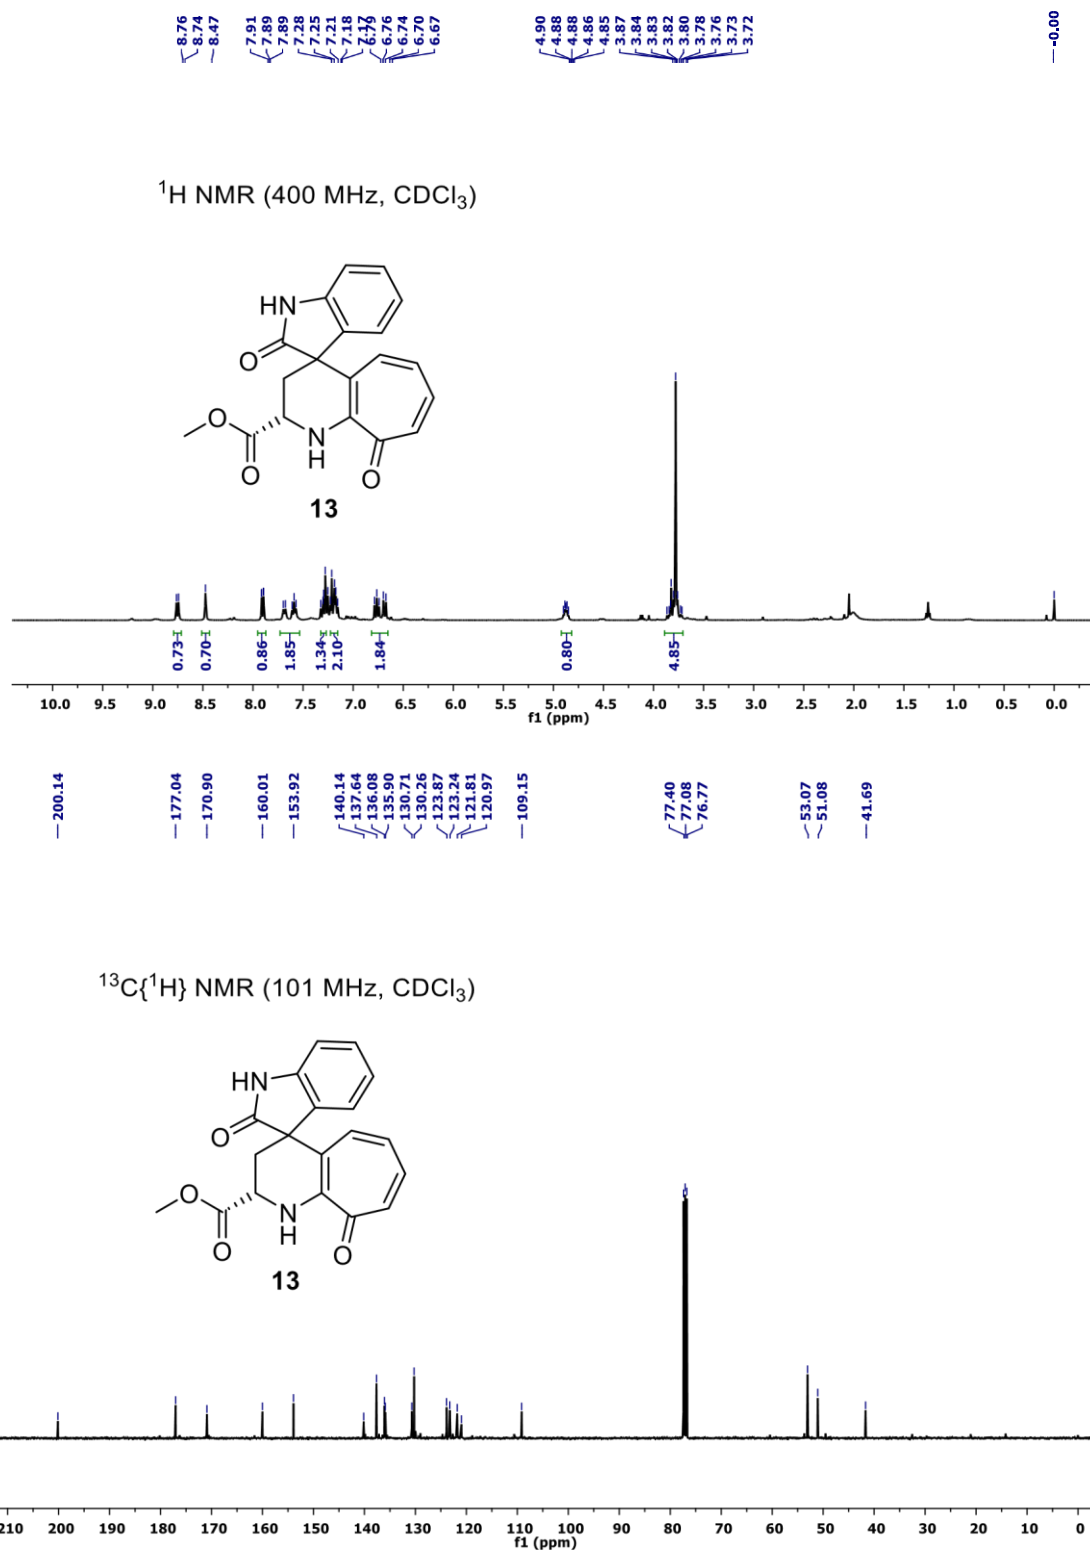

**Fig S144.**  $^1\text{H}$ ,  $^{13}\text{C}\{^1\text{H}\}$  NMR spectra of tropone-pipecolate fused spiro-oxindole **13**.

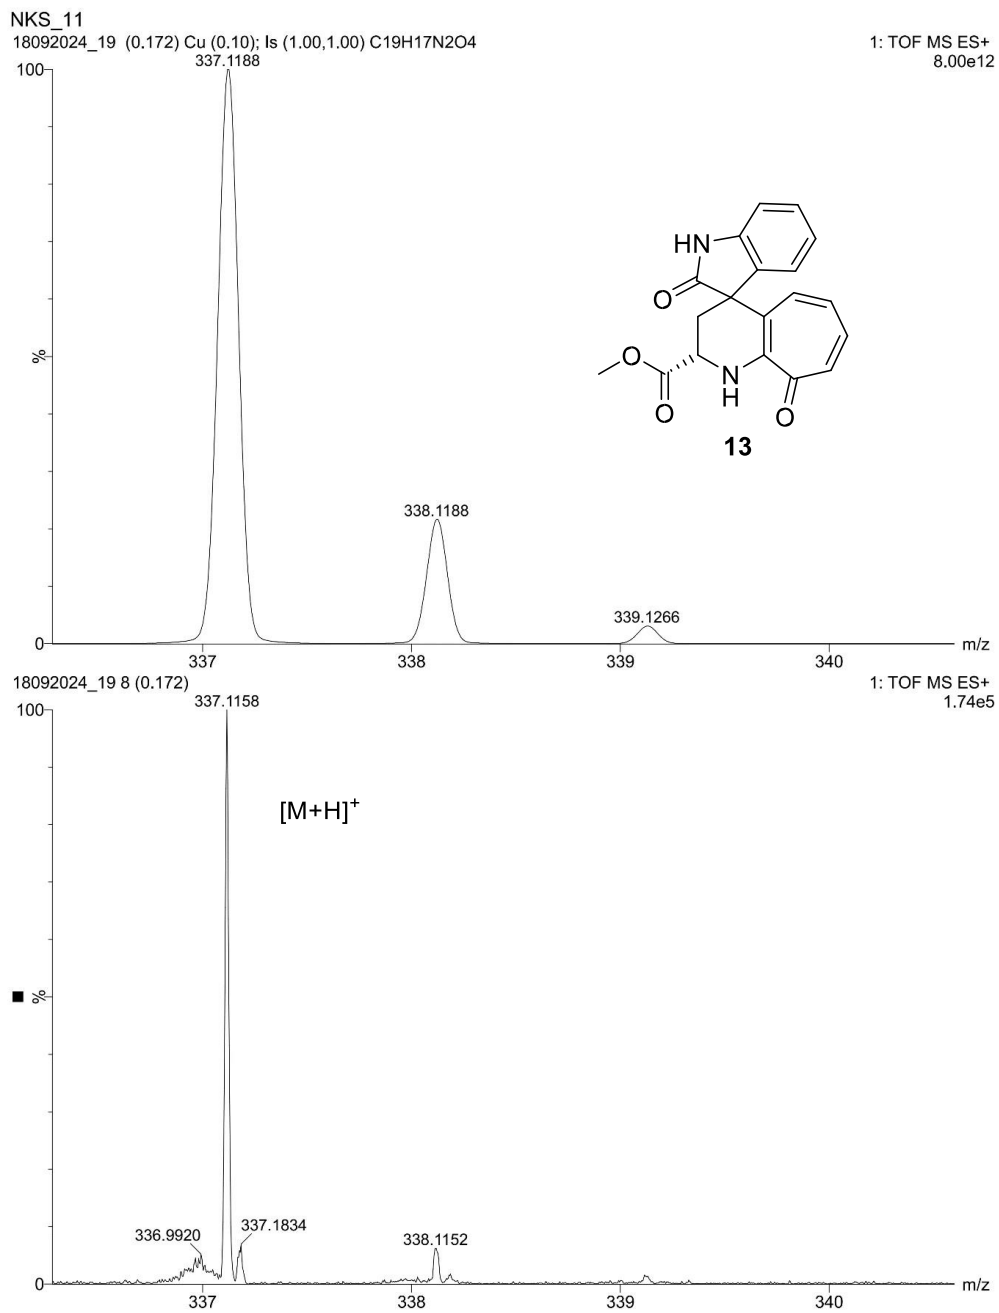

**Fig S145.** ESI-HRMS spectra of tropone-pipecolate fused spiro-oxindole **13**.

## 5. X-Ray Studies of Single Crystals

Single crystal of kynurenine derivative (**5g**) was obtained in solvent mixture ethylacetate and hexane by slow evaporation method. The crystal data of **5g** was collected on a Rigaku Oxford diffractometer at 100 K. Selected collection parameters and other crystallographic results are summarized below. The program package SHELXTL1 and Olex2 was used for structure solution and ORTEP diagram carried out by DIAMOND 3.2.

|                                             |                                          | <b>5g</b>                                                                     | <b>Table S1.</b> Crystal data and structure refinement for compound <b>5g</b> . |
|---------------------------------------------|------------------------------------------|-------------------------------------------------------------------------------|---------------------------------------------------------------------------------|
| Identification code                         |                                          | <b>5g</b>                                                                     |                                                                                 |
| Empirical formula                           |                                          | C <sub>38</sub> H <sub>40</sub> N <sub>4</sub> O <sub>12</sub> S <sub>2</sub> |                                                                                 |
| Formula weight                              |                                          | 808.86                                                                        |                                                                                 |
| Temperature/K                               |                                          | 100.00(10)                                                                    |                                                                                 |
| Crystal system                              |                                          | monoclinic                                                                    |                                                                                 |
| Space group                                 |                                          | P2 <sub>1</sub>                                                               |                                                                                 |
| a/Å                                         |                                          | 11.0125(2)                                                                    |                                                                                 |
| b/Å                                         |                                          | 8.54110(10)                                                                   |                                                                                 |
| c/Å                                         |                                          | 21.0020(3)                                                                    |                                                                                 |
| α/°                                         |                                          | 90                                                                            |                                                                                 |
| β/°                                         |                                          | 104.994(2)                                                                    |                                                                                 |
| γ/°                                         |                                          | 90                                                                            |                                                                                 |
| Volume/Å <sup>3</sup>                       |                                          | 1908.17(5)                                                                    |                                                                                 |
| Z                                           |                                          | 2                                                                             |                                                                                 |
| ρ g/cm <sup>3</sup>                         |                                          | 1.408                                                                         |                                                                                 |
|                                             | calc                                     |                                                                               |                                                                                 |
| μ/mm <sup>-1</sup>                          | 1.858 F (000)                            | 848.0                                                                         |                                                                                 |
| Crystal size/mm <sup>3</sup>                |                                          | 0.02 × 0.02 × 0.002                                                           |                                                                                 |
| Radiation                                   |                                          | Cu Kα (λ = 1.54184)                                                           |                                                                                 |
| 2θ range for data collection/°              |                                          | 8.312 to 150.842                                                              |                                                                                 |
| Index ranges                                | -13 ≤ h ≤ 13, -10 ≤ k ≤ 10, -26 ≤ l ≤ 14 | Reflections collected                                                         |                                                                                 |
|                                             | 16144                                    |                                                                               |                                                                                 |
| Independent reflections                     |                                          | 6776 [R <sub>int</sub> = 0.0544, R <sub>sigma</sub> = 0.0591]                 |                                                                                 |
| Data/restraints/parameters                  |                                          | 6776/1/517                                                                    |                                                                                 |
| Goodness-of-fit on F <sup>2</sup>           |                                          | 1.068                                                                         |                                                                                 |
| Final R indexes [I ≥ 2σ (I)]                |                                          | R <sub>1</sub> = 0.0331, wR <sub>2</sub> = 0.0905                             |                                                                                 |
| Final R indexes [all data]                  |                                          | R <sub>1</sub> = 0.0369, wR <sub>2</sub> = 0.0913                             |                                                                                 |
| Largest diff. peak/hole / e Å <sup>-3</sup> |                                          | 0.28/-0.31                                                                    |                                                                                 |
| Flack parameter                             |                                          | 0.052(8)                                                                      |                                                                                 |



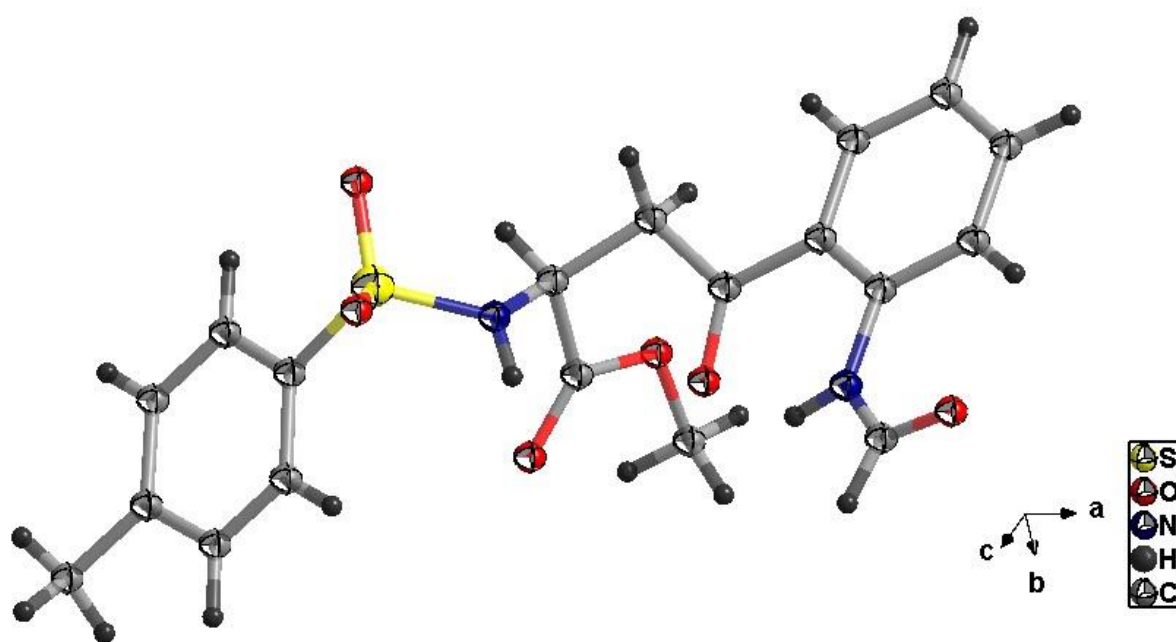

**Fig S146.** ORTEP diagram of kynurenine derivative (**5g**) [ellipsoid contour probability: 50%].

kynurenine derivative (**7b**) was obtained in solvent mixture ethylacetate and hexane by slow evaporation method. The crystal data of **7b** was collected on a Rigaku Oxford diffractometer at 100 K. Selected collection parameters and other crystallographic results are summarized below. The program package SHELXTL1 and Olex2 was used for structure solution and ORTEP diagram carried out by DIAMOND 3.2.

|                                             |                                          | <b>7b</b>                                                      | <b>Table S2.</b> Crystal data and structure refinement for compound <b>7b</b> . |
|---------------------------------------------|------------------------------------------|----------------------------------------------------------------|---------------------------------------------------------------------------------|
| Identification code                         |                                          | <b>7b</b>                                                      |                                                                                 |
| Empirical formula                           |                                          | C <sub>40</sub> H <sub>54</sub> N <sub>6</sub> O <sub>14</sub> |                                                                                 |
| Formula weight                              |                                          | 842.89                                                         |                                                                                 |
| Temperature/K                               |                                          | 100.01(11)                                                     |                                                                                 |
| Crystal system                              |                                          | triclinic                                                      |                                                                                 |
| Space group                                 |                                          | P1                                                             |                                                                                 |
| a/Å                                         |                                          | 9.6582(4)                                                      |                                                                                 |
| b/Å                                         |                                          | 10.8402(3)                                                     |                                                                                 |
| c/Å                                         |                                          | 12.8768(3)                                                     |                                                                                 |
| α/°                                         |                                          | 65.827(2)                                                      |                                                                                 |
| β/°                                         |                                          | 69.312(3)                                                      |                                                                                 |
| γ/°                                         |                                          | 63.964(3)                                                      |                                                                                 |
| Volume/Å <sup>3</sup>                       |                                          | 1080.08(7)                                                     |                                                                                 |
| Z                                           |                                          | 1                                                              |                                                                                 |
| ρ g/cm <sup>3</sup>                         |                                          | 1.296                                                          |                                                                                 |
|                                             | calc                                     |                                                                |                                                                                 |
| μ/mm <sup>-1</sup>                          | 0.826 F (000)                            | 448.0                                                          |                                                                                 |
| Crystal size/mm <sup>3</sup>                |                                          | 0.01 × 0.01 × 0.001                                            |                                                                                 |
| Radiation                                   |                                          | Cu Kα (λ = 1.54184)                                            |                                                                                 |
| 2θ range for data collection/°              |                                          | 7.7 to 155.582                                                 |                                                                                 |
| Index ranges                                | -12 ≤ h ≤ 12, -13 ≤ k ≤ 10, -16 ≤ l ≤ 15 | Reflections collected                                          |                                                                                 |
|                                             | 16820                                    |                                                                |                                                                                 |
| Independent reflections                     |                                          | 6208 [R <sub>int</sub> = 0.0562, R <sub>sigma</sub> = 0.0592]  |                                                                                 |
| Data/restraints/parameters                  |                                          | 6208/3/551                                                     |                                                                                 |
| Goodness-of-fit on F <sup>2</sup>           |                                          | 0.979                                                          |                                                                                 |
| Final R indexes [I ≥ 2σ (I)]                |                                          | R <sub>1</sub> = 0.0675, wR <sub>2</sub> = 0.1806              |                                                                                 |
| Final R indexes [all data]                  |                                          | R <sub>1</sub> = 0.0696, wR <sub>2</sub> = 0.1848              |                                                                                 |
| Largest diff. peak/hole / e Å <sup>-3</sup> |                                          | 0.63/-0.29                                                     |                                                                                 |
| Flack parameter                             |                                          | 0.06(15)                                                       |                                                                                 |

Single crystal of

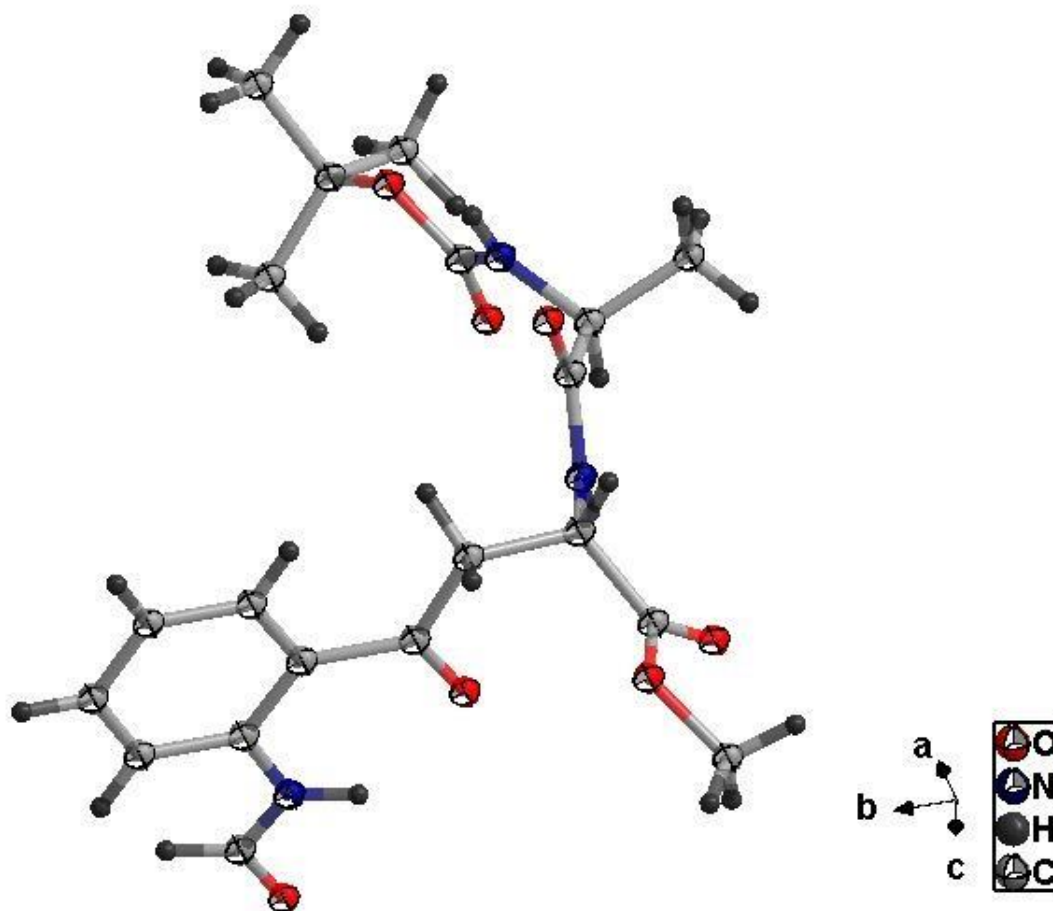

**Fig S147.** ORTEP diagram of kynurenine derivative (**7b**) [ellipsoid contour probability: 50%]. kynurenine derivative (**7g**) was obtained in solvent mixture ethylacetate and hexane by slow evaporation method. The crystal data of **7g** was collected on a Rigaku Oxford diffractometer at 100 K. Selected collection parameters and other crystallographic results are summarized below. The program package SHELXTL1 and Olex2 was used for structure solution and ORTEP diagram carried out by DIAMOND 3.2.

**Table S3.** Crystal data and structure refinement for compound **7g**.

|                                             |                                                               |
|---------------------------------------------|---------------------------------------------------------------|
| Identification code                         | <b>7g</b>                                                     |
| Empirical formula                           | C <sub>20</sub> H <sub>27</sub> N <sub>3</sub> O <sub>7</sub> |
| Formula weight                              | 421.44                                                        |
| Temperature/K                               | 100.15                                                        |
| Crystal system                              | triclinic                                                     |
| Space group                                 | P1 <small>calc</small>                                        |
| a/Å                                         | 5.03333(16)                                                   |
| b/Å                                         | 8.5410(3)                                                     |
| c/Å                                         | 13.3951(4)                                                    |
| α/°                                         | 82.934(3)                                                     |
| β/°                                         | 85.650(3)                                                     |
| γ/°                                         | 73.874(3)                                                     |
| Volume/Å <sup>3</sup>                       | 548.46(3)                                                     |
| Z                                           | 1                                                             |
| ρ g/cm <sup>3</sup>                         | 1.276                                                         |
| μ/mm <sup>-1</sup>                          | 0.814 F (000) 224.0                                           |
| Crystal size/mm <sup>3</sup>                | 0.01 × 0.01 × 0.001                                           |
| Radiation                                   | CuKα (λ = 1.54184)                                            |
| 2θ range for data collection/°              | 6.656 to 155.548                                              |
| Index ranges                                | -6 ≤ h ≤ 6, -10 ≤ k ≤ 10, -16 ≤ l ≤ 15                        |
| Reflections collected                       | 8615                                                          |
| Independent reflections                     | 3497 [R <sub>int</sub> = 0.0537, R <sub>sigma</sub> = 0.0617] |
| Data/restraints/parameters                  | 3497/3/287                                                    |
| Goodness-of-fit on F <sup>2</sup>           | 1.060                                                         |
| Final R indexes [I ≥ 2σ (I)]                | R <sub>1</sub> = 0.0427, wR <sub>2</sub> = 0.1122             |
| Final R indexes [all data]                  | R <sub>1</sub> = 0.0459, wR <sub>2</sub> = 0.1162             |
| Largest diff. peak/hole / e Å <sup>-3</sup> | 0.20/-0.20                                                    |
| Flack parameter                             | 0.2(3)                                                        |

Single crystal of

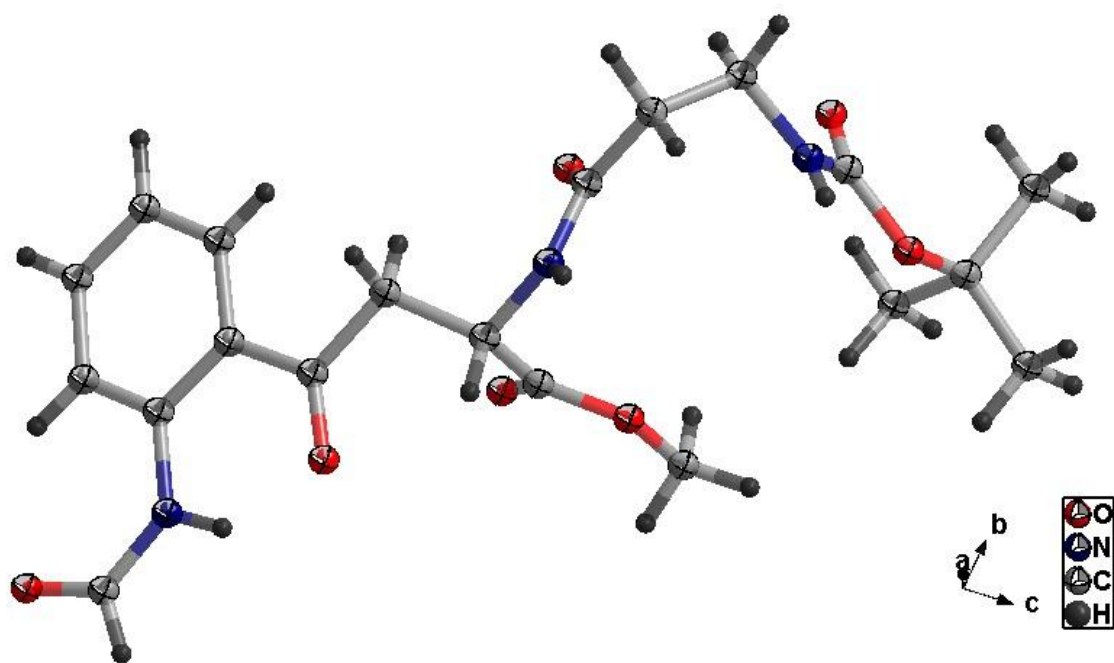

**Fig S148.** ORTEP diagram of kynurenine derivative (**7g**) [ellipsoid contour probability: 50%]. oxaspiro-oxindole (**8**) was obtained in solvent mixture ethylacetate and hexane by slow evaporation method. The crystal data of **8** was collected on a Rigaku Oxford diffractometer at 100 K. Selected collection parameters and other crystallographic results are summarized below. The program package SHELXTL1 and Olex2 was used for structure solution and ORTEP diagram carried out by DIAMOND 3.2.

**Table S4.** Crystal data and structure refinement for compound **8**.

|                                             |                                                                   |
|---------------------------------------------|-------------------------------------------------------------------|
| Identification code                         | <b>8</b>                                                          |
| Empirical formula                           | C <sub>16</sub> H <sub>18</sub> N <sub>2</sub> O <sub>5</sub>     |
| Formula weight                              | 318.32                                                            |
| Temperature/K                               | 100.15                                                            |
| Crystal system                              | orthorhombic                                                      |
| Space group                                 | P2 <sub>1</sub> 2 <sub>1</sub> 2 <sub>1</sub> <small>calc</small> |
| a/Å                                         | 5.6238(3)                                                         |
| b/Å                                         | 14.8768(8)                                                        |
| c/Å                                         | 19.4102(10)                                                       |
| α/°                                         | 90                                                                |
| β/°                                         | 90                                                                |
| γ/°                                         | 90                                                                |
| Volume/Å <sup>3</sup>                       | 1623.94(15)                                                       |
| Z                                           | 4                                                                 |
| ρ g/cm <sup>3</sup>                         | 1.302                                                             |
| μ/mm <sup>-1</sup>                          | 0.817 F (000) 672.0                                               |
| Crystal size/mm <sup>3</sup>                | 0.02 × 0.02 × 0.002                                               |
| Radiation                                   | CuKα (λ = 1.54184)                                                |
| 2θ range for data collection/°              | 7.488 to 155.81                                                   |
| Index ranges                                | -6 ≤ h ≤ 6, -18 ≤ k ≤ 18, -14 ≤ l ≤ 24                            |
| Reflections collected                       | 7534                                                              |
| Independent reflections                     | 3118 [R <sub>int</sub> = 0.0436, R <sub>sigma</sub> = 0.0390]     |
| Data/restraints/parameters                  | 3118/0/215                                                        |
| Goodness-of-fit on F <sup>2</sup>           | 1.053                                                             |
| Final R indexes [I ≥ 2σ (I)]                | R <sub>1</sub> = 0.0410, wR <sub>2</sub> = 0.1118                 |
| Final R indexes [all data]                  | R <sub>1</sub> = 0.0424, wR <sub>2</sub> = 0.1133                 |
| Largest diff. peak/hole / e Å <sup>-3</sup> | 0.18/-0.33                                                        |
| Flack parameter                             | 0.03(14)                                                          |

Single crystal of

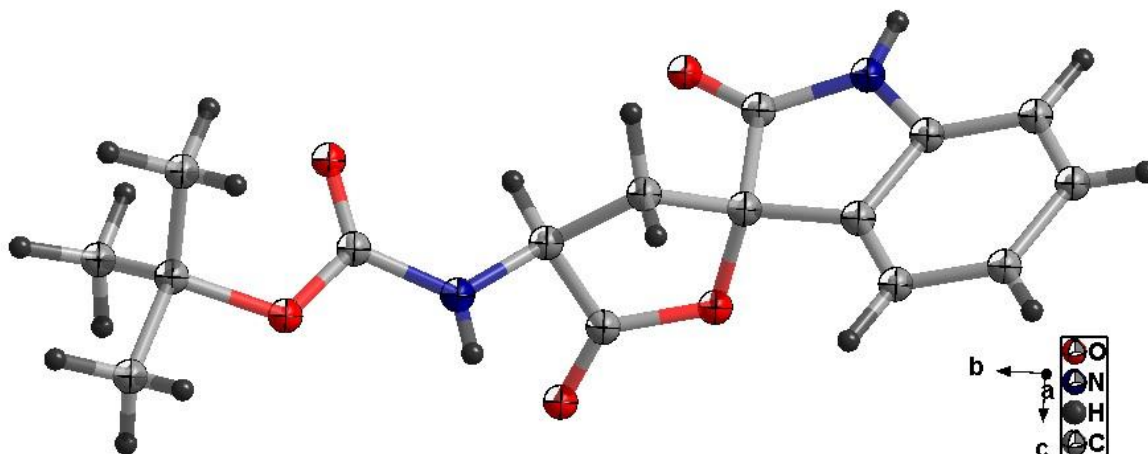

**Fig S149.** ORTEP diagram of oxaspirooxindole (**8**) [ellipsoid contour probability: 50%]. Spirooxindole (**13**) was obtained in solvent mixture ethylacetate and hexane by slow evaporation method. The crystal data of **13** was collected on a Rigaku Oxford diffractometer at 243 K. Selected collection parameters and other crystallographic results are summarized below. The program package SHELXTL1 and Olex2 was used for structure solution and ORTEP diagram carried out by DIAMOND 3.2.

**Table S5.** Crystal data and structure refinement for compound **13**.

|                                         |                                                                          |
|-----------------------------------------|--------------------------------------------------------------------------|
| Identification code                     | <b>13</b>                                                                |
| Empirical formula                       | C <sub>19</sub> H <sub>14</sub> N <sub>2</sub> O <sub>4</sub>            |
| Formula weight                          | 334.32                                                                   |
| Temperature/K                           | 243(60)                                                                  |
| Crystal system                          | monoclinic                                                               |
| Space group                             | C2/c <small>calc</small>                                                 |
| a/Å                                     | 15.6051(10) $\mu/\text{mm}^{-1}$ 0.099                                   |
| b/Å                                     | 9.8026(6) F (000) 1392.0                                                 |
| c/Å                                     | 21.1562(13) Crystal size/mm <sup>3</sup> 0.01 × 0.01 × 0.001             |
| $\alpha/^\circ$                         | 90 Radiation MoK $\alpha$ ( $\lambda = 0.71073$ )                        |
| $\beta/^\circ$                          | 98.295(6) 2 $\Theta$ range for data collection/ $^\circ$ 6.996 to 60.464 |
| $\gamma/^\circ$                         | 90 Index ranges -21 ≤ h ≤ 21, -13 ≤ k                                    |
| Volume/Å <sup>3</sup>                   | 3202.4(3) ≤ 12, -28 ≤ l ≤ 27 Reflections                                 |
| Z                                       | 8 collected 15065                                                        |
| $\rho$ g/cm <sup>3</sup>                | 1.387 Independent reflections 3943 [ $R_{\text{int}} = 0.0427$ ,         |
|                                         | $R_{\text{sigma}} = 0.0358$ ]                                            |
| Data/restraints/parameters              | 3943/0/227                                                               |
| Goodness-of-fit on F <sup>2</sup>       | 1.058                                                                    |
| Final R indexes [ $I \geq 2\sigma(I)$ ] | $R_1 = 0.0647$ , $wR_2 = 0.1742$                                         |
| Final R indexes [all data]              | $R_1 = 0.0822$ , $wR_2 = 0.1841$ Largest                                 |
| diff. peak/hole / e Å <sup>-3</sup>     | 0.34/-0.28                                                               |



Single crystal of

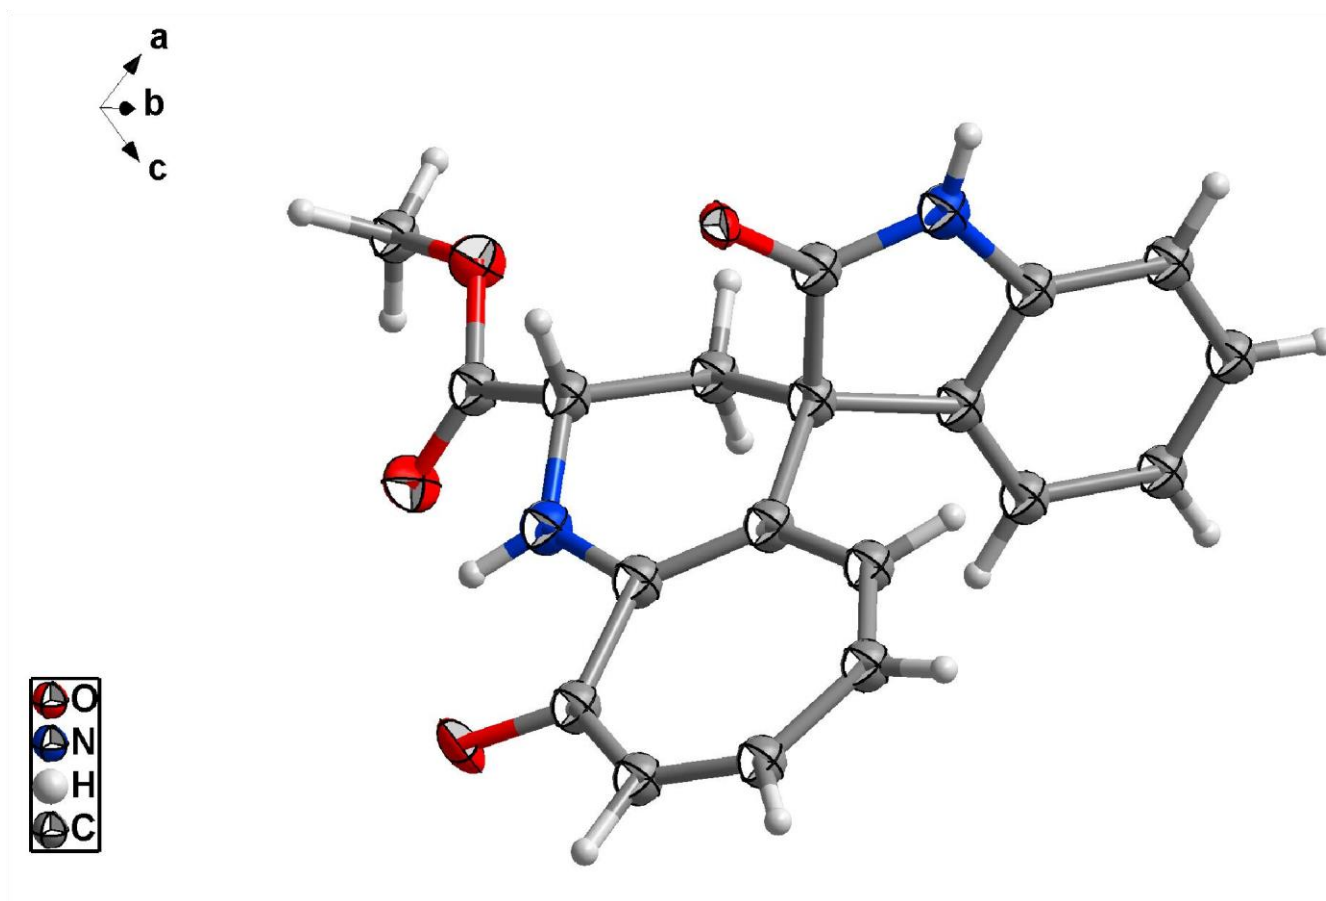

**Fig S150.** ORTEP diagram of spiro-oxindole (**13**) [ellipsoid contour probability: 50%].

## 6. Biofilm Assay

Biofilm formation ability in presence of various synthesized kynurenine derivatives was studied qualitatively and quantitatively by falcon tube and microtitre plate assay. For qualitative analysis, 20  $\mu\text{L}$  of overnight grown culture (OD595 adjusted to 0.5) of *Pseudomonas aeruginosa* (PA14) was inoculated into 2 ml LB broth supplemented with 100  $\mu\text{M}$  of the kynurenine moieties and incubated at 37°C for 48 h. After incubation the culture was carefully decanted and the tube was rinsed twice by milli-Q water followed by staining with 0.1% aqueous solution of crystal violet for 30 min at room temperature. The crystal violet stain was carefully decanted and the tubes were washed with milli-Q water thrice followed by air drying and crystal violet ring observation.

For quantitative analysis, 10  $\mu\text{L}$  of overnight grown culture (OD<sub>595</sub> adjusted to 0.5) of PA14 was inoculated into 100  $\mu\text{L}$  LB broth supplemented with 100  $\mu\text{g}/\text{ml}$  of the synthesized compounds taken in a micro-titre plate and incubated at 37°C for 48 h under moist condition. After incubation the supernatant were carefully taken off and unattached cells in the supernatant were carefully removed followed by washing with milliQ water twice. 125  $\mu\text{L}$  of 0.1% crystal violet solution was added and micro-titre plate was incubated for 30 min followed by washing with milli-Q water thrice. The plates were air-dried and de-stained with 200  $\mu\text{L}$  of 30% acetic acid and biofilm formation was indirectly quantified in terms of optical density of dissolved crystal violet at 595nm. Compounds showing significant biofilm reduction were further tested for their anti-biofilm activity in dose dependent manner taking concentration range from 20  $\mu\text{M}$  to 100  $\mu\text{M}$  and their IC<sub>50</sub> values for biofilm formation were obtained.

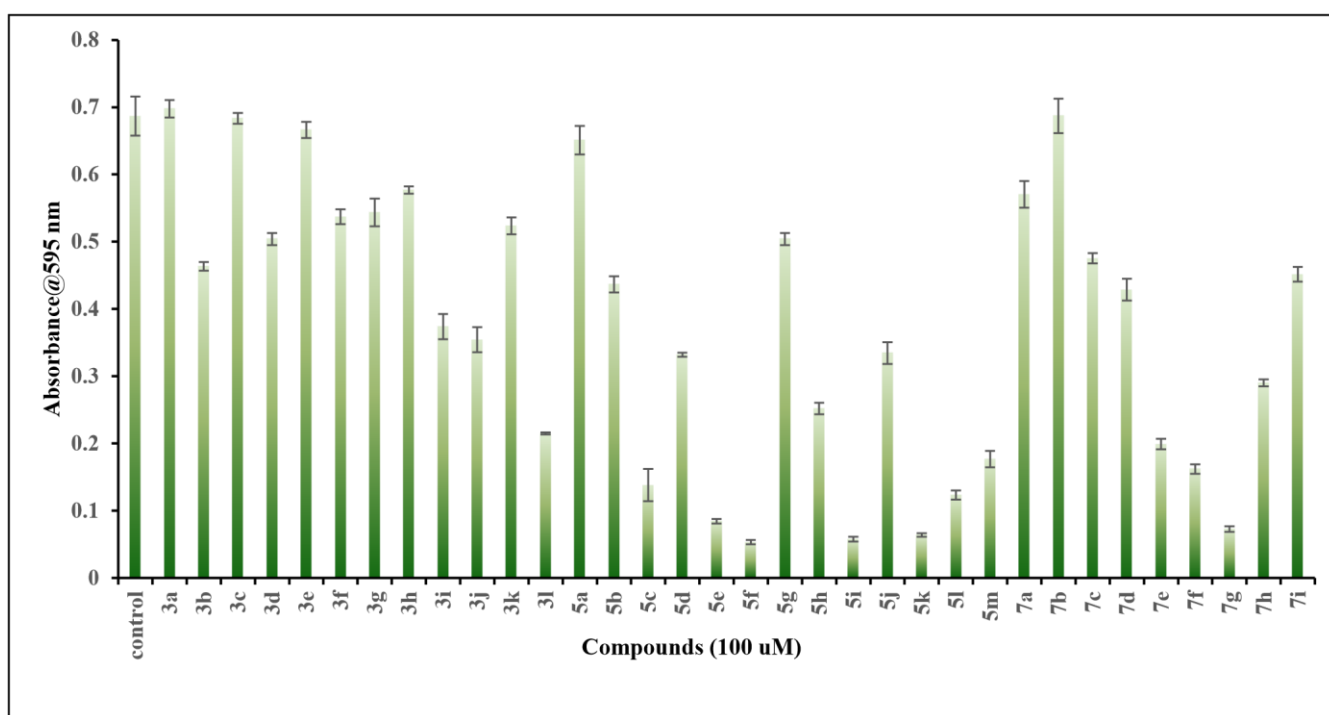

**Fig S151.** Quantitative analysis of *P. aeruginosa* biofilm formation in absence (control) or presence of kynurenine derivatives (**3a-3l/5a-5m/7a-7i**) at 100  $\mu\text{M}$  concentration. Error bars are mean  $\pm$  standard deviation (SDs).

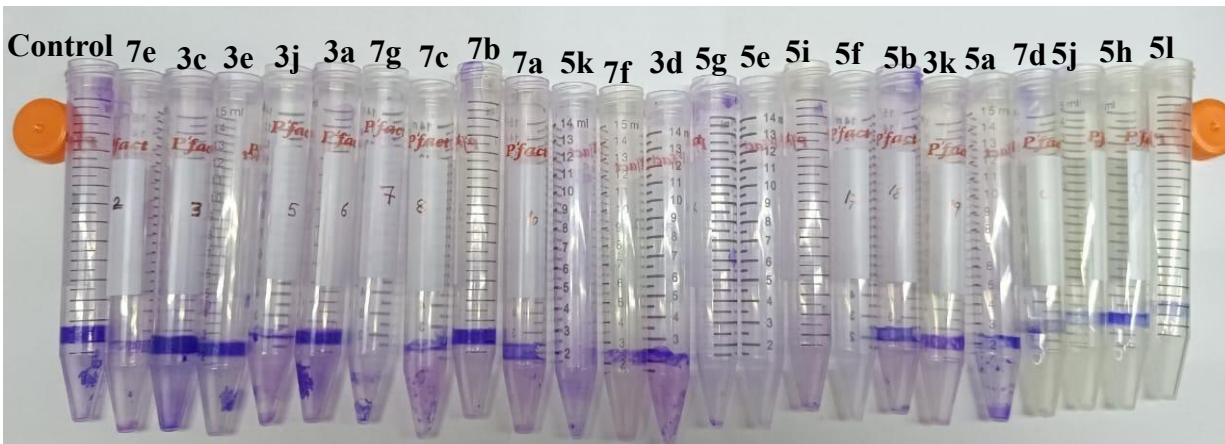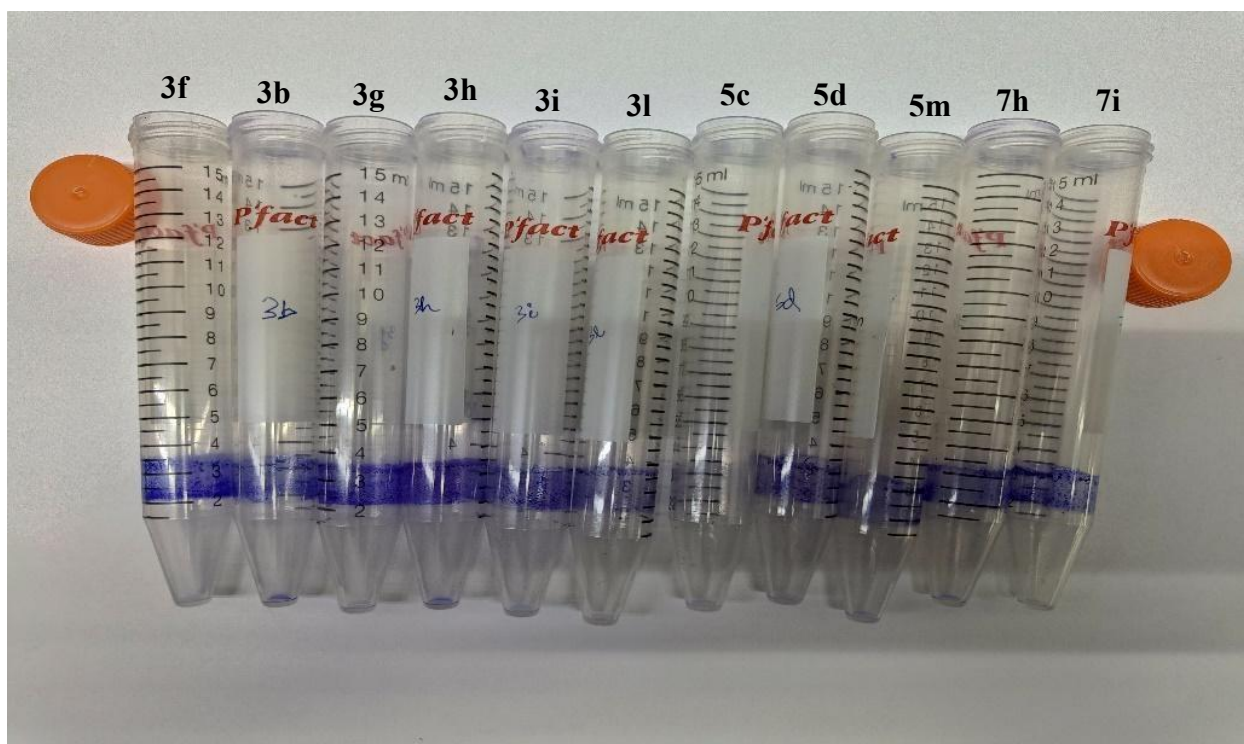

**Fig S152.** Images of biofilm formation for control and all the kynurenine derivatives (3a-3l/5a5m/7a-7i) tested for 100  $\mu$ M concentration.

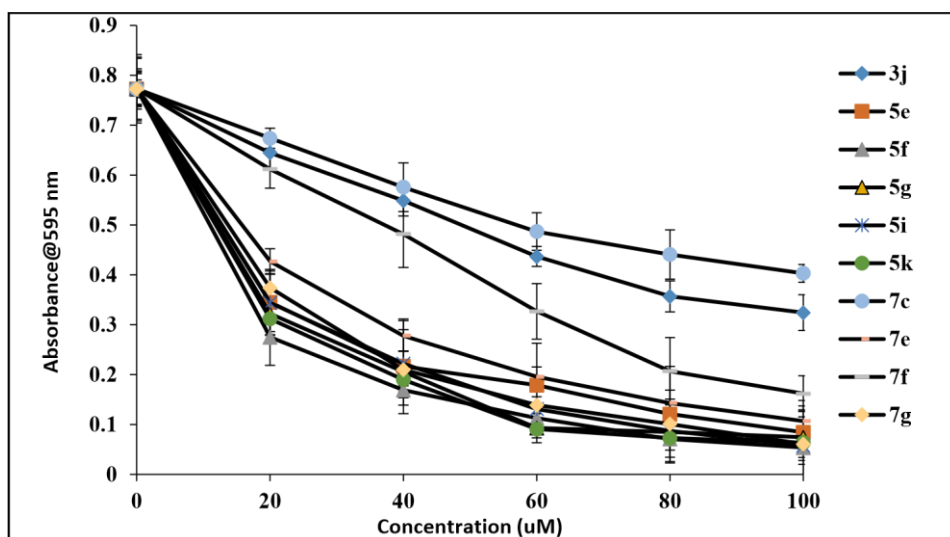

**Fig S153.** Concentration dependent quantitative biofilm assay. Error bars are mean  $\pm$  standard deviation (SDs).

**Table S6.** IC-50 values analysed from biofilm assay.

| Compound | IC-50<br>(concentration<br>in $\mu$ M) |
|----------|----------------------------------------|
| 3j       | 64.06                                  |
| 5e       | 32.46                                  |
| 5g       | 17.81                                  |
| 5i       | 28.85                                  |
| 5f       | 15.52                                  |
| 5k       | 15.68                                  |
| 7c       | 53.35                                  |
| 7e       | 30.25                                  |
| 7f       | 76.14                                  |
| 7g       | 20.65                                  |

## 7. Pyocyanin Assay

In order to assess the effect of synthesized kynurenine derivatives on pyocyanin production, *PA 14* were grown overnight in 5 mL minimal media (Himedia) in presence of 100  $\mu\text{M}$  of the synthesized compounds (only the substrates showing significant result in biofilm assay) under shaking condition. After incubation, supernatant was collected from the 5 mL culture by centrifugation of the entire culture at 5000 rpm for 15 min at room temperature. The pyocyanin fraction was further extracted by adding 3 mL chloroform in the supernatant. Pyocyanin was then re-extracted into 1 mL of acidified water (0.2 mol/L HCl) which gave a pink-red solution. For the quantitation of the pyocyanin within the solution, the absorbance was measured at 520 nm. Pyocyanin inhibition was also performed at variable concentration to analyze their  $\text{IC}_{50}$  values for pyocyanin production.

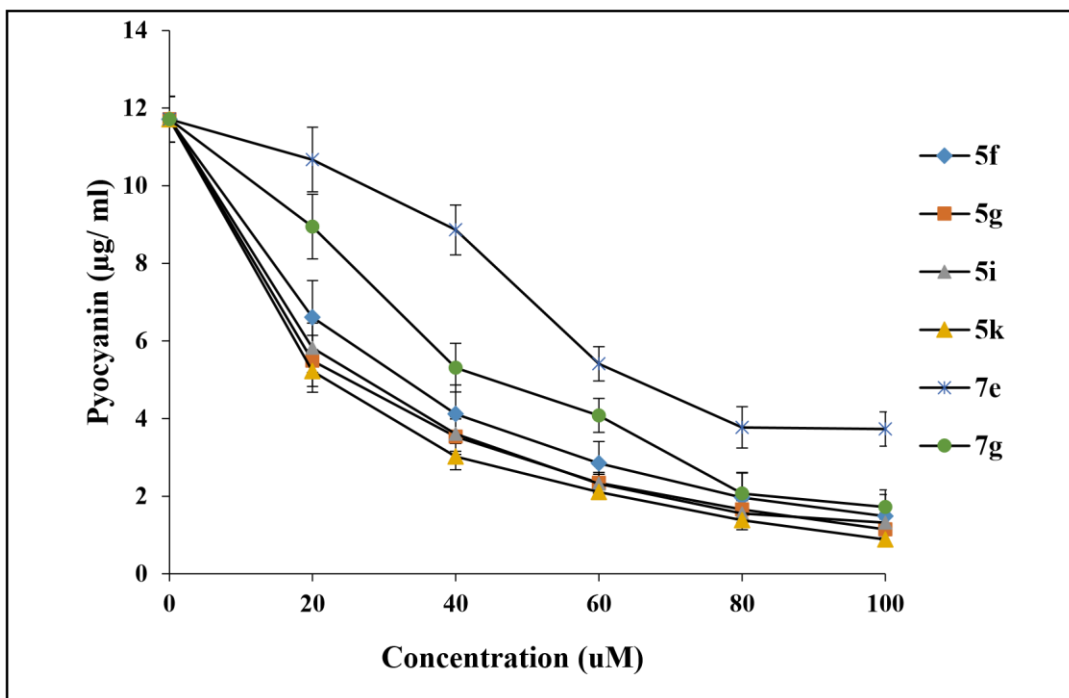

**Fig S154.** Concentration dependent quantitative pyocyanin assay. Error bars are mean  $\pm$  standard deviation (SDs).

**Table S7.**  $\text{IC}_{50}$  values analysed from pyocyanin assay.

| Compound | IC-50<br>(concentration<br>in $\mu\text{M}$ ) |
|----------|-----------------------------------------------|
| 5f       | 28.07                                         |
| 5g       | 27.73                                         |
| 5i       | 22.26                                         |
| 5k       | 20.56                                         |
| 7e       | 51.45                                         |
| 7g       | 39.74                                         |

## 8. Swarming Motility Assay

Swarming motility assays were performed in M9 medium (Himedia) amended with 0.5% Bacto™ casamino acids (BD) and solidified with 0.6% Bacto™ agar (BD). 10 ml of swarm media supplemented with 100  $\mu\text{M}$  of different kynurenine derivatives were poured on petridishes (60 mm diameter) and were allowed to dry for 30 min. The plates were spot inoculated at the centre with one isolated colony grown on LB with the help of a straight wire loop. The plates were incubated in upright position at 37 °C for 24 hours. The plates were carefully taken out and observed for tendrill formation. Images were taken in Gel Doc™ XR+ and processed by using Image lab™ software.

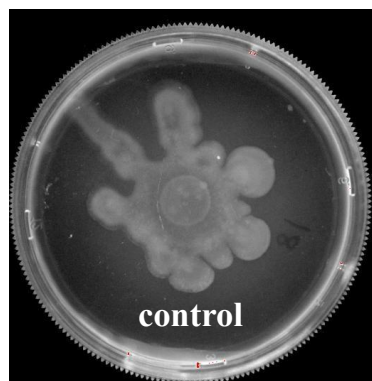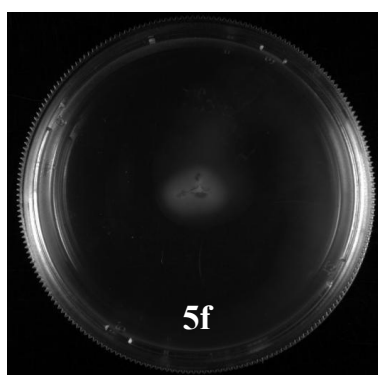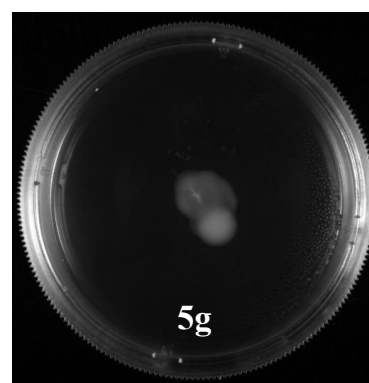

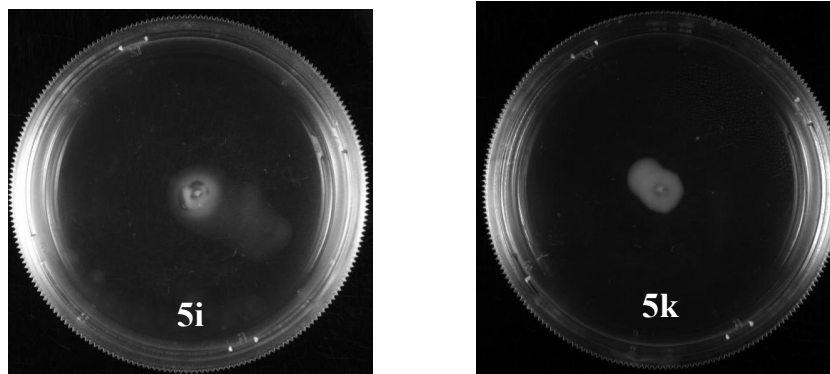

**Fig S155.** Swarming images of *P. aeruginosa* (PA14) in the absence (DMSO control) or presence of compounds (**5f**, **5g**, **5i** and **5k**; 100  $\mu$ M concentration)

## 9. Scanning Electron Microscopy (SEM) Analysis

Bacterial biofilm was grown on silicon wafer substrate by inoculating 10  $\mu$ L of overnight grown culture of *PA14* into 1 mL LB broth supplemented with 100  $\mu$ M of the kynurenine derivatives and incubated at 37°C for 48 h. The biofilm substrate was then removed from the growth medium and rinsed with phosphate-buffered saline (PBS) to remove any non-adherent bacteria. The biofilm was then fixed with 2.5% glutaraldehyde in PBS for 12 h at 4 °C. It was then subjected to a graded ethanol series for dehydration and then allowed to air dry. The substrates were then sputter-coated with platinum to increase their conductivity and SEM images were recorded.

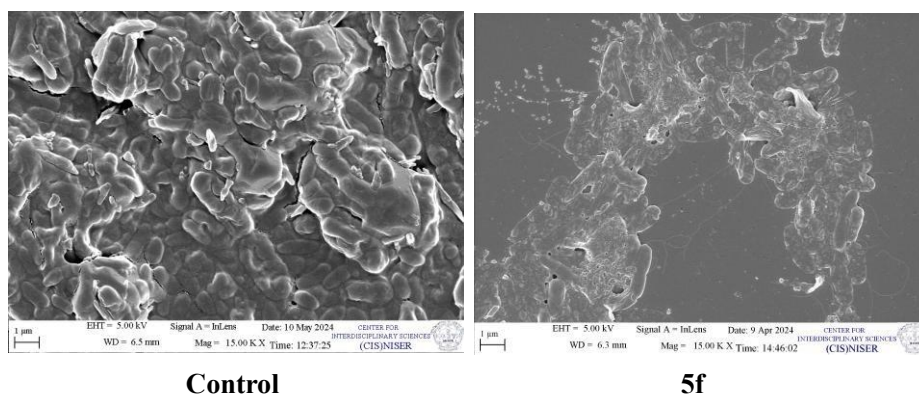

**Control**

**5f**

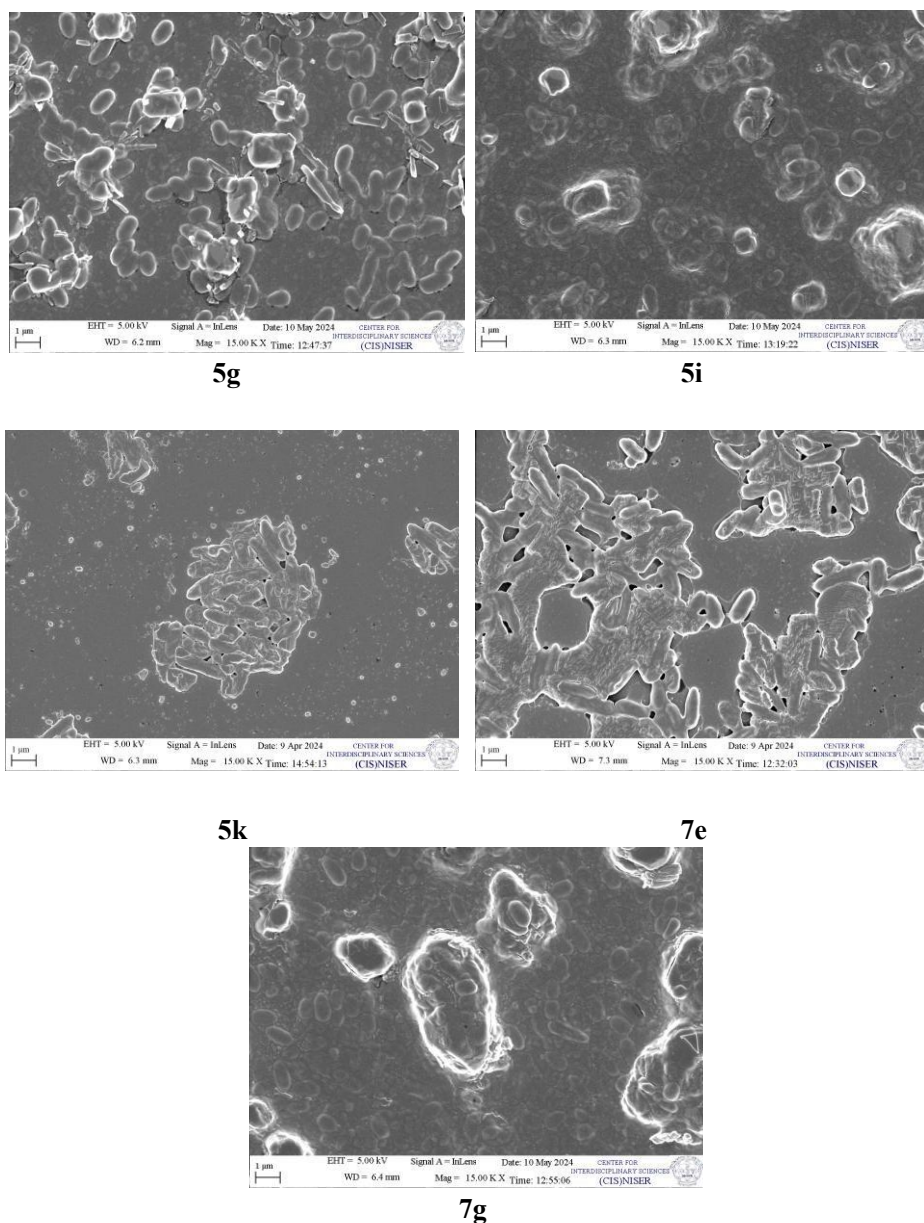

**Fig S156.** SEM images of biofilms developed by *P. aeruginosa* illustrating the effect of kynurenine derivatives (**5f/5g/5i/5k/7e/7g**) at 100  $\mu$ M concentration on biofilm formation.

## 10. Bacterial Growth Curve Measurement

A single colony of the bacterial strain was inoculated into small volume of LB media. The overnight culture was diluted to OD600 of approximately 0.1 in fresh growth medium. 200  $\mu$ L of the diluted bacterial culture along with 100  $\mu$ M of the kynurenine derivatives were added into each well of the 96-well microtitre plate. OD was recorded at 600 nm in every 15min interval for an overall period of 24 h using a plate reader.



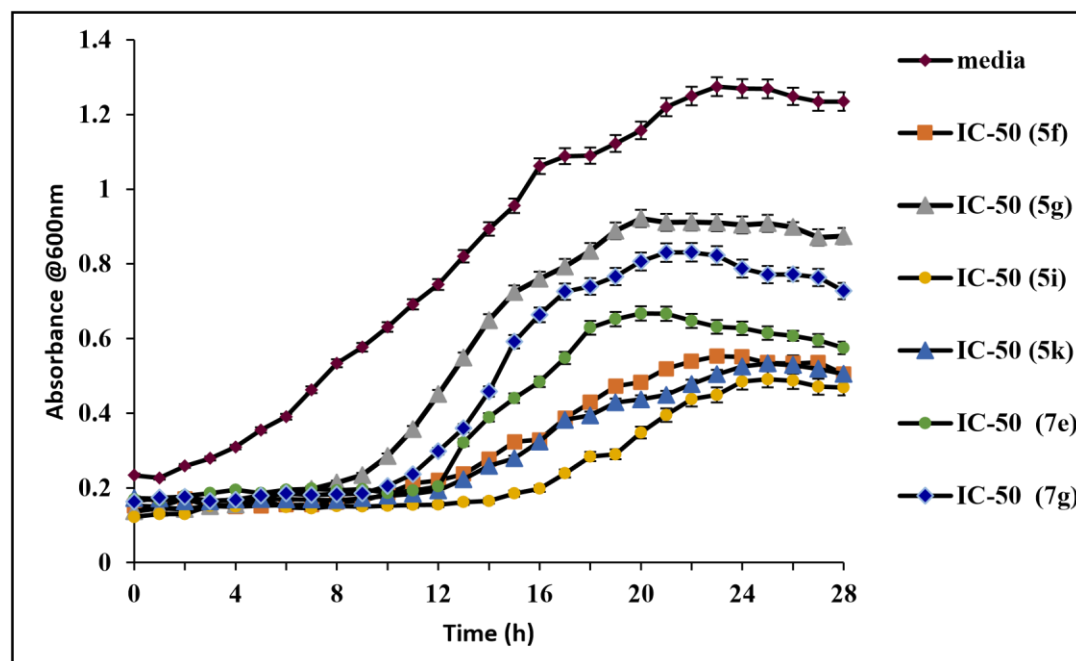

**Fig S157.** Growth curve of *P. aeruginosa* grown at 37 °C for 24 h treated with different kynurenine derivatives at their respective IC-50 concentration. Error bars are mean  $\pm$  standard deviations (SDs).

## 11. QRT-PCR (Quantitative Real-Time Polymerase Chain Reaction) Analysis

RNA was extracted from overnight grown 2 mL culture of PA14 treated with kynurenine derivatives using the RiboPur<sup>TM</sup> kit (Ambion) according to the manufacturer's instruction. RNA purity was assessed by spectrophotometer (NanoDrop ND-1000). Samples showing ratios of  $A_{260}/A_{280}$  close to 2.0 were selected. First strand cDNA was synthesized from 1  $\mu$ g of treated RNA using the Verso cDNA synthesis kit (Thermo Scientific) as per manufacturer's guidelines. Primers were designed for *lasI*, *lasB*, *lasR* genes using the sequences obtained from pseudomonas database (<https://www.pseudomonas.com/>) (Table S8). cDNA was diluted 10-fold and combined with primer pairs and PowerU<sup>TM</sup> SYBR® Green Master Mix (Thermo Scientific) on an Applied Biosystems real-time PCR system (QuantStudio 6 and 7 Flex Real Time PCR System) according to the following protocol: 95°C for 2 min; 40 cycles of 95°C for 3 sec, 60°C for 30 sec; followed by a melt curve cycle. The housekeeping gene 16S ribosomal RNA (rRNA) was used as an internal standard for quantification of the total RNA. For each gene, a common threshold setting applied to each of the three biological replicates determined the threshold cycle ( $C_T$ ). Relative abundance of each gene was determined by the  $2^{-\Delta\Delta C_T}$  method.

**TABLE S8.** Primers used for quantitative RT-PCR.

| <b>Gene</b> | <b>PCR primer sequence (5' – 3')</b> |
|-------------|--------------------------------------|
| <i>lasI</i> | Fw: GGTTATGACGCACTCAGTCC             |
|             | Rv: TTCAGCATGTAGGGGCCAGT             |
| <i>lasR</i> | Fw: GTGGAAAATTGGAGTGGAGC             |
|             | Rv: ACGATGAAGGCGTTCTCGTA             |
| <i>lasB</i> | Fw: GACCTGATCGACGTGTCCAA             |
|             | Rv: ATCGCTTTCAGTTCGTCGGC             |
| 16s         | Fw: TAAGCACCGGCTAACTTCGT             |
|             | Rv: AACACCTACGCGCGCTTA               |

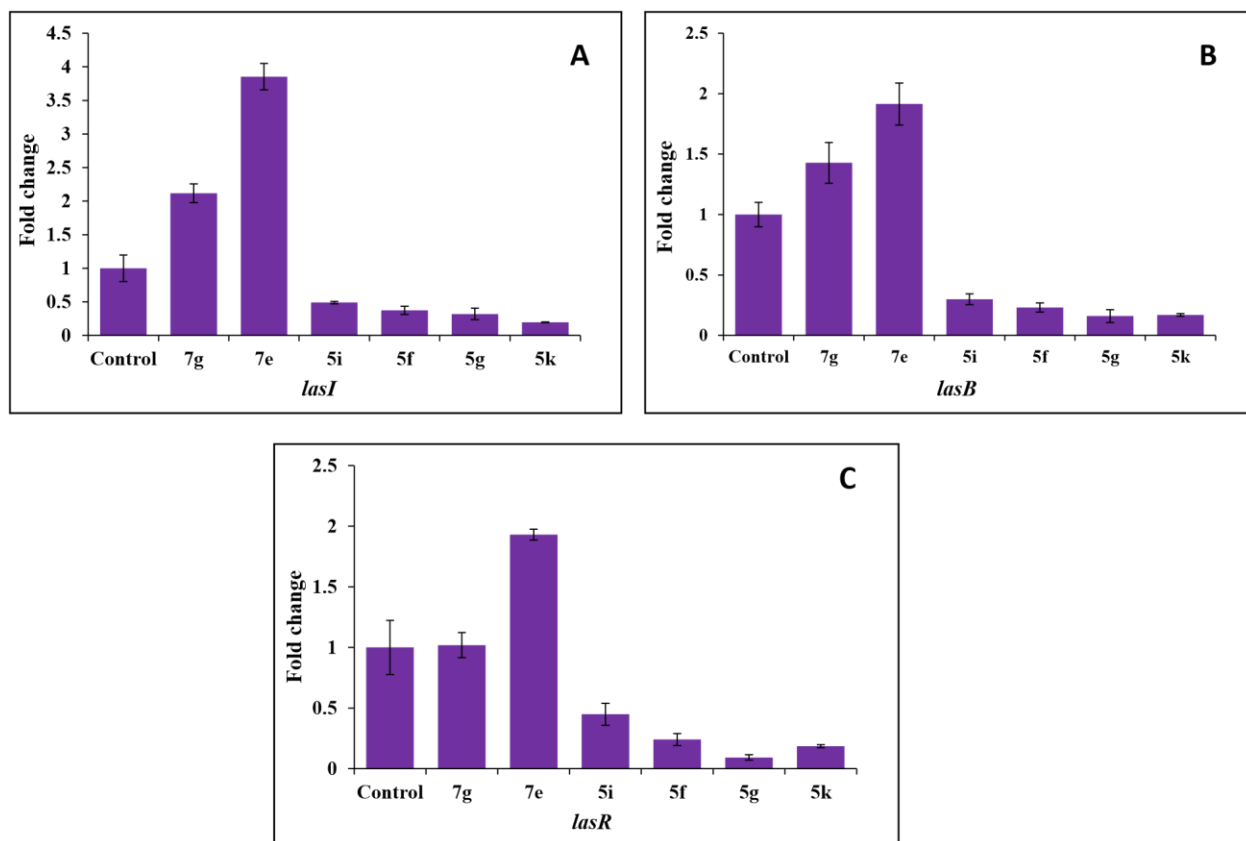

**Fig S158.** Effect of kynurenine treatment on expression of QS-related genes, Quantitative realtime PCR analysis showing the transcript levels of (A) *lasI* genes and (B) *lasB* genes and (C) *lasR* genes in the presence of kynurenine derivatives (5f, 5g, 5i, 5k, 7e, 7g) at their IC-50 concentration. Error bars are mean  $\pm$  standard deviations (SDs).

## 12. Plausible Mechanisms for the Synthesis of Spirocyclic Motifs

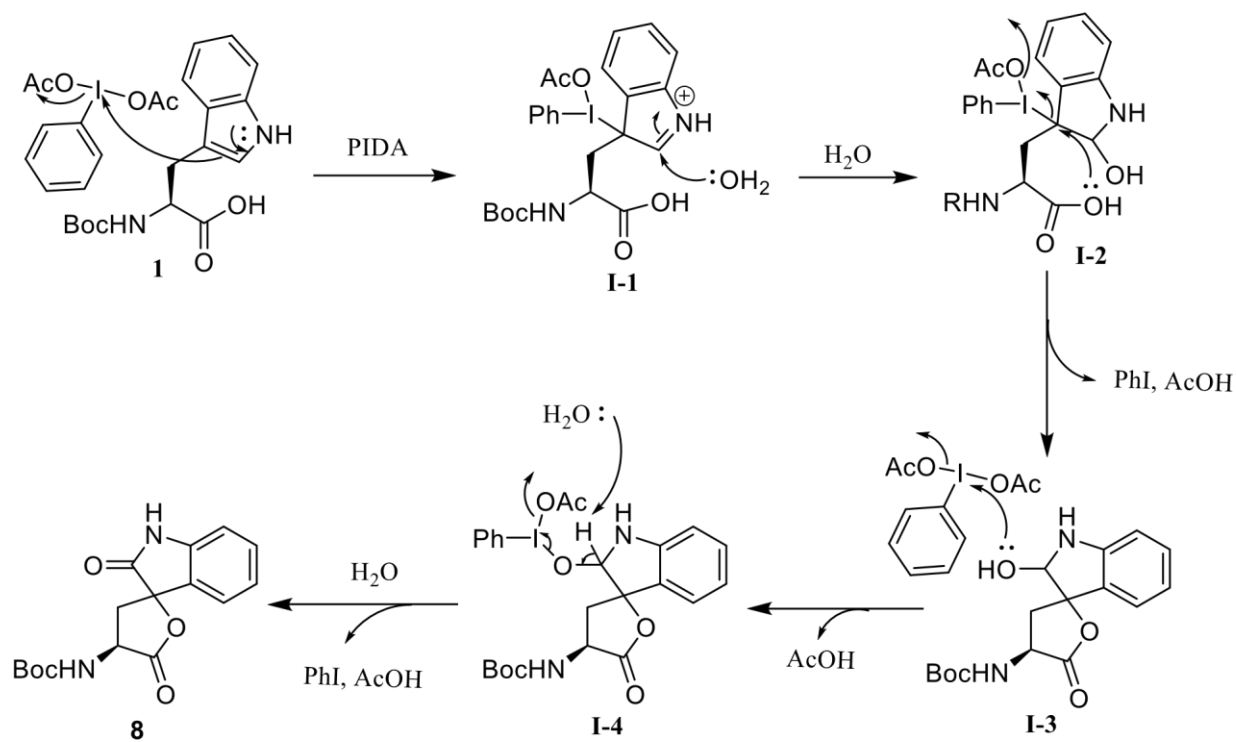

**Fig S159.** Plausible mechanism for the synthesis of oxaspiro-oxindole **8**.

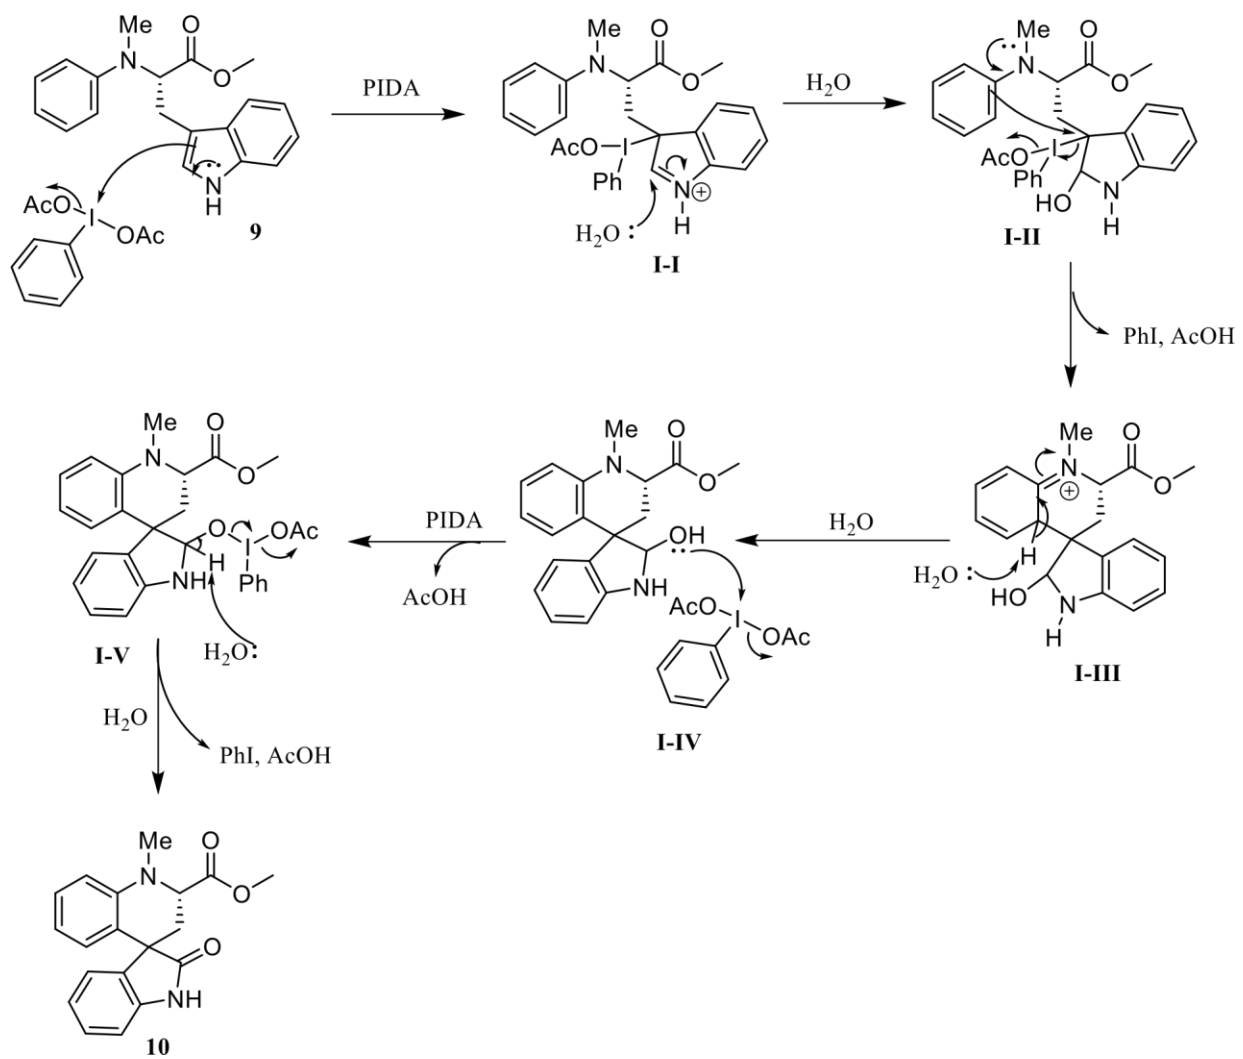

**Fig S160.** Plausible mechanism for the synthesis of spiro-oxindole **10**.

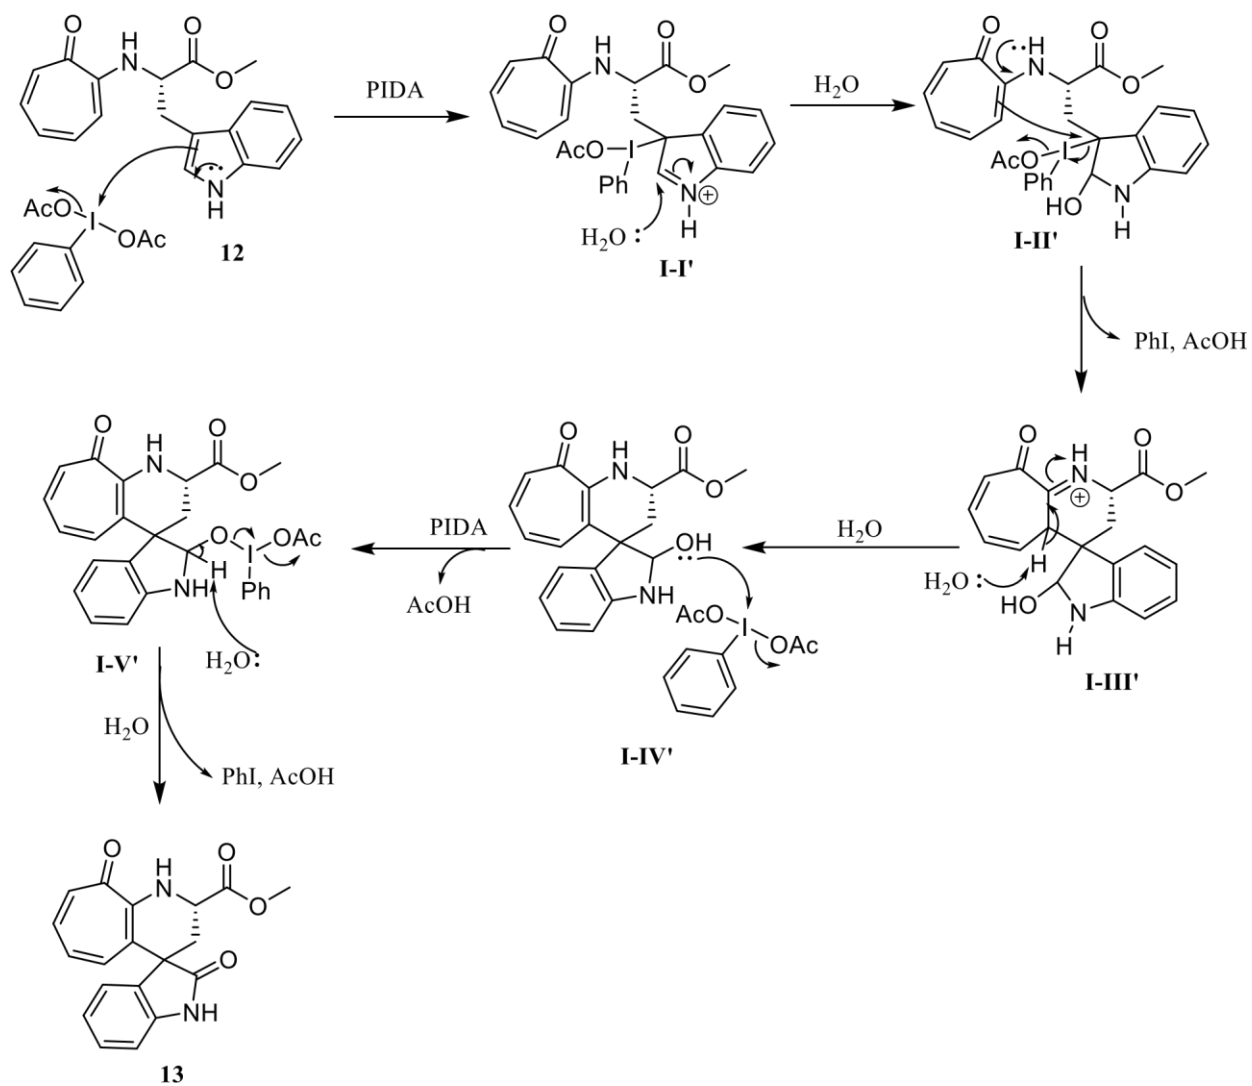

**Fig S161.** Plausible mechanism for the synthesis of spiro-oxindole **13**.
